# Supplementary material for: Guy1, a Y-linked embryonic signal, regulates dosage compensation in Anopheles stephensi by increasing X gene expression
Source: eLife journal article supplement (doi:10.7554/elife.43570), 2019-03-19
Supplement: supp [file elife-43570-supp-v1.zip]

Archive with 9 entries (9 files):
- elife_poa_e43570_Supplementary_file_2.docx
- elife_poa_e43570_Figure_1_figure_supplement_1.pdf
- elife_poa_e43570_Transparent_Reporting_File.docx
- elife_poa_e43570_Supplementary_file_5.docx
- elife_poa_e43570_Supplementary_file_1.docx
- elife_poa_e43570_Supplementary_file_3.docx
- elife_poa_e43570_Supplementary_file_4.xlsx
- elife_poa_e43570_Figure_2_figure_supplement_1.pdf
- elife_poa_e43570_Figure_1_figure_supplement_2.pdf
