# Supplementary material for: Guy1, a Y-linked embryonic signal, regulates dosage compensation in Anopheles stephensi by increasing X gene expression
Source: eLife journal article supplement (doi:10.7554/elife.43570), 2019-03-19
Supplement: supp [file elife-43570-supp-v1.zip › elife_poa_e43570_Figure_1_figure_supplement_1.pdf]

A

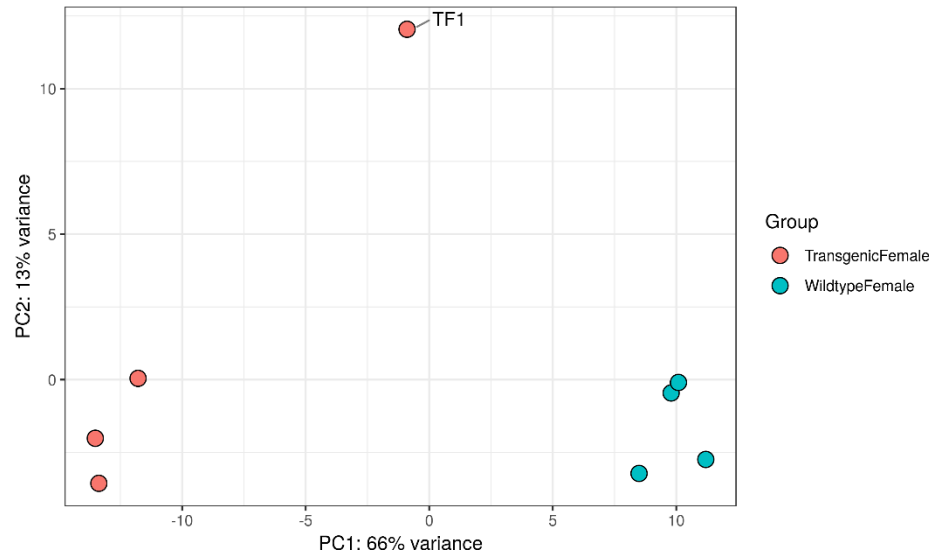

B

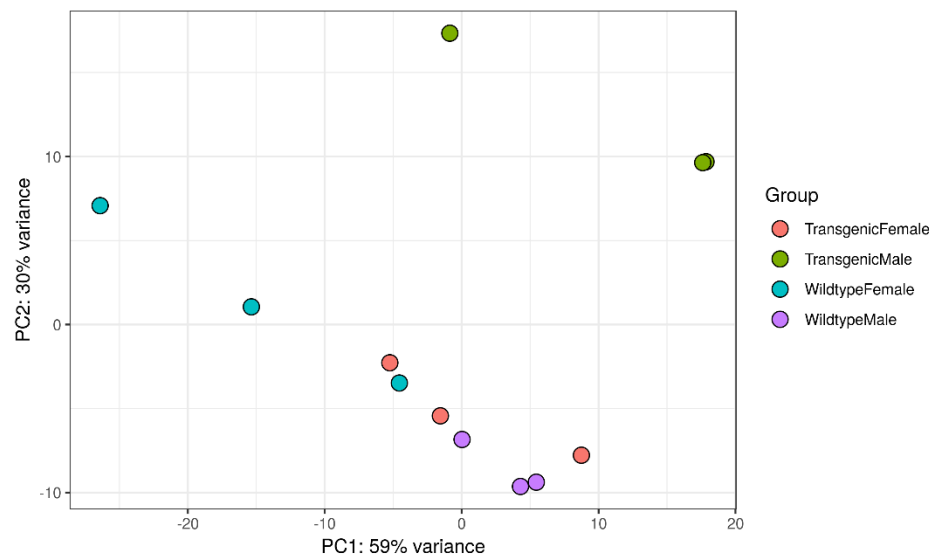

**Figure 1-figure supplement 1. Principal component analysis of replicates from Experiment A (Panel A, two genotypes from *nGuy1\_2*) and Experiment B (Panel B, 4 genotypes from *nGuy1\_1*). The Euclidean distance between samples was calculated based on the *regularized-logarithm* transformed count data, implemented in the package DESeq2. In Panel A, one of the four transgenic female replicates (TF1) was excluded when transgenic female replicates were analyzed as a group.**
