# Supplementary material for: Guy1, a Y-linked embryonic signal, regulates dosage compensation in Anopheles stephensi by increasing X gene expression
Source: eLife journal article supplement (doi:10.7554/elife.43570), 2019-03-19
Supplement: supp [file elife-43570-supp-v1.zip › elife_poa_e43570_Figure_2_figure_supplement_1.pdf]

A

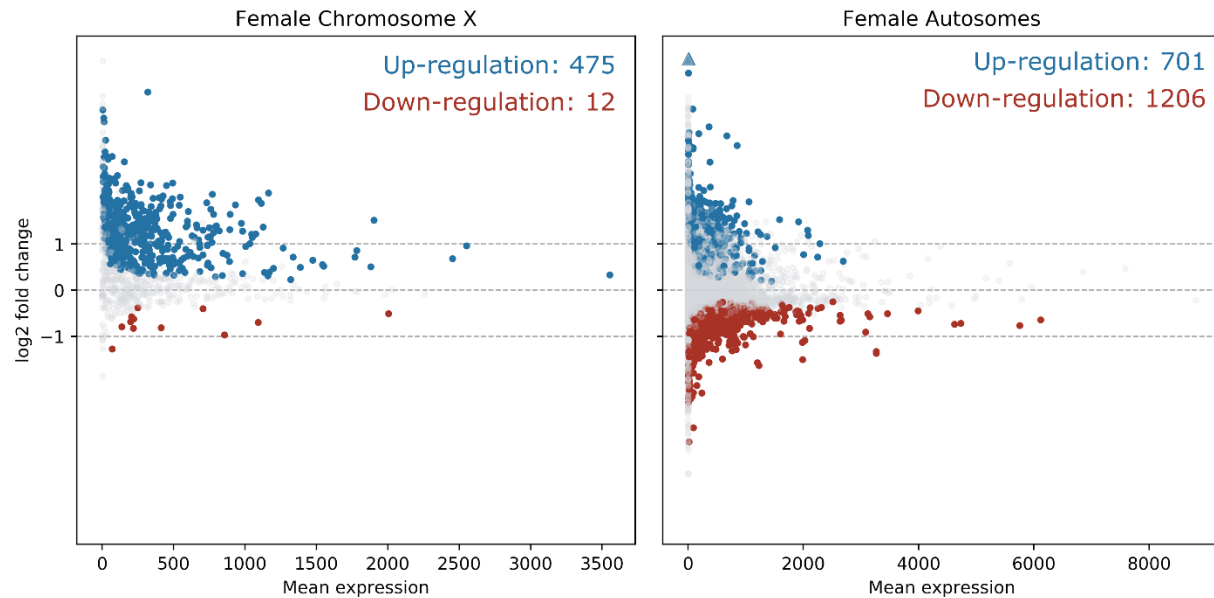

B

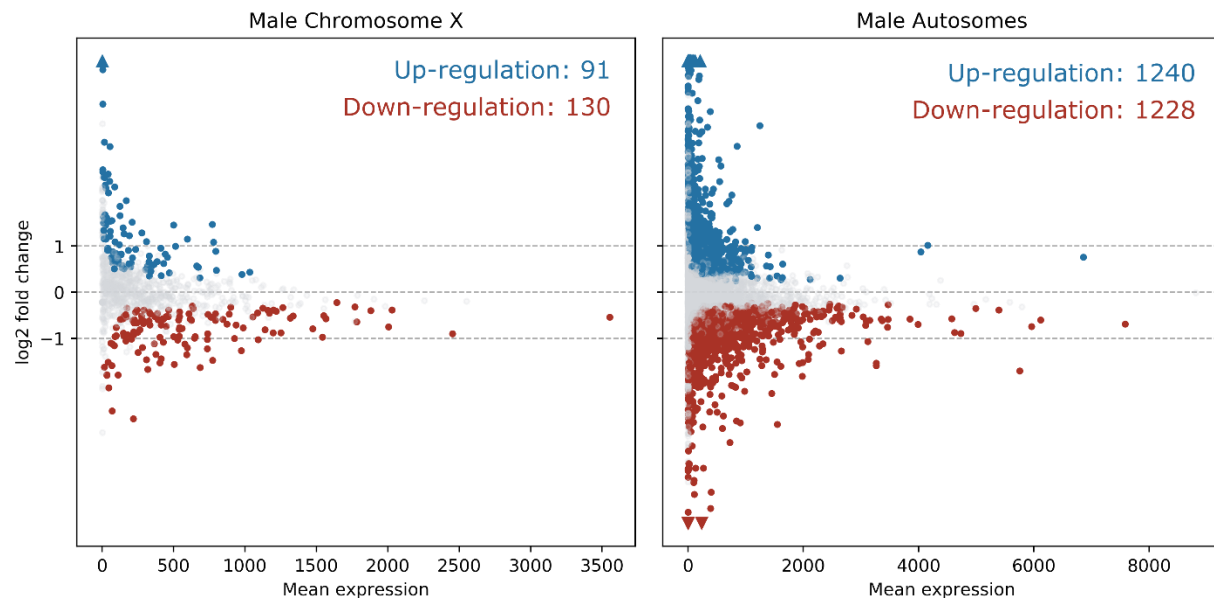

**Figure 2-figure supplement 1. X-linked genes are up-regulated in *Guy1* transgenic females from line *nGuy1\_1*.** MA Plots show differentially expressed genes on the X chromosome and the autosomes in A) *Guy1* transgenic females compared to non-transgenic female siblings, and B) *Guy1* transgenic males compared to non-transgenic male siblings. Each dot represents one gene. Blue dots denote up-regulated genes, red dots denote down-regulated genes, and grey dots are not differentially expressed (BH-adjusted  $p > 0.1$ ). Colored arrows indicate values beyond the range of the plot. Genes are significantly up-regulated on the X chromosome in transgenic females compared to up-regulated genes on the autosomes (A), which is supported by a Chi-square test ( $p = 2.20e^{-16}$ ), compared to males (B) ( $p = 2.17e^{-2}$ ) (see Supplementary File S5).
