# Supplementary material for: Guy1, a Y-linked embryonic signal, regulates dosage compensation in Anopheles stephensi by increasing X gene expression
Source: eLife journal article supplement (doi:10.7554/elife.43570), 2019-03-19
Supplement: supp [file elife-43570-supp-v1.zip › elife_poa_e43570_Supplementary_file_4.xlsx]

## Sheet: 1_nGuy1_2-TF vs WF
Gene	baseMean	log2FoldChange	lfcSE	stat	pvalue	padj	Chromosome
ASTEI00001	219.411	-0.232474	0.203324	-1.14337	0.252887	0.44996	2R
ASTEI00002	1995.92	0.483505	0.151612	3.18909	0.00142721	0.0079364	2R
ASTEI000020	667.302	0.777899	0.116725	6.66439	2.65762e-11	8.04347e-10	2R
ASTEI00003	508.16	-0.0466035	0.152717	-0.305163	0.760242	0.866568	2R
ASTEI00004	442.962	-0.115951	0.200545	-0.578178	0.563144	0.735791	2R
ASTEI00005	1226.36	-0.0882148	0.17627	-0.500453	0.616756	0.776417	2R
ASTEI00006	400.319	0.505963	0.131763	3.83994	0.000123064	0.000963131	2R
ASTEI00008	517.202	-0.0682544	0.122177	-0.558652	0.576399	0.745753	2R
ASTEI00009	196.686	0.405626	0.195997	2.06955	0.0384945	0.116476	2R
ASTEI00010	55.6158	-0.772523	0.267138	-2.89185	0.00382986	0.0178901	2R
ASTEI00011	0.30954	0.295097	3.75146	0.078662	0.937301	NA	2R
ASTEI00012	58.2272	-0.309512	0.30553	-1.01303	0.311044	0.513051	2R
ASTEI00013	1125.84	-0.727485	0.15215	-4.78136	1.74116e-06	2.22615e-05	2R
ASTEI00014	519.583	0.135367	0.200898	0.673809	0.500433	0.68723	2R
ASTEI00015	178.999	0.00801571	0.169289	0.0473494	0.962235	0.97985	2R
ASTEI00016	1748.44	0.149337	0.130338	1.14577	0.251889	0.449065	2R
ASTEI00017	141.99	-0.368898	0.193376	-1.90767	0.0564333	0.156382	2R
ASTEI00018	469.813	0.0802121	0.203607	0.393955	0.693614	0.827295	2R
ASTEI00019	823.025	0.104078	0.134916	0.771427	0.440454	0.639949	2R
ASTEI00020	281.529	0.199807	0.164516	1.21451	0.224553	0.416228	2R
ASTEI00021	224.266	-0.42419	0.149901	-2.82981	0.00465763	0.0210708	2R
ASTEI00022	199.153	-0.0462597	0.154267	-0.299868	0.764278	0.868457	2R
ASTEI00023	360.072	-0.0659809	0.121977	-0.540929	0.588556	0.755282	2R
ASTEI00024	44.6584	0.114439	0.294295	0.388859	0.69738	0.829781	2R
ASTEI00025	156.255	-0.488251	0.235981	-2.06903	0.0385434	0.116569	2R
ASTEI00026	0.586718	0.35297	2.71294	0.130106	0.896482	0.943743	2R
ASTEI00027	2.76666	1.56888	1.10469	1.4202	0.155548	0.324942	2R
ASTEI00028	4.16551	-0.951936	0.985182	-0.966254	0.333917	0.537791	2R
ASTEI00029	8.02916	-0.752255	0.651106	-1.15535	0.247948	0.443877	2R
ASTEI00030	819.594	-0.505409	0.121456	-4.16124	3.16519e-05	0.000292415	2R
ASTEI00031	1037.23	-0.59908	0.109925	-5.44989	5.04019e-08	8.86189e-07	2R
ASTEI00032	341.294	-0.280728	0.146528	-1.91586	0.0553833	0.154024	2R
ASTEI00033	1233.65	-0.121072	0.148941	-0.812883	0.416285	0.616393	2R
ASTEI00034	390.999	-0.258828	0.134838	-1.91956	0.0549138	0.153065	2R
ASTEI00035	533.549	0.179024	0.112751	1.58778	0.112335	0.257863	2R
ASTEI00036	988.611	0.340112	0.18231	1.86557	0.0621011	0.168591	2R
ASTEI00037	418.094	-0.0890122	0.131393	-0.677452	0.498119	0.686406	2R
ASTEI00038	521.934	-0.00305167	0.171272	-0.0178177	0.985784	0.992875	2R
ASTEI00039	423.727	-0.156557	0.153737	-1.01835	0.308513	0.510529	2R
ASTEI00040	251.859	-0.133849	0.162272	-0.824844	0.40946	0.61105	2R
ASTEI00041	252.14	-0.258044	0.145186	-1.77733	0.0755132	0.193734	2R
ASTEI00042	1423.04	0.584611	0.188972	3.09363	0.00197721	0.0104261	2R
ASTEI00043	10.0092	0.0341187	0.584982	0.0583244	0.95349	0.974794	2R
ASTEI00044	37.2047	0.452166	0.304176	1.48653	0.13714	0.297337	2R
ASTEI00045	711.313	0.568233	0.143511	3.95951	7.51046e-05	0.000626608	2R
ASTEI00046	1629.7	-0.132286	0.0993521	-1.33149	0.183029	0.362256	2R
ASTEI00047	782.411	-0.0610359	0.126743	-0.481571	0.630111	0.785698	2R
ASTEI00048	1595.26	0.174226	0.102208	1.70463	0.0882639	0.217239	2R
ASTEI00049	777.387	-0.0281453	0.134096	-0.209888	0.833755	0.907464	2R
ASTEI00050	277.385	-0.129751	0.13214	-0.981915	0.326142	0.529253	2R
ASTEI00051	0.308464	-1.47871	3.76667	-0.392578	0.694631	NA	2R
ASTEI00052	191.413	0.103987	0.19994	0.520092	0.602999	0.766662	2R
ASTEI00053	176.177	0.0782991	0.203931	0.383949	0.701016	0.83193	2R
ASTEI00054	619.546	-0.0133769	0.241423	-0.0554085	0.955813	0.97631	2R
ASTEI00055	1396.2	-0.336177	0.107612	-3.12398	0.00178425	0.00955914	2R
ASTEI00056	338.383	0.0593332	0.16026	0.37023	0.711211	0.837796	2R
ASTEI00057	988.066	0.246285	0.120453	2.04465	0.0408893	0.122132	2R
ASTEI00058	666.943	-0.17387	0.115597	-1.5041	0.132555	0.290562	2R
ASTEI00059	1183.76	0.0364222	0.127393	0.285905	0.774951	0.874585	2R
ASTEI00060	3411.28	0.133408	0.08972	1.48693	0.137033	0.297181	2R
ASTEI00061	152.214	0.652922	0.209183	3.12129	0.00180059	0.00962135	2R
ASTEI00062	188.346	-0.434789	0.157447	-2.7615	0.00575364	0.0249785	2R
ASTEI00063	75.4729	0.0611653	0.282981	0.216146	0.828874	0.904343	2R
ASTEI00064	46.3714	0.118929	0.337473	0.35241	0.724531	0.844834	2R
ASTEI00065	31.3273	-0.348977	0.407189	-0.857038	0.391424	0.594735	2R
ASTEI00066	557.669	0.287668	0.143605	2.00319	0.0451573	0.132263	2R
ASTEI00067	379.725	-0.682778	0.199223	-3.4272	0.000609833	0.00385866	2R
ASTEI00068	292.465	-0.246716	0.216971	-1.13709	0.2555	0.452863	2R
ASTEI00069	4.8999	0.294133	1.36065	0.21617	0.828855	0.904343	2R
ASTEI00070	3.33111	1.36789	1.32465	1.03264	0.301773	0.50362	2R
ASTEI00071	9.8482	0.308828	0.597322	0.517021	0.605142	0.767719	2R
ASTEI00072	588.41	-0.003841	0.151573	-0.025341	0.979783	0.989747	2R
ASTEI00073	2.58544	2.82682	1.35292	2.08942	0.0366696	0.112388	2R
ASTEI00074	421.898	0.806484	0.213081	3.78488	0.000153783	0.00117352	2R
ASTEI00075	596.367	-0.249438	0.143143	-1.74258	0.0814076	0.20461	2R
ASTEI00076	8.7013	1.57849	0.807737	1.95421	0.0506766	0.144389	2R
ASTEI00077	19.6999	-0.368035	0.462897	-0.795069	0.426573	0.626183	2R
ASTEI00078	109.804	0.230071	0.210715	1.09186	0.274894	0.474431	2R
ASTEI00079	716.147	0.141045	0.114396	1.23295	0.217595	0.407688	2R
ASTEI00080	395.596	0.0674522	0.190478	0.35412	0.723249	0.844772	2R
ASTEI00081	57.6022	-0.0431565	0.267193	-0.161518	0.871685	0.928808	2R
ASTEI00082	106.941	-0.108899	0.248195	-0.438762	0.660834	0.805525	2R
ASTEI00083	280.776	-0.180835	0.14926	-1.21154	0.225687	0.417399	2R
ASTEI00084	65.4277	-1.28829	0.25148	-5.12283	3.00976e-07	4.54278e-06	2R
ASTEI00085	410.112	-0.573465	0.206593	-2.77583	0.00550616	0.0241118	2R
ASTEI00086	1217.14	-0.0589774	0.164907	-0.35764	0.720613	0.84357	2R
ASTEI00087	1152.04	0.0431285	0.181985	0.23699	0.812665	0.894308	2R
ASTEI00088	1205.65	0.0426748	0.154211	0.27673	0.781987	0.877414	2R
ASTEI00089	1239.86	-0.326932	0.169446	-1.92942	0.0536792	0.150608	2R
ASTEI00090	1272.08	0.142952	0.174053	0.821314	0.411468	0.612504	2R
ASTEI00091	225.442	-0.806048	0.15493	-5.20267	1.96451e-07	3.0937e-06	2R
ASTEI00092	507.961	0.00649759	0.179711	0.0361557	0.971158	0.984715	2R
ASTEI00093	266.34	0.327285	0.194526	1.68247	0.0924774	0.223864	2R
ASTEI00094	1330.85	-1.73591	0.177719	-9.76771	1.54914e-22	1.46375e-20	2R
ASTEI00095	142.312	-0.218548	0.253347	-0.862643	0.388334	0.591975	2R
ASTEI00096	125.378	0.706255	0.286295	2.46688	0.0136297	0.0506895	2R
ASTEI00097	88.1308	-0.273373	0.231966	-1.1785	0.238596	0.432667	2R
ASTEI00098	140.27	0.422547	0.221983	1.90351	0.0569742	0.157543	2R
ASTEI00099	1635.61	0.147344	0.135648	1.08622	0.277381	0.476741	2R
ASTEI00100	691.638	0.532136	0.13548	3.92779	8.57317e-05	0.000704151	2R
ASTEI00101	3.98191	0.695828	1.12384	0.61915	0.535818	0.715943	2R
ASTEI00102	6.97871	-0.349636	0.711908	-0.491125	0.623338	0.78124	2R
ASTEI00103	230.159	-0.420305	0.231237	-1.81764	0.0691197	0.181703	2R
ASTEI00104	438.347	0.533509	0.225094	2.37016	0.0177806	0.0627532	2R
ASTEI00105	49.7662	-0.148624	0.384052	-0.386989	0.698764	0.830881	2R
ASTEI00106	56.3963	-0.336787	0.398483	-0.845173	0.398014	0.600881	2R
ASTEI00107	1038.07	0.0318935	0.172155	0.18526	0.853025	0.918885	2R
ASTEI00108	6.37597	0.659644	0.748157	0.881693	0.377943	0.582359	2R
ASTEI00109	243.704	-0.193408	0.165181	-1.17089	0.241643	0.435474	2R
ASTEI00110	417.993	0.256314	0.154359	1.6605	0.096814	0.231491	2R
ASTEI00111	462.38	0.740028	0.160205	4.61926	3.85115e-06	4.51645e-05	2R
ASTEI00112	146.445	-0.133154	0.242426	-0.549259	0.582828	0.75104	2R
ASTEI00113	1190.81	-0.155831	0.143783	-1.08379	0.278457	0.477742	2R
ASTEI00114	602.869	-0.209436	0.22722	-0.921732	0.356668	0.561908	2R
ASTEI00115	171.155	0.315804	0.211638	1.49219	0.135649	0.295062	2R
ASTEI00116	37.5809	-0.97378	0.435182	-2.23764	0.0252446	0.083303	2R
ASTEI00117	640.336	0.108545	0.234475	0.462929	0.643415	0.794578	2R
ASTEI00118	296.416	-0.363525	0.155739	-2.3342	0.0195854	0.0680075	2R
ASTEI00119	99.0339	-0.607635	0.208873	-2.90912	0.00362449	0.0171235	2R
ASTEI00120	799.883	0.0405484	0.120888	0.33542	0.737308	0.851604	2R
ASTEI00121	4901.17	-0.186599	0.108329	-1.72252	0.084976	0.211385	2R
ASTEI00122	625.947	-0.384549	0.161018	-2.38824	0.0169293	0.0604275	2R
ASTEI00123	652.188	-0.0252771	0.186021	-0.135883	0.891914	0.940637	2R
ASTEI00124	135.115	0.267163	0.202051	1.32226	0.186083	0.366118	2R
ASTEI00125	1398.37	0.0173632	0.135194	0.128432	0.897807	0.944368	2R
ASTEI00126	237.451	0.232573	0.173167	1.34306	0.179253	0.356909	2R
ASTEI00127	884.114	0.467527	0.182382	2.56345	0.0103639	0.040528	2R
ASTEI00128	1475.57	0.0191324	0.128671	0.148693	0.881796	0.935058	2R
ASTEI00129	201.463	0.297433	0.202496	1.46883	0.141878	0.304003	2R
ASTEI00130	300.022	0.246667	0.152807	1.61423	0.106477	0.248199	2R
ASTEI00131	37.6799	-0.362452	0.305513	-1.18637	0.235476	0.428815	2R
ASTEI00132	959.744	-0.00332962	0.106348	-0.0313088	0.975023	0.987396	2R
ASTEI00133	1.23947	0.800257	1.74721	0.458019	0.646939	0.796475	2R
ASTEI00134	0.445415	-2.04502	3.31558	-0.616791	0.537372	NA	2R
ASTEI00135	2.2311	0.51995	1.21745	0.427083	0.669319	0.810885	2R
ASTEI00136	49.1204	-0.0155728	0.301743	-0.0516093	0.95884	0.978199	2R
ASTEI00137	120.378	-0.150929	0.235859	-0.639914	0.522229	0.704427	2R
ASTEI00138	448.331	0.194125	0.157153	1.23526	0.216733	0.406336	2R
ASTEI00139	246.068	-2.22421	0.226445	-9.82228	9.02767e-23	8.59997e-21	2R
ASTEI00140	878.873	0.179668	0.147622	1.21708	0.223574	0.415276	2R
ASTEI00141	745.925	0.0861987	0.149876	0.575131	0.565202	0.737137	2R
ASTEI00142	375.995	-0.636695	0.157465	-4.04341	5.26801e-05	0.000455203	2R
ASTEI00143	1311.95	-0.0324839	0.129779	-0.250302	0.802353	0.888429	2R
ASTEI00144	22.6303	0.263309	0.40466	0.650692	0.515245	0.699309	2R
ASTEI00145	8.73747	0.400349	0.62472	0.640846	0.521623	0.703936	2R
ASTEI00146	17.8635	0.487213	0.513617	0.948591	0.342828	0.54784	2R
ASTEI00147	11.2426	0.122999	0.596419	0.206229	0.836612	0.909041	2R
ASTEI00148	10.5762	0.303292	0.837046	0.362336	0.717101	0.841663	2R
ASTEI00149	1074.33	-2.01771	0.751794	-2.68386	NA	NA	2R
ASTEI00150	5167.31	-1.16131	0.127238	-9.12703	7.04056e-20	5.31334e-18	2R
ASTEI00151	293.528	0.266982	0.146766	1.8191	0.0688962	0.181197	2R
ASTEI00152	477.972	-0.429441	0.15763	-2.72436	0.00644271	0.0275182	2R
ASTEI00153	84.8773	-0.961417	0.231227	-4.15789	3.21205e-05	0.0002961	2R
ASTEI00154	1118.38	-0.159155	0.100725	-1.5801	0.114085	0.260848	2R
ASTEI00155	143.833	-0.861668	0.27052	-3.18523	0.00144637	0.00802755	2R
ASTEI00156	217.455	-0.578307	0.156058	-3.70572	0.000210791	0.0015466	2R
ASTEI00157	151.456	-0.229066	0.239294	-0.957256	0.338438	0.543127	2R
ASTEI00158	25.254	-0.221766	0.402844	-0.550501	0.581976	0.750191	2R
ASTEI00159	254.298	0.109918	0.140083	0.784659	0.432654	0.632923	2R
ASTEI00160	182.213	-0.162248	0.242643	-0.66867	0.503706	0.689688	2R
ASTEI00161	575.542	-0.30047	0.160799	-1.8686	0.0616782	0.167835	2R
ASTEI00162	1908.52	0.277497	0.0918463	3.02132	0.00251674	0.0126951	2R
ASTEI00163	144.24	-0.530722	0.2036	-2.60669	0.00914228	0.036588	2R
ASTEI00164	548.125	0.00841514	0.17626	0.0477429	0.961921	0.979794	2R
ASTEI00165	801.491	0.184555	0.176648	1.04476	0.296133	0.497349	2R
ASTEI00166	885.239	-0.29857	0.158532	-1.88334	0.0596546	0.163284	2R
ASTEI00167	341.339	-0.0309368	0.166758	-0.18552	0.852822	0.918752	2R
ASTEI00168	1472.02	2.69475	0.179554	15.0081	6.50263e-51	3.28581e-48	2R
ASTEI00169	224.84	-0.402981	0.15447	-2.60879	0.00908624	0.0364139	2R
ASTEI00170	95.9796	2.42025	0.288495	8.38922	4.89387e-17	2.81567e-15	2R
ASTEI00171	7.19996	-0.543927	0.836478	-0.650259	0.515525	0.69947	2R
ASTEI00172	226.051	0.180595	0.171737	1.05158	0.292993	0.494363	2R
ASTEI00173	28.0708	0.288792	0.459203	0.628898	0.529416	0.711068	2R
ASTEI00174	1.93942	-0.350309	1.25994	-0.278035	0.780985	0.876967	2R
ASTEI00175	819.276	0.50599	0.172478	2.93365	0.00335004	0.0160421	2R
ASTEI00176	1205.08	-0.107874	0.15918	-0.677685	0.497971	0.686283	2R
ASTEI00177	20.795	-0.843457	0.589263	-1.43138	0.152322	0.320473	2R
ASTEI00178	8.94333	-0.125897	0.617983	-0.203722	0.83857	0.910144	2R
ASTEI00179	248.444	0.567753	0.189267	2.99975	0.00270203	0.0134546	2R
ASTEI00180	363.021	-0.144665	0.146202	-0.989492	0.322423	0.525554	2R
ASTEI00181	1402.74	0.266281	0.104987	2.53632	0.0112023	0.0432249	2R
ASTEI00182	397.646	0.446256	0.133653	3.33892	0.000841058	0.00507253	2R
ASTEI00183	470.55	0.389833	0.160519	2.42858	0.015158	0.0552594	2R
ASTEI00184	196.688	-0.345729	0.196094	-1.76307	0.0778882	0.198208	2R
ASTEI00185	2834.06	0.0661071	0.118128	0.559621	0.575738	0.745291	2R
ASTEI00186	169.362	-0.267744	0.170385	-1.5714	0.116089	0.264081	2R
ASTEI00187	427.415	-0.152464	0.168523	-0.904708	0.36562	0.570214	2R
ASTEI00188	9.47759	1.32107	0.663697	1.99048	0.0465385	0.135251	2R
ASTEI00189	323.563	0.0535843	0.214835	0.249421	0.803035	0.889015	2R
ASTEI00190	5.76829	-0.616494	0.945913	-0.651745	0.514565	0.698728	2R
ASTEI00191	15.5172	0.18615	0.579804	0.321057	0.748167	0.859403	2R
ASTEI00192	5.03232	0.383295	0.856903	0.447302	0.654657	0.802056	2R
ASTEI00193	467.132	0.148736	0.157074	0.946917	0.343681	0.548524	2R
ASTEI00194	136.74	0.142197	0.247748	0.573958	0.565996	0.737776	2R
ASTEI00195	19.7437	-0.192143	0.424142	-0.453015	0.650538	0.799044	2R
ASTEI00196	6.56131	0.326848	0.819061	0.399052	0.689855	0.824676	2R
ASTEI00197	4058.22	-0.606865	0.15364	-3.94991	7.81818e-05	0.000649021	2R
ASTEI00198	106.387	-0.131785	0.204066	-0.645797	0.518411	0.701721	2R
ASTEI00199	514.08	-0.450872	0.131834	-3.41999	0.00062623	0.0039426	2R
ASTEI00200	583.115	-0.0650435	0.169157	-0.384515	0.700597	0.831761	2R
ASTEI00201	188.6	2.97937	0.191044	15.5952	7.85217e-55	6.08386e-52	2R
ASTEI00202	27.5568	-0.261531	0.502691	-0.520261	0.602882	0.76661	2R
ASTEI00203	688.273	-0.517339	0.209314	-2.47159	0.0134513	0.0502349	2R
ASTEI00204	86.8109	0.259668	0.305677	0.849486	0.395611	0.598437	2R
ASTEI00205	17.6549	0.314117	0.489786	0.641336	0.521305	0.70367	2R
ASTEI00206	12.1812	-0.216019	0.604653	-0.357261	0.720896	0.843687	2R
ASTEI00207	4.28362	-1.87056	0.990614	-1.88828	0.0589878	0.161917	2R
ASTEI00208	0.806213	1.51372	2.42286	0.624765	0.532125	0.713046	2R
ASTEI00209	360.153	0.381793	0.178622	2.13743	0.0325631	0.101953	2R
ASTEI00210	653.04	0.13055	0.15192	0.859334	0.390156	0.593896	2R
ASTEI00211	484.083	-0.220144	0.158724	-1.38696	0.165453	0.338003	2R
ASTEI00212	3543.4	0.161861	0.110806	1.46076	0.144083	0.307705	2R
ASTEI00213	303.625	-0.0913228	0.177633	-0.51411	0.607175	0.768706	2R
ASTEI00214	904.227	0.122891	0.400102	0.30715	0.758729	0.865354	2R
ASTEI00215	316.854	-0.519826	0.149161	-3.485	0.00049214	0.00322234	2R
ASTEI00216	315.964	-0.164767	0.146997	-1.12089	0.262335	0.460571	2R
ASTEI00217	120.2	-0.651123	0.253013	-2.57347	0.0100683	0.0396658	2R
ASTEI00218	293.301	-0.286736	0.137966	-2.07831	0.0376811	0.114882	2R
ASTEI002180	190.257	-0.162269	0.207284	-0.78283	0.433727	0.634059	2R
ASTEI002184	1.92751	0.11657	1.4183	0.0821905	0.934495	0.965219	2R
ASTEI00219	418.647	-0.172976	0.124559	-1.3887	0.164923	0.337393	2R
ASTEI00220	295.569	-0.0135174	0.151405	-0.0892797	0.92886	0.962654	2R
ASTEI00221	243.141	-0.379767	0.142021	-2.67401	0.00749492	0.0311649	2R
ASTEI00222	2931.23	-0.0681711	0.0976579	-0.698061	0.485139	0.676216	2R
ASTEI00224	1636.09	-0.0246711	0.117789	-0.209452	0.834096	0.907582	2R
ASTEI00225	5.24856	0.0843868	0.877409	0.0961773	0.92338	0.959044	2R
ASTEI00227	96.0547	-0.479173	0.238218	-2.01149	0.0442737	0.130197	2R
ASTEI00228	456.964	-0.063237	0.121145	-0.521994	0.601675	0.765816	2R
ASTEI00229	20.8642	-0.582591	0.692551	-0.841224	0.400222	0.60275	2R
ASTEI00230	456.137	-0.349957	0.168957	-2.07128	0.0383328	0.116196	2R
ASTEI00231	873.794	-0.84417	0.120064	-7.03101	2.05046e-12	7.22134e-11	2R
ASTEI00232	784.964	0.142684	0.109711	1.30054	0.193415	0.375459	2R
ASTEI00233	842.571	0.0018596	0.149128	0.0124698	0.990051	0.994688	2R
ASTEI00234	1175.38	-0.134326	0.116036	-1.15762	0.247018	0.442691	2R
ASTEI00235	935.862	0.520699	0.107945	4.82375	1.40884e-06	1.85012e-05	2R
ASTEI00236	532.811	0.335783	0.15602	2.15218	0.031383	0.0989778	2R
ASTEI00237	177.088	-0.495217	0.18633	-2.65773	0.00786681	0.0324789	2R
ASTEI00238	1248.46	-0.249372	0.107474	-2.32031	0.0203242	0.0700914	2R
ASTEI00239	245.703	-0.225159	0.169571	-1.32782	0.184239	0.36362	2R
ASTEI00240	446.735	-0.190042	0.132755	-1.43152	0.152281	0.320444	2R
ASTEI00241	535.874	0.0765208	0.149855	0.510631	0.609609	0.770448	2R
ASTEI00242	353.577	-0.146984	0.198027	-0.742239	0.457943	0.654558	2R
ASTEI00243	637.074	0.0680201	0.116349	0.58462	0.558803	0.731866	2R
ASTEI00244	2.58054	-1.36105	1.26039	-1.07987	0.280201	0.479601	2R
ASTEI00245	3.54937	1.08331	1.06966	1.01276	0.311176	0.513122	2R
ASTEI00246	19.8576	-0.279281	0.487762	-0.572577	0.566931	0.738663	2R
ASTEI00247	97.4182	-0.0470862	0.242052	-0.19453	0.845761	0.914281	2R
ASTEI00248	115.507	0.0362575	0.211099	0.171756	0.86363	0.923972	2R
ASTEI00249	236.226	0.0413044	0.151151	0.273266	0.784648	0.879297	2R
ASTEI00250	697.432	-0.352539	0.132733	-2.65599	0.00790754	0.0326007	2R
ASTEI00251	247.332	0.0489869	0.154487	0.317093	0.751173	0.8613	2R
ASTEI00252	132.458	-0.107971	0.181831	-0.593801	0.552646	0.727801	2R
ASTEI00253	693.399	0.123616	0.123412	1.00165	0.316512	0.518683	2R
ASTEI00254	141.903	0.749805	0.180269	4.15936	3.19137e-05	0.0002946	2R
ASTEI00255	1260.04	0.0375602	0.116029	0.323713	0.746155	0.857881	2R
ASTEI00256	1902.55	0.616848	0.129257	4.77227	1.82163e-06	2.31377e-05	2R
ASTEI00257	147.81	0.57343	0.272929	2.10102	0.035639	0.109954	2R
ASTEI00258	859.195	-0.230811	0.205614	-1.12254	0.261631	0.460094	2R
ASTEI00259	188.982	0.220386	0.15178	1.45201	0.146498	0.311717	2R
ASTEI00260	345.153	0.233042	0.160367	1.45318	0.146175	0.311372	2R
ASTEI00261	469.823	-0.0169706	0.256533	-0.0661537	0.947255	0.971961	2R
ASTEI00262	110.392	-0.141932	0.38077	-0.372748	0.709336	0.837199	2R
ASTEI00263	359.322	0.190302	0.164996	1.15337	0.248758	0.444985	2R
ASTEI00264	314.879	-0.111265	0.138036	-0.806053	0.420212	0.620548	2R
ASTEI00265	264.522	-0.30062	0.189245	-1.58852	0.112168	0.257683	2R
ASTEI00266	403.035	0.388513	0.197868	1.9635	0.0495883	0.142054	2R
ASTEI00267	896.567	-0.0908016	0.148711	-0.610592	0.54147	0.720594	2R
ASTEI00268	590.884	-0.16317	0.190446	-0.856783	0.391565	0.594872	2R
ASTEI00269	305.828	0.113763	0.146611	0.775951	0.437778	0.63732	2R
ASTEI00270	3.90667	-0.803297	1.03289	-0.777715	0.436737	0.636611	2R
ASTEI00271	2992.01	0.377985	0.100124	3.77516	0.000159903	0.00121463	2R
ASTEI00272	246.041	-0.131056	0.165549	-0.791645	0.428568	0.628653	2R
ASTEI00273	204.813	0.0938094	0.153737	0.610195	0.541733	0.720698	2R
ASTEI00274	339.419	0.198271	0.16108	1.23089	0.218365	0.408537	2R
ASTEI00275	745.369	-0.0134215	0.146265	-0.0917613	0.926888	0.961211	2R
ASTEI00276	94.9425	0.0984844	0.258937	0.380341	0.703693	0.833756	2R
ASTEI00277	643.135	-0.296277	0.121931	-2.42988	0.0151037	0.055113	2R
ASTEI00278	751.281	-0.123397	0.1503	-0.821005	0.411644	0.612554	2R
ASTEI00279	15.0797	-1.74959	0.528844	-3.30832	0.000938563	0.00557953	2R
ASTEI00280	1.0634	-0.199704	1.82518	-0.109416	0.912872	0.953054	2R
ASTEI00281	36.8048	0.370422	0.350011	1.05832	0.289912	0.490373	2R
ASTEI00282	38.639	0.617146	0.326285	1.89143	0.0585665	0.161065	2R
ASTEI00283	546.158	0.241559	0.146986	1.64342	0.100297	0.237542	2R
ASTEI00284	1207.31	0.50238	0.136921	3.66911	0.000243393	0.00175806	2R
ASTEI00285	30.9014	0.339437	0.373871	0.907898	0.363932	0.568734	2R
ASTEI00286	251.031	-1.87666	0.2153	-8.71651	2.86909e-18	1.85247e-16	2R
ASTEI00287	8.55296	-0.655133	0.756138	-0.86642	0.38626	0.590093	2R
ASTEI00288	282.125	-0.337495	0.158072	-2.13507	0.0327555	0.102472	2R
ASTEI00289	2437.05	-0.059492	0.166725	-0.356827	0.721221	0.843687	2R
ASTEI00290	179.414	-0.57901	0.191505	-3.02348	0.00249889	0.012616	2R
ASTEI00291	300.552	0.512775	0.162466	3.15619	0.00159846	0.00872171	2R
ASTEI00292	962.965	-0.0783341	0.103937	-0.753668	0.451049	0.648854	2R
ASTEI00293	20.6673	0.521266	0.432664	1.20478	0.228288	0.420402	2R
ASTEI00294	54.4218	0.411771	0.299663	1.37411	0.169406	0.343547	2R
ASTEI00295	2.04789	0.842916	1.24322	0.678012	0.497764	0.686146	2R
ASTEI00296	385.271	0.291412	0.174522	1.66978	0.0949638	0.227937	2R
ASTEI00297	686.961	-0.139158	0.116055	-1.19907	0.230501	0.422669	2R
ASTEI00298	291.986	0.380943	0.152763	2.49368	0.0126427	0.0477165	2R
ASTEI00299	3294.72	-0.029868	0.117569	-0.254046	0.79946	0.887593	2R
ASTEI00300	229.987	-0.425809	0.19235	-2.21373	0.0268477	0.0873772	2R
ASTEI00301	624.685	0.0746332	0.133754	0.55799	0.576851	0.746233	2R
ASTEI00302	263.64	0.341054	0.156538	2.17873	0.0293518	0.0938525	2R
ASTEI00303	168.032	1.88124	0.201993	9.3134	1.23803e-20	9.99196e-19	2R
ASTEI00304	50.9335	-0.524698	0.467814	-1.12159	0.262035	0.460304	2R
ASTEI00305	22.1129	-1.60296	0.643051	-2.49274	0.0126762	0.047801	2R
ASTEI00306	1391.75	0.0958362	0.137125	0.698895	0.484617	0.675813	2R
ASTEI00309	46.3603	-0.456829	0.371637	-1.22923	0.218984	0.409301	2R
ASTEI00310	66.8759	-1.69459	0.273289	-6.20071	5.62081e-10	1.38694e-08	2R
ASTEI00311	353.648	-0.626904	0.183387	-3.41848	0.000629724	0.00395817	2R
ASTEI00312	1369.92	-0.917277	0.225787	-4.06259	4.8532e-05	0.000423135	2R
ASTEI00313	105.542	-0.0581364	0.209215	-0.277878	0.781106	0.877018	2R
ASTEI00314	138.67	-0.432562	0.209641	-2.06335	0.0390795	0.117939	2R
ASTEI00315	245.66	0.162949	0.205226	0.793996	0.427198	0.62688	2R
ASTEI00316	589.389	-0.294123	0.115278	-2.55141	0.0107288	0.0416606	2R
ASTEI00317	320.878	-0.145283	0.229715	-0.632447	0.527095	0.708742	2R
ASTEI00318	288.799	-0.0555816	0.159149	-0.349242	0.726907	0.846166	2R
ASTEI00319	321.932	-0.67195	0.153156	-4.38736	1.14736e-05	0.000119486	2R
ASTEI00320	309.797	-0.064044	0.184612	-0.346911	0.728658	0.847144	2R
ASTEI00321	1881.85	-0.00725533	0.117705	-0.0616402	0.950849	0.973636	2R
ASTEI00322	425.57	-0.168293	0.224392	-0.749995	0.453258	0.650602	2R
ASTEI00323	621.006	-0.20762	0.12083	-1.71828	0.0857454	0.212707	2R
ASTEI00324	170.809	-0.419539	0.250015	-1.67806	0.0933362	0.225333	2R
ASTEI00325	343.449	-0.908071	0.135172	-6.71789	1.84376e-11	5.74482e-10	2R
ASTEI00326	72.3065	-1.86828	0.308175	-6.06242	1.3409e-09	3.12303e-08	2R
ASTEI00327	943.029	0.00381713	0.1135	0.033631	0.973171	0.98624	2R
ASTEI00328	17.3793	-0.856418	0.498501	-1.71799	0.0857991	0.212795	2R
ASTEI00329	510.437	0.411666	0.162589	2.53194	0.0113433	0.0436386	2R
ASTEI00330	162.625	-0.168715	0.187204	-0.90124	0.367461	0.572087	2R
ASTEI00331	644.807	-0.0869045	0.155925	-0.557347	0.57729	0.746469	2R
ASTEI00332	256.087	0.150014	0.137655	1.08978	0.275809	0.475163	2R
ASTEI00333	14.6513	-1.91142	0.640324	-2.98508	0.00283506	0.0140209	2R
ASTEI00334	316.021	0.649254	0.190051	3.4162	0.000635008	0.00398707	2R
ASTEI00335	266.843	-0.526086	0.151954	-3.46215	0.000535874	0.00345612	2R
ASTEI00336	1033.45	0.211235	0.109218	1.93407	0.0531041	0.149473	2R
ASTEI00337	772.552	-0.121699	0.11488	-1.05936	0.289436	0.489711	2R
ASTEI00338	312.052	-0.315961	0.130023	-2.43005	0.0150969	0.0551056	2R
ASTEI00339	403.092	-0.251884	0.124236	-2.02747	0.0426142	0.12623	2R
ASTEI00340	267.618	-0.196833	0.163193	-1.20614	0.227765	0.419838	2R
ASTEI00341	266.883	-0.667315	0.138978	-4.80159	1.57408e-06	2.03719e-05	2R
ASTEI00342	71.4538	-0.00927999	0.256225	-0.0362181	0.971108	0.984715	2R
ASTEI00343	182.907	0.131156	0.184484	0.710935	0.477125	0.669622	2R
ASTEI00344	7.86092	0.735174	0.636284	1.15542	0.247919	0.443877	2R
ASTEI00345	473.695	-0.467135	0.160313	-2.9139	0.00356945	0.0168978	2R
ASTEI00346	143.691	0.596058	0.18847	3.16262	0.00156356	0.0085554	2R
ASTEI00347	0.449102	2.53853	3.72237	0.681966	0.495261	NA	2R
ASTEI00348	1.49559	-0.287507	1.43679	-0.200103	0.8414	0.912048	2R
ASTEI00349	2.18054	-0.538349	1.47258	-0.365582	0.714677	0.840166	2R
ASTEI00350	59.4558	-0.109308	0.283457	-0.385625	0.699775	0.831465	2R
ASTEI00351	547.72	-0.032367	0.115428	-0.280408	0.779164	0.876213	2R
ASTEI00352	226.689	-0.436916	0.165059	-2.64703	0.00812013	0.0332334	2R
ASTEI003524	744.179	-0.165098	0.173033	-0.954147	0.340009	0.544897	2R
ASTEI003525	706.298	-0.567201	0.198861	-2.85225	0.00434108	0.019863	2R
ASTEI003526	335.452	-0.569609	0.157916	-3.60705	0.000309695	0.00215714	2R
ASTEI003527	825.646	-0.429787	0.169267	-2.53911	0.0111136	0.0429539	2R
ASTEI00353	520.618	-0.163973	0.173911	-0.942857	0.345754	0.550761	2R
ASTEI00354	1204.01	-0.415526	0.108894	-3.81587	0.000135705	0.00105145	2R
ASTEI00355	674.401	-0.344826	0.154629	-2.23002	0.0257464	0.0845738	2R
ASTEI00356	715.26	-0.586068	0.190365	-3.07866	0.00207937	0.010837	2R
ASTEI00357	779.797	-0.0290846	0.180654	-0.160996	0.872096	0.929072	2R
ASTEI00362	121.427	-0.162391	0.195312	-0.831443	0.405723	0.607957	2R
ASTEI00363	39.0401	0.608904	0.323683	1.88117	0.0599484	0.163934	2R
ASTEI00364	290.772	-0.264856	0.174317	-1.51939	0.128665	0.28461	2R
ASTEI00365	880.887	0.195657	0.170936	1.14462	0.252366	0.449551	2R
ASTEI00366	1916.37	0.21467	0.12573	1.70739	0.0877489	0.216378	2R
ASTEI00367	1201.79	-0.236739	0.120677	-1.96175	0.0497916	0.142532	2R
ASTEI00368	151.021	-0.0916358	0.196592	-0.466122	0.641128	0.793187	2R
ASTEI00369	259.286	-0.288582	0.171668	-1.68104	0.0927542	0.224254	2R
ASTEI00370	122.279	0.103353	0.206214	0.501193	0.616235	0.776019	2R
ASTEI00371	457.529	-0.0775768	0.123995	-0.625647	0.531547	0.71289	2R
ASTEI00372	1095.09	-0.200024	0.138405	-1.44521	0.148399	0.314668	2R
ASTEI00373	245.952	0.220456	0.180449	1.22171	0.221819	0.412975	2R
ASTEI00374	563.646	-0.325952	0.200304	-1.62729	0.103677	0.243027	2R
ASTEI00375	65.0681	-0.412688	0.277777	-1.48568	0.137364	0.297732	2R
ASTEI00376	34.4116	-0.326602	0.407493	-0.801492	0.422847	0.623092	2R
ASTEI00377	12.278	0.00795282	0.572412	0.0138935	0.988915	0.994305	2R
ASTEI00378	122.518	-0.381416	0.200922	-1.89833	0.0576532	0.15908	2R
ASTEI00379	816.187	-0.266583	0.118794	-2.24408	0.0248275	0.0821002	2R
ASTEI00380	18.0318	1.13932	0.79047	1.44132	0.149495	0.3163	2R
ASTEI00381	631.728	-1.38443	0.172831	-8.01028	1.14448e-15	5.75806e-14	2R
ASTEI00382	385.959	-0.176258	0.127301	-1.38458	0.166181	0.338953	2R
ASTEI00383	208.316	-0.177871	0.160905	-1.10544	0.26897	0.46733	2R
ASTEI00384	1447.62	-0.57691	0.10808	-5.33778	9.40898e-08	1.5871e-06	2R
ASTEI00385	1504.65	-0.441227	0.100253	-4.40113	1.07687e-05	0.000112548	2R
ASTEI00386	520.955	-0.284978	0.137384	-2.07431	0.0380501	0.115703	2R
ASTEI00387	694.243	-0.0773311	0.135647	-0.570089	0.568617	0.74003	2R
ASTEI00388	769.443	-0.328267	0.110097	-2.98163	0.00286722	0.0141258	2R
ASTEI00389	764.391	0.00101524	0.122889	0.00826142	0.993408	0.99661	2R
ASTEI00390	679.651	0.132484	0.122087	1.08516	0.277853	0.477265	2R
ASTEI00391	403.798	-0.0737804	0.128167	-0.575661	0.564845	0.73677	2R
ASTEI00392	684.41	0.481308	0.118749	4.05314	5.05346e-05	0.000438293	2R
ASTEI00393	1737.4	-0.670161	0.130878	-5.1205	3.04722e-07	4.5874e-06	2R
ASTEI00394	281.417	0.231782	0.139765	1.65837	0.0972419	0.232349	2R
ASTEI00395	953.085	0.988413	0.137807	7.17245	7.36692e-13	2.6924e-11	2R
ASTEI00396	659.87	0.162589	0.129549	1.25503	0.209467	0.396616	2R
ASTEI00397	124.708	0.298939	0.224629	1.33081	0.183252	0.362635	2R
ASTEI00398	294.044	0.0836621	0.147685	0.566492	0.57106	0.742129	2R
ASTEI00399	132.291	-0.30293	0.189077	-1.60215	0.109123	0.252787	2R
ASTEI00400	88.0258	-0.264822	0.243124	-1.08925	0.276046	0.475263	2R
ASTEI00401	340.584	-0.0149661	0.130053	-0.115077	0.908384	0.950332	2R
ASTEI00402	313.89	0.003005	0.141648	0.0212146	0.983074	0.991607	2R
ASTEI00403	486.358	0.335427	0.11177	3.00104	0.00269061	0.0134207	2R
ASTEI00404	1736.66	0.512078	0.128496	3.98516	6.74345e-05	0.000567916	2R
ASTEI00406	294.841	0.160264	0.164481	0.97436	0.329878	0.53411	2R
ASTEI00407	1.83959	1.67176	1.36567	1.22413	0.220903	0.41163	2R
ASTEI00408	0.460143	-2.08689	3.28621	-0.635045	0.525399	NA	2R
ASTEI00409	122.095	-0.175662	0.22545	-0.779163	0.435884	0.636093	2R
ASTEI00410	383.684	-1.22238	0.206677	-5.91444	3.3301e-09	7.23409e-08	2R
ASTEI00411	75.0347	-0.0509373	0.23782	-0.214185	0.830403	0.905087	2R
ASTEI00412	283.744	0.120039	0.164512	0.729668	0.465593	0.660617	2R
ASTEI00413	380.127	0.218156	0.167143	1.30521	0.191823	0.373201	2R
ASTEI00414	170.576	0.0320885	0.221936	0.144584	0.885039	0.936617	2R
ASTEI00415	219.244	-0.19101	0.180421	-1.05869	0.289741	0.490155	2R
ASTEI00416	407.263	-0.106133	0.12552	-0.845543	0.397808	0.600821	2R
ASTEI00417	297.544	-0.320651	0.148323	-2.16185	0.03063	0.0971313	2R
ASTEI00418	411.445	0.461499	0.124953	3.69339	0.000221287	0.00161545	2R
ASTEI00419	119.214	0.241343	0.194661	1.23981	0.215045	0.404018	2R
ASTEI00420	567.949	0.0922161	0.139189	0.662524	0.507635	0.692857	2R
ASTEI00421	24.2654	-0.0930743	0.481338	-0.193366	0.846672	0.914936	2R
ASTEI00422	66.7056	0.0711484	0.266562	0.266912	0.789537	0.881966	2R
ASTEI00423	36.2562	-0.0963626	0.332015	-0.290236	0.771636	0.873324	2R
ASTEI00424	553.114	-2.14236	0.255187	-8.39526	4.64877e-17	2.68796e-15	2R
ASTEI00425	9.79299	-0.061384	0.594169	-0.103311	0.917716	0.955965	2R
ASTEI00426	28.8608	0.228005	0.409375	0.556958	0.577556	0.746569	2R
ASTEI00427	32.1755	0.147932	0.334093	0.442785	0.657921	0.803844	2R
ASTEI00428	1764.93	0.792052	0.158353	5.00181	5.67943e-07	8.08901e-06	2R
ASTEI00429	392.691	-0.0706066	0.147392	-0.479038	0.631911	0.787062	2R
ASTEI00430	1601.65	-2.04814	0.195634	-10.4693	1.19582e-25	1.37602e-23	2R
ASTEI00431	211.442	-0.53681	0.157124	-3.41646	0.000634406	0.00398544	2R
ASTEI00432	771.604	-0.0962557	0.115606	-0.83262	0.405059	0.607263	2R
ASTEI00433	309.235	-0.0562453	0.166344	-0.338127	0.735268	0.850657	2R
ASTEI00434	391.553	-0.482172	0.211947	-2.27497	0.0229079	0.0774393	2R
ASTEI00435	172.387	-0.104847	0.202533	-0.51768	0.604681	0.767719	2R
ASTEI00436	220.2	-0.197702	0.179363	-1.10224	0.270356	0.469107	2R
ASTEI00437	1069.33	0.0468705	0.153245	0.305853	0.759717	0.866225	2R
ASTEI00438	148.023	0.0372299	0.185949	0.200215	0.841312	0.912048	2R
ASTEI00439	217.175	0.0906714	0.16288	0.556675	0.577749	0.746731	2R
ASTEI00440	129.242	-0.120911	0.199699	-0.605467	0.544869	0.722967	2R
ASTEI00441	271.244	0.910203	0.189933	4.79222	1.64943e-06	2.12289e-05	2R
ASTEI00442	43.2379	0.288614	0.383374	0.752825	0.451555	0.64918	2R
ASTEI00443	27.8059	-0.329779	0.360132	-0.915717	0.359815	0.565154	2R
ASTEI00444	0.868301	0.473187	2.13261	0.221882	0.824406	0.90155	2R
ASTEI00445	2430.99	-0.225587	0.191953	-1.17522	0.239906	0.434162	2R
ASTEI00446	169.814	-0.431804	0.201754	-2.14026	0.0323341	0.101419	2R
ASTEI00447	2.69649	0.956803	1.13757	0.841094	0.400295	0.60275	2R
ASTEI00448	32.6782	0.85232	0.400108	2.13022	0.0331531	0.103355	2R
ASTEI00449	1144.93	0.193037	0.133251	1.44867	0.14743	0.313241	2R
ASTEI00450	5529.42	0.0447751	0.128254	0.349113	0.727004	0.846194	2R
ASTEI00451	364.838	-0.0614168	0.240744	-0.255113	0.798636	0.887181	2R
ASTEI00452	60.4525	-0.0681918	0.248829	-0.27405	0.784046	0.878923	2R
ASTEI00453	10007.5	-0.568281	0.151694	-3.74624	0.000179504	0.00134511	2R
ASTEI00454	317.817	0.0824165	0.194701	0.423299	0.672077	0.812364	2R
ASTEI00455	514.298	0.0696154	0.426026	0.163407	0.870198	0.92759	2R
ASTEI00456	104.113	-1.49547	0.286364	-5.22225	1.76762e-07	2.79882e-06	2R
ASTEI00457	301.12	0.227922	0.151121	1.50821	0.131502	0.288906	2R
ASTEI00458	880.578	0.0133365	0.152229	0.0876086	0.930188	0.963258	2R
ASTEI00459	532.829	-0.0287692	0.150326	-0.191378	0.848229	0.916117	2R
ASTEI00460	176.804	0.16115	0.174807	0.921875	0.356594	0.561867	2R
ASTEI00461	165.557	0.141225	0.193509	0.72981	0.465506	0.660617	2R
ASTEI00462	43.7648	0.315274	0.307118	1.02656	0.304628	0.506819	2R
ASTEI00463	361.384	0.0318469	0.182184	0.174806	0.861232	0.922766	2R
ASTEI00464	4521.01	-0.104508	0.0976608	-1.07011	0.284571	0.485009	2R
ASTEI00465	470.271	-0.297091	0.131655	-2.25659	0.0240339	0.0801726	2R
ASTEI00466	24.3674	-0.261109	0.384558	-0.678984	0.497148	0.685636	2R
ASTEI00467	148.92	-0.172952	0.182306	-0.948691	0.342778	0.54784	2R
ASTEI00468	1163.99	1.24921	0.169167	7.3845	1.53032e-13	6.07009e-12	2R
ASTEI00469	43.0512	0.140566	0.470993	0.298446	0.765362	0.869382	2R
ASTEI00470	1964.1	-0.113484	0.105117	-1.07961	0.280318	0.47966	2R
ASTEI00472	139.261	-0.157253	0.23426	-0.671277	0.502044	0.688386	2R
ASTEI00473	99.2271	0.0376119	0.218252	0.172333	0.863176	0.923741	2R
ASTEI00474	181.117	0.14548	0.157494	0.923719	0.355633	0.56119	2R
ASTEI00475	785.934	-0.109689	0.142889	-0.767649	0.442695	0.641968	2R
ASTEI00476	501.471	-1.33935	0.226781	-5.90591	3.50715e-09	7.57624e-08	2R
ASTEI00477	788.678	-0.124474	0.157537	-0.790123	0.429456	0.629638	2R
ASTEI00478	821.573	-0.0992496	0.16144	-0.614778	0.538702	0.718475	2R
ASTEI00479	230.371	-0.585839	0.180212	-3.25084	0.00115066	0.00661712	2R
ASTEI00480	23.8409	-0.354528	0.430999	-0.822574	0.41075	0.611756	2R
ASTEI00481	20.5231	-0.201304	0.428828	-0.469429	0.638763	0.791524	2R
ASTEI00482	19.2	0.305334	0.463138	0.659273	0.509721	0.694487	2R
ASTEI00483	227.308	-0.592172	0.233956	-2.53113	0.0113697	0.043711	2R
ASTEI00484	258.729	-0.431418	0.142958	-3.01779	0.00254622	0.0128105	2R
ASTEI00485	17.5468	-0.630054	0.601914	-1.04675	0.295214	0.496538	2R
ASTEI00486	2.79315	0.176257	1.11135	0.158596	0.873987	0.930086	2R
ASTEI00487	213.37	-0.129653	0.157192	-0.824806	0.409482	0.61105	2R
ASTEI00488	389.688	0.241974	0.136845	1.76823	0.0770221	0.196391	2R
ASTEI00489	9.68404	-1.62723	0.661527	-2.45981	0.013901	0.0515006	2R
ASTEI00490	1315.99	-0.260454	0.135799	-1.91794	0.0551188	0.153488	2R
ASTEI00491	68.2091	0.173961	0.279591	0.622199	0.533811	0.71432	2R
ASTEI00492	484.417	-0.585943	0.163972	-3.57343	0.000352332	0.00240588	2R
ASTEI00493	483.524	-0.180234	0.115451	-1.56113	0.118492	0.268502	2R
ASTEI00494	88.765	-0.114371	0.240448	-0.475657	0.634319	0.788792	2R
ASTEI00495	896.912	-0.156896	0.10983	-1.42854	0.153137	0.321429	2R
ASTEI00496	251.259	0.069956	0.175783	0.397967	0.690654	0.824952	2R
ASTEI00497	804.067	0.505519	0.127943	3.95111	7.779e-05	0.000647155	2R
ASTEI00498	2142.89	0.38755	0.186559	2.07736	0.0377686	0.115088	2R
ASTEI00499	311.457	-0.42735	0.154024	-2.77457	0.00552747	0.0241869	2R
ASTEI00500	625.515	-0.307186	0.219931	-1.39674	0.162492	0.334186	2R
ASTEI00501	1237.11	0.177516	0.123409	1.43843	0.150312	0.317394	2R
ASTEI00502	301.024	0.433515	0.180327	2.40404	0.0162148	0.0582172	2R
ASTEI00503	311.853	0.0866266	0.168865	0.512992	0.607957	0.769095	2R
ASTEI00504	475.565	0.253881	0.175135	1.44963	0.147161	0.312785	2R
ASTEI00505	211.82	0.182835	0.178934	1.0218	0.306874	0.509208	2R
ASTEI00506	263.796	-0.0915091	0.209134	-0.437562	0.661704	0.80586	2R
ASTEI00507	672.706	0.0285514	0.132003	0.216293	0.828759	0.904343	2R
ASTEI00508	472.292	0.10858	0.117601	0.923291	0.355855	0.561313	2R
ASTEI00509	409.175	-0.30943	0.169484	-1.82572	0.0678932	0.179434	2R
ASTEI00510	491.546	0.2016	0.186601	1.08038	0.279973	0.479423	2R
ASTEI00511	1543.88	0.365619	0.126832	2.8827	0.00394279	0.0183653	2R
ASTEI00512	145.735	0.744412	0.214609	3.46869	0.000522996	0.00338433	2R
ASTEI00513	392.732	-0.298978	0.183199	-1.63198	0.102683	0.241331	2R
ASTEI00514	281.005	-0.260667	0.203139	-1.2832	0.199422	0.383152	2R
ASTEI00515	358.106	-0.202984	0.160382	-1.26563	0.205647	0.391915	2R
ASTEI00516	340.54	0.662525	0.15232	4.34957	1.36405e-05	0.000138818	2R
ASTEI00517	360.847	0.0113408	0.129287	0.0877175	0.930101	0.963254	2R
ASTEI00518	841.023	-0.225532	0.14575	-1.54739	0.121769	0.273327	2R
ASTEI00519	1090.34	0.244181	0.108504	2.25044	0.0244213	0.0810696	2R
ASTEI00520	478.821	0.0653998	0.137722	0.474869	0.63488	0.789027	2R
ASTEI00521	435.822	-0.785975	0.186701	-4.20981	2.55584e-05	0.000243276	2R
ASTEI00522	1.1134	-3.38185	1.94907	-1.73511	0.0827211	0.206972	2R
ASTEI00523	1.52221	-0.278815	1.64294	-0.169705	0.865242	0.924334	2R
ASTEI00524	14.8158	-0.69564	0.723382	-0.96165	0.336226	0.540622	2R
ASTEI00525	2.88929	0.425227	1.16016	0.366524	0.713974	0.839859	2R
ASTEI00526	2.41241	-2.4522	1.42974	-1.71513	0.0863206	0.213724	2R
ASTEI00527	7.23989	-1.3846	0.781976	-1.77064	0.0766202	0.195698	2R
ASTEI00528	4.84449	-1.26066	0.909812	-1.38562	0.165862	0.338539	2R
ASTEI00529	2.05567	-2.16325	1.6021	-1.35026	0.176934	0.354173	2R
ASTEI00530	61.6822	-0.847037	0.257294	-3.29209	0.000994451	0.00586973	2R
ASTEI00531	1.1483	1.97816	2.15013	0.920021	0.357562	0.562971	2R
ASTEI00532	60.8209	-0.00731239	0.264198	-0.0276777	0.977919	0.98881	2R
ASTEI00533	168.605	-0.245225	0.210343	-1.16583	0.243682	0.438075	2R
ASTEI00534	561.97	-0.590821	0.202611	-2.91603	0.00354513	0.0168032	2R
ASTEI00535	721.83	-0.0977523	0.12506	-0.781644	0.434424	0.634676	2R
ASTEI00536	392.78	-0.402447	0.152784	-2.6341	0.00843605	0.034269	2R
ASTEI00537	11.0986	-1.38549	0.70063	-1.97749	0.0479858	0.138385	2R
ASTEI00538	13.5317	-0.20854	0.522908	-0.398808	0.690035	0.824806	2R
ASTEI00539	267.518	-0.299106	0.156581	-1.91024	0.0561023	0.155637	2R
ASTEI00540	1030.35	0.159058	0.135445	1.17434	0.240261	0.434453	2R
ASTEI00541	530.882	0.103849	0.142809	0.727188	0.467111	0.661963	2R
ASTEI00542	11.5312	-0.224321	0.589045	-0.380821	0.703336	0.833589	2R
ASTEI00543	199.826	-0.137803	0.163991	-0.840308	0.400736	0.603049	2R
ASTEI00544	1134.97	0.0958323	0.0984906	0.97301	0.330549	0.534549	2R
ASTEI00545	39.2876	-0.311424	0.367158	-0.848202	0.396326	0.59905	2R
ASTEI00546	996.098	-0.0888404	0.199188	-0.446012	0.655589	0.80267	2R
ASTEI00547	411.594	-0.0521915	0.177902	-0.293373	0.769237	0.872202	2R
ASTEI00548	379.401	-0.412961	0.166152	-2.48544	0.012939	0.0486186	2R
ASTEI00549	67.1577	-0.291508	0.509427	-0.572227	0.567168	0.738765	2R
ASTEI00550	351.34	0.160705	0.157605	1.01967	0.307887	0.509958	2R
ASTEI00551	1378.81	0.374122	0.145756	2.56677	0.0102651	0.0402909	2R
ASTEI00552	384.349	-0.188062	0.156236	-1.20371	0.228703	0.420701	2R
ASTEI00553	326.134	-0.100616	0.169942	-0.592058	0.553812	0.728546	2R
ASTEI00554	360.561	0.357424	0.239875	1.49004	0.136213	0.295735	2R
ASTEI00555	2649.05	-0.203633	0.103675	-1.96415	0.0495132	0.141909	2R
ASTEI00556	1290.05	0.218201	0.20004	1.09078	0.275368	0.474614	2R
ASTEI00557	184.318	-0.258001	0.309513	-0.833571	0.404523	0.606784	2R
ASTEI00558	651.089	-0.269813	0.161631	-1.66932	0.095055	0.228108	2R
ASTEI00559	653.361	-0.0147352	0.114057	-0.129192	0.897206	0.944168	2R
ASTEI00560	45.1848	1.3156	0.364006	3.61423	0.00030124	0.00210777	2R
ASTEI00561	344.348	-0.262061	0.134308	-1.9512	0.0510338	0.145051	2R
ASTEI00562	808.289	-0.205585	0.143385	-1.4338	0.15163	0.319563	2R
ASTEI00563	1103.53	0.00334078	0.125068	0.0267117	0.97869	0.989105	2R
ASTEI00564	74.9701	0.269832	0.248885	1.08416	0.278294	0.477666	2R
ASTEI00565	588.294	0.101212	0.149949	0.674977	0.49969	0.687166	2R
ASTEI00566	254.905	-0.557364	0.188696	-2.95377	0.0031392	0.0151952	2R
ASTEI00567	627.363	-0.157671	0.143323	-1.10011	0.271283	0.469954	2R
ASTEI00568	1574.18	-0.21498	0.0973861	-2.2075	0.0272792	0.0884841	2R
ASTEI00569	151.967	-0.58319	0.188637	-3.09161	0.00199077	0.0104739	2R
ASTEI00570	98.6243	0.493715	0.197366	2.50153	0.0123659	0.0468437	2R
ASTEI00571	342.01	0.28728	0.153167	1.8756	0.0607096	0.16551	2R
ASTEI00572	431.675	0.973792	0.165003	5.90165	3.59891e-09	7.76003e-08	2R
ASTEI00573	2611.49	0.134075	0.114617	1.16977	0.242095	0.436125	2R
ASTEI00574	924.206	-0.310692	0.112151	-2.7703	0.00560042	0.0244508	2R
ASTEI00575	529.627	-0.0214383	0.156174	-0.137272	0.890816	0.940365	2R
ASTEI00576	765.225	0.387306	0.125275	3.09166	0.00199041	0.0104739	2R
ASTEI00577	176.763	0.238525	0.157136	1.51795	0.129026	0.284975	2R
ASTEI00578	796.104	0.185266	0.112516	1.64657	0.0996465	0.236542	2R
ASTEI00579	88.9704	0.389434	0.230733	1.68781	0.0914469	0.22211	2R
ASTEI00580	0.747232	-0.190849	2.5223	-0.0756644	0.939686	0.967679	2R
ASTEI00581	0.844986	0.533782	2.14121	0.24929	0.803136	0.889042	2R
ASTEI00582	36.1583	-0.217244	0.358202	-0.606484	0.544194	0.722648	2R
ASTEI00583	4.42645	-0.220098	0.973853	-0.226007	0.821196	0.899353	2R
ASTEI00584	1360.31	-0.16729	0.103248	-1.62026	0.105175	0.245698	2R
ASTEI00585	986.97	0.0211471	0.112276	0.18835	0.850603	0.917383	2R
ASTEI00586	680.368	-0.181051	0.18373	-0.985421	0.324418	0.527593	2R
ASTEI00587	649.46	-0.706319	0.161261	-4.37998	1.1869e-05	0.000123162	2R
ASTEI00588	540.204	-0.811822	0.168204	-4.8264	1.39022e-06	1.82773e-05	2R
ASTEI00589	5.64018	0.367704	0.786277	0.467652	0.640034	0.792338	2R
ASTEI00591	1439	-0.231634	0.116207	-1.99328	0.046231	0.134695	2R
ASTEI00592	29.6627	-1.02805	0.424957	-2.41917	0.0155558	0.0564085	2R
ASTEI00593	294.867	-1.21315	0.195389	-6.20888	5.33636e-10	1.3252e-08	2R
ASTEI00594	422.241	-0.766989	0.201208	-3.81192	0.000137894	0.00106344	2R
ASTEI00595	2.12282	-0.528393	1.32645	-0.398351	0.690372	0.824952	2R
ASTEI00597	288.6	-1.53896	0.170708	-9.01514	1.9662e-19	1.40191e-17	2R
ASTEI00598	80.9577	-2.02857	0.277169	-7.31889	2.50022e-13	9.55842e-12	2R
ASTEI00599	127.804	-0.325599	0.214315	-1.51925	0.128699	0.284632	2R
ASTEI00600	1362.22	-0.0267707	0.120449	-0.222257	0.824114	0.901445	2R
ASTEI00601	219.656	-0.532636	0.237328	-2.2443	0.0248128	0.0820891	2R
ASTEI00602	278.192	-0.493938	0.16461	-3.00065	0.00269402	0.013432	2R
ASTEI00603	130.049	-0.65286	0.200821	-3.25095	0.00115019	0.00661712	2R
ASTEI00604	274.439	-0.489094	0.221185	-2.21124	0.0270192	0.0877634	2R
ASTEI00605	366.311	-0.524741	0.177289	-2.95981	0.00307834	0.014938	2R
ASTEI00606	107.103	-0.312047	0.239389	-1.30351	0.1924	0.374176	2R
ASTEI00607	71.6903	-0.389295	0.289979	-1.3425	0.179436	0.357028	2R
ASTEI00608	3.90894	0.711608	0.960201	0.741103	0.458631	0.655381	2R
ASTEI00609	1.49023	1.00751	1.54761	0.651007	0.515042	0.699114	2R
ASTEI00610	169.361	-0.31072	0.169972	-1.82806	0.0675403	0.178705	2R
ASTEI00611	934.238	0.31077	0.120054	2.58858	0.00963737	0.0381881	2R
ASTEI00612	62.3014	0.2175	0.439331	0.49507	0.620551	0.778722	2R
ASTEI00613	2532.33	-1.04318	0.108253	-9.6365	5.60676e-22	5.21294e-20	2R
ASTEI00614	312.587	0.11554	0.177883	0.64953	0.515996	0.699705	2R
ASTEI00615	309.488	-0.0386111	0.142413	-0.271121	0.786298	0.879978	2R
ASTEI00616	689.714	-0.123358	0.13019	-0.947516	0.343376	0.548239	2R
ASTEI00617	138.301	0.365939	0.178286	2.05254	0.0401169	0.120295	2R
ASTEI00618	129.826	-0.630665	0.198727	-3.17353	0.00150597	0.00829104	2R
ASTEI00619	653.873	0.32714	0.131488	2.48798	0.0128472	0.0483303	2R
ASTEI00620	20.0677	0.0101852	0.530814	0.0191878	0.984691	0.992303	2R
ASTEI00621	531.558	-0.21316	0.165906	-1.28482	0.198854	0.38263	2R
ASTEI00622	23.4932	0.128342	0.385238	0.333149	0.739022	0.852934	2R
ASTEI00623	561.42	0.212763	0.13173	1.61515	0.106279	0.247927	2R
ASTEI00624	52.5167	0.80113	0.319993	2.50358	0.0122942	0.0466204	2R
ASTEI00625	184.555	-0.2138	0.178435	-1.1982	0.230839	0.422966	2R
ASTEI00626	825.596	1.86695	0.187035	9.98187	1.82994e-23	1.88208e-21	2R
ASTEI00628	422.041	0.277433	0.145105	1.91194	0.055884	0.155156	2R
ASTEI00629	5.53613	0.254198	0.832215	0.305447	0.760025	0.866492	2R
ASTEI00630	293.279	-0.747888	0.182882	-4.08947	4.32367e-05	0.000383879	2R
ASTEI00631	214.799	0.0523324	0.177787	0.294354	0.768487	0.871692	2R
ASTEI00632	556.144	0.339082	0.192411	1.76228	0.0780224	0.198419	2R
ASTEI00633	184.743	0.157499	0.26218	0.600729	0.548021	0.725244	2R
ASTEI00634	93.202	-0.120728	0.255847	-0.471874	0.637017	0.790255	2R
ASTEI00635	6.05686	-0.13739	0.730326	-0.188121	0.850782	0.917405	2R
ASTEI00636	196.692	0.302811	0.211809	1.42964	0.152821	0.321085	2R
ASTEI00637	530.75	-0.163683	0.126974	-1.28911	0.19736	0.380827	2R
ASTEI00638	357.621	0.207686	0.173717	1.19554	0.231877	0.424257	2R
ASTEI00639	946.528	0.374806	0.113097	3.31403	0.000919629	0.00548099	2R
ASTEI00640	192.67	-0.255846	0.161898	-1.58029	0.11404	0.260797	2R
ASTEI00641	922.14	-0.245849	0.163027	-1.50802	0.131549	0.288955	2R
ASTEI00642	90.4127	-0.0691844	0.240955	-0.287125	0.774016	0.874203	2R
ASTEI00643	311.12	-0.442716	0.178713	-2.47725	0.01324	0.0495886	2R
ASTEI00644	273.92	-0.0959149	0.180469	-0.531476	0.595089	0.760832	2R
ASTEI00645	621.518	-0.171634	0.107815	-1.59193	0.111402	0.256276	2R
ASTEI00646	752.697	-0.284049	0.102011	-2.7845	0.00536095	0.0236183	2R
ASTEI00647	567.599	0.0449365	0.127333	0.352905	0.724159	0.844772	2R
ASTEI00648	276.209	-0.599518	0.188122	-3.18686	0.00143828	0.00799085	2R
ASTEI00649	236.724	0.127499	0.217451	0.586331	0.557653	0.731329	2R
ASTEI00650	101.101	0.412757	0.206804	1.99589	0.0459462	0.134132	2R
ASTEI00651	152.222	-0.503755	0.193677	-2.60101	0.00929499	0.0370842	2R
ASTEI00652	60.7568	-0.6382	0.434898	-1.46747	0.142248	0.304682	2R
ASTEI00653	2036.79	0.290838	0.125744	2.31295	0.0207256	0.0712854	2R
ASTEI00654	282.761	-0.366657	0.186344	-1.96764	0.0491096	0.140857	2R
ASTEI00655	2.71088	-0.644623	1.0899	-0.591453	0.554217	0.728798	2R
ASTEI00656	3.96375	0.461353	0.972357	0.474469	0.635166	0.78917	2R
ASTEI00657	1.69408	1.47931	1.40928	1.04969	0.293859	0.495365	2R
ASTEI00658	109.858	-0.524765	0.216789	-2.42063	0.0154937	0.0562361	2R
ASTEI00659	1136.6	-0.198783	0.13047	-1.52359	0.127611	0.282979	2R
ASTEI00660	180.921	-0.640835	0.250025	-2.56308	0.0103747	0.0405566	2R
ASTEI00661	94.0685	0.0609243	0.296195	0.205689	0.837034	0.909149	2R
ASTEI00662	1252.2	-0.00346374	0.146397	-0.0236599	0.981124	0.990757	2R
ASTEI00663	103.004	0.0010143	0.226313	0.00448185	0.996424	0.997731	2R
ASTEI00664	1178.54	-0.308207	0.106403	-2.89661	0.00377216	0.0176848	2R
ASTEI00665	281.086	-0.412425	0.147972	-2.78718	0.00531683	0.0234595	2R
ASTEI00666	1192.18	0.405127	0.145047	2.79308	0.00522091	0.0231064	2R
ASTEI00667	152.349	-0.0729116	0.188196	-0.387424	0.698442	0.830584	2R
ASTEI00668	614.856	-0.474706	0.180355	-2.63207	0.00848666	0.0344385	2R
ASTEI00669	942.006	0.299665	0.150991	1.98466	0.0471824	0.136508	2R
ASTEI00670	629.483	0.0240169	0.138591	0.173294	0.862421	0.923273	2R
ASTEI00671	796.812	-0.128932	0.190429	-0.677061	0.498367	0.686474	2R
ASTEI00672	2446.98	0.132801	0.108211	1.22723	0.219735	0.410026	2R
ASTEI00673	40.871	0.824726	0.311549	2.64718	0.00811657	0.0332334	2R
ASTEI00674	44.0375	-1.0404	0.313717	-3.31636	0.000911989	0.00544383	2R
ASTEI00675	1660.44	-1.06387	0.147822	-7.19697	6.15641e-13	2.26424e-11	2R
ASTEI00676	1653.63	-0.369767	0.118829	-3.11177	0.0018597	0.00989171	2R
ASTEI00677	248.918	0.207374	0.142749	1.45272	0.146302	0.311455	2R
ASTEI00678	333.228	-0.0226677	0.133401	-0.169921	0.865072	0.924324	2R
ASTEI00679	804.407	-0.46678	0.157679	-2.96031	0.00307328	0.0149197	2R
ASTEI00680	675.668	1.23994	0.428047	2.89675	0.00377055	0.0176848	2R
ASTEI00681	626.842	0.159816	0.117646	1.35845	0.174322	0.350574	2R
ASTEI00682	80.0821	-0.535546	0.359232	-1.49081	0.136012	0.295574	2R
ASTEI00683	419.96	-0.273276	0.152058	-1.79719	0.0723053	0.188078	2R
ASTEI00684	439.74	-0.0800282	0.160662	-0.498115	0.618403	0.77757	2R
ASTEI00685	133.642	0.243113	0.206647	1.17646	0.23941	0.433602	2R
ASTEI00686	43.1259	0.611671	0.342688	1.78492	0.0742739	0.191782	2R
ASTEI00687	449.256	0.517857	0.143198	3.61636	0.000298773	0.00209177	2R
ASTEI00688	646.533	0.211363	0.188551	1.12099	0.262294	0.460571	2R
ASTEI00689	377.906	0.0691174	0.21665	0.319028	0.749706	0.860189	2R
ASTEI00690	773.517	0.112036	0.206959	0.541344	0.58827	0.755282	2R
ASTEI00691	78.0129	-0.790587	0.278905	-2.83461	0.00458811	0.0208293	2R
ASTEI00692	212.774	-0.182796	0.16159	-1.13123	0.257957	0.455689	2R
ASTEI00693	216.207	0.201068	0.23853	0.842948	0.399257	0.601838	2R
ASTEI00694	211.129	0.541926	0.17048	3.17883	0.00147869	0.00816218	2R
ASTEI00695	592.785	0.460665	0.181305	2.54082	0.0110591	0.042786	2R
ASTEI00696	911.149	-0.133473	0.139273	-0.958356	0.337883	0.542537	2R
ASTEI00697	884.793	0.0546991	0.147897	0.369846	0.711497	0.838048	2R
ASTEI00698	12.5644	-1.52431	0.567772	-2.68472	0.00725909	0.0303581	2R
ASTEI00699	322.227	-0.505215	0.154647	-3.26689	0.00108736	0.00632973	2R
ASTEI00700	459.584	0.268404	0.154396	1.73841	0.0821388	0.206092	2R
ASTEI00701	329.872	0.278215	0.173194	1.60638	0.10819	0.251427	2R
ASTEI00702	1053.68	0.0350668	0.124227	0.28228	0.777729	0.876019	2R
ASTEI00703	750.43	-0.00317025	0.11594	-0.0273439	0.978185	0.988907	2R
ASTEI00704	102.05	-0.108745	0.255684	-0.42531	0.67061	0.811604	2R
ASTEI00705	512.21	0.159005	0.137022	1.16043	0.245875	0.441117	2R
ASTEI00706	1825.25	0.0600285	0.133514	0.449604	0.652996	0.801047	2R
ASTEI00707	1839.56	0.0701962	0.12168	0.576891	0.564013	0.736204	2R
ASTEI00708	1280.58	0.165924	0.10203	1.62623	0.1039	0.243386	2R
ASTEI00709	558.8	-0.780321	0.173838	-4.48877	7.16355e-06	7.83206e-05	2R
ASTEI00710	324.171	0.578145	0.165997	3.48287	0.000496078	0.00324082	2R
ASTEI00711	86.1126	-0.40008	0.257823	-1.55176	0.120719	0.271636	2R
ASTEI00712	24.1449	-1.49287	0.414063	-3.60541	0.000311661	0.00216764	2R
ASTEI00713	1046.16	0.508466	0.133707	3.80284	0.000143045	0.00110097	2R
ASTEI00714	608.35	0.473429	0.142445	3.3236	0.000888646	0.00532089	2R
ASTEI00715	385.139	0.767909	0.517729	1.48323	0.138014	0.298541	2R
ASTEI00716	5565.46	0.203822	0.111015	1.836	0.0663583	0.176733	2R
ASTEI00717	157.305	-0.135265	0.188419	-0.717894	0.472823	0.66632	2R
ASTEI00718	13.2184	0.485147	0.509294	0.952589	0.340799	0.545559	2R
ASTEI00719	3.28591	3.90084	1.41664	2.75358	0.00589474	0.025449	2R
ASTEI00720	33.2372	-4.56371	0.650602	-7.01461	2.30599e-12	8.07234e-11	2R
ASTEI00721	177.924	0.225763	0.188353	1.19861	0.230678	0.422862	2R
ASTEI00722	0.907794	-1.89776	2.17588	-0.87218	0.38311	0.587634	2R
ASTEI00723	350.891	-0.39537	0.29659	-1.33305	0.182515	0.36173	2R
ASTEI00724	0.547594	-2.36155	2.68837	-0.878434	0.379708	NA	2R
ASTEI00725	4.93659	-0.448628	1.07172	-0.418606	0.675504	0.814668	2R
ASTEI00726	28.0593	-1.10275	0.538713	-2.04702	0.0406565	0.121561	2R
ASTEI00727	110.971	-0.257501	0.201636	-1.27706	0.201582	0.386153	2R
ASTEI00728	77.3156	-0.290833	0.222538	-1.30689	0.19125	0.372376	2R
ASTEI00729	2.21852	1.29804	1.28858	1.00734	0.31377	0.516082	2R
ASTEI00730	39.2697	-0.33097	0.348719	-0.949102	0.342569	0.547714	2R
ASTEI00731	544.938	-0.440568	0.177184	-2.4865	0.0129005	0.0484894	2R
ASTEI00732	258.106	-0.23849	0.178221	-1.33817	0.18084	0.358963	2R
ASTEI00733	24.5842	-0.457324	0.377114	-1.21269	0.225247	0.417184	2R
ASTEI00734	1246.43	0.499048	0.108678	4.59197	4.39075e-06	5.08766e-05	2R
ASTEI00735	1670.56	0.0361885	0.127777	0.283215	0.777012	0.875796	2R
ASTEI00736	265.975	0.562018	0.14855	3.78335	0.00015473	0.00117973	2R
ASTEI00737	1116.8	0.61005	0.167452	3.64314	0.000269336	0.00192511	2R
ASTEI00738	326.848	0.729324	0.147367	4.94902	7.45865e-07	1.03814e-05	2R
ASTEI00740	157.116	0.265289	0.181763	1.45953	0.144418	0.308308	2R
ASTEI00741	10.3084	0.259237	0.623822	0.415562	0.677731	0.816017	2R
ASTEI00742	26.7919	0.236671	0.495943	0.477215	0.633209	0.787994	2R
ASTEI00743	212.383	-2.04407	0.182454	-11.2032	3.93247e-29	6.09375e-27	2R
ASTEI00744	577.138	-0.634798	0.165015	-3.84692	0.000119614	0.000940561	2R
ASTEI00745	211.685	-0.103336	0.239194	-0.43202	0.665727	0.808303	2R
ASTEI00746	415.639	-0.0773302	0.189243	-0.408629	0.682812	0.819192	2R
ASTEI00747	32.9022	-0.232609	0.350825	-0.663034	0.507309	0.692631	2R
ASTEI00748	300.034	-0.492967	0.164322	-3.00001	0.00269973	0.0134489	2R
ASTEI00749	109.339	-0.355077	0.259703	-1.36724	0.17155	0.346409	2R
ASTEI00750	407.444	-0.0299562	0.234201	-0.127908	0.898222	0.944569	2R
ASTEI00751	0.830678	-0.518112	2.01315	-0.257364	0.796898	0.886404	2R
ASTEI00752	149.208	-0.341603	0.221145	-1.5447	0.122419	0.274346	2R
ASTEI00753	1462.34	-0.64648	0.120447	-5.36734	7.9905e-08	1.36366e-06	2R
ASTEI00754	234.765	-0.202846	0.149874	-1.35344	0.175914	0.352921	2R
ASTEI00755	224.481	0.127612	0.193784	0.658527	0.5102	0.694895	2R
ASTEI00756	395.757	0.746294	0.156665	4.76363	1.90142e-06	2.41171e-05	2R
ASTEI00757	77.4569	0.0767889	0.304668	0.252042	0.801009	0.887702	2R
ASTEI00758	416.913	0.3003	0.150554	1.99463	0.0460834	0.134332	2R
ASTEI00759	321.505	-0.363628	0.194762	-1.86704	0.061896	0.16831	2R
ASTEI00760	140.565	-0.496292	0.173523	-2.8601	0.0042351	0.0194778	2R
ASTEI00761	244.771	-0.104534	0.159395	-0.655821	0.511939	0.696367	2R
ASTEI00762	150.807	0.0881991	0.182266	0.483905	0.628454	0.784605	2R
ASTEI00763	86.8122	-0.279498	0.232608	-1.20159	0.229524	0.421649	2R
ASTEI00764	268.473	-0.282349	0.134099	-2.10552	0.035246	0.108973	2R
ASTEI00765	212.257	0.213927	0.159276	1.34313	0.179231	0.356909	2R
ASTEI00766	540.254	-0.242929	0.171904	-1.41317	0.157607	0.327675	2R
ASTEI00767	195.846	-0.0474211	0.19373	-0.24478	0.806627	0.891207	2R
ASTEI00768	266.247	-0.159567	0.277137	-0.575769	0.564772	0.736758	2R
ASTEI00769	853.913	0.586527	0.145168	4.04034	5.33735e-05	0.00046051	2R
ASTEI00770	680.23	-0.341085	0.126898	-2.68788	0.00719078	0.0301266	2R
ASTEI00771	806.085	-0.0909171	0.129493	-0.702102	0.482616	0.674316	2R
ASTEI00772	609.802	0.0599798	0.207726	0.288745	0.772777	0.874084	2R
ASTEI00773	390.366	0.138505	0.134121	1.03269	0.30175	0.50362	2R
ASTEI00774	834.101	0.240977	0.13113	1.8377	0.0661071	0.176336	2R
ASTEI00775	352.988	0.407778	0.142837	2.85485	0.00430574	0.0197246	2R
ASTEI00776	63.7529	-0.190529	0.289779	-0.657499	0.51086	0.695388	2R
ASTEI00777	472.519	0.0469903	0.161861	0.290312	0.771578	0.873324	2R
ASTEI00778	360.275	-0.0792925	0.156588	-0.506376	0.612593	0.772857	2R
ASTEI00779	260.874	0.0947976	0.146748	0.645987	0.518288	0.701721	2R
ASTEI00780	448.08	-0.102591	0.171628	-0.597752	0.550005	0.726382	2R
ASTEI00781	444.651	0.997738	0.158011	6.31435	2.71291e-10	6.97555e-09	2R
ASTEI00782	474.133	0.263458	0.125021	2.10731	0.0350911	0.108634	2R
ASTEI00783	332.078	0.045966	0.148249	0.310059	0.756516	0.864526	2R
ASTEI00784	214.45	-0.354012	0.215001	-1.64656	0.0996479	0.236542	2R
ASTEI00785	307.64	-0.181782	0.141734	-1.28256	0.199646	0.383518	2R
ASTEI00786	197.064	0.163735	0.181855	0.900362	0.367928	0.572354	2R
ASTEI00787	34.6338	-0.657355	0.331776	-1.98132	0.0475551	0.137381	2R
ASTEI00788	116.857	-0.688971	0.230412	-2.99016	0.00278828	0.0138131	2R
ASTEI00789	22.2852	-0.423064	0.396887	-1.06596	0.286443	0.486774	2R
ASTEI00790	536.145	-0.553925	0.118468	-4.67575	2.92884e-06	3.52736e-05	2R
ASTEI00791	197.849	-0.46828	0.175255	-2.67199	0.00754019	0.0313192	2R
ASTEI00792	714.804	0.508279	0.146195	3.47673	0.000507562	0.00330655	2R
ASTEI00793	185.796	-0.424467	0.177178	-2.39571	0.0165881	0.0593008	2R
ASTEI00794	415.734	-0.147066	0.154154	-0.95402	0.340073	0.544924	2R
ASTEI00795	1138.09	0.41094	0.119811	3.4299	0.000603804	0.00382629	2R
ASTEI00796	154.697	-0.341216	0.173634	-1.96514	0.0493975	0.141648	2R
ASTEI00797	1373.34	0.184701	0.179213	1.03062	0.302718	0.504616	2R
ASTEI00798	19.0889	0.865076	0.448923	1.927	0.0539791	0.151167	2R
ASTEI00799	217.92	0.193071	0.162495	1.18817	0.234768	0.427851	2R
ASTEI00800	134.741	-0.0953132	0.186729	-0.510436	0.609746	0.770519	2R
ASTEI00801	21.6099	-0.498241	0.422375	-1.17962	0.238152	0.43201	2R
ASTEI00802	47.568	-0.708506	0.294735	-2.40388	0.0162222	0.0582256	2R
ASTEI00803	2.81481	-1.53102	1.3035	-1.17454	0.240178	0.434453	2R
ASTEI00804	329.399	0.145852	0.143572	1.01588	0.309687	0.511683	2R
ASTEI00805	588.418	-0.230685	0.195567	-1.17957	0.238169	0.43201	2R
ASTEI00806	408.451	-0.446418	0.128431	-3.47593	0.000509087	0.00331091	2R
ASTEI00807	48.271	-0.142697	0.369013	-0.3867	0.698978	0.830881	2R
ASTEI00808	132.816	-0.334529	0.197208	-1.69632	0.0898246	0.219624	2R
ASTEI00809	320.504	-0.886687	0.139757	-6.34447	2.23187e-10	5.76418e-09	2R
ASTEI00810	1409.01	-0.746474	0.194469	-3.83852	0.000123776	0.000968053	2R
ASTEI00811	1583.72	-0.0854014	0.118642	-0.719826	0.471632	0.66545	2R
ASTEI00812	54.2407	-0.0812956	0.292348	-0.278078	0.780952	0.876967	2R
ASTEI00813	616.973	-0.11462	0.14647	-0.782548	0.433893	0.634142	2R
ASTEI00814	699.947	0.0868118	0.169012	0.513644	0.607501	0.768853	2R
ASTEI00815	239.43	0.430802	0.160666	2.68135	0.00733257	0.0305664	2R
ASTEI00816	353.295	-0.118988	0.175199	-0.679159	0.497037	0.68562	2R
ASTEI00817	7.81736	-0.550057	0.916752	-0.600006	0.548502	0.725799	2R
ASTEI00818	270.408	-0.441882	0.186149	-2.3738	0.0176059	0.0622688	2R
ASTEI00819	9.61957	0.289579	0.694977	0.416674	0.676917	0.815584	2R
ASTEI00820	53.0491	-0.00330527	0.285324	-0.0115842	0.990757	0.995154	2R
ASTEI00821	400.41	0.0443282	0.130035	0.340895	0.733183	0.849523	2R
ASTEI00822	210.133	-0.105905	0.173692	-0.609727	0.542043	0.721028	2R
ASTEI00823	368.236	-1.12152	0.194098	-5.77814	7.55319e-09	1.54548e-07	2R
ASTEI00824	762.171	-0.011483	0.134889	-0.0851297	0.932158	0.964091	2R
ASTEI00825	305.116	0.405339	0.182012	2.22699	0.0259478	0.084996	2R
ASTEI00826	10.0233	0.103481	0.811144	0.127574	0.898486	0.944654	2R
ASTEI00827	118.89	-0.0506652	0.260115	-0.19478	0.845565	0.914239	2R
ASTEI00828	510.482	-0.475867	0.126538	-3.76067	0.000169461	0.00127805	2R
ASTEI00829	119.246	-0.0389211	0.222814	-0.17468	0.861331	0.922786	2R
ASTEI00830	609.871	-0.165118	0.15029	-1.09866	0.271917	0.470551	2R
ASTEI00831	630.722	0.368682	0.165865	2.22279	0.0262302	0.0857275	2R
ASTEI00832	230.96	0.442021	0.180524	2.44855	0.0143434	0.052803	2R
ASTEI00833	286.312	0.400302	0.145371	2.75366	0.00589329	0.025449	2R
ASTEI00834	899.029	0.539022	0.196159	2.74788	0.00599822	0.025819	2R
ASTEI00835	731.342	-0.224632	0.147054	-1.52755	0.126624	0.281382	2R
ASTEI00836	642.302	0.0613064	0.145675	0.420842	0.67387	0.813816	2R
ASTEI00837	156.914	-0.118082	0.20807	-0.567511	0.570367	0.741643	2R
ASTEI00838	664.481	-0.0898263	0.147711	-0.608121	0.543108	0.721701	2R
ASTEI00839	406.97	0.0680881	0.142238	0.478693	0.632157	0.787206	2R
ASTEI00840	225.135	-0.0825234	0.17546	-0.470326	0.638122	0.790982	2R
ASTEI00841	369.226	-0.405643	0.171192	-2.36952	0.0178111	0.0628226	2R
ASTEI00842	557.436	0.358292	0.126818	2.82525	0.00472434	0.0213228	2R
ASTEI00843	555.719	-0.246082	0.180086	-1.36647	0.171791	0.346684	2R
ASTEI00844	369.491	-0.270629	0.179199	-1.51022	0.130988	0.28816	2R
ASTEI00845	1338.26	-0.000469524	0.114978	-0.00408359	0.996742	0.997772	2R
ASTEI00846	403.891	-0.0355715	0.140515	-0.253151	0.800152	0.887678	2R
ASTEI00847	119.136	0.883292	0.205298	4.3025	1.68885e-05	0.000169059	2R
ASTEI00848	1061.66	0.510845	0.113516	4.50019	6.7892e-06	7.47198e-05	2R
ASTEI00849	182.9	0.358682	0.279787	1.28198	0.19985	0.383847	2R
ASTEI00850	3532.13	-0.309824	0.123113	-2.51658	0.0118501	0.0452288	2R
ASTEI00851	468.302	-0.0939329	0.132359	-0.709685	0.4779	0.670068	2R
ASTEI00852	408.316	0.144905	0.149158	0.971489	0.331305	0.535301	2R
ASTEI00853	1643.26	0.468854	0.127682	3.67203	0.000240629	0.00174134	2R
ASTEI00854	576.748	0.30889	0.134399	2.29831	0.0215442	0.0736431	2R
ASTEI00855	395.92	-0.0785142	0.145339	-0.540215	0.589049	0.755296	2R
ASTEI00856	338.642	0.164281	0.137666	1.19333	0.23274	0.425099	2R
ASTEI00857	322.984	0.137021	0.162815	0.841574	0.400026	0.602606	2R
ASTEI00858	554.036	-0.155996	0.173027	-0.901569	0.367286	0.571892	2R
ASTEI00859	2515.97	0.124505	0.15382	0.809421	0.418273	0.618312	2R
ASTEI00860	408.12	-0.152984	0.144237	-1.06064	0.288855	0.489226	2R
ASTEI00861	891.807	-0.355959	0.120566	-2.95241	0.00315307	0.0152497	2R
ASTEI00862	357.796	0.415605	0.158519	2.6218	0.00874667	0.0352719	2R
ASTEI00863	292.895	-0.17319	0.160891	-1.07644	0.281731	0.481583	2R
ASTEI00864	803.97	-0.426507	0.155177	-2.74853	0.00598635	0.0257774	2R
ASTEI00865	379.067	-0.498327	0.158983	-3.13447	0.00172164	0.00927943	2R
ASTEI00866	25.5324	0.704688	0.389108	1.81104	0.070135	0.183832	2R
ASTEI00868	891.92	-0.479652	0.223034	-2.15058	0.0315097	0.0993236	2R
ASTEI00869	32.1623	-0.355439	0.506179	-0.702201	0.482554	0.674311	2R
ASTEI00870	90.6507	0.309674	0.274658	1.12749	0.259535	0.45778	2R
ASTEI00871	2.96124	1.48399	1.12473	1.31942	0.187029	0.367316	2R
ASTEI00872	17.6394	-0.569137	0.505648	-1.12556	0.260352	0.45873	2R
ASTEI00873	102.342	-0.604233	0.297723	-2.02952	0.0424058	0.125789	2R
ASTEI00874	1184.94	0.225681	0.107459	2.10016	0.0357152	0.110101	2R
ASTEI00875	71.1488	-0.055534	0.24942	-0.222652	0.823806	0.901193	2R
ASTEI00876	174.683	-0.0887628	0.206292	-0.430277	0.666994	0.809334	2R
ASTEI00877	106.42	-0.348585	0.197648	-1.76367	0.0777875	0.198019	2R
ASTEI00878	11.8343	-0.0645386	0.699804	-0.0922238	0.92652	0.961087	2R
ASTEI00879	104.818	0.384018	0.234081	1.64054	0.100893	0.238378	2R
ASTEI00880	334.822	-0.21522	0.170119	-1.26511	0.20583	0.391915	2R
ASTEI00881	1350.22	-0.0310862	0.120838	-0.257254	0.796982	0.886404	2R
ASTEI00882	950.947	0.826918	0.121768	6.79091	1.11426e-11	3.53822e-10	2R
ASTEI00883	684.57	-0.240753	0.132946	-1.81091	0.0701551	0.183843	2R
ASTEI00884	237.476	-0.0730777	0.202362	-0.361123	0.718008	0.842472	2R
ASTEI00885	452.796	-0.359202	0.224655	-1.5989	0.109842	0.25392	2R
ASTEI00886	818.741	-0.065884	0.195154	-0.3376	0.735665	0.850749	2R
ASTEI00887	0.559664	-2.3907	3.05251	-0.783191	0.433515	NA	2R
ASTEI00888	698.674	-0.204115	0.138902	-1.46949	0.141701	0.303734	2R
ASTEI00889	33.15	-0.858497	0.357869	-2.39891	0.0164438	0.0588574	2R
ASTEI00890	408.644	0.0159215	0.172489	0.0923043	0.926456	0.961087	2R
ASTEI00891	200.271	-0.0990955	0.191678	-0.516989	0.605164	0.767719	2R
ASTEI00892	0.851547	-0.556976	2.20621	-0.252458	0.800687	0.887678	2R
ASTEI00893	94.4933	0.129232	0.307292	0.420552	0.674082	0.813816	2R
ASTEI00894	0.29323	1.92563	3.77001	0.510776	0.609508	NA	2R
ASTEI00895	264.32	-0.312906	0.150916	-2.07338	0.0381367	0.11577	2R
ASTEI00896	228.741	-0.145458	0.194951	-0.746123	0.455593	0.652484	2R
ASTEI00897	428.182	-0.105031	0.151598	-0.692827	0.488418	0.678086	2R
ASTEI00898	3494.48	0.190017	0.101438	1.87323	0.0610368	0.166285	2R
ASTEI00899	5043.31	0.0197943	0.168506	0.117469	0.906488	0.949032	2R
ASTEI00900	1214.7	-0.594362	0.170735	-3.48119	0.000499193	0.00325385	2R
ASTEI00901	715.864	-0.705392	0.199067	-3.54348	0.000394877	0.00265736	2R
ASTEI00902	194.665	-0.681763	0.207315	-3.28853	0.00100711	0.00593241	2R
ASTEI00903	67.2333	-1.90777	0.310082	-6.15247	7.62831e-10	1.8242e-08	2R
ASTEI00904	6.55408	-1.58103	0.94198	-1.67841	0.0932669	0.225212	2R
ASTEI00905	738.043	-2.70741	0.162236	-16.6881	1.60044e-62	1.69094e-59	2R
ASTEI00906	595.624	0.265356	0.174244	1.5229	0.127785	0.283203	2R
ASTEI00907	2233.36	-0.226046	0.127118	-1.77824	0.075365	0.193524	2R
ASTEI00908	299.262	-0.969684	0.180769	-5.36422	8.13018e-08	1.37946e-06	2R
ASTEI00909	78.5193	0.384758	0.258743	1.48703	0.137007	0.297181	2R
ASTEI00910	107.108	-0.699668	0.239936	-2.91607	0.00354475	0.0168032	2R
ASTEI00911	957.869	0.412194	0.122814	3.35624	0.0007901	0.00481408	2R
ASTEI00912	123.848	-0.24533	0.197604	-1.24152	0.214413	0.403156	2R
ASTEI00913	3234.81	-0.0213737	0.12519	-0.17073	0.864436	0.924324	2R
ASTEI00914	324.819	0.218917	0.146653	1.49276	0.1355	0.294792	2R
ASTEI00915	272.634	0.206176	0.173125	1.19091	0.233689	0.426364	2R
ASTEI00916	331.251	-0.319779	0.164471	-1.94428	0.0518611	0.146828	2R
ASTEI00917	67.6105	-0.195867	0.285842	-0.685229	0.4932	0.682377	2R
ASTEI00918	142.229	0.0903141	0.252992	0.356984	0.721104	0.843687	2R
ASTEI00919	426.426	-0.410405	0.180073	-2.2791	0.022661	0.0768054	2R
ASTEI00920	423.407	0.0297738	0.203369	0.146403	0.883603	0.935949	2R
ASTEI00921	14.8661	0.808245	0.469982	1.71974	0.0854803	0.21214	2R
ASTEI00922	244.011	0.469711	0.160472	2.92705	0.0034219	0.0163004	2R
ASTEI00923	3356.44	-0.481836	0.134374	-3.58577	0.000336083	0.00230985	2R
ASTEI00924	901.618	-0.247826	0.155973	-1.58891	0.112081	0.257586	2R
ASTEI00925	118.187	0.604812	0.338562	1.78641	0.0740326	0.191414	2R
ASTEI00926	180.164	-0.308535	0.178115	-1.73222	0.0832343	0.207898	2R
ASTEI00927	1266.22	-0.0487502	0.130089	-0.374744	0.707851	0.836366	2R
ASTEI00928	1.83926	-0.170732	1.56631	-0.109003	0.9132	0.953297	2R
ASTEI00929	382.484	0.674627	0.165182	4.08414	4.42404e-05	0.000391391	2R
ASTEI00930	82.6099	-0.109254	0.281609	-0.387964	0.698042	0.830363	2R
ASTEI00931	16.2709	-0.650354	0.581409	-1.11858	0.263318	0.461373	2R
ASTEI00932	180.66	0.284138	0.175205	1.62174	0.104858	0.245154	2R
ASTEI00933	557.189	0.317507	0.271151	1.17096	0.241615	0.435474	2R
ASTEI00934	264.92	-0.343131	0.169161	-2.02843	0.0425163	0.125988	2R
ASTEI00935	124.248	0.133206	0.201434	0.661288	0.508427	0.693538	2R
ASTEI00936	875.362	0.0576048	0.146604	0.392928	0.694372	0.82752	2R
ASTEI00937	190.408	0.0466551	0.189948	0.245621	0.805976	0.890679	2R
ASTEI00938	608.946	0.201554	0.140897	1.4305	0.152572	0.320883	2R
ASTEI00939	346.031	0.277271	0.169969	1.63131	0.102825	0.241616	2R
ASTEI00940	12.8629	-0.487543	0.554089	-0.879899	0.378914	0.583276	2R
ASTEI00941	42.8623	-0.190014	0.329546	-0.576593	0.564215	0.736362	2R
ASTEI00942	90.031	0.319455	0.323486	0.987539	0.323379	0.526364	2R
ASTEI00943	233.139	-0.230407	0.191358	-1.20407	0.228563	0.420577	2R
ASTEI00944	265.421	0.0699273	0.168927	0.413949	0.678911	0.816806	2R
ASTEI00945	328.805	0.784069	0.164286	4.77258	1.8188e-06	2.3127e-05	2R
ASTEI00946	713.392	-0.189512	0.11939	-1.58734	0.112436	0.258044	2R
ASTEI00947	1583.61	0.0956073	0.165681	0.577057	0.563901	0.7362	2R
ASTEI00948	626.223	-0.488722	0.132641	-3.68456	0.000229094	0.00166616	2R
ASTEI00949	1489.67	-0.113734	0.119362	-0.95285	0.340666	0.545423	2R
ASTEI00951	2.68355	-0.687804	1.26717	-0.542789	0.587275	0.754511	2R
ASTEI00952	241.191	-0.064625	0.242193	-0.266832	0.789598	0.881966	2R
ASTEI00953	155.075	1.00491	0.244152	4.11593	3.8562e-05	0.000347416	2R
ASTEI00954	120.5	0.254045	0.242355	1.04824	0.294529	0.49594	2R
ASTEI00955	4.6887	0.0628801	0.879563	0.0714902	0.943008	0.969965	2R
ASTEI00956	328.411	0.492252	0.189183	2.60199	0.00926842	0.0370024	2R
ASTEI00957	78.6716	-0.685009	0.363389	-1.88506	0.0594222	0.162823	2R
ASTEI00958	130.693	-0.921576	0.341645	-2.69746	0.00698702	0.0294428	2R
ASTEI00959	530.795	0.432453	0.12332	3.50677	0.000453589	0.00300035	2R
ASTEI00960	997.513	0.670426	0.147624	4.54145	5.58689e-06	6.26141e-05	2R
ASTEI00961	342.321	0.17184	0.1869	0.91942	0.357876	0.562971	2R
ASTEI00962	194.415	0.0570177	0.209325	0.272388	0.785324	0.87946	2R
ASTEI00963	12.1127	0.57424	0.563336	1.01936	0.308034	0.509967	2R
ASTEI00964	45.2615	0.252341	0.330231	0.764135	0.444787	0.643669	2R
ASTEI00965	157.591	-0.159275	0.178029	-0.894656	0.370971	0.575547	2R
ASTEI00966	6.00691	0.859994	0.775417	1.10907	0.267398	0.465504	2R
ASTEI00967	582.435	0.119866	0.126189	0.949889	0.342168	0.5473	2R
ASTEI00968	46.3042	0.460183	0.393834	1.16847	0.242618	0.436689	2R
ASTEI00969	808.922	-0.194288	0.11511	-1.68785	0.0914408	0.22211	2R
ASTEI00970	864.94	0.0151685	0.142386	0.106531	0.915161	0.954387	2R
ASTEI00971	140.721	-0.281779	0.186074	-1.51434	0.12994	0.286653	2R
ASTEI00972	370.357	-0.300319	0.160871	-1.86683	0.0619251	0.168349	2R
ASTEI00973	1025.77	0.470186	0.235693	1.99491	0.0460528	0.134277	2R
ASTEI00974	267.927	0.177254	0.200239	0.88521	0.376043	0.580848	2R
ASTEI00975	72.0916	0.25914	0.258675	1.0018	0.316442	0.518641	2R
ASTEI00976	695.103	-0.262914	0.12687	-2.07231	0.0382361	0.115966	2R
ASTEI00977	190.026	-0.272094	0.16347	-1.66449	0.096014	0.229793	2R
ASTEI00978	301.663	0.418903	0.176753	2.37	0.0177882	0.0627609	2R
ASTEI00979	764.654	-1.03171	0.284151	-3.63084	0.000282495	0.00200192	2R
ASTEI00980	1296.56	0.509078	0.128268	3.96885	7.22199e-05	0.000605584	2R
ASTEI00981	655.962	0.158686	0.120648	1.31528	0.188417	0.368322	2R
ASTEI00982	405.821	0.0449933	0.119622	0.37613	0.70682	0.835645	2R
ASTEI00983	253.91	-0.0750668	0.15068	-0.498188	0.618351	0.77757	2R
ASTEI00984	958.443	0.431328	0.149015	2.89454	0.00379718	0.0177732	2R
ASTEI00985	235.895	-0.57804	0.171369	-3.37308	0.00074332	0.004566	2R
ASTEI00986	991.445	0.151365	0.162947	0.928922	0.35293	0.558061	2R
ASTEI00987	320.592	0.344371	0.147622	2.3328	0.0196587	0.0681401	2R
ASTEI00988	0.30954	0.295097	3.75146	0.078662	0.937301	NA	2R
ASTEI00989	863.181	0.285245	0.101606	2.80736	0.00499492	0.0223445	X
ASTEI00990	32.5748	0.56913	0.384119	1.48165	0.138434	0.29927	X
ASTEI00991	53.1771	-0.76521	0.33583	-2.27857	0.0226929	0.0768688	X
ASTEI00992	761.191	0.350302	0.146331	2.39391	0.0166698	0.0595562	X
ASTEI00993	286.424	0.231466	0.146714	1.57766	0.114643	0.261765	X
ASTEI00994	1049.32	0.794281	0.150364	5.2824	1.27503e-07	2.07831e-06	X
ASTEI00995	906.145	-0.0309452	0.117634	-0.263063	0.792502	0.883854	X
ASTEI00996	1104.4	0.960737	0.115384	8.32639	8.33427e-17	4.72492e-15	X
ASTEI00997	490.378	0.594723	0.1393	4.26937	1.96023e-05	0.000191928	X
ASTEI00998	298.091	0.297363	0.147256	2.01936	0.0434496	0.12823	X
ASTEI00999	523.248	-0.467917	0.143026	-3.27156	0.00106958	0.0062434	X
ASTEI01000	236.149	0.231184	0.15564	1.48537	0.137445	0.297802	X
ASTEI01001	713.876	0.211127	0.126397	1.67035	0.0948502	0.227852	X
ASTEI01002	575.457	0.411727	0.131447	3.13228	0.00173457	0.00933899	X
ASTEI01003	96.5625	0.385413	0.258364	1.49175	0.135766	0.295149	X
ASTEI01004	677.412	0.579214	0.113865	5.08686	3.64033e-07	5.37584e-06	X
ASTEI01005	174.775	0.213571	0.250558	0.852384	0.394001	0.596778	X
ASTEI01006	1354.14	-0.662576	0.416057	-1.59251	0.111269	0.256119	X
ASTEI01007	1711.35	0.526596	0.0925005	5.69289	1.24905e-08	2.43564e-07	X
ASTEI01008	272.645	0.73604	0.154663	4.75899	1.94561e-06	2.45134e-05	X
ASTEI01009	698.513	0.477033	0.210019	2.27139	0.0231236	0.0779641	X
ASTEI01010	1209.21	0.10817	0.120264	0.899443	0.368417	0.572961	X
ASTEI01011	367.918	0.984987	0.189964	5.18513	2.15864e-07	3.37655e-06	X
ASTEI01012	1054.28	0.731659	0.145792	5.01852	5.20719e-07	7.48059e-06	X
ASTEI01013	74.4211	0.0897964	0.409937	0.219049	0.826612	0.903157	X
ASTEI01014	535.413	1.14748	0.127877	8.97327	2.87847e-19	2.02749e-17	X
ASTEI01015	942.521	0.263798	0.122369	2.15576	0.0311022	0.098202	X
ASTEI01016	321.435	0.513947	0.13676	3.75802	0.000171262	0.00128996	X
ASTEI01017	197.317	-0.0375562	0.186403	-0.201479	0.840324	0.911541	X
ASTEI01018	232.955	0.715481	0.192777	3.71144	0.000206086	0.00151495	X
ASTEI01019	89.1005	1.0529	0.24841	4.23856	2.24956e-05	0.000217688	X
ASTEI01020	968.911	0.803853	0.169239	4.7498	2.03613e-06	2.55274e-05	X
ASTEI01021	532.757	0.956765	0.194092	4.92944	8.24656e-07	1.14097e-05	X
ASTEI01022	1311.72	0.814751	0.108847	7.48528	7.13938e-14	3.0063e-12	X
ASTEI01023	471.904	1.04863	0.130442	8.03906	9.05306e-16	4.62889e-14	X
ASTEI01024	439.407	1.08074	0.169539	6.37455	1.83498e-10	4.81402e-09	X
ASTEI01025	44.5819	1.12343	0.29099	3.86072	0.000113053	0.000896861	X
ASTEI01026	620.764	0.838653	0.229816	3.64923	0.000263029	0.00188466	X
ASTEI01027	201.373	0.671269	0.213213	3.14835	0.00164198	0.00891278	X
ASTEI01028	69.6316	0.924465	0.237363	3.89473	9.83101e-05	0.000792894	X
ASTEI01029	141.596	0.500464	0.185937	2.69158	0.00711153	0.0298592	X
ASTEI01030	426.111	0.0145739	0.124423	0.117132	0.906755	0.949226	X
ASTEI01031	292.883	0.276135	0.133163	2.07366	0.0381109	0.11577	X
ASTEI01032	798.314	-3.1618	0.246039	-12.8508	8.50981e-38	2.30002e-35	X
ASTEI01033	2300.16	-0.0804692	0.10951	-0.734814	0.462453	0.657849	X
ASTEI01034	272.996	0.690673	0.140953	4.90003	9.58224e-07	1.3071e-05	X
ASTEI01035	1319.51	0.549937	0.125794	4.37171	1.23279e-05	0.000127017	X
ASTEI01036	280.92	0.570953	0.137973	4.13816	3.50099e-05	0.000318626	X
ASTEI01037	436.078	0.0811017	0.155033	0.523126	0.600887	0.765049	X
ASTEI01038	65.9601	-0.198502	0.284456	-0.697832	0.485282	0.676253	X
ASTEI01039	45.8255	0.0879878	0.306541	0.287034	0.774086	0.874203	X
ASTEI01040	858.523	0.843764	0.12561	6.71731	1.85113e-11	5.75238e-10	X
ASTEI01041	333.208	0.602836	0.130346	4.62488	3.74814e-06	4.42451e-05	X
ASTEI01042	320.986	0.349911	0.141769	2.46818	0.0135803	0.050538	X
ASTEI01043	5.40451	-1.43538	1.31411	-1.09228	0.274709	0.474183	X
ASTEI01044	137.1	0.474438	0.238746	1.98721	0.046899	0.135959	X
ASTEI01045	1087.37	0.351185	0.152637	2.30078	0.0214039	0.0733077	X
ASTEI01046	450.433	0.894715	0.148931	6.0076	1.88289e-09	4.29921e-08	X
ASTEI01047	1236.54	0.817026	0.116786	6.99593	2.63511e-12	9.19678e-11	X
ASTEI01048	516.155	0.508369	0.142771	3.56072	0.000369835	0.00250772	X
ASTEI01049	739.912	0.36727	0.106644	3.44387	0.000573442	0.00365581	X
ASTEI01050	130.917	0.835385	0.222235	3.75901	0.000170587	0.00128571	X
ASTEI01051	1.40192	1.71327	1.55761	1.09994	0.271358	0.469954	X
ASTEI01052	3.20433	0.408384	1.32363	0.308534	0.757676	0.865001	X
ASTEI01053	0.73616	3.25329	2.7344	1.18977	0.234138	0.427082	X
ASTEI01054	50.7181	2.35046	0.375014	6.26767	3.665e-10	9.21961e-09	X
ASTEI01055	11.4115	-0.601989	0.553056	-1.08848	0.276384	0.475732	X
ASTEI01056	6.75342	-0.950306	0.726869	-1.3074	0.191078	0.372135	X
ASTEI01057	662.111	-0.753096	0.1974	-3.81507	0.000136142	0.00105273	X
ASTEI01058	147.357	0.784184	0.21627	3.62595	0.000287903	0.00203288	X
ASTEI01059	739.306	0.0291397	0.166489	0.175024	0.86106	0.922739	X
ASTEI01060	745.093	0.415814	0.11804	3.52265	0.000427255	0.00284722	X
ASTEI01061	236.185	0.339473	0.167344	2.02859	0.0424996	0.125971	X
ASTEI01062	699.322	0.504015	0.120906	4.16866	3.0639e-05	0.000285555	X
ASTEI01063	385.959	0.412826	0.179361	2.30165	0.0213546	0.0731889	X
ASTEI01064	298.924	0.834164	0.131354	6.35051	2.14604e-10	5.5797e-09	X
ASTEI01065	1723.91	0.441692	0.10319	4.28037	1.86581e-05	0.000184079	X
ASTEI01066	440.848	0.184343	0.129227	1.4265	0.153724	0.322136	X
ASTEI01067	690.561	0.260382	0.118985	2.18836	0.0286432	0.0920353	X
ASTEI01068	315.905	0.560994	0.159408	3.51922	0.000432815	0.00288097	X
ASTEI01069	90.8565	0.448442	0.298383	1.50291	0.132863	0.291131	X
ASTEI01070	1222.48	0.621111	0.121365	5.11771	3.09262e-07	4.63773e-06	X
ASTEI01071	19.7263	0.99799	0.443933	2.24807	0.0245719	0.08143	X
ASTEI01072	1636.03	-0.776806	0.157743	-4.9245	8.45774e-07	1.16602e-05	X
ASTEI01074	1750	1.09463	0.0983635	11.1284	9.12899e-29	1.343e-26	X
ASTEI01075	636.922	-1.48659	0.173891	-8.54901	1.24146e-17	7.59383e-16	X
ASTEI01076	856.02	-0.229598	0.139705	-1.64345	0.10029	0.237542	X
ASTEI01077	640.779	0.357711	0.124322	2.8773	0.00401089	0.0186235	X
ASTEI01078	123.86	0.52208	0.242118	2.1563	0.03106	0.0981194	X
ASTEI01079	82.6216	0.504317	0.297396	1.69578	0.0899284	0.219685	X
ASTEI01080	333.587	0.861599	0.201044	4.28562	1.82228e-05	0.000181013	X
ASTEI01081	0.614678	0.384284	2.69143	0.142781	0.886463	0.93759	X
ASTEI01082	241.137	1.53546	0.165897	9.25553	2.13175e-20	1.65168e-18	X
ASTEI01083	520.615	0.0275629	0.184925	0.14905	0.881515	0.93493	X
ASTEI01084	1154.45	0.909559	0.138443	6.5699	5.03475e-11	1.4592e-09	X
ASTEI01085	296.844	0.765737	0.148375	5.16082	2.45876e-07	3.78989e-06	X
ASTEI01086	63.7352	1.39956	0.275053	5.08831	3.61272e-07	5.35549e-06	X
ASTEI01087	14.4613	0.484138	0.518001	0.934628	0.34998	0.554604	X
ASTEI01088	70.6472	1.26949	0.285505	4.44648	8.72901e-06	9.35872e-05	X
ASTEI01089	8.7943	1.81106	0.683291	2.65049	0.00803741	0.0330424	X
ASTEI01090	280.426	0.816289	0.151892	5.37412	7.69567e-08	1.31722e-06	X
ASTEI01091	249.982	1.00726	0.223964	4.49743	6.87788e-06	7.55527e-05	X
ASTEI01092	104.773	1.46744	0.220278	6.66175	2.70585e-11	8.14699e-10	X
ASTEI01093	41.0144	0.731654	0.332919	2.19769	0.0279712	0.0903256	X
ASTEI01094	109.282	0.958699	0.243259	3.94106	8.11217e-05	0.000667703	X
ASTEI01095	157.347	1.20058	0.194848	6.1616	7.20116e-10	1.73996e-08	X
ASTEI01096	103.171	0.804134	0.224762	3.57771	0.000346623	0.00237527	X
ASTEI01097	124.64	0.561759	0.219861	2.55506	0.0106169	0.0413229	X
ASTEI01098	102.293	0.474929	0.224294	2.11744	0.0342227	0.106318	X
ASTEI01099	277.554	0.69094	0.226996	3.04384	0.00233577	0.0119429	X
ASTEI01100	791.658	0.319879	0.1401	2.28322	0.0224175	0.076049	X
ASTEI01101	534.443	0.473848	0.128063	3.70011	0.000215508	0.00157841	X
ASTEI01102	727.818	0.0961026	0.156307	0.614831	0.538666	0.718475	X
ASTEI01103	355.711	-1.91844	0.239993	-7.99375	1.30892e-15	6.50095e-14	X
ASTEI01104	580.923	0.113631	0.123827	0.917658	0.358798	0.563964	X
ASTEI01105	673.711	0.320389	0.16619	1.92785	0.0538737	0.150945	X
ASTEI01106	127.848	-0.173856	0.211357	-0.822571	0.410752	0.611756	X
ASTEI01107	980.76	0.81136	0.106018	7.65302	1.96312e-14	8.70815e-13	X
ASTEI01108	321.775	0.83164	0.201116	4.13513	3.54761e-05	0.000322112	X
ASTEI01109	93.6623	0.664222	0.212064	3.13217	0.00173517	0.00933899	X
ASTEI01110	591.275	0.243419	0.152737	1.59371	0.111	0.255606	X
ASTEI01111	315.771	0.553133	0.222854	2.48204	0.0130634	0.0490066	X
ASTEI01112	585.695	0.27803	0.127082	2.1878	0.0286843	0.0920991	X
ASTEI01113	317.444	0.260609	0.165275	1.57682	0.114838	0.26198	X
ASTEI01114	199.459	0.175223	0.159284	1.10007	0.271303	0.469954	X
ASTEI01115	302.511	0.563057	0.157915	3.56557	0.000363069	0.00247193	X
ASTEI01116	1754.57	0.580909	0.157312	3.69273	0.000221862	0.00161762	X
ASTEI01117	261.903	0.978626	0.163004	6.00367	1.92902e-09	4.37874e-08	X
ASTEI01118	5.99452	1.64834	0.759353	2.17072	0.0299527	0.0953948	X
ASTEI01119	45.9271	0.903405	0.345845	2.61216	0.00899709	0.0361189	X
ASTEI01120	105.555	1.07363	0.225588	4.75925	1.94317e-06	2.45134e-05	X
ASTEI01121	192.041	1.09214	0.226947	4.81229	1.49214e-06	1.9485e-05	X
ASTEI01122	535.861	0.531285	0.165689	3.20651	0.00134355	0.00753244	X
ASTEI01123	1818.81	0.776595	0.133582	5.81361	6.11381e-09	1.27567e-07	X
ASTEI01124	77.3002	0.764149	0.26205	2.91605	0.00354499	0.0168032	X
ASTEI01125	2017.12	0.170858	0.104876	1.62915	0.103282	0.242298	X
ASTEI01126	46.0348	0.849853	0.315459	2.69402	0.00705963	0.0296949	X
ASTEI01127	588.788	0.709527	0.201119	3.52789	0.000418881	0.00279784	X
ASTEI01128	271.372	0.718672	0.152277	4.71951	2.36408e-06	2.91361e-05	X
ASTEI01129	242.002	0.588417	0.172107	3.41891	0.000628727	0.00395404	X
ASTEI01130	243.58	2.29892	1.25756	1.82808	0.0675375	0.178705	X
ASTEI01131	4.52949	0.66495	0.853297	0.779271	0.43582	0.636079	X
ASTEI01132	508.121	0.609226	0.152283	4.00063	6.31746e-05	0.000537887	X
ASTEI01133	17.5114	0.656168	0.561045	1.16955	0.242183	0.436155	X
ASTEI01134	151.727	2.09855	0.268362	7.81985	5.28844e-15	2.49846e-13	X
ASTEI01135	1402.02	0.19841	0.109355	1.81436	0.0696221	0.182652	X
ASTEI01136	1366.22	0.826784	0.11929	6.93086	4.18298e-12	1.42148e-10	X
ASTEI01137	412.083	0.151232	0.158811	0.952277	0.340957	0.545737	X
ASTEI01138	275.951	0.208395	0.160359	1.29955	0.193755	0.375867	X
ASTEI01139	1548.32	0.231682	0.125025	1.85309	0.06387	0.17223	X
ASTEI01140	1450.24	-0.00678797	0.145389	-0.0466885	0.962761	0.979998	X
ASTEI01141	663.553	0.325622	0.10556	3.08471	0.00203749	0.0106569	X
ASTEI01142	949.327	0.592455	0.0972111	6.09453	1.09762e-09	2.58231e-08	X
ASTEI01143	52.8779	0.41905	0.280079	1.49618	0.134606	0.29353	X
ASTEI01144	291.593	0.22455	0.173143	1.2969	0.194664	0.377253	X
ASTEI01145	98.6579	0.117928	0.300888	0.391931	0.695109	0.828061	X
ASTEI01146	914.6	0.531399	0.174929	3.03779	0.00238317	0.0121266	X
ASTEI01147	492.679	0.690211	0.12444	5.54654	2.91376e-08	5.30779e-07	X
ASTEI01148	221.366	0.764195	0.164265	4.65221	3.28396e-06	3.92253e-05	X
ASTEI01149	1513.46	0.361506	0.119019	3.03739	0.0023864	0.0121377	X
ASTEI01150	264.026	0.293304	0.166618	1.76034	0.078351	0.199037	X
ASTEI01151	163.822	0.661683	0.325313	2.03399	0.0419526	0.124731	X
ASTEI01152	15.6624	0.411243	0.495919	0.829255	0.40696	0.609182	X
ASTEI01153	57.32	0.432038	0.30207	1.43026	0.152643	0.320915	X
ASTEI01154	136.803	0.988677	0.181014	5.46188	4.71107e-08	8.33365e-07	X
ASTEI01155	636.123	0.153542	0.122976	1.24855	0.211828	0.40008	X
ASTEI01156	29.0663	0.589821	0.424973	1.3879	0.165167	0.337656	X
ASTEI01157	316.298	0.991418	0.203941	4.8613	1.16617e-06	1.55606e-05	X
ASTEI01158	1080.13	0.148875	0.17561	0.847759	0.396572	0.599345	X
ASTEI01159	305.618	0.139723	0.141204	0.989516	0.322411	0.525554	X
ASTEI01160	208.673	0.629874	0.219689	2.86712	0.00414223	0.019134	X
ASTEI01161	502.477	0.339064	0.115062	2.9468	0.00321079	0.0154667	X
ASTEI01162	618.62	0.660803	0.193645	3.41245	0.000643823	0.0040337	X
ASTEI01163	212.752	1.20998	0.241484	5.01061	5.42582e-07	7.76586e-06	X
ASTEI01164	184.688	1.36232	0.373388	3.64854	0.000263734	0.00188855	X
ASTEI01165	1146.62	-0.889333	0.153972	-5.77593	7.65279e-09	1.56036e-07	X
ASTEI01166	38.5369	0.8767	0.30663	2.85915	0.00424783	0.0195209	X
ASTEI01167	392.439	-0.51379	0.159433	-3.22261	0.00127027	0.00718398	X
ASTEI01168	863.024	0.0468246	0.12178	0.3845	0.700608	0.831761	X
ASTEI01169	548.082	1.11229	0.140192	7.93406	2.12104e-15	1.02711e-13	X
ASTEI011690	0.302052	0.295097	3.78435	0.0779784	0.937845	NA	X
ASTEI01170	45.4599	-0.153645	0.522752	-0.293915	0.768823	0.871988	X
ASTEI01171	110.672	0.652551	1.1143	0.585616	NA	NA	X
ASTEI01172	96.659	3.92823	0.276839	14.1896	1.06304e-45	4.57582e-43	X
ASTEI01173	9.15717	4.01949	0.856054	4.69537	2.66125e-06	3.23864e-05	X
ASTEI01174	31.7272	1.76529	0.360551	4.89609	9.77621e-07	1.32578e-05	X
ASTEI01176	35.7138	1.00796	0.404424	2.49235	0.0126902	0.0478229	X
ASTEI01177	3.63893	1.04535	1.00598	1.03913	0.298744	0.500289	X
ASTEI01178	114.834	-0.250285	0.26693	-0.937646	0.348426	0.55316	X
ASTEI01179	989.364	0.372589	0.131684	2.82942	0.00466329	0.02108	X
ASTEI01180	1611.72	0.266422	0.117396	2.26944	0.0232418	0.0782719	X
ASTEI01181	380.949	0.570394	0.146212	3.90113	9.57447e-05	0.000774352	X
ASTEI01182	481.848	1.17154	0.158012	7.41424	1.22325e-13	4.95354e-12	X
ASTEI01183	21.8945	1.05335	0.444338	2.3706	0.0177592	0.0626966	X
ASTEI01184	761.042	0.387328	0.201406	1.92313	0.0544643	0.152284	X
ASTEI01185	1466.92	0.529065	0.131131	4.03462	5.46916e-05	0.000471183	X
ASTEI01186	15.2911	1.26975	0.507678	2.5011	0.0123807	0.0468845	X
ASTEI01188	45.7007	0.253031	0.2881	0.878273	0.379795	0.584169	X
ASTEI01189	287.171	0.771319	0.149722	5.15168	2.58166e-07	3.9479e-06	X
ASTEI01190	230.868	0.468489	0.163547	2.86455	0.00417602	0.0192671	X
ASTEI01191	0.28249	-1.35702	3.81199	-0.355987	0.72185	NA	X
ASTEI01192	907.017	0.77805	0.141057	5.51586	3.47076e-08	6.24414e-07	X
ASTEI01193	800.778	0.494028	0.138657	3.56294	0.000366722	0.00248951	X
ASTEI01194	331.606	0.641471	0.211395	3.03447	0.00240957	0.01224	X
ASTEI01195	596.221	1.1043	0.152634	7.23493	4.65759e-13	1.74615e-11	X
ASTEI01196	259.005	0.410364	0.179664	2.28407	0.0223676	0.0759218	X
ASTEI01197	130.449	0.508675	0.216305	2.35166	0.01869	0.065446	X
ASTEI01198	2845.47	0.0262023	0.118116	0.221835	0.824443	0.90155	X
ASTEI01199	538.813	0.819794	0.191404	4.28306	1.84337e-05	0.000182795	X
ASTEI01200	201.839	0.779001	0.225409	3.45595	0.000548354	0.00351904	X
ASTEI01201	105.66	0.157322	0.233359	0.674162	0.500208	0.687166	X
ASTEI01202	106.795	0.819442	0.216225	3.78976	0.000150793	0.00115373	X
ASTEI01203	383.443	0.776816	0.207632	3.74131	0.000183065	0.00136646	X
ASTEI01204	344.038	1.66018	0.1922	8.63777	5.73184e-18	3.56232e-16	X
ASTEI01205	804.443	0.506588	0.176761	2.86595	0.00415759	0.0191972	X
ASTEI01206	742.243	1.15046	0.162098	7.09729	1.27227e-12	4.54964e-11	X
ASTEI01207	347.217	0.480636	0.148034	3.24679	0.00116714	0.00669523	X
ASTEI01208	258.306	1.27161	0.142811	8.90411	5.38159e-19	3.72291e-17	X
ASTEI01209	659.673	0.215556	0.163543	1.31804	0.187489	0.367578	X
ASTEI01210	565.277	0.189838	0.127138	1.49316	0.135395	0.294674	X
ASTEI01211	861.565	0.0629589	0.134926	0.466618	0.640773	0.793085	X
ASTEI01212	318.421	0.500194	0.147383	3.39383	0.000689222	0.00427435	X
ASTEI01213	649.205	0.707125	0.113931	6.20661	5.41413e-10	1.34164e-08	X
ASTEI01214	322.247	0.171581	0.196596	0.872762	0.382793	0.587255	X
ASTEI01215	57.4307	0.916241	0.301988	3.03403	0.00241314	0.0122523	X
ASTEI01216	439.566	0.548736	0.139372	3.93721	8.24335e-05	0.00067754	X
ASTEI01217	351.942	0.44677	0.143681	3.10945	0.00187435	0.00995228	X
ASTEI01218	217.322	0.470057	0.212487	2.21217	0.0269546	0.0876024	X
ASTEI01219	920.445	0.331037	0.103535	3.19734	0.00138704	0.00774262	X
ASTEI01220	705.659	0.471357	0.169111	2.78727	0.0053155	0.0234595	X
ASTEI01221	128.33	0.567372	0.26673	2.12714	0.0334086	0.104039	X
ASTEI01222	25.8449	0.44518	0.39555	1.12547	0.260389	0.45873	X
ASTEI01223	329.713	0.533559	0.188047	2.83737	0.00454873	0.0206667	X
ASTEI01224	9.36802	6.9234	1.19835	5.77745	7.58425e-09	1.54911e-07	X
ASTEI01225	8.86664	0.472241	0.68652	0.687876	0.491531	0.680637	X
ASTEI01226	849.919	0.343919	0.189043	1.81926	0.0688719	0.181174	X
ASTEI01227	104.407	0.189304	0.263964	0.717157	0.473277	0.666804	X
ASTEI01228	547.23	0.268004	0.155698	1.7213	0.0851956	0.211614	X
ASTEI01229	21.3542	-0.361462	0.641636	-0.563344	0.573201	0.743415	X
ASTEI01230	564.694	0.318581	0.27665	1.15157	0.249499	0.445762	X
ASTEI01231	2555	0.135938	0.106815	1.27265	0.203142	0.38839	X
ASTEI01232	238.287	0.370207	0.145651	2.54174	0.0110303	0.042703	X
ASTEI01233	988.289	0.441654	0.109979	4.01579	5.92464e-05	0.000507041	X
ASTEI01234	974.208	0.360316	0.11478	3.1392	0.00169412	0.00915347	X
ASTEI01235	229.048	0.761392	0.155949	4.88231	1.0485e-06	1.41201e-05	X
ASTEI01236	763.564	0.523831	0.208773	2.50909	0.0121042	0.0460928	X
ASTEI01237	1390.58	0.627435	0.161189	3.89255	9.91948e-05	0.000798367	X
ASTEI01238	617.787	0.608315	0.183501	3.31505	0.000916272	0.00546659	X
ASTEI01239	203.539	0.860954	0.17233	4.99596	5.85447e-07	8.32811e-06	X
ASTEI01240	1656.85	0.650261	0.154188	4.21732	2.47223e-05	0.00023609	X
ASTEI01241	0.296316	1.93877	3.76877	0.51443	0.606952	NA	X
ASTEI01242	376.996	0.71611	0.215459	3.32365	0.000888461	0.00532089	X
ASTEI01243	16.8082	1.0304	0.448271	2.29861	0.0215272	0.0736067	X
ASTEI01244	1124.93	1.56774	0.144621	10.8404	2.21552e-27	3.02927e-25	X
ASTEI01245	467.87	0.281569	0.182187	1.54549	0.122227	0.274074	X
ASTEI01246	223.391	0.57174	0.214571	2.66457	0.00770869	0.0319168	X
ASTEI01247	348.752	0.464932	0.273918	1.69734	0.0896315	0.21932	X
ASTEI01248	467.723	0.367831	0.24126	1.52463	0.127352	0.282568	X
ASTEI01249	1812.02	0.431576	0.140867	3.06372	0.00218607	0.0112868	X
ASTEI01250	23.6033	0.424539	0.474958	0.893845	0.371405	0.576066	X
ASTEI01251	29.4618	-0.132402	0.448822	-0.294999	0.767995	0.871303	X
ASTEI01252	52.9243	0.181651	0.276452	0.657079	0.51113	0.695673	X
ASTEI01253	38.796	0.547695	0.308854	1.77331	0.0761767	0.194856	X
ASTEI01254	84.056	0.568959	0.378831	1.50188	0.133128	0.291597	X
ASTEI01255	467.372	-0.6286	0.170854	-3.67916	0.000233999	0.00169971	X
ASTEI01256	1834.12	0.337499	0.0995927	3.38879	0.000702018	0.00433982	X
ASTEI01257	116.708	-1.85324	0.214006	-8.65972	4.72926e-18	2.971e-16	3L
ASTEI01258	3.37085	0.82086	1.10865	0.740414	0.459049	0.655596	3L
ASTEI01259	12.3746	2.22156	0.605723	3.66762	0.000244817	0.00176724	3L
ASTEI01260	56.9645	0.358706	0.903491	0.397023	0.691351	0.825614	3L
ASTEI01261	106.192	-0.00615804	1.0811	-0.00569609	0.995455	0.997585	3L
ASTEI01262	342.732	1.22279	0.79024	1.54736	0.121777	0.273327	3L
ASTEI01263	663.361	0.314468	0.158117	1.98883	0.0467205	0.135543	3L
ASTEI01264	29.9877	1.33238	0.399567	3.33456	0.000854355	0.00514472	3L
ASTEI01265	750.429	0.139153	0.119211	1.16728	0.243097	0.437349	3L
ASTEI01266	307.808	0.947956	0.279814	3.38781	0.000704525	0.004353	3L
ASTEI01267	480.987	-0.153391	0.220099	-0.696919	0.485854	0.676672	3L
ASTEI01268	1047.93	0.129393	0.105568	1.22569	0.220317	0.410801	3L
ASTEI01269	2434.01	0.228808	0.100835	2.26912	0.0232608	0.0783027	3L
ASTEI01270	1260.7	0.389725	0.154403	2.52408	0.0116001	0.0443944	3L
ASTEI01271	173.116	-0.45141	0.215868	-2.09114	0.0365156	0.112083	3L
ASTEI01272	856.548	-0.136849	0.136173	-1.00496	0.314916	0.517381	3L
ASTEI01273	470.998	-0.282157	0.175593	-1.60688	0.108081	0.251274	3L
ASTEI01274	1370.17	0.154411	0.122935	1.25604	0.209102	0.396168	3L
ASTEI01275	2.33158	-1.17191	1.63892	-0.715049	0.474579	0.667824	3L
ASTEI01276	654.143	-0.126248	0.144312	-0.874829	0.381667	0.586117	3L
ASTEI01277	272.35	-0.0640689	0.216333	-0.296159	0.767109	0.870638	3L
ASTEI01278	224.79	-0.599461	0.167859	-3.57123	0.00035531	0.00242337	3L
ASTEI01279	139.193	0.543405	0.193094	2.81419	0.00488996	0.0219341	3L
ASTEI01280	491.727	0.575963	0.129424	4.45022	8.57838e-06	9.21422e-05	3L
ASTEI01281	5.52179	0.0812567	0.817982	0.099338	0.92087	0.957362	3L
ASTEI01282	976.837	-0.371294	0.108059	-3.43603	0.00059031	0.00374895	3L
ASTEI01283	1397.32	0.037642	0.114442	0.328917	0.742218	0.85559	3L
ASTEI01284	200.542	-1.00476	0.181094	-5.54828	2.88501e-08	5.26367e-07	3L
ASTEI012841	177.606	-0.247661	0.185211	-1.33718	0.181163	0.35948	3L
ASTEI01285	214.106	-0.553777	0.160278	-3.4551	0.000550079	0.00352621	3L
ASTEI01286	493.77	-0.243793	0.168621	-1.4458	0.148232	0.314428	3L
ASTEI01287	234.136	-0.358536	0.164564	-2.1787	0.0293541	0.0938525	3L
ASTEI01288	124.87	-0.536531	0.222157	-2.4151	0.0157309	0.0568839	3L
ASTEI01289	251.766	-1.32406	0.178622	-7.4126	1.23844e-13	4.99764e-12	3L
ASTEI01290	250.453	-1.70889	0.183849	-9.2951	1.47062e-20	1.17066e-18	3L
ASTEI01291	3.95852	-0.83003	0.978381	-0.848372	0.396231	0.599047	3L
ASTEI01292	38.1002	0.0734664	0.320465	0.229249	0.818675	0.898093	3L
ASTEI01294	38.2966	0.376235	0.370259	1.01614	0.309562	0.51155	3L
ASTEI01295	150.131	1.42495	0.193931	7.34769	2.01665e-13	7.8125e-12	3L
ASTEI01296	828.698	-0.0945375	0.155227	-0.609029	0.542505	0.72123	3L
ASTEI01297	807.067	0.0553272	0.112312	0.492623	0.622279	0.780221	3L
ASTEI01298	506.11	0.026185	0.260137	0.100658	0.919822	0.957052	3L
ASTEI01299	181.034	0.564731	0.222946	2.53304	0.0113078	0.043545	3L
ASTEI01300	3.373	-0.523623	1.09155	-0.479706	0.631437	0.786657	3L
ASTEI01301	6.16067	0.549415	0.744032	0.738429	0.460254	0.65665	3L
ASTEI01302	818.629	-0.00984936	0.11654	-0.084515	0.932647	0.96443	3L
ASTEI01303	22.3718	0.315095	0.467463	0.674052	0.500278	0.68718	3L
ASTEI01304	252.748	-0.713737	0.156322	-4.56581	4.97579e-06	5.66947e-05	3L
ASTEI01305	132.429	-0.666402	0.238679	-2.79204	0.00523772	0.0231455	3L
ASTEI01306	363.657	0.0841079	0.182787	0.460143	0.645414	0.795356	3L
ASTEI01307	596.953	0.0943766	0.166531	0.566721	0.570904	0.742129	3L
ASTEI01308	372.424	0.104935	0.303965	0.345219	0.72993	0.847753	3L
ASTEI01309	519.314	-0.393581	0.461153	-0.853471	0.393398	0.596642	3L
ASTEI01310	430.407	0.0471543	0.231405	0.203774	0.83853	0.910144	3L
ASTEI01311	1133.09	-0.583444	0.147207	-3.96341	7.38859e-05	0.000617771	3L
ASTEI01312	796.792	-0.964764	0.217245	-4.4409	8.95854e-06	9.5695e-05	3L
ASTEI01313	240.125	-1.0577	0.25616	-4.12906	3.64254e-05	0.000329444	3L
ASTEI01314	80.235	-1.44066	0.285774	-5.04126	4.62485e-07	6.71037e-06	3L
ASTEI01315	16.7506	-0.841302	0.485998	-1.73108	0.083437	0.20827	3L
ASTEI01316	1584.06	-0.296783	0.143308	-2.07095	0.0383637	0.116219	3L
ASTEI01317	16.4631	1.09231	0.476845	2.29071	0.0219802	0.0748475	3L
ASTEI01318	1456.32	0.18175	0.159478	1.13966	0.25443	0.451791	3L
ASTEI01319	288.656	0.0113738	0.218246	0.0521149	0.958437	0.977959	3L
ASTEI01320	349.318	-0.10982	0.1946	-0.564339	0.572523	0.743273	3L
ASTEI01321	265.055	-0.197281	0.177966	-1.10853	0.267632	0.465771	3L
ASTEI01322	42.5766	-1.00436	0.4614	-2.17677	0.0294977	0.0942337	3L
ASTEI01323	2199.28	-0.524727	0.408694	-1.28391	0.199172	0.382807	3L
ASTEI01324	274.634	-1.46349	0.219774	-6.65906	2.7559e-11	8.27624e-10	3L
ASTEI01325	43.3472	-0.234794	0.306068	-0.767131	0.443004	0.642098	3L
ASTEI01326	0.997172	-2.0204	2.33784	-0.86422	0.387467	0.591004	3L
ASTEI01327	27.4171	-0.765068	0.369794	-2.0689	0.0385553	0.116569	3L
ASTEI01328	449.291	-0.627521	0.144096	-4.35489	1.33135e-05	0.000135966	3L
ASTEI01329	435.27	-1.10959	0.185948	-5.96721	2.41346e-09	5.3529e-08	3L
ASTEI01330	228.016	0.151842	0.186249	0.815262	0.414922	0.615353	3L
ASTEI01331	518.672	-0.316294	0.136271	-2.32106	0.0202835	0.0700071	3L
ASTEI01332	545.329	0.214128	0.13242	1.61703	0.105872	0.247176	3L
ASTEI01333	608.008	-0.668281	0.185624	-3.60019	0.000317989	0.00220637	3L
ASTEI01334	153.258	-0.255366	0.17319	-1.47449	0.140351	0.302102	3L
ASTEI01335	292.915	0.21003	0.165394	1.26988	0.204126	0.389741	3L
ASTEI01336	826.169	-0.102227	0.123666	-0.826633	0.408445	0.610304	3L
ASTEI01337	721.825	-0.145954	0.109727	-1.33016	0.183466	0.362873	3L
ASTEI01338	1465.25	0.483864	0.170316	2.84097	0.00449762	0.0204665	3L
ASTEI01339	230.634	-0.376558	0.19499	-1.93117	0.0534621	0.150263	3L
ASTEI01340	596.392	-0.104151	0.138678	-0.751029	0.452635	0.65025	3L
ASTEI01341	652.266	0.12713	0.172756	0.735891	0.461797	0.657537	3L
ASTEI01342	354.626	-0.0332236	0.182112	-0.182435	0.855241	0.919994	3L
ASTEI01343	2562.82	0.464716	0.129244	3.59564	0.000323593	0.00223761	3L
ASTEI01344	323.632	0.202171	0.12818	1.57724	0.114741	0.261835	3L
ASTEI01345	545.192	0.129506	0.156868	0.825572	0.409047	0.610889	3L
ASTEI01346	36.006	-0.417749	0.322565	-1.29509	0.19529	0.377962	3L
ASTEI01347	519.491	0.135891	0.188906	0.719359	0.47192	0.665621	3L
ASTEI01348	171.252	-0.0280315	0.162597	-0.172399	0.863124	0.923741	3L
ASTEI01349	1389.37	-0.0673039	0.151592	-0.443981	0.657056	0.803463	3L
ASTEI01350	682.825	0.37397	0.130142	2.87355	0.00405884	0.0188085	3L
ASTEI01351	464.975	0.191088	0.137747	1.38723	0.165371	0.337894	3L
ASTEI01352	990.287	0.153271	0.129894	1.17997	0.238012	0.431945	3L
ASTEI01353	698.433	-0.150719	0.114605	-1.31512	0.188471	0.368322	3L
ASTEI01354	150.716	-0.318847	0.170964	-1.865	0.0621819	0.168771	3L
ASTEI01355	522.904	0.0783557	0.139927	0.559974	0.575497	0.745146	3L
ASTEI01356	1346.44	0.432603	0.128835	3.3578	0.000785653	0.00479058	3L
ASTEI01357	139.966	-0.050464	0.245432	-0.205613	0.837093	0.909149	3L
ASTEI01358	195.044	-0.458472	0.172425	-2.65896	0.0078382	0.0323723	3L
ASTEI01359	3212.18	8.34416e-05	0.130554	0.000639134	0.99949	0.999576	3L
ASTEI01360	888.854	0.2399	0.0984134	2.43768	0.0147818	0.0541766	3L
ASTEI01361	393.021	0.422012	0.133066	3.17145	0.00151681	0.00834281	3L
ASTEI01362	2.98914	0.0397593	1.20886	0.0328898	0.973762	0.986667	3L
ASTEI01363	1.37584	-3.6919	1.85237	-1.99307	0.0462539	0.134727	3L
ASTEI01364	574.483	0.69916	0.181619	3.8496	0.000118312	0.000932218	3L
ASTEI01365	276.461	0.604892	0.143045	4.22868	2.35069e-05	0.00022597	3L
ASTEI01366	384.162	-0.174042	0.166415	-1.04583	0.29564	0.49688	3L
ASTEI01367	351.636	-0.202867	0.169793	-1.19479	0.232168	0.424521	3L
ASTEI01368	489.574	-0.16291	0.138031	-1.18025	0.237903	0.431882	3L
ASTEI01369	494.959	0.115613	0.140886	0.820617	0.411864	0.612735	3L
ASTEI01370	1072.22	0.778982	0.201203	3.87163	0.000108109	0.000861761	3L
ASTEI01371	140.464	-0.499502	0.312278	-1.59954	0.1097	0.253765	3L
ASTEI01372	89.0773	0.088467	0.23366	0.378614	0.704975	0.834425	3L
ASTEI01373	91.0601	0.572976	0.291784	1.9637	0.049565	0.142023	3L
ASTEI01374	206.284	-0.454402	0.198442	-2.28985	0.02203	0.0749948	3L
ASTEI01375	47.6134	0.0790912	0.29346	0.269512	0.787535	0.880748	3L
ASTEI01376	13.9347	0.458488	0.488453	0.938653	0.347909	0.553113	3L
ASTEI01377	1171.49	0.230521	0.148394	1.55344	0.120317	0.271099	3L
ASTEI01378	18.0461	-0.317906	0.447589	-0.710265	0.47754	0.669878	3L
ASTEI01379	104.56	-0.350054	0.253597	-1.38036	0.167477	0.340878	3L
ASTEI01380	1182.72	0.507338	0.139919	3.62594	0.000287913	0.00203288	3L
ASTEI01381	8.01833	-2.36857	0.96711	-2.44912	0.0143204	0.0527517	3L
ASTEI01382	7.17904	-1.06782	0.885252	-1.20623	0.227729	0.419838	3L
ASTEI01383	2.59045	-0.922435	1.27496	-0.723502	0.469372	0.663978	3L
ASTEI01384	3.68365	-1.98519	1.1104	-1.78781	0.0738068	0.191043	3L
ASTEI01385	51.6532	-0.0678327	0.26825	-0.252871	0.800368	0.887678	3L
ASTEI01386	275.351	0.0864997	0.242722	0.356374	0.721561	0.843999	3L
ASTEI01387	44.4207	0.104242	0.306135	0.340509	0.733473	0.849551	3L
ASTEI01388	1059.23	-0.558233	0.143111	-3.90071	9.59101e-05	0.000774612	3L
ASTEI01389	10.2868	0.651641	0.711527	0.915835	0.359753	0.565154	3L
ASTEI01390	4.74799	-1.22607	1.02368	-1.19771	0.23103	0.423105	3L
ASTEI01391	253.019	-0.100639	0.198177	-0.507827	0.611574	0.771907	3L
ASTEI01392	268.665	0.00510877	0.198909	0.0256839	0.979509	0.989615	3L
ASTEI01393	609.157	0.182041	0.177717	1.02433	0.30568	0.508208	3L
ASTEI01394	2584.61	0.0337221	0.108298	0.311381	0.755511	0.863923	3L
ASTEI01395	534.955	-0.80832	0.141509	-5.71214	1.11567e-08	2.19769e-07	3L
ASTEI01396	224.324	-0.300199	0.146266	-2.05242	0.0401293	0.120295	3L
ASTEI01397	164.741	-0.124028	0.208485	-0.594904	0.551908	0.727324	3L
ASTEI01398	967.49	0.089042	0.171274	0.519881	0.603146	0.766765	3L
ASTEI01399	193.327	-1.21803	0.237853	-5.12095	3.03998e-07	4.58245e-06	3L
ASTEI01400	2316.6	-0.143744	0.106745	-1.34661	0.178107	0.355663	3L
ASTEI01401	511.644	-1.59401	0.16062	-9.92406	3.27177e-23	3.24996e-21	3L
ASTEI01402	331.518	-1.42718	0.231156	-6.17408	6.655e-10	1.6147e-08	3L
ASTEI01403	611.256	0.404231	0.157074	2.57351	0.0100672	0.0396658	3L
ASTEI01404	454.057	-0.638732	0.185048	-3.4517	0.000557058	0.00356308	3L
ASTEI01405	1542.03	0.243046	0.129474	1.87718	0.0604936	0.165114	3L
ASTEI01406	210.175	-0.2753	0.158408	-1.73792	0.0822253	0.206264	3L
ASTEI01407	282.458	0.0350138	0.137351	0.254922	0.798784	0.887181	3L
ASTEI01408	927.259	-0.160124	0.159457	-1.00418	0.315292	0.517821	3L
ASTEI01409	35.28	0.194576	0.39503	0.49256	0.622324	0.780221	3L
ASTEI01410	19.8022	1.71241	0.438663	3.90371	9.47304e-05	0.000766683	3L
ASTEI01411	34.2718	-0.354648	0.364812	-0.972141	0.33098	0.535	3L
ASTEI01412	584.297	0.263743	0.129138	2.04233	0.0411191	0.122661	3L
ASTEI01413	119.883	-0.834329	0.285192	-2.9255	0.00343901	0.016367	3L
ASTEI01414	186.295	-0.519604	0.241948	-2.14759	0.0317463	0.100015	3L
ASTEI01415	499.254	0.336987	0.136442	2.46983	0.0135179	0.0503864	3L
ASTEI01416	153.248	-1.39264	0.635739	-2.19058	0.0284822	0.0916124	3L
ASTEI01417	1137.9	0.134801	0.112115	1.20234	0.229232	0.42134	3L
ASTEI01418	866.853	0.478363	0.132767	3.60304	0.00031452	0.00218491	3L
ASTEI01419	958.551	-0.378743	0.121457	-3.11833	0.0018188	0.00970528	3L
ASTEI01420	427.891	-0.134317	0.193255	-0.695027	0.487039	0.676942	3L
ASTEI01421	295.44	-0.418674	0.155044	-2.70035	0.00692673	0.0292311	3L
ASTEI01422	792.796	0.538193	0.108552	4.95794	7.1244e-07	9.96388e-06	3L
ASTEI01423	223.61	-0.0525014	0.143794	-0.365115	0.715026	0.840201	3L
ASTEI01424	1557.08	0.501477	0.16786	2.98747	0.00281296	0.0139234	3L
ASTEI01425	554.139	0.525856	0.137886	3.81371	0.000136898	0.00105716	3L
ASTEI01426	59.9331	0.0938672	0.274741	0.341657	0.732609	0.849485	3L
ASTEI01427	1182.42	0.199291	0.16729	1.1913	0.233537	0.426153	3L
ASTEI01428	770.69	0.0490652	0.141934	0.345691	0.729575	0.847658	3L
ASTEI01429	468.897	-0.134345	0.121798	-1.10302	0.270019	0.468649	3L
ASTEI01430	893.897	0.129107	0.139332	0.926613	0.354127	0.559574	3L
ASTEI01431	332.573	-0.255404	0.137958	-1.85131	0.0641245	0.172597	3L
ASTEI01432	66.2837	-0.298129	0.293377	-1.0162	0.309536	0.51155	3L
ASTEI01433	2118.97	0.165953	0.196408	0.84494	0.398144	0.600881	3L
ASTEI01434	225.53	-0.134778	0.142336	-0.946902	0.343689	0.548524	3L
ASTEI01435	997.773	0.187793	0.101036	1.85868	0.0630722	0.17063	3L
ASTEI01436	304.777	-0.30623	0.204691	-1.49606	0.134638	0.29353	3L
ASTEI01437	1131.45	0.383596	0.0931517	4.11797	3.82225e-05	0.000344625	3L
ASTEI01438	903.213	-0.133354	0.108552	-1.22848	0.219266	0.409564	3L
ASTEI01439	1572.62	0.29334	0.177005	1.65724	0.0974709	0.23261	3L
ASTEI01440	342.839	0.238756	0.166206	1.43651	0.150859	0.318164	3L
ASTEI01441	1730.74	-0.191546	0.124997	-1.53241	0.125421	0.279349	3L
ASTEI01442	799.011	-0.3119	0.111424	-2.79923	0.0051224	0.0227919	3L
ASTEI01443	284.277	0.305618	0.144463	2.11555	0.0343831	0.10676	3L
ASTEI01444	411.506	0.406366	0.137213	2.96157	0.00306075	0.0148682	3L
ASTEI01445	183.278	0.375284	0.160669	2.33576	0.0195038	0.0678736	3L
ASTEI01446	988.496	0.177811	0.125791	1.41354	0.157496	0.327505	3L
ASTEI01447	58.7771	0.27344	0.315422	0.866904	0.385994	0.58999	3L
ASTEI01448	1292.64	0.239065	0.16945	1.41082	0.158296	0.328531	3L
ASTEI01449	652.176	-0.057311	0.133242	-0.430126	0.667104	0.809383	3L
ASTEI01450	643.159	-0.159537	0.129969	-1.2275	0.219635	0.410026	3L
ASTEI01451	74.1831	-0.0820307	0.308529	-0.265877	0.790334	0.882186	3L
ASTEI01453	2049.17	0.226684	0.145844	1.55429	0.120115	0.270915	3L
ASTEI01454	88.0192	0.27267	0.211716	1.2879	0.19778	0.381324	3L
ASTEI01455	37.4883	0.238472	0.353035	0.675492	0.499363	0.686898	3L
ASTEI01456	3079	-0.286915	0.164413	-1.74509	0.0809686	0.203771	3L
ASTEI01457	794.843	-0.259142	0.160954	-1.61004	0.10739	0.249918	3L
ASTEI01458	289.893	-1.67842	0.180632	-9.29193	1.51513e-20	1.19788e-18	3L
ASTEI01459	159.005	-0.0653911	0.202039	-0.323655	0.746199	0.857881	3L
ASTEI01460	341.851	0.358486	0.181983	1.96989	0.0488513	0.140254	3L
ASTEI01461	698.589	-0.101579	0.150246	-0.676087	0.498985	0.686753	3L
ASTEI01462	717.483	0.176788	0.150719	1.17296	0.240812	0.434718	3L
ASTEI01463	1210.33	-0.168739	0.131977	-1.27854	0.201059	0.385602	3L
ASTEI01464	199.819	-1.87235	0.245479	-7.62732	2.39682e-14	1.0495e-12	3L
ASTEI01465	5081.33	0.0655947	0.134283	0.488481	0.625209	0.782892	3L
ASTEI01466	5373.3	0.17927	0.12638	1.41849	0.156047	0.325539	3L
ASTEI01467	8.74493	-0.58228	0.798421	-0.729289	0.465825	0.660624	3L
ASTEI01468	627.887	-0.434412	0.124369	-3.49293	0.000477755	0.0031441	3L
ASTEI01469	336.211	0.0160092	0.135301	0.118323	0.905812	0.948751	3L
ASTEI01470	806.766	-0.376001	0.122469	-3.07018	0.00213933	0.0110848	3L
ASTEI01471	200.376	-0.686703	0.327044	-2.09973	0.0357529	0.110159	3L
ASTEI01472	107.537	-0.440975	0.244796	-1.8014	0.0716399	0.186765	3L
ASTEI01473	626.05	0.310145	0.12368	2.50764	0.0121539	0.0462434	3L
ASTEI01474	552.785	-0.0925923	0.139775	-0.662439	0.50769	0.692857	3L
ASTEI01475	521.433	-0.387173	0.194312	-1.99253	0.0463126	0.134804	3L
ASTEI01476	797.114	-0.136591	0.131103	-1.04186	0.297478	0.498902	3L
ASTEI01477	531.506	0.101166	0.134436	0.752518	0.451739	0.649365	3L
ASTEI01478	456.54	-0.0352786	0.117513	-0.30021	0.764017	0.868402	3L
ASTEI01479	161.91	-1.59478	0.237381	-6.71824	1.83929e-11	5.74482e-10	3L
ASTEI01480	675.918	0.176955	0.103634	1.70749	0.0877308	0.216378	3L
ASTEI01481	638.962	0.195258	0.125714	1.55319	0.120378	0.27113	3L
ASTEI01482	3308.81	-0.211482	0.141872	-1.49065	0.136053	0.295588	3L
ASTEI01483	440.856	-0.108729	0.134927	-0.805842	0.420334	0.620648	3L
ASTEI01484	282.376	0.684014	0.191896	3.56449	0.000364559	0.00247772	3L
ASTEI01485	75.6873	-0.0419826	0.487131	-0.0861834	0.931321	0.963886	3L
ASTEI01486	861.113	0.279457	0.160873	1.73714	0.0823633	0.206566	3L
ASTEI01487	439.078	-0.554244	0.207662	-2.66897	0.00760852	0.0315582	3L
ASTEI01488	3.352	-1.07784	1.05595	-1.02073	0.30738	0.509459	3L
ASTEI01489	190.123	1.54803	0.2031	7.62202	2.49746e-14	1.0871e-12	3L
ASTEI01490	356.842	-0.370274	0.15278	-2.42358	0.0153684	0.0559033	3L
ASTEI01491	215.975	0.0504859	0.154459	0.326856	0.743777	0.856428	3L
ASTEI01492	2150.79	-0.277086	0.127808	-2.16798	0.0301601	0.0959542	3L
ASTEI01493	1224.84	0.0427277	0.11634	0.367265	0.713421	0.839379	3L
ASTEI01494	1763.68	0.0648639	0.105676	0.613802	0.539346	0.718922	3L
ASTEI01495	196.254	-0.0472895	0.168055	-0.281392	0.77841	0.876213	3L
ASTEI01496	428.664	0.295036	0.133155	2.21573	0.0267098	0.0870746	3L
ASTEI01497	617.929	0.175864	0.176644	0.995587	0.319451	0.521847	3L
ASTEI01498	14.7298	-0.211788	0.486696	-0.435154	0.663451	0.806804	3L
ASTEI01499	984.4	0.121584	0.12371	0.982808	0.325702	0.528879	3L
ASTEI01500	597.299	0.147942	0.133813	1.10559	0.268903	0.46733	3L
ASTEI01501	74.1093	-0.950636	0.312264	-3.04434	0.00233195	0.0119326	3L
ASTEI01502	311.539	-0.395347	0.181843	-2.17411	0.0296966	0.094713	3L
ASTEI01503	205.782	0.0190662	0.160679	0.11866	0.905544	0.948751	3L
ASTEI01504	1725.1	0.174404	0.131989	1.32135	0.186384	0.366389	3L
ASTEI01505	255.134	-0.772701	0.171828	-4.49696	6.89333e-06	7.56508e-05	3L
ASTEI01506	119.486	-0.261493	0.228709	-1.14335	0.252894	0.44996	3L
ASTEI01507	469.019	0.406485	0.127838	3.17969	0.00147435	0.00814782	3L
ASTEI01508	400.295	-0.277081	0.175018	-1.58316	0.113385	0.259658	3L
ASTEI01509	1601.89	-0.41835	0.11332	-3.69176	0.000222707	0.00162276	3L
ASTEI01510	12.5021	-2.34781	0.658597	-3.56487	0.000364039	0.00247563	3L
ASTEI01511	8.80089	1.05517	0.618243	1.70672	0.0878735	0.216507	3L
ASTEI01512	138.099	-0.45979	0.198244	-2.31932	0.0203778	0.0702553	3L
ASTEI01513	149.054	0.0541433	0.209194	0.258819	0.795775	0.88578	3L
ASTEI01514	121.854	-0.672377	0.277495	-2.42302	0.0153921	0.0559721	3L
ASTEI01515	244.589	0.198476	0.213513	0.929574	0.352592	0.557632	3L
ASTEI01516	357.321	-0.39162	0.156089	-2.50896	0.0121089	0.0460954	3L
ASTEI01517	1834.62	0.113071	0.129478	0.873284	0.382508	0.587021	3L
ASTEI01518	482.16	-0.21409	0.123441	-1.73434	0.0828573	0.207224	3L
ASTEI01519	712.733	-0.190438	0.137556	-1.38445	0.166222	0.338977	3L
ASTEI01520	198.946	-0.145013	0.170052	-0.85276	0.393792	0.596773	3L
ASTEI01521	884.831	-0.192928	0.140796	-1.37027	0.170602	0.345003	3L
ASTEI01522	122.215	-0.185564	0.203153	-0.91342	0.361022	0.566072	3L
ASTEI01523	375.418	-0.484785	0.148887	-3.25606	0.00112972	0.00652238	3L
ASTEI01524	300.755	-0.0767803	0.141015	-0.544484	0.586108	0.753345	3L
ASTEI01525	69.0459	0.0372751	0.276924	0.134604	0.892925	0.941442	3L
ASTEI01526	1115.11	0.487657	0.138617	3.51802	0.000434788	0.00289097	3L
ASTEI01527	107.417	0.302478	0.208252	1.45246	0.146374	0.311511	3L
ASTEI01528	217.393	-0.314732	0.171229	-1.83807	0.0660516	0.176228	3L
ASTEI01529	5.87334	-0.805148	0.780428	-1.03168	0.302224	0.504155	3L
ASTEI01530	3279.37	-0.333336	0.132222	-2.52103	0.0117011	0.0447043	3L
ASTEI01531	500.084	0.602694	0.216793	2.78005	0.00543512	0.0238997	3L
ASTEI01532	203.525	-0.901026	0.20189	-4.46296	8.08362e-06	8.7231e-05	3L
ASTEI01533	751.126	-0.310361	0.126964	-2.44448	0.0145061	0.0533305	3L
ASTEI01534	974.665	0.122172	0.118165	1.03391	0.301178	0.503132	3L
ASTEI01535	810.146	0.0503589	0.114516	0.439753	0.660116	0.805108	3L
ASTEI01536	631.093	0.0375512	0.161816	0.232061	0.816491	0.89658	3L
ASTEI01537	1255.54	0.224487	0.0976192	2.29962	0.0214695	0.0734311	3L
ASTEI01538	1680.56	-0.139158	0.103411	-1.34568	0.178406	0.356015	3L
ASTEI01539	521.87	0.396663	0.159109	2.49303	0.0126657	0.0477768	3L
ASTEI01540	1134.02	0.0287002	0.118747	0.241693	0.809018	0.892386	3L
ASTEI01541	456.417	-0.191785	0.136862	-1.40131	0.161122	0.332478	3L
ASTEI01542	255.741	-0.323815	0.155354	-2.08436	0.0371272	0.113558	3L
ASTEI01543	608.862	-0.00521346	0.170394	-0.0305965	0.975591	0.987487	3L
ASTEI01544	404.552	-0.0902274	0.185698	-0.485884	0.62705	0.784031	3L
ASTEI01545	219.803	-0.211157	0.196898	-1.07242	0.28353	0.483804	3L
ASTEI01546	1408.97	0.071499	0.119603	0.597804	0.549971	0.726382	3L
ASTEI01547	886.193	0.0820819	0.102863	0.797974	0.424885	0.624749	3L
ASTEI01548	474.117	-0.0805199	0.135522	-0.594146	0.552414	0.727662	3L
ASTEI01549	664.814	-0.194454	0.107389	-1.81075	0.0701801	0.183867	3L
ASTEI01550	291.617	-0.167984	0.190134	-0.883504	0.376964	0.581507	3L
ASTEI01551	383.918	-0.0421809	0.18207	-0.231674	0.816791	0.896811	3L
ASTEI01552	16.0931	-0.461001	0.50847	-0.906643	0.364595	0.569426	3L
ASTEI01553	534.639	-0.353215	0.160514	-2.20053	0.0277693	0.0897627	3L
ASTEI01554	152.603	0.0933718	0.187705	0.497439	0.618879	0.777808	3L
ASTEI01555	470.717	0.0940411	0.176207	0.533696	0.593552	0.759804	3L
ASTEI01556	438.34	0.147531	0.132519	1.11328	0.265588	0.463478	3L
ASTEI01557	263.228	0.00521418	0.203586	0.0256117	0.979567	0.989615	3L
ASTEI01558	166.218	-0.791316	0.317005	-2.49623	0.0125522	0.0474411	3L
ASTEI01559	331.046	-0.205071	0.148301	-1.3828	0.166727	0.33971	3L
ASTEI01560	212.517	-0.184418	0.152545	-1.20894	0.226685	0.418712	3L
ASTEI01561	474.356	-0.382364	0.156311	-2.44618	0.014438	0.0531176	3L
ASTEI01562	284.357	-0.366004	0.141848	-2.58026	0.00987271	0.0390274	3L
ASTEI01563	142.36	-0.501692	0.18412	-2.72482	0.0064337	0.0274899	3L
ASTEI01564	985.899	0.0418237	0.113524	0.368414	0.712565	0.838625	3L
ASTEI01565	534.664	-0.115923	0.14409	-0.80452	0.421097	0.62138	3L
ASTEI01566	214.643	-0.189369	0.143711	-1.3177	0.187604	0.36774	3L
ASTEI01567	133.968	-1.53664	0.235943	-6.51274	7.37943e-11	2.05883e-09	3L
ASTEI01568	131.884	-1.06628	0.21294	-5.00743	5.51603e-07	7.87558e-06	3L
ASTEI01569	159.185	-2.23803	0.271688	-8.23751	1.75832e-16	9.63927e-15	3L
ASTEI01570	851.668	-0.146662	0.123669	-1.18592	0.235653	0.429035	3L
ASTEI01571	257.259	0.0322089	0.16274	0.197916	0.843111	0.912835	3L
ASTEI01572	738.245	-0.144684	0.109238	-1.32449	0.185342	0.365118	3L
ASTEI01573	608.198	-0.319835	0.124671	-2.56544	0.0103045	0.040391	3L
ASTEI01574	497.197	0.242581	0.156785	1.54722	0.121809	0.273347	3L
ASTEI01575	992.177	-0.563366	0.137979	-4.08298	4.44612e-05	0.000392949	3L
ASTEI01576	742.316	-0.0621169	0.11512	-0.539584	0.589484	0.755596	3L
ASTEI01577	203.136	0.806803	0.168103	4.79944	1.59107e-06	2.0546e-05	3L
ASTEI01578	958.398	0.16492	0.102894	1.60281	0.108977	0.252548	3L
ASTEI01579	77.7746	0.614377	0.220732	2.78336	0.0053799	0.0236928	3L
ASTEI01580	57.9912	0.0198806	0.332197	0.0598459	0.952278	0.974155	3L
ASTEI01581	266.474	0.607087	0.210354	2.88603	0.00390138	0.018195	3L
ASTEI01582	0.746156	-1.5077	2.55527	-0.590037	0.555166	0.729055	3L
ASTEI01583	680.526	0.106675	0.23167	0.460459	0.645187	0.795198	3L
ASTEI01584	492.163	-0.852154	0.245261	-3.47447	0.000511856	0.00332304	3L
ASTEI01585	6.97954	0.893896	0.919427	0.972231	0.330936	0.535	3L
ASTEI01586	564.747	0.0952865	0.145474	0.655007	0.512463	0.696672	3L
ASTEI01587	566.842	-1.79984	0.145767	-12.3474	5.03232e-35	1.16971e-32	3L
ASTEI01588	230.002	0.350973	0.18232	1.92504	0.0542249	0.15171	3L
ASTEI01589	391.047	-0.331098	0.154313	-2.14563	0.0319026	0.100398	3L
ASTEI01590	6.47305	-1.38287	0.803778	-1.72046	0.0853488	0.211903	3L
ASTEI01591	1444.96	0.0430429	0.121943	0.352974	0.724108	0.844772	3L
ASTEI01592	733.683	-1.08828	0.192505	-5.65327	1.57422e-08	2.99785e-07	3L
ASTEI01593	870.997	0.0486606	0.132169	0.36817	0.712747	0.838755	3L
ASTEI01594	1142.14	-0.221078	0.143009	-1.54591	0.122127	0.273956	3L
ASTEI01595	13.5219	-0.663403	0.605879	-1.09494	0.273542	0.47273	3L
ASTEI01596	611.382	-0.766844	0.140944	-5.44076	5.30551e-08	9.28625e-07	3L
ASTEI01597	473.807	-0.767504	0.200163	-3.83439	0.000125876	0.000981172	3L
ASTEI01598	435.897	0.108879	0.117863	0.923776	0.355603	0.56119	3L
ASTEI01599	450.509	-0.129407	0.145644	-0.888513	0.374265	0.579266	3L
ASTEI01600	796.528	0.500122	0.129914	3.84964	0.000118293	0.000932218	3L
ASTEI01601	127.171	-0.234251	0.215249	-1.08828	0.276471	0.47581	3L
ASTEI01602	379.29	-0.213375	0.170961	-1.24809	0.211999	0.400236	3L
ASTEI01603	487.122	0.794155	0.148568	5.34539	9.02246e-08	1.52411e-06	3L
ASTEI01604	256.932	-2.68132	0.191309	-14.0156	1.25053e-44	5.19057e-42	3L
ASTEI01605	669.781	-0.821242	0.155325	-5.28725	1.24171e-07	2.0337e-06	3L
ASTEI01606	843.232	-1.36004	0.207879	-6.54243	6.05256e-11	1.71568e-09	3L
ASTEI01607	1497.22	0.0372684	0.129619	0.287522	0.773713	0.874203	3L
ASTEI01608	133.652	0.258091	0.195031	1.32333	0.185725	0.365723	3L
ASTEI01609	415.207	-0.784069	0.446923	-1.75437	0.0793668	0.200696	3L
ASTEI01610	300.93	-0.326061	0.279525	-1.16648	0.24342	0.437794	3L
ASTEI01611	1246.38	0.0506536	0.116344	0.435379	0.663288	0.806774	3L
ASTEI01612	106.3	-0.41451	0.214768	-1.93004	0.0536023	0.150511	3L
ASTEI01613	16.8287	-2.23623	0.538804	-4.15035	3.31969e-05	0.00030403	3L
ASTEI01614	151.555	-0.0767287	0.203762	-0.37656	0.706501	0.835645	3L
ASTEI01615	617.948	-1.20128	0.127246	-9.44063	3.70545e-21	3.14341e-19	3L
ASTEI01616	854.328	0.0751923	0.106802	0.704032	0.481413	0.673924	3L
ASTEI01617	1792.65	-0.207001	0.122179	-1.69424	0.0902189	0.220047	3L
ASTEI01618	2908.07	-0.457574	0.102285	-4.4735	7.69494e-06	8.3502e-05	3L
ASTEI01619	37.0114	-1.80651	0.452622	-3.99121	6.57383e-05	0.000554837	3L
ASTEI01620	1496.35	0.402353	0.15428	2.60795	0.00910875	0.0364664	3L
ASTEI01621	1414.06	-0.390496	0.127134	-3.07154	0.00212957	0.0110441	3L
ASTEI01622	1160.11	-0.036195	0.129206	-0.280135	0.779374	0.876213	3L
ASTEI01623	1104.13	-0.263918	0.15703	-1.68068	0.0928247	0.224378	3L
ASTEI01624	324.408	-0.851944	0.198396	-4.29416	1.75356e-05	0.000174935	3L
ASTEI01625	131.743	-0.262387	0.236015	-1.11174	0.266252	0.464146	3L
ASTEI01626	503.225	-0.240884	0.162679	-1.48073	0.138678	0.299632	3L
ASTEI01627	769.703	-0.169545	0.138033	-1.22829	0.219339	0.409635	3L
ASTEI01628	1209.59	-0.360492	0.177424	-2.03181	0.0421731	0.12529	3L
ASTEI01629	676.738	-2.50846	0.644324	-3.89316	9.89458e-05	0.000796915	3R
ASTEI01630	575.823	0.212761	0.131429	1.61883	0.105484	0.24637	3R
ASTEI01631	2174.58	-0.155483	0.0975432	-1.59399	0.110937	0.255569	3R
ASTEI01632	288.035	-0.0882942	0.292339	-0.302026	0.762632	0.867676	3R
ASTEI01633	543.039	0.10967	0.197917	0.554122	0.579495	0.74774	3R
ASTEI01634	0.239131	-1.30415	3.81374	-0.34196	0.732381	NA	3R
ASTEI01635	0.292154	0.295097	3.81694	0.0773126	0.938375	NA	3R
ASTEI01636	1.56146	-1.71847	1.83133	-0.938377	0.34805	0.553113	3R
ASTEI01637	1.33248	-3.65285	2.03658	-1.79362	0.0728732	0.189216	3R
ASTEI01638	377.292	0.0699496	0.170077	0.411282	0.680866	0.818137	3R
ASTEI01639	790.081	0.42314	0.154902	2.73167	0.00630148	0.0269892	3R
ASTEI01640	24.8037	-1.49041	0.557964	-2.67116	0.00755905	0.0313755	3R
ASTEI01641	1171.99	0.452909	0.112948	4.00989	6.07466e-05	0.000518734	3R
ASTEI01642	1017.36	-0.173215	0.146168	-1.18504	0.236002	0.429408	3R
ASTEI01643	190.289	-0.365876	0.161372	-2.26728	0.023373	0.0785772	3R
ASTEI01644	762.062	-0.0383351	0.130603	-0.293523	0.769122	0.8722	3R
ASTEI01645	2961.82	0.373173	0.0891037	4.18808	2.81323e-05	0.000264312	3R
ASTEI01646	430.511	0.254701	0.272334	0.935253	0.349658	0.554396	3R
ASTEI01647	1061.91	0.0579362	0.127341	0.454969	0.649131	0.797737	3R
ASTEI01648	160.955	0.249817	0.194499	1.28441	0.198999	0.382718	3R
ASTEI01649	650.92	-0.211087	0.13378	-1.57786	0.114598	0.261713	3R
ASTEI01650	130.453	-0.201136	0.194683	-1.03315	0.301536	0.503441	3R
ASTEI01651	57.4975	-0.132627	0.27231	-0.487043	0.626228	0.783702	3R
ASTEI01652	1186.14	-0.0728991	0.14202	-0.513302	0.60774	0.768977	3R
ASTEI01653	58.528	-0.161279	0.473187	-0.340836	0.733227	0.849523	3R
ASTEI01654	564.012	0.562046	0.187735	2.99383	0.00275495	0.0136829	3R
ASTEI01655	29.1141	-0.96055	0.365656	-2.62692	0.00861606	0.0348541	3R
ASTEI01656	3.57156	-0.903826	1.07023	-0.844513	0.398383	0.600987	3R
ASTEI01657	118.266	-0.348608	0.286154	-1.21826	0.223127	0.414577	3R
ASTEI01658	0.438529	2.50675	3.25223	0.770781	0.440837	NA	3R
ASTEI01659	619.091	0.0900869	0.140038	0.643304	0.520027	0.702762	3R
ASTEI01660	19.1953	-0.688065	0.459013	-1.49901	0.13387	0.292672	3R
ASTEI01661	460.044	-1.46273	0.259925	-5.62749	1.82847e-08	3.44974e-07	3R
ASTEI01662	39.9406	-1.32413	0.364492	-3.63281	0.000280357	0.00199041	3R
ASTEI01663	272.412	-0.0838774	0.18167	-0.461703	0.644294	0.795101	3R
ASTEI01664	1281.21	0.0529584	0.0918038	0.576865	0.56403	0.736204	3R
ASTEI01665	1979.8	0.152999	0.131944	1.15958	0.246221	0.441469	3R
ASTEI01666	59.7679	0.0227563	0.324428	0.0701427	0.94408	0.970426	3R
ASTEI01667	1967.67	0.420185	0.215692	1.94808	0.0514056	0.14585	3R
ASTEI01668	213.837	-0.0118479	0.156834	-0.0755444	0.939782	0.967679	3R
ASTEI01669	1370.65	-0.0348074	0.100072	-0.347824	0.727973	0.846727	3R
ASTEI01670	3.2079	-1.01254	1.24018	-0.816442	0.414248	0.614864	3R
ASTEI01671	1560.01	-0.341126	0.143551	-2.37634	0.0174853	0.0619366	3R
ASTEI01672	36.587	0.551087	0.37476	1.47051	0.141425	0.303501	3R
ASTEI01673	10.2619	-0.296316	0.577367	-0.51322	0.607798	0.768977	3R
ASTEI01674	15.4979	-0.982433	0.591392	-1.66122	0.0966691	0.231218	3R
ASTEI01675	3873.23	-0.136571	0.144688	-0.9439	0.345221	0.550231	3R
ASTEI01676	1431.66	-0.322533	0.122137	-2.64075	0.00827221	0.0337451	3R
ASTEI01677	267.012	-0.444267	0.205044	-2.16669	0.0302585	0.0962147	3R
ASTEI01678	2746.1	0.64263	0.124594	5.15779	2.49879e-07	3.83633e-06	3R
ASTEI01679	391.46	-1.04923	0.210704	-4.97966	6.36968e-07	8.99494e-06	3R
ASTEI01680	309.934	-0.162125	0.166837	-0.971755	0.331173	0.535162	3R
ASTEI01681	276.969	0.717526	0.200349	3.58138	0.000341781	0.00234624	3R
ASTEI01682	58.6056	0.25903	0.26752	0.968264	0.332913	0.536706	3R
ASTEI01683	399.398	1.03929	0.223254	4.6552	3.2367e-06	3.87005e-05	3R
ASTEI01684	167.421	-0.207497	0.176735	-1.17405	0.240373	0.434453	3R
ASTEI01685	338.177	-0.134923	0.152268	-0.886088	0.37557	0.58044	3R
ASTEI01686	434.773	-0.175819	0.198396	-0.886205	0.375507	0.58044	3R
ASTEI01687	281.685	0.479596	0.140089	3.42351	0.000618189	0.00390043	3R
ASTEI01688	839.491	-0.129571	0.142489	-0.909341	0.36317	0.568071	3R
ASTEI01689	22.6203	-1.89695	0.781029	-2.42878	0.0151498	0.0552466	3R
ASTEI01690	145.774	-0.054892	0.222848	-0.246321	0.805434	0.890567	3R
ASTEI01691	459.164	0.214204	0.153214	1.39808	0.16209	0.333891	3R
ASTEI01692	0.562322	-2.39282	2.39838	-0.997681	0.318434	NA	3R
ASTEI01693	362.839	-0.501644	0.147164	-3.40875	0.000652612	0.00407365	3R
ASTEI01694	967.29	-0.119082	0.137449	-0.86637	0.386287	0.590093	3R
ASTEI01695	69.9903	0.0692993	0.231112	0.299852	0.76429	0.868457	3R
ASTEI01696	23.5915	-0.215921	0.380265	-0.567816	0.57016	0.74154	3R
ASTEI01697	355.09	0.435361	0.156706	2.7782	0.00546618	0.0239909	3R
ASTEI01698	1.03962	-0.939715	1.9356	-0.48549	0.627329	0.784189	3R
ASTEI01699	8.18454	-0.24083	0.641831	-0.375224	0.707494	0.836044	3R
ASTEI01700	210.561	-2.61009	0.2574	-10.1402	3.66357e-24	3.97925e-22	3R
ASTEI01701	1057.29	-0.386455	0.099474	-3.88499	0.000102335	0.000820799	3R
ASTEI01702	454.346	-0.312755	0.173427	-1.80338	0.0713279	0.186123	3R
ASTEI01703	648.776	-0.116703	0.158103	-0.738148	0.460425	0.656813	3R
ASTEI01704	396.528	-0.0488643	0.160694	-0.304082	0.761065	0.866861	3R
ASTEI01705	3606.58	-0.0463582	0.117532	-0.394431	0.693263	0.827048	3R
ASTEI01706	375.824	-3.11727	0.157711	-19.7657	5.87359e-87	1.70657e-83	3R
ASTEI01707	1188.87	-0.345208	0.187408	-1.84201	0.0654734	0.1752	3R
ASTEI01708	178.919	-0.197294	0.17116	-1.15269	0.249037	0.44521	3R
ASTEI01709	297.781	-0.205326	0.152235	-1.34874	0.17742	0.354724	3R
ASTEI01710	1298.83	-1.07288	0.150511	-7.12825	1.0165e-12	3.64622e-11	3R
ASTEI01711	756.695	-0.220419	0.119636	-1.84242	0.0654132	0.175185	3R
ASTEI01712	97.9804	-0.226243	0.26521	-0.853069	0.393621	0.596669	3R
ASTEI01713	1034.99	0.024334	0.123972	0.196286	0.844386	0.913645	3R
ASTEI01714	186.152	-0.841798	0.275518	-3.05532	0.00224817	0.0115765	3R
ASTEI01715	325.765	0.71085	0.151883	4.68025	2.86524e-06	3.46873e-05	3R
ASTEI01716	57.4807	1.41573	0.302757	4.67611	2.92369e-06	3.52481e-05	3R
ASTEI01717	1.65086	-1.81192	1.68341	-1.07634	0.281775	0.481586	3R
ASTEI01718	867.317	-0.345094	0.16004	-2.1563	0.0310602	0.0981194	3R
ASTEI01719	367.494	0.299834	0.174646	1.71681	0.0860133	0.213144	3R
ASTEI017191	51.0025	-0.441724	0.331292	-1.33334	0.182421	0.361607	3R
ASTEI017192	281.464	0.0281217	0.235461	0.119432	0.904933	0.948751	3R
ASTEI01720	2109.1	0.0262083	0.0929933	0.28183	0.778074	0.876213	3R
ASTEI01722	51.3676	-0.00727754	0.336763	-0.0216103	0.982759	0.991374	3R
ASTEI01723	1901.55	0.239982	0.148933	1.61135	0.107104	0.249402	3R
ASTEI01724	1055.73	-0.159706	0.152162	-1.04958	0.293913	0.495365	3R
ASTEI01725	1904.09	-0.227995	0.142537	-1.59955	0.109698	0.253765	3R
ASTEI01727	1094.42	-0.144171	0.126214	-1.14228	0.253338	0.450577	3R
ASTEI01728	88.353	-0.315967	0.219676	-1.43833	0.15034	0.317394	3R
ASTEI01729	162.912	-0.0895792	0.163979	-0.546286	0.58487	0.752369	3R
ASTEI01730	1773.86	-0.0312129	0.119784	-0.260576	0.79442	0.885178	3R
ASTEI01731	468.581	-0.313888	0.220228	-1.42529	0.154075	0.322699	3R
ASTEI01732	471.711	0.373093	0.217207	1.71768	0.0858547	0.212842	3R
ASTEI01733	99.608	-0.462814	0.252185	-1.83522	0.0664731	0.176947	3R
ASTEI01734	1172.6	0.307508	0.113421	2.7112	0.00670393	0.0284354	3R
ASTEI01735	136.338	0.360063	0.206553	1.7432	0.0812979	0.204423	3R
ASTEI01736	102.383	-0.174259	0.262729	-0.663263	0.507162	0.692625	3R
ASTEI01737	113.076	-0.0291218	0.206196	-0.141234	0.887685	0.938392	3R
ASTEI01738	246.101	-0.256726	0.180188	-1.42476	0.154225	0.322898	3R
ASTEI01739	2314.48	-0.100934	0.109131	-0.924886	0.355025	0.560463	3R
ASTEI01740	2.58007	-2.5556	1.63493	-1.56313	0.118022	0.26764	3R
ASTEI01741	393.898	-0.0660809	0.197055	-0.335342	0.737367	0.851604	3R
ASTEI01742	124.268	0.00330096	0.206283	0.0160021	0.987233	0.993817	3R
ASTEI01743	308.778	0.111774	0.136737	0.81744	0.413677	0.614629	3R
ASTEI01744	468.436	0.0226253	0.13227	0.171054	0.864181	0.924306	3R
ASTEI01745	265.718	-0.59405	0.209248	-2.83898	0.00452584	0.0205788	3R
ASTEI01746	1.6965	-4.00602	1.8165	-2.20535	0.0274294	0.0888473	3R
ASTEI01747	920.722	0.44758	0.162967	2.74645	0.00602447	0.0259224	3R
ASTEI01748	258.272	0.488846	0.159956	3.05613	0.00224217	0.0115508	3R
ASTEI01749	87.0972	0.236712	0.24211	0.977703	0.328221	0.532169	3R
ASTEI01750	291.358	-0.130144	0.151603	-0.858448	0.390645	0.594251	3R
ASTEI01751	319.041	-0.214632	0.145124	-1.47896	0.139151	0.300429	3R
ASTEI01752	56.346	-0.178995	0.346406	-0.516722	0.60535	0.767719	3R
ASTEI01753	0.426447	-0.457988	2.97567	-0.153911	0.87768	NA	3R
ASTEI01754	313.482	0.793246	0.228294	3.47467	0.000511491	0.00332284	3R
ASTEI01755	233.922	0.110409	0.16765	0.658571	0.510171	0.694895	3R
ASTEI01756	40.2119	0.937114	0.337267	2.77855	0.00546022	0.0239738	3R
ASTEI01757	226.462	0.0471761	0.227217	0.207626	0.835521	0.90845	3R
ASTEI01758	1.44861	1.00364	1.5123	0.663655	0.506911	0.692477	3R
ASTEI01759	132.388	-0.354756	0.25924	-1.36845	0.171173	0.345917	3R
ASTEI01760	482.869	0.166188	0.146517	1.13425	0.256688	0.454275	3R
ASTEI01761	640.637	-0.0129506	0.152129	-0.0851295	0.932158	0.964091	3R
ASTEI01762	506.647	0.59446	0.23627	2.51602	0.011869	0.0452859	3R
ASTEI01763	453.843	-0.277922	0.123456	-2.25119	0.0243736	0.080974	3R
ASTEI01764	564.804	-0.122661	0.137066	-0.894903	0.370839	0.575496	3R
ASTEI01765	278.531	0.0786378	0.186666	0.421276	0.673554	0.813759	3R
ASTEI01766	2340.99	-0.209228	0.114244	-1.83141	0.0670388	0.177801	3R
ASTEI01767	100.3	-0.279414	0.20123	-1.38853	0.164976	0.337442	3R
ASTEI01768	50.4341	-0.271974	0.324615	-0.837834	0.402124	0.604669	3R
ASTEI01769	665.719	-0.253986	0.136317	-1.8632	0.0624342	0.169298	3R
ASTEI01770	209.583	-2.50375	0.31942	-7.83844	4.56193e-15	2.16403e-13	3R
ASTEI01771	6.94558	1.28093	0.750264	1.70731	0.0877651	0.216378	3R
ASTEI01772	760.661	0.0114282	0.16203	0.0705313	0.943771	0.970321	3R
ASTEI01773	1044.82	-0.157302	0.118642	-1.32586	0.184886	0.364441	3R
ASTEI01774	563.754	-0.581496	0.142852	-4.07061	4.68902e-05	0.000411911	3R
ASTEI01775	96.3853	-0.661429	0.260574	-2.53836	0.0111374	0.0430028	3R
ASTEI01776	3943.18	-0.482561	0.106876	-4.51516	6.32686e-06	7.00961e-05	3R
ASTEI01777	23.5137	-0.424472	0.724195	-0.58613	0.557788	0.731342	3R
ASTEI01778	321.396	0.256711	0.280081	0.916562	0.359372	0.564714	3R
ASTEI01779	61.7441	-0.107264	0.438466	-0.244635	0.806739	0.891207	3R
ASTEI01780	10.1965	-0.0899983	0.6102	-0.14749	0.882745	0.935638	3R
ASTEI01781	1248.15	0.199301	0.133253	1.49566	0.134743	0.293584	3R
ASTEI01782	3096.77	-0.236333	0.1086	-2.17618	0.0295421	0.0942765	3R
ASTEI01783	241.976	0.636819	0.186937	3.4066	0.000657774	0.00409551	3R
ASTEI01784	134.667	-0.519093	0.204243	-2.54154	0.0110365	0.0427127	3R
ASTEI01785	69.353	0.247281	0.254098	0.973172	0.330468	0.534549	3R
ASTEI01786	125.125	-0.203597	0.254647	-0.799528	0.423984	0.62425	3R
ASTEI01787	174.748	-0.3033	0.2544	-1.19222	0.233176	0.425761	3R
ASTEI01788	627.797	0.120525	0.167174	0.720957	0.470936	0.665032	3R
ASTEI01789	597.86	0.0431929	0.121904	0.354319	0.7231	0.844772	3R
ASTEI01790	337.674	-0.325416	0.22598	-1.44002	0.149862	0.316845	3R
ASTEI01791	105.654	-0.259446	0.231261	-1.12188	0.261915	0.460302	3R
ASTEI01792	16.0651	-0.0385423	0.477589	-0.0807018	0.935679	0.965963	3R
ASTEI01793	124.272	-0.202516	0.242211	-0.836113	0.403091	0.605489	3R
ASTEI01794	373.586	-0.498855	0.128803	-3.87301	0.0001075	0.000858082	3R
ASTEI01795	515.729	0.0687005	0.122625	0.560249	0.57531	0.745146	3R
ASTEI01796	586.695	-0.182307	0.162765	-1.12006	0.262689	0.460617	3R
ASTEI01797	13.0217	-1.21297	0.842739	-1.43931	0.150062	0.317001	3R
ASTEI01798	593.1	0.330859	0.120632	2.74272	0.00609321	0.0261794	3R
ASTEI017980	19.0094	1.19586	0.656526	1.8215	0.0685308	0.180686	3R
ASTEI017981	1.26901	-0.520659	1.6026	-0.324885	0.745268	0.857403	3R
ASTEI01799	78.9865	-0.98066	0.31013	-3.16209	0.0015664	0.00856691	3R
ASTEI01800	256.985	0.165529	0.142539	1.16129	0.245526	0.440627	3R
ASTEI01802	1.94593	1.88638	1.42588	1.32296	0.18585	0.365844	3R
ASTEI01803	893.856	0.0769958	0.138976	0.554024	0.579563	0.747744	3R
ASTEI01804	426.668	-0.262916	0.158956	-1.65401	0.0981245	0.233737	3R
ASTEI01805	94.3833	-1.2598	0.434635	-2.89853	0.00374911	0.0176191	3R
ASTEI01806	479.447	-0.00458725	0.122653	-0.0374003	0.970166	0.984052	3R
ASTEI01807	7.05625	1.8421	0.829352	2.22113	0.0263418	0.0860683	3R
ASTEI01808	67.9629	-0.864976	0.256716	-3.36939	0.000753355	0.00462031	3R
ASTEI01809	968.622	0.155484	0.108643	1.43115	0.152387	0.320551	3R
ASTEI01810	451.034	0.422149	0.116046	3.63778	0.000275001	0.00195837	3R
ASTEI01811	491.756	0.0739936	0.113805	0.650176	0.515579	0.69947	3R
ASTEI01812	368.487	-0.0889815	0.129899	-0.685006	0.49334	0.68242	3R
ASTEI01814	79.52	-0.979148	0.871583	-1.12341	0.261262	0.45971	3R
ASTEI01815	565.043	0.174702	0.118317	1.47656	0.139795	0.301403	3R
ASTEI01816	867.977	-0.216434	0.142624	-1.51751	0.129137	0.285112	3R
ASTEI01818	185.963	-1.05264	0.179455	-5.86573	4.47163e-09	9.54597e-08	3R
ASTEI01819	186.353	-1.34768	0.180227	-7.47768	7.56479e-14	3.17393e-12	3R
ASTEI01820	688.344	0.188585	0.145818	1.29329	0.195911	0.378911	3R
ASTEI01821	4067.85	0.222407	0.0954953	2.32899	0.0198597	0.0687548	3R
ASTEI01822	144.456	-0.280464	0.178444	-1.57172	0.116015	0.264016	3R
ASTEI01823	1171.67	0.0270004	0.14313	0.188643	0.850373	0.917383	3R
ASTEI01824	42.9056	1.22591	0.327461	3.74369	0.000181339	0.00135794	3R
ASTEI01825	30.9353	-1.00552	1.3039	-0.771164	0.44061	0.640096	3R
ASTEI01826	556.012	0.70443	0.177102	3.97754	6.96311e-05	0.000585143	3R
ASTEI01827	256.235	-0.342839	0.15566	-2.2025	0.0276303	0.0893489	3R
ASTEI01828	393.533	-0.304395	0.158335	-1.92247	0.0545461	0.152388	3R
ASTEI01829	2039.86	-0.0484603	0.100895	-0.480304	0.631012	0.786362	3R
ASTEI01830	210.406	-0.177963	0.268118	-0.66375	0.50685	0.692477	3R
ASTEI01831	252.58	-0.101395	0.138976	-0.729584	0.465644	0.660617	3R
ASTEI01832	35.3305	-0.536119	0.400014	-1.34025	0.180163	0.358231	3R
ASTEI01833	4.05943	1.33446	0.956794	1.39472	0.1631	0.335116	3R
ASTEI01834	468.467	-0.507119	0.178147	-2.84663	0.00441843	0.0201772	3R
ASTEI01835	204.106	-1.25573	0.623601	-2.01367	0.0440444	0.129689	3R
ASTEI01836	203.953	-0.118558	0.16898	-0.701607	0.482924	0.674585	3R
ASTEI01837	974.478	-0.0747811	0.127642	-0.585866	0.557966	0.731492	3R
ASTEI01838	316.493	0.119903	0.14939	0.802615	0.422197	0.622371	3R
ASTEI01839	67.2274	-0.447945	0.292371	-1.53211	0.125494	0.279459	3R
ASTEI01840	482.648	-0.190345	0.186028	-1.0232	0.306211	0.508762	3R
ASTEI01841	2065.2	-1.09102	0.0992717	-10.9902	4.2586e-28	5.96307e-26	3R
ASTEI01842	194.762	-0.487476	0.19129	-2.54836	0.0108231	0.0419846	3R
ASTEI01843	163.477	-0.392476	0.192296	-2.04099	0.0412515	0.122992	3R
ASTEI01844	19.7911	-0.462166	0.511576	-0.903416	0.366305	0.570971	3R
ASTEI01845	141.89	-1.55945	0.25972	-6.00434	1.92112e-09	4.36934e-08	3R
ASTEI01846	240.253	0.171034	0.176735	0.967742	0.333173	0.537031	3R
ASTEI01847	895.694	-0.0902885	0.136905	-0.659499	0.509576	0.694371	3R
ASTEI01848	332.181	-0.566663	0.162404	-3.48921	0.000484442	0.00318269	3R
ASTEI01849	404.734	0.583818	0.140019	4.16957	3.05174e-05	0.000285107	3R
ASTEI01850	16.385	0.293203	0.46604	0.629137	0.529259	0.711022	3R
ASTEI01851	15.1301	-0.266903	0.501065	-0.532671	0.594261	0.760293	3R
ASTEI01852	413.069	0.588535	0.156941	3.75005	0.0001768	0.00132651	3R
ASTEI01853	353.293	1.05932	0.207957	5.09395	3.50672e-07	5.21833e-06	3R
ASTEI01854	370.78	-0.0221878	0.16214	-0.136843	0.891155	0.940441	3R
ASTEI01855	293.034	-0.165806	0.152415	-1.08786	0.276657	0.475851	3R
ASTEI01856	540.324	-0.368552	0.20808	-1.77121	0.0765265	0.195514	3R
ASTEI01857	278.133	0.408107	0.193949	2.1042	0.0353613	0.109247	3R
ASTEI01858	1.26112	-1.29631	1.75546	-0.738442	0.460246	0.65665	3R
ASTEI01859	320.98	1.05728	0.21457	4.92742	8.33227e-07	1.15009e-05	3R
ASTEI018590	1168.53	1.66862	0.509035	3.27801	0.00104542	0.00613009	3R
ASTEI018591	176.391	0.00761874	0.165585	0.0460112	0.963301	0.98034	3R
ASTEI01860	426.255	0.509617	0.169322	3.00974	0.0026147	0.0131152	3R
ASTEI01861	21.5013	0.51037	0.422276	1.20862	0.22681	0.41881	3R
ASTEI01862	1059.26	-0.0802039	0.1241	-0.646283	0.518096	0.701721	3R
ASTEI01863	91.7394	-0.355584	0.319888	-1.11159	0.266315	0.464173	3R
ASTEI01864	336.192	-2.64655	0.185306	-14.2821	2.82943e-46	1.26476e-43	3R
ASTEI01865	1.76788	-0.0953922	1.46548	-0.0650926	0.9481	0.972192	3R
ASTEI01866	117.395	-0.515566	0.197273	-2.61346	0.00896302	0.036007	3R
ASTEI01867	959.929	-0.143049	0.140613	-1.01732	0.308999	0.51091	3R
ASTEI01869	598.113	0.117958	0.19125	0.616774	0.537384	0.717376	3R
ASTEI01871	81.2691	1.40767	0.265106	5.30984	1.09722e-07	1.81909e-06	3R
ASTEI01872	200.964	-0.277921	0.159633	-1.741	0.0816831	0.205259	3R
ASTEI01873	422.877	0.0477406	0.153597	0.310817	0.75594	0.864205	3R
ASTEI01874	1421.19	-0.187875	0.145599	-1.29036	0.196927	0.380117	3R
ASTEI01875	415.934	0.0544685	0.177182	0.307415	0.758527	0.865354	3R
ASTEI01876	38.9955	-0.491343	0.325035	-1.51166	0.130619	0.287457	3R
ASTEI01877	224.554	-0.250072	0.200569	-1.24681	0.212467	0.40099	3R
ASTEI01878	297.611	-0.0531504	0.158197	-0.335975	0.73689	0.85139	3R
ASTEI01879	166.647	0.0477821	0.187399	0.254975	0.798742	0.887181	3R
ASTEI01880	68.2785	-0.74458	0.252677	-2.94676	0.00321124	0.0154667	3R
ASTEI01881	252.421	0.250035	0.138744	1.80214	0.0715241	0.186505	3R
ASTEI01882	220.889	0.0652721	0.148835	0.438555	0.660984	0.805525	3R
ASTEI01883	519.25	0.00210646	0.202369	0.010409	0.991695	0.995636	3R
ASTEI01884	854.694	-0.357831	0.179022	-1.99881	0.0456285	0.133408	3R
ASTEI01885	191.223	-1.2952	0.687626	-1.88358	0.0596223	0.163234	3R
ASTEI01886	1001.51	-0.120816	0.600737	-0.201112	0.840611	0.911613	3R
ASTEI01887	1117.44	-1.83372	0.146292	-12.5346	4.82816e-36	1.19389e-33	3R
ASTEI01888	773.42	-0.0794609	0.177372	-0.447991	0.654159	0.802034	3R
ASTEI01889	1837.06	2.52045	0.185448	13.5912	4.5181e-42	1.59119e-39	3R
ASTEI01890	5.61574	-0.945572	0.911099	-1.03784	0.299346	0.500825	3R
ASTEI01891	22.9298	0.84606	0.789675	1.0714	0.283988	0.484372	3R
ASTEI01892	2.99007	-2.80455	1.43149	-1.95919	0.0500909	0.143113	3R
ASTEI01893	4.68915	-4.46063	1.64124	-2.71784	0.00657094	0.0279767	3R
ASTEI01894	889.672	4.78977	0.206306	23.2168	3.08072e-119	1.7902e-115	3R
ASTEI01895	245.043	-0.318561	0.190463	-1.67257	0.0944127	0.227318	3R
ASTEI01896	403.261	-0.168076	0.216276	-0.777138	0.437077	0.636795	3R
ASTEI01897	640.776	-0.274649	0.132819	-2.06784	0.0386547	0.116808	3R
ASTEI01898	1326.98	0.163657	0.107357	1.52442	0.127404	0.282589	3R
ASTEI01899	669.636	-0.26292	0.124868	-2.10559	0.0352402	0.108973	3R
ASTEI01900	105.334	-0.590251	0.248851	-2.37191	0.0176964	0.0625288	3R
ASTEI01901	8.83839	-0.724107	0.770461	-0.939837	0.347301	0.5524	3R
ASTEI01902	109.845	-1.38286	0.371844	-3.71892	0.000200079	0.00147921	3R
ASTEI01903	83.7253	0.122689	0.224598	0.546261	0.584886	0.752369	3R
ASTEI01904	1464.59	-0.226264	0.103772	-2.1804	0.0292282	0.0935269	3R
ASTEI01905	53.7766	0.370043	0.331545	1.11612	0.264371	0.462242	3R
ASTEI01906	1629.08	-1.11267	0.129918	-8.56433	1.08702e-17	6.68431e-16	3R
ASTEI01907	1914.6	0.0522266	0.120123	0.434776	0.663725	0.80699	3R
ASTEI01908	948.522	-0.568824	0.269474	-2.11087	0.0347836	0.107859	3R
ASTEI01909	381.178	0.148278	0.124085	1.19497	0.232099	0.424462	3R
ASTEI01910	347.564	-0.0754143	0.133364	-0.565479	0.571748	0.74269	3R
ASTEI01911	268.858	0.0652935	0.172872	0.377698	0.705655	0.834804	3R
ASTEI01912	60.5918	0.374543	0.28325	1.3223	0.186067	0.366118	3R
ASTEI01913	0.817855	1.46813	2.17752	0.674224	0.500169	0.687166	3R
ASTEI01914	0.253859	-1.34923	3.81234	-0.353912	0.723405	NA	3R
ASTEI01915	103.247	-0.123083	0.233124	-0.527973	0.597518	0.762613	3R
ASTEI01916	308.432	-0.112873	0.178991	-0.63061	0.528296	0.710006	3R
ASTEI01917	291.132	0.0552301	0.145653	0.37919	0.704546	0.834137	3R
ASTEI01918	708.049	-0.0852436	0.110385	-0.772238	0.439973	0.639491	3R
ASTEI01919	52.0098	-3.07503	1.86732	-1.64676	0.0996073	0.236542	3R
ASTEI01920	702.516	0.104433	0.143901	0.725728	0.468006	0.662747	3R
ASTEI01921	584.76	-0.167374	0.143568	-1.16582	0.243689	0.438075	3R
ASTEI01922	237.015	-0.136779	0.169036	-0.809171	0.418417	0.618446	3R
ASTEI01923	246.054	0.323347	0.145351	2.2246	0.0261079	0.0853795	3R
ASTEI01924	1327.69	-0.339104	0.152066	-2.22998	0.0257488	0.0845738	3R
ASTEI01925	280.926	1.82462	0.1534	11.8945	1.26361e-32	2.44761e-30	3R
ASTEI01926	367.738	-0.13412	0.161952	-0.828144	0.407589	0.609653	3R
ASTEI01927	123.119	-1.50207	0.351148	-4.27759	1.88924e-05	0.000185759	3R
ASTEI01928	353.033	-1.25848	0.194605	-6.46683	1.00079e-10	2.7425e-09	3R
ASTEI01929	92.2317	-0.221955	0.221556	-1.0018	0.31644	0.518641	3R
ASTEI01930	44.312	-0.366079	0.326675	-1.12062	0.262449	0.460617	3R
ASTEI01931	223.154	0.500853	0.272669	1.83685	0.0662319	0.176579	3R
ASTEI01932	123.65	0.0757447	0.271182	0.279313	0.780004	0.876679	3R
ASTEI01933	869.344	-0.28714	0.153857	-1.86628	0.0620027	0.168377	3R
ASTEI01934	153.922	-0.258813	0.182121	-1.42111	0.155286	0.32465	3R
ASTEI01935	303.369	-0.285474	0.143796	-1.98527	0.0471142	0.136345	3R
ASTEI01936	178.729	-0.666122	0.225246	-2.9573	0.00310342	0.0150471	3R
ASTEI01937	30.3087	-0.187552	0.385384	-0.486663	0.626497	0.783762	3R
ASTEI01938	231.919	-3.60145	0.223081	-16.1441	1.24952e-58	1.11707e-55	3R
ASTEI01939	465.755	-0.0494244	0.137959	-0.358255	0.720153	0.843537	3R
ASTEI01940	943.769	-0.0160822	0.108329	-0.148457	0.881982	0.935085	3R
ASTEI01941	1082.84	0.520701	0.112769	4.61743	3.88528e-06	4.54273e-05	3R
ASTEI01942	80.3832	-0.264326	0.25421	-1.0398	0.298435	0.499915	3R
ASTEI01943	54.0769	-0.54056	0.355924	-1.51875	0.128825	0.284748	3R
ASTEI01944	1181.33	0.498191	0.123852	4.02248	5.7588e-05	0.000493939	3R
ASTEI01945	1191.56	0.172527	0.128682	1.34072	0.180012	0.358114	3R
ASTEI01946	362.988	0.600317	0.173585	3.45835	0.000543494	0.0034975	3R
ASTEI01947	407.724	-1.18736	0.178509	-6.65158	2.89958e-11	8.64076e-10	3R
ASTEI01948	1597.85	-0.0161434	0.118276	-0.136488	0.891435	0.940474	3R
ASTEI01949	1.11117	0.561244	1.98348	0.282959	0.777208	0.875807	3R
ASTEI01950	0.441854	1.21462	2.89427	0.419663	0.674732	NA	3R
ASTEI01951	254.076	-0.359748	0.238903	-1.50583	0.13211	0.289859	3R
ASTEI01952	1728.67	0.363298	0.182028	1.99583	0.0459522	0.134132	3R
ASTEI01953	5890.94	0.117576	0.129921	0.904983	0.365475	0.570064	3R
ASTEI01954	25.6364	0.349699	0.403476	0.866716	0.386098	0.590011	3R
ASTEI01955	300.242	0.448489	0.144126	3.11179	0.00185959	0.00989171	3R
ASTEI01956	414.603	-0.389533	0.140235	-2.77771	0.00547427	0.0240174	3R
ASTEI01957	137.289	-0.273963	0.199421	-1.37379	0.169507	0.343626	3R
ASTEI01958	1047.66	0.519002	0.174554	2.9733	0.0029462	0.0144122	3R
ASTEI01959	383.877	-0.216209	0.138654	-1.55934	0.118915	0.269192	3R
ASTEI01960	278.88	-0.631538	0.170125	-3.7122	0.000205469	0.00151137	3R
ASTEI01961	211.339	-0.593933	0.182537	-3.25378	0.00113882	0.00656516	3R
ASTEI01963	679.232	0.279565	0.107012	2.61246	0.00898934	0.0361003	3R
ASTEI01964	16.8941	1.14389	0.507479	2.25407	0.0241915	0.0804969	3R
ASTEI01965	34.935	0.207184	0.3587	0.577597	0.563536	0.735807	3R
ASTEI01966	20.9416	0.27593	0.475792	0.579938	0.561956	0.734569	3R
ASTEI01967	382.459	0.20079	0.164783	1.21851	0.223028	0.41446	3R
ASTEI01968	545.482	0.650252	0.174042	3.73618	0.000186834	0.00139191	3R
ASTEI01969	1239.06	0.631219	0.109541	5.76238	8.29342e-09	1.6792e-07	3R
ASTEI01970	1744.21	0.209377	0.0950136	2.20365	0.0275487	0.0891594	3R
ASTEI01971	179.886	0.258062	0.167875	1.53722	0.124238	0.277513	3R
ASTEI01972	1719.81	-0.170998	0.10957	-1.56063	0.11861	0.268658	3R
ASTEI01973	174.405	-0.762643	0.187641	-4.06437	4.81615e-05	0.000420536	3R
ASTEI01974	12.1786	-1.1042	0.599481	-1.84193	0.0654853	0.1752	3R
ASTEI01975	982.869	-0.348038	0.14658	-2.37439	0.0175781	0.0622087	3R
ASTEI01976	151.467	0.334942	0.166762	2.00851	0.0445894	0.130863	3R
ASTEI01977	468.956	-0.426686	0.120755	-3.53348	0.00041013	0.00274728	3R
ASTEI01978	2.28428	1.60751	1.20107	1.3384	0.180767	0.35894	3R
ASTEI01979	47.2788	0.862313	0.320348	2.6918	0.00710668	0.0298496	3R
ASTEI01980	29.7386	0.21466	0.383713	0.559428	0.57587	0.745379	3R
ASTEI01981	38.6305	1.48783	0.339857	4.3778	1.19881e-05	0.000124176	3R
ASTEI01982	8.91793	0.626342	0.624328	1.00323	0.315752	0.518132	3R
ASTEI01983	77.4219	-0.602587	0.234809	-2.56629	0.0102794	0.0403198	3R
ASTEI01984	67.687	0.0485807	0.304105	0.15975	0.873078	0.92963	3R
ASTEI01985	90.3584	-0.553593	0.233664	-2.36918	0.0178274	0.062861	3R
ASTEI01986	330.754	-0.695693	0.151777	-4.58366	4.5691e-06	5.2733e-05	3R
ASTEI01987	416.082	0.00307469	0.140685	0.0218552	0.982563	0.991263	3R
ASTEI01988	331.478	0.121188	0.132952	0.911519	0.362022	0.566732	3R
ASTEI01989	1724.27	0.311388	0.149817	2.07846	0.037667	0.114869	3R
ASTEI01990	166.971	-0.195418	0.206925	-0.94439	0.34497	0.550156	3R
ASTEI01991	145.703	-0.834226	0.276668	-3.01525	0.00256763	0.0129014	3R
ASTEI01992	3.11476	0.217748	1.01627	0.214262	0.830343	0.905087	3R
ASTEI01993	0.425371	-1.99204	3.3618	-0.59255	0.553482	NA	3R
ASTEI01994	0.454002	-2.07144	3.29749	-0.628188	0.529881	NA	3R
ASTEI01995	7.22095	-0.555818	0.695869	-0.798739	0.424442	0.624558	3R
ASTEI01996	276.744	0.196072	0.208148	0.941981	0.346202	0.551324	3R
ASTEI01997	4.95359	0.0733339	0.851222	0.0861513	0.931346	0.963886	3R
ASTEI01998	192.03	-0.141448	0.177647	-0.796231	0.425898	0.625583	3R
ASTEI01999	15.6104	-0.871173	0.678537	-1.2839	0.199177	0.382807	3R
ASTEI02000	30.0827	-0.215042	0.417897	-0.514582	0.606845	0.768525	3R
ASTEI02001	4.65233	-1.16619	0.929739	-1.25432	0.209724	0.396973	3R
ASTEI02002	1.58599	1.28494	1.40518	0.914432	0.36049	0.565552	3R
ASTEI02003	11.572	1.08992	0.548832	1.98589	0.0470455	0.136248	3R
ASTEI02004	134.837	-0.317849	0.234689	-1.35434	0.175628	0.35253	3R
ASTEI02005	473.035	0.829022	0.154688	5.35931	8.35417e-08	1.41534e-06	3R
ASTEI02006	8.82247	-1.78963	0.72078	-2.4829	0.0130317	0.0489135	3R
ASTEI02007	93.6886	-0.721362	0.261584	-2.75767	0.0058215	0.0252077	3R
ASTEI02008	732.788	-1.3362	0.24072	-5.55085	2.84289e-08	5.19498e-07	3R
ASTEI02009	84.1423	0.246023	0.260681	0.94377	0.345287	0.550231	3R
ASTEI02010	89.9652	0.208428	0.305245	0.682821	0.49472	0.683829	3R
ASTEI02011	64.2491	-0.317675	0.307388	-1.03347	0.301385	0.503333	3R
ASTEI02012	668.002	0.132577	0.128213	1.03404	0.301117	0.503103	3R
ASTEI02013	1774.56	0.405253	0.134472	3.01366	0.00258116	0.0129638	3R
ASTEI02014	815.836	-0.241392	0.127197	-1.89778	0.0577256	0.159204	3R
[truncated: 9,878 more rows]

## Sheet: 2_nGuy1_1-TF vs WF
Gene	baseMean	log2FoldChange	lfcSE	stat	pvalue	padj	Chromsome
ASTEI00001	129.129	0.526764	0.269193	1.95682	0.0503682	0.144229	2R
ASTEI00002	871.848	0.261062	0.225111	1.1597	0.24617	0.369128	2R
ASTEI000020	298.369	0.042308	0.196967	0.214797	0.829926	0.881411	2R
ASTEI00003	256.557	-0.367256	0.235508	-1.55942	0.118896	0.231681	2R
ASTEI00004	28.5931	-0.944946	0.581086	-1.62617	0.103913	0.213122	2R
ASTEI00005	439.324	-0.53878	0.216338	-2.49046	0.0127579	0.074181	2R
ASTEI00006	145.924	-0.340734	0.221429	-1.53879	0.123854	0.237012	2R
ASTEI00008	319.742	-0.427442	0.156006	-2.73991	0.00614564	0.0516466	2R
ASTEI00009	108.897	-0.262601	0.191949	-1.36808	0.171288	0.290065	2R
ASTEI00010	20.6205	-1.53109	0.588516	-2.60161	0.00927881	0.0635181	2R
ASTEI00012	18.8617	1.26386	0.529714	2.38593	0.0170359	0.0848643	2R
ASTEI00013	609.185	-0.512305	0.212029	-2.41621	0.0156831	0.0815288	2R
ASTEI00014	227.625	-0.269774	0.188435	-1.43166	0.152242	0.268864	2R
ASTEI00015	108.878	1.0259	0.435191	2.35736	0.0184056	0.0880525	2R
ASTEI00016	632.408	-0.0793551	0.165	-0.48094	0.630559	0.724453	2R
ASTEI00017	35.044	-0.745264	0.379477	-1.96392	0.0495389	0.143075	2R
ASTEI00018	223.316	-0.450884	0.20853	-2.1622	0.0306027	0.11205	2R
ASTEI00019	409.451	0.259825	0.156492	1.66031	0.0968529	0.204613	2R
ASTEI00020	131.054	0.154961	0.220365	0.703201	0.48193	0.592734	2R
ASTEI00021	108.181	-0.629478	0.315169	-1.99727	0.0457958	0.137219	2R
ASTEI00022	82.2352	-0.292949	0.256083	-1.14396	0.25264	0.375616	2R
ASTEI00023	182.114	-0.22422	0.15983	-1.40287	0.160656	0.279044	2R
ASTEI00024	30.2934	0.754519	0.486749	1.55012	0.121113	0.234089	2R
ASTEI00025	139.667	1.12012	0.605503	1.84989	0.0643289	0.162763	2R
ASTEI00026	0.175297	-0.111386	4.40736	-0.0252727	0.979837	NA	2R
ASTEI00027	0.991605	0.314823	1.53139	0.20558	0.837119	NA	2R
ASTEI00028	2.31288	-0.673144	1.04323	-0.645248	0.518767	NA	2R
ASTEI00029	5.46269	0.761608	0.716911	1.06235	0.288078	0.410281	2R
ASTEI00030	445.75	-0.513266	0.273804	-1.87457	0.0608515	0.158557	2R
ASTEI00031	522.336	-0.179589	0.154342	-1.16358	0.244594	0.36774	2R
ASTEI00032	112.35	-0.469341	0.314058	-1.49444	0.135061	0.249564	2R
ASTEI00033	554.117	0.301189	0.212618	1.41657	0.156608	0.274059	2R
ASTEI00034	300.334	-0.374376	0.174214	-2.14895	0.0316387	0.11405	2R
ASTEI00035	323.422	0.0787041	0.14306	0.550146	0.582219	0.681668	2R
ASTEI00036	559.712	0.784347	0.324541	2.41679	0.0156582	0.0814624	2R
ASTEI00037	198.141	-0.428506	0.217083	-1.97393	0.0483895	0.141464	2R
ASTEI00038	401.927	1.37915	0.690814	1.99641	0.0458888	0.137326	2R
ASTEI00039	271.689	0.796498	0.468433	1.70034	0.0890662	0.195178	2R
ASTEI00040	141.43	0.868548	0.437156	1.98681	0.0469431	0.139291	2R
ASTEI00041	162.073	-0.340225	0.183475	-1.85434	0.063691	0.162194	2R
ASTEI00042	695.927	0.988458	0.472641	2.09135	0.0364966	0.122289	2R
ASTEI00043	1.81405	1.32553	1.11256	1.19143	0.233486	NA	2R
ASTEI00044	9.26864	-0.618074	0.612153	-1.00967	0.312653	0.435202	2R
ASTEI00045	280.228	1.06673	0.456894	2.33474	0.0195572	0.0906311	2R
ASTEI00046	1032.71	-0.0228758	0.127337	-0.179648	0.857429	0.900157	2R
ASTEI00047	483.862	-0.362665	0.195982	-1.8505	0.0642409	0.16267	2R
ASTEI00048	911.611	-0.131602	0.121796	-1.08051	0.279914	0.40249	2R
ASTEI00049	505.064	-0.363737	0.175719	-2.07	0.0384528	0.124637	2R
ASTEI00050	140.947	0.165901	0.208056	0.797387	0.425226	0.5423	2R
ASTEI00052	95.7979	1.25748	0.837652	1.50119	0.133306	0.247768	2R
ASTEI00053	66.1747	1.16219	0.55018	2.11239	0.034653	0.119259	2R
ASTEI00054	440.407	-0.743049	0.244779	-3.0356	0.0024006	0.0315504	2R
ASTEI00055	861.06	-0.47575	0.133062	-3.57539	0.000349707	0.00992506	2R
ASTEI00056	292.648	1.01239	0.49262	2.05511	0.0398687	0.127214	2R
ASTEI00057	489.252	-0.438844	0.206785	-2.12222	0.033819	0.118063	2R
ASTEI00058	473.705	0.1849	0.145237	1.27309	0.202987	0.323482	2R
ASTEI00059	1221.3	-0.00209449	0.302596	-0.00692175	0.994477	0.995778	2R
ASTEI00060	2958.35	-0.291106	0.170223	-1.71014	0.0872397	0.192905	2R
ASTEI00061	76.3092	-0.136603	0.25181	-0.542482	0.587487	0.685771	2R
ASTEI00062	96.5457	-0.613133	0.284881	-2.15224	0.0313783	0.113622	2R
ASTEI00063	41.3629	-0.401428	0.278232	-1.44278	0.149082	0.265205	2R
ASTEI00064	33.4168	1.09473	0.603521	1.8139	0.0696931	0.170634	2R
ASTEI00065	16.9797	2.49762	0.858906	2.90791	0.00363852	0.0394304	2R
ASTEI00066	303.659	1.25014	0.65194	1.91757	0.055166	0.150467	2R
ASTEI00067	201.049	-0.866845	0.250751	-3.457	0.000546228	0.0131633	2R
ASTEI00068	216.004	0.601482	0.443462	1.35633	0.174993	0.293913	2R
ASTEI00069	1.06771	-2.91784	1.77423	-1.64457	0.100058	NA	2R
ASTEI00070	1.245	-1.07315	2.35066	-0.456532	0.648008	NA	2R
ASTEI00071	2.52579	1.62117	1.17801	1.37619	0.168762	NA	2R
ASTEI00072	296.212	0.501349	0.210992	2.37615	0.0174943	0.0859654	2R
ASTEI00073	1.37261	0.666871	1.46639	0.45477	0.649275	NA	2R
ASTEI00074	347.996	0.303875	0.14049	2.16297	0.0305435	0.111968	2R
ASTEI00075	332.934	-0.177255	0.152347	-1.1635	0.244627	0.36774	2R
ASTEI00076	5.52076	-2.34124	0.906826	-2.5818	0.00982879	0.06522	2R
ASTEI00077	13.1695	-0.132218	0.475793	-0.277889	0.781097	0.845511	2R
ASTEI00078	50.5675	0.16113	0.295294	0.545659	0.585301	0.684284	2R
ASTEI00079	388.289	0.314928	0.127472	2.47057	0.0134897	0.0761827	2R
ASTEI00080	206.067	0.129309	0.196282	0.658793	0.510029	0.618311	2R
ASTEI00081	25.3917	0.102349	0.411991	0.248426	0.803805	0.86227	2R
ASTEI00082	44.2415	-0.59298	0.389312	-1.52315	0.127721	0.241274	2R
ASTEI00083	169.898	-0.400875	0.249426	-1.60719	0.108013	0.218573	2R
ASTEI00084	46.3292	-0.289211	0.279347	-1.03531	0.300524	0.423371	2R
ASTEI00085	234.117	-0.917466	0.268826	-3.41286	0.000642839	0.0145371	2R
ASTEI00086	969.052	-0.433087	0.204796	-2.11473	0.0344529	0.118969	2R
ASTEI00087	668.318	-0.338026	0.215382	-1.56942	0.116549	0.228849	2R
ASTEI00088	936.665	-0.334211	0.18701	-1.78713	0.0739164	0.176088	2R
ASTEI00089	1094.28	-0.379688	0.169661	-2.23793	0.0252259	0.102514	2R
ASTEI00090	1152.89	-0.263114	0.169413	-1.55309	0.120401	0.233056	2R
ASTEI00091	167.32	-0.528075	0.155639	-3.39296	0.000691424	0.0152856	2R
ASTEI00092	479.386	1.33067	0.696836	1.90959	0.0561854	0.152062	2R
ASTEI00093	156.831	0.607729	0.240217	2.52992	0.0114089	0.0703072	2R
ASTEI00094	159.584	-0.35338	0.258501	-1.36704	0.171614	0.29043	2R
ASTEI00095	68.0265	0.923301	0.568424	1.62432	0.104308	0.213432	2R
ASTEI00096	53.7601	1.69189	0.530961	3.18647	0.00144019	0.0227078	2R
ASTEI00097	54.3705	-0.557599	0.278172	-2.00451	0.0450156	0.135991	2R
ASTEI00098	90.9434	0.25719	0.288665	0.890962	0.37295	0.492374	2R
ASTEI00099	982.313	1.44135	0.616876	2.33653	0.0194636	0.0903956	2R
ASTEI00100	277.972	0.95842	0.419152	2.28657	0.022221	0.0966065	2R
ASTEI00101	0.169555	1.76309	4.36651	0.403775	0.686379	NA	2R
ASTEI00102	2.44854	3.25095	1.41461	2.29812	0.0215549	NA	2R
ASTEI00103	185.358	0.526729	0.505542	1.04191	0.297453	0.420285	2R
ASTEI00104	174.072	0.582986	0.225401	2.58644	0.00969739	0.0647788	2R
ASTEI00105	27.0746	2.27515	0.698307	3.25809	0.00112166	0.0199983	2R
ASTEI00107	426.789	1.52415	0.817739	1.86386	0.0623413	0.160443	2R
ASTEI00108	1.58271	0.359009	1.21026	0.296637	0.766743	NA	2R
ASTEI00109	134.457	-0.389951	0.348571	-1.11871	0.263263	0.386269	2R
ASTEI00110	233.133	-0.570885	0.272422	-2.09559	0.0361183	0.121619	2R
ASTEI00111	128.927	-0.402552	0.257069	-1.56593	0.117365	0.22972	2R
ASTEI00112	136.966	0.953961	0.612935	1.55638	0.119617	0.232237	2R
ASTEI00113	994.934	0.0534857	0.164548	0.325047	0.745146	0.816953	2R
ASTEI00114	311.129	0.0431534	0.199501	0.216306	0.828749	0.880701	2R
ASTEI00115	83.4632	-0.399483	0.350765	-1.13889	0.254749	0.377896	2R
ASTEI00116	8.45896	-0.159157	0.697467	-0.228192	0.819497	0.873659	2R
ASTEI00117	251.975	0.779148	0.340252	2.28991	0.0220264	0.0962945	2R
ASTEI00118	147.956	-0.417536	0.221161	-1.88793	0.0590353	0.155957	2R
ASTEI00119	35.9972	-0.605955	0.353634	-1.71351	0.0866187	0.19226	2R
ASTEI00120	698.735	0.0191087	0.132292	0.144444	0.88515	0.921023	2R
ASTEI00121	4187.29	-0.163419	0.108785	-1.50222	0.133041	0.247575	2R
ASTEI00122	289.575	0.429193	0.166088	2.58413	0.0097625	0.0650399	2R
ASTEI00123	480.158	0.0664249	0.2731	0.243225	0.807831	0.865086	2R
ASTEI00124	66.4338	-0.446374	0.327146	-1.36445	0.172426	0.291054	2R
ASTEI00125	842.358	0.00285277	0.118389	0.0240966	0.980776	0.986695	2R
ASTEI00126	72.4654	-0.154652	0.28809	-0.536818	0.591393	0.689258	2R
ASTEI00127	437.568	0.328484	0.158542	2.07191	0.038274	0.124343	2R
ASTEI00128	1823.51	-0.239918	0.170499	-1.40715	0.159383	0.27739	2R
ASTEI00129	118.501	0.512112	0.374907	1.36597	0.171948	0.290808	2R
ASTEI00130	112.905	0.360445	0.207667	1.73569	0.0826181	0.187462	2R
ASTEI00131	19.2375	0.437057	0.443639	0.985164	0.324543	0.445902	2R
ASTEI00132	687.012	-0.156605	0.140599	-1.11384	0.265346	0.388781	2R
ASTEI00133	0.834163	-3.39171	2.22864	-1.52187	0.128041	NA	2R
ASTEI00135	1.06454	0.523825	1.65375	0.316751	0.751433	NA	2R
ASTEI00136	19.4252	0.506387	0.42443	1.1931	0.232831	0.355622	2R
ASTEI00137	47.299	-0.348572	0.326265	-1.06837	0.285353	0.407796	2R
ASTEI00138	221.298	-0.504247	0.27832	-1.81175	0.0700242	0.170926	2R
ASTEI00139	100.069	-1.07228	0.458837	-2.33695	0.0194416	0.0903956	2R
ASTEI00140	351.121	0.909446	0.375768	2.42023	0.0155105	0.0811944	2R
ASTEI00141	351.152	-0.588678	0.212557	-2.76951	0.00561401	0.0494985	2R
ASTEI00142	205.456	-0.943984	0.386715	-2.44103	0.0146454	0.0792095	2R
ASTEI00143	1235.27	-0.292029	0.165318	-1.76647	0.0773167	0.181188	2R
ASTEI00144	30.316	1.0425	0.598929	1.74061	0.0817512	0.186827	2R
ASTEI00145	11.7511	0.459596	0.823215	0.558293	0.576644	0.677331	2R
ASTEI00146	18.775	1.81857	0.554921	3.27716	0.00104856	0.0193514	2R
ASTEI00147	17.4734	0.708692	0.625877	1.13232	0.257501	0.380946	2R
ASTEI00148	16.6744	1.73083	0.662716	2.61172	0.00900875	0.0627743	2R
ASTEI00149	712.226	-1.18725	0.389794	-3.04584	0.00232028	0.0308421	2R
ASTEI00150	3350.41	0.172666	0.189221	0.91251	0.3615	0.481008	2R
ASTEI00151	142.025	-0.101571	0.184609	-0.550198	0.582184	0.681668	2R
ASTEI00152	285.579	-0.586883	0.240724	-2.43799	0.0147693	0.0793532	2R
ASTEI00153	38.1407	-0.867047	0.350696	-2.47236	0.0134223	0.0760522	2R
ASTEI00154	506.831	-0.307831	0.182311	-1.68849	0.0913166	0.197715	2R
ASTEI00155	96.461	-0.45078	0.258763	-1.74205	0.0814988	0.186549	2R
ASTEI00156	108.669	-0.351704	0.228349	-1.5402	0.123511	0.236717	2R
ASTEI00157	92.7525	1.46577	0.593864	2.4682	0.0135796	0.0764608	2R
ASTEI00158	11.8197	0.309826	0.662356	0.467764	0.639954	0.732043	2R
ASTEI00159	115.205	0.822793	0.402468	2.04437	0.040917	0.128798	2R
ASTEI00160	92.585	-0.427098	0.286358	-1.49148	0.135835	0.250289	2R
ASTEI00161	242.382	-0.679006	0.27558	-2.46392	0.0137428	0.0770083	2R
ASTEI00162	1051.35	0.15787	0.152333	1.03635	0.30004	0.423086	2R
ASTEI00163	41.6246	-0.669064	0.319558	-2.09372	0.0362853	0.121997	2R
ASTEI00164	171.782	0.994861	0.427307	2.32821	0.0199008	0.0915767	2R
ASTEI00165	417.425	0.797218	0.379785	2.09913	0.0358055	0.12126	2R
ASTEI00166	513.383	-0.400911	0.208063	-1.92687	0.0539957	0.149069	2R
ASTEI00167	260.549	0.792815	0.425785	1.86201	0.0626017	0.160847	2R
ASTEI00168	756.295	1.82699	0.411264	4.44237	8.8975e-06	0.000741529	2R
ASTEI00169	123.851	-1.02083	0.27597	-3.69905	0.000216405	0.00697078	2R
ASTEI00170	15.1204	1.29293	0.568403	2.27466	0.0229261	0.0980763	2R
ASTEI00171	2.91243	0.119774	1.00611	0.119046	0.905239	NA	2R
ASTEI00172	91.9163	-0.173227	0.233967	-0.74039	0.459063	0.57272	2R
ASTEI00173	58.5293	1.19961	0.584318	2.053	0.0400723	0.127476	2R
ASTEI00174	0.448169	2.29893	3.81881	0.602001	0.547173	NA	2R
ASTEI00175	422.543	-0.464994	0.25385	-1.83177	0.0669864	0.166777	2R
ASTEI00176	927.431	-0.416462	0.164947	-2.52483	0.0115755	0.0707945	2R
ASTEI00177	89.1726	1.5081	0.559388	2.69597	0.00701831	0.0551169	2R
ASTEI00178	3.56788	-1.15457	1.19869	-0.963196	0.335449	NA	2R
ASTEI00179	113.554	0.0161851	0.208546	0.0776092	0.938139	0.957727	2R
ASTEI00180	180.171	-0.610007	0.281282	-2.16867	0.030108	0.111286	2R
ASTEI00181	892.704	-0.150662	0.140128	-1.07517	0.282297	0.405083	2R
ASTEI00182	173.226	-0.372214	0.32061	-1.16096	0.24566	0.368789	2R
ASTEI00183	280.001	0.537586	0.271646	1.979	0.0478165	0.140724	2R
ASTEI00184	96.2649	-0.501082	0.26972	-1.85779	0.0631994	0.161789	2R
ASTEI00185	2734.21	-0.191719	0.157358	-1.21837	0.223085	0.345263	2R
ASTEI00186	89.8603	-0.560492	0.344025	-1.62922	0.103267	0.212328	2R
ASTEI00187	198.17	-0.737734	0.266029	-2.77313	0.00555202	0.0493636	2R
ASTEI00188	5.54455	-0.664577	0.680952	-0.975952	0.329088	0.450378	2R
ASTEI00189	177.274	0.15077	0.323028	0.46674	0.640686	0.732482	2R
ASTEI00190	2.836	1.72666	1.38851	1.24354	0.213669	NA	2R
ASTEI00191	11.2001	1.38938	0.686664	2.02337	0.0430351	0.132603	2R
ASTEI00192	2.37097	2.22807	1.27354	1.74951	0.0802035	NA	2R
ASTEI00193	292.447	-0.514187	0.241945	-2.12522	0.0335679	0.117734	2R
ASTEI00194	72.0184	0.338103	0.211321	1.59995	0.109609	0.220342	2R
ASTEI00195	29.693	0.64236	0.451066	1.42409	0.154419	0.271462	2R
ASTEI00196	11.2457	0.567054	0.743764	0.76241	0.445815	0.56113	2R
ASTEI00197	3150.81	-0.572433	0.176321	-3.24653	0.00116819	0.0204919	2R
ASTEI00198	41.7892	0.361518	0.271423	1.33194	0.182881	0.30224	2R
ASTEI00199	187.327	-0.629965	0.282305	-2.23151	0.0256476	0.103398	2R
ASTEI00200	407.678	1.37865	0.742895	1.85577	0.0634859	0.162039	2R
ASTEI00201	68.3465	1.48196	0.256046	5.78785	7.12932e-09	2.07958e-06	2R
ASTEI00202	7.55612	-0.158707	0.610852	-0.259813	0.795008	0.855279	2R
ASTEI00203	419.077	-0.646985	0.226939	-2.85092	0.00435924	0.0433899	2R
ASTEI00204	46.1558	1.45376	0.632937	2.29685	0.0216274	0.0954962	2R
ASTEI00205	12.1962	1.04691	0.820598	1.27578	0.202032	0.322666	2R
ASTEI00206	10.4621	1.19705	0.955304	1.25306	0.210185	0.331503	2R
ASTEI00207	1.64365	-2.21904	1.70017	-1.30518	0.19183	NA	2R
ASTEI00208	0.561138	2.3318	2.53095	0.921312	0.356887	NA	2R
ASTEI00209	182.288	-0.0146927	0.223133	-0.0658471	0.9475	0.963852	2R
ASTEI00210	392.604	-0.385623	0.21617	-1.78388	0.0744429	0.176653	2R
ASTEI00211	264.397	-0.722075	0.301834	-2.39229	0.0167436	0.083966	2R
ASTEI00212	2671.12	-0.114896	0.141674	-0.810989	0.417372	0.535471	2R
ASTEI00213	174.875	-0.637689	0.261237	-2.44104	0.0146452	0.0792095	2R
ASTEI00214	1009.25	-0.230684	0.191217	-1.2064	0.227663	0.350575	2R
ASTEI00215	175.078	-0.681221	0.264578	-2.57475	0.0100313	0.0657546	2R
ASTEI00216	169.479	-0.589398	0.287218	-2.05209	0.0401606	0.127528	2R
ASTEI00217	141.629	0.704707	0.576249	1.22292	0.221359	0.343555	2R
ASTEI00218	148.424	0.114166	0.192644	0.592626	0.553431	0.656899	2R
ASTEI002180	75.5142	-0.321793	0.294174	-1.09389	0.274005	0.397037	2R
ASTEI002184	2.18729	-0.653934	1.20831	-0.541199	0.58837	NA	2R
ASTEI00219	240.879	-0.0383651	0.162447	-0.23617	0.813301	0.869259	2R
ASTEI00220	132.987	-0.500923	0.243318	-2.05872	0.0395208	0.126797	2R
ASTEI00221	188.439	-0.255229	0.196118	-1.3014	0.19312	0.31373	2R
ASTEI00222	2965.54	-0.14683	0.0976195	-1.50411	0.132553	0.246971	2R
ASTEI00224	1084.1	-0.308184	0.191788	-1.6069	0.108076	0.218573	2R
ASTEI00225	3.27139	0.795366	0.994094	0.800091	0.423658	NA	2R
ASTEI00227	41.5671	-0.664638	0.292068	-2.27562	0.0228686	0.0979377	2R
ASTEI00228	221.494	-0.238043	0.237395	-1.00273	0.31599	0.438141	2R
ASTEI00229	17.3369	1.35436	0.503493	2.68992	0.00714693	0.0552741	2R
ASTEI00230	230.681	-0.529521	0.249509	-2.12225	0.0338168	0.118063	2R
ASTEI00231	598.455	-0.524164	0.197693	-2.65141	0.00801567	0.0587797	2R
ASTEI00232	525.553	-0.380891	0.187616	-2.03017	0.0423395	0.131385	2R
ASTEI00233	471.744	1.11487	0.573198	1.94501	0.0517741	0.146	2R
ASTEI00234	610.208	-0.462189	0.17222	-2.68372	0.00728083	0.0555697	2R
ASTEI00235	345.16	1.21206	0.377631	3.20964	0.00132902	0.0216795	2R
ASTEI00236	282.234	0.285133	0.19988	1.42652	0.153719	0.270612	2R
ASTEI00237	63.1735	-1.09922	0.390247	-2.81674	0.00485141	0.0456903	2R
ASTEI00238	845.812	-0.315828	0.148937	-2.12055	0.0339596	0.118116	2R
ASTEI00239	111.301	-0.550207	0.268459	-2.0495	0.040413	0.127911	2R
ASTEI00240	226.706	-0.568354	0.251271	-2.26192	0.0237025	0.0995203	2R
ASTEI00241	324.333	0.321082	0.269584	1.19103	0.233642	0.356557	2R
ASTEI00242	168.463	-0.586201	0.237055	-2.47284	0.0134043	0.0760448	2R
ASTEI00243	308.945	0.0367863	0.207726	0.17709	0.859438	0.901774	2R
ASTEI00244	2.71187	3.08073	1.63331	1.88619	0.0592697	NA	2R
ASTEI00245	0.801194	1.77973	1.77222	1.00424	0.315263	NA	2R
ASTEI00246	8.8613	0.94209	0.79526	1.18463	0.236163	0.358641	2R
ASTEI00247	71.5335	1.1419	0.745101	1.53254	0.125389	0.238319	2R
ASTEI00248	61.9525	0.552736	0.647112	0.854157	0.393018	0.512108	2R
ASTEI00249	111.082	0.202352	0.200334	1.01007	0.312461	0.435166	2R
ASTEI00250	448.867	-0.0974536	0.245869	-0.396364	0.691837	0.773446	2R
ASTEI00251	103.938	-0.264015	0.205775	-1.28303	0.199483	0.320056	2R
ASTEI00252	99.482	0.459044	0.290899	1.57802	0.114561	0.226442	2R
ASTEI00253	440.54	0.169415	0.14976	1.13124	0.257954	0.381357	2R
ASTEI00254	55.4425	0.581985	0.294717	1.97473	0.0482992	0.141464	2R
ASTEI00255	933.922	-0.259199	0.162144	-1.59858	0.109915	0.220721	2R
ASTEI00256	462.651	1.32812	0.589886	2.25148	0.0243553	0.100853	2R
ASTEI00257	20.8134	0.626693	0.487654	1.28512	0.198751	0.319622	2R
ASTEI00258	352.095	1.39267	0.629169	2.2135	0.026863	0.106062	2R
ASTEI00259	90.5894	1.19345	0.681377	1.75152	0.0798558	0.184381	2R
ASTEI00260	175.303	1.2524	0.738622	1.69558	0.0899646	0.19604	2R
ASTEI00261	335.729	1.53211	0.783174	1.95628	0.0504318	0.144229	2R
ASTEI00262	127.977	1.91076	0.815192	2.34393	0.0190815	0.0894531	2R
ASTEI00263	240.227	0.722647	0.458648	1.5756	0.115117	0.227084	2R
ASTEI00264	239.046	0.633062	0.461128	1.37285	0.169797	0.288145	2R
ASTEI00265	156.993	-0.516268	0.23833	-2.16619	0.0302965	0.111551	2R
ASTEI00266	191.234	0.0816739	0.201052	0.406233	0.684571	0.767285	2R
ASTEI00267	448.518	-0.283631	0.15108	-1.87735	0.0604697	0.158076	2R
ASTEI00268	421.884	0.633665	0.370003	1.7126	0.0867869	0.192362	2R
ASTEI00269	124.69	-0.306425	0.314232	-0.975154	0.329484	0.450744	2R
ASTEI00270	2.10059	-3.10872	1.5771	-1.97116	0.0487056	NA	2R
ASTEI00271	1910.34	-0.315954	0.186017	-1.69852	0.0894095	0.195491	2R
ASTEI00272	129.877	-0.603175	0.267753	-2.25273	0.0242762	0.100656	2R
ASTEI00273	88.7098	-0.153916	0.326656	-0.471186	0.637508	0.729802	2R
ASTEI00274	181.787	0.1107	0.20317	0.544865	0.585846	0.684618	2R
ASTEI00275	737.835	-0.232028	0.171517	-1.35279	0.176121	0.295036	2R
ASTEI00276	93.7572	0.450824	0.425272	1.06009	0.289106	0.411368	2R
ASTEI00277	359.277	-0.466242	0.208551	-2.23562	0.0253766	0.102848	2R
ASTEI00278	417.668	-0.217562	0.21441	-1.0147	0.310249	0.432716	2R
ASTEI00279	4.50437	-0.871334	0.871329	-1.00001	0.317308	0.439468	2R
ASTEI00280	0.297251	-1.78069	4.17379	-0.426636	0.669645	NA	2R
ASTEI00281	21.9291	-0.483634	0.416442	-1.16135	0.245501	0.36876	2R
ASTEI00282	24.14	1.93517	0.585983	3.30244	0.000958479	0.0182668	2R
ASTEI00283	275.893	0.0237001	0.158101	0.149904	0.88084	0.917356	2R
ASTEI00284	591.394	1.10051	0.426088	2.58282	0.00979956	0.0651425	2R
ASTEI00285	19.6982	0.394795	0.457809	0.862358	0.388491	0.507658	2R
ASTEI00286	183.226	-1.307	0.354905	-3.68268	0.000230795	0.00728401	2R
ASTEI00287	11.9048	1.21713	0.661435	1.84013	0.0657496	0.164861	2R
ASTEI00288	202.771	0.48435	0.238776	2.02847	0.0425125	0.131689	2R
ASTEI00289	1350.95	-0.291283	0.157291	-1.85187	0.0640443	0.162533	2R
ASTEI00290	90.7887	0.571723	0.561699	1.01785	0.308751	0.431373	2R
ASTEI00291	123.71	-0.620094	0.286024	-2.16798	0.0301603	0.111323	2R
ASTEI00292	583.9	-0.308345	0.189219	-1.62957	0.103193	0.212328	2R
ASTEI00293	10.706	2.35462	0.759162	3.1016	0.00192479	0.0272769	2R
ASTEI00294	40.8833	1.38544	0.704388	1.96687	0.0491984	0.142716	2R
ASTEI00296	195.739	1.38056	0.542216	2.54615	0.010892	0.0685515	2R
ASTEI00297	363.262	-0.465004	0.20782	-2.23754	0.0252513	0.102578	2R
ASTEI00298	135.644	-0.359192	0.230213	-1.56026	0.118699	0.231469	2R
ASTEI00299	2092.02	-0.502914	0.206149	-2.43957	0.0147048	0.0792652	2R
ASTEI00300	116.44	-0.364198	0.240078	-1.51699	0.129268	0.243184	2R
ASTEI00301	350.546	-0.49884	0.247944	-2.0119	0.04423	0.134587	2R
ASTEI00302	108.742	-0.0102573	0.187041	-0.05484	0.956266	0.969374	2R
ASTEI00303	193.643	1.34511	0.258686	5.19978	1.99522e-07	3.67576e-05	2R
ASTEI00304	49.1734	0.984585	0.588308	1.67359	0.0942117	0.201613	2R
ASTEI00305	32.8809	0.677215	0.661539	1.0237	0.305979	0.428983	2R
ASTEI00306	583.4	-0.570729	0.227697	-2.50653	0.0121922	0.0726767	2R
ASTEI00309	22.4834	0.365034	0.495253	0.737067	0.461082	0.574492	2R
ASTEI00310	24.1272	-0.226303	0.418213	-0.541119	0.588425	0.686562	2R
ASTEI00311	107.258	-0.764606	0.245093	-3.11965	0.00181065	0.0263713	2R
ASTEI00312	421.992	-0.303223	0.240491	-1.26085	0.207363	0.328087	2R
ASTEI00313	51.7823	-0.247648	0.282057	-0.878007	0.37994	0.499316	2R
ASTEI00314	85.6263	-0.527557	0.286074	-1.84412	0.065165	0.163995	2R
ASTEI00315	143.817	-0.22054	0.170134	-1.29628	0.19488	0.31571	2R
ASTEI00316	270.744	-0.50258	0.232922	-2.15772	0.0309497	0.112785	2R
ASTEI00317	120.315	-0.77872	0.318417	-2.4456	0.0144611	0.0787636	2R
ASTEI00318	162.258	-0.592803	0.271248	-2.18546	0.028855	0.109447	2R
ASTEI00319	128.042	-0.866955	0.324243	-2.67378	0.00750023	0.0566211	2R
ASTEI00320	163.531	1.3242	0.636597	2.08013	0.037514	0.123375	2R
ASTEI00321	766.988	1.16191	0.579735	2.00421	0.045048	0.135991	2R
ASTEI00322	261.044	-0.441589	0.291831	-1.51317	0.130236	0.244129	2R
ASTEI00323	328.121	-0.373256	0.169722	-2.19922	0.0278624	0.107715	2R
ASTEI00324	66.1116	-0.931407	0.432586	-2.15312	0.0313096	0.113501	2R
ASTEI00325	287.717	-0.285527	0.210936	-1.35362	0.175858	0.294762	2R
ASTEI00326	25.2627	-0.300445	0.493712	-0.608544	0.542827	0.647385	2R
ASTEI00327	500.072	0.249816	0.188135	1.32786	0.184226	0.304079	2R
ASTEI00328	9.21172	-0.662603	0.597056	-1.10978	0.267093	0.390564	2R
ASTEI00329	270.189	0.747067	0.400736	1.86423	0.0622887	0.160443	2R
ASTEI00330	97.0516	0.318989	0.28098	1.13527	0.256261	0.379601	2R
ASTEI00331	519.535	1.27429	0.567787	2.24431	0.0248127	0.101603	2R
ASTEI00332	133.134	0.333183	0.180752	1.84332	0.0652824	0.164042	2R
ASTEI00333	3.23369	-0.966628	0.9545	-1.01271	0.311201	NA	2R
ASTEI00334	111.935	0.235775	0.261214	0.902613	0.366731	0.486489	2R
ASTEI00335	235.164	0.434442	0.340169	1.27714	0.201553	0.322246	2R
ASTEI00336	333.469	0.954945	0.37429	2.55135	0.0107307	0.0680628	2R
ASTEI00337	402.129	-0.463535	0.239064	-1.93896	0.0525065	0.146863	2R
ASTEI00338	182.423	-0.404547	0.216862	-1.86546	0.0621165	0.160306	2R
ASTEI00339	221.912	-0.396485	0.217234	-1.82515	0.0679786	0.168121	2R
ASTEI00340	126.756	-0.501706	0.253744	-1.97721	0.0480176	0.141044	2R
ASTEI00341	177.338	0.108727	0.405665	0.268022	0.788682	0.851177	2R
ASTEI00342	70.3981	0.768844	0.595129	1.29189	0.196394	0.317464	2R
ASTEI00343	136.546	-0.105311	0.204334	-0.515387	0.606283	0.702867	2R
ASTEI00344	4.3345	-0.981719	0.81534	-1.20406	0.228566	0.35116	2R
ASTEI00345	299.9	-0.397878	0.193174	-2.05968	0.0394287	0.12661	2R
ASTEI00346	64.3104	0.175846	0.30705	0.572697	0.56685	0.668594	2R
ASTEI00347	99.6125	-0.100383	1.45819	-0.0688405	0.945117	0.962066	2R
ASTEI00348	0.55527	-0.0677112	2.52272	-0.0268406	0.978587	NA	2R
ASTEI00349	0.386853	-1.87504	2.62887	-0.713248	0.475692	NA	2R
ASTEI00350	52.569	1.07065	0.485516	2.20518	0.0274416	0.106935	2R
ASTEI00351	353.684	0.0802446	0.206925	0.387796	0.698167	0.778203	2R
ASTEI00352	91.3052	-0.593858	0.270545	-2.19505	0.0281603	0.108299	2R
ASTEI003524	236.574	-0.460529	0.265871	-1.73215	0.0832465	0.188358	2R
ASTEI003525	219.87	-0.657015	0.274321	-2.39506	0.0166177	0.0835739	2R
ASTEI003526	208.182	-0.905458	0.292494	-3.09565	0.00196383	0.0276808	2R
ASTEI003527	297.159	-0.522539	0.253087	-2.06466	0.0389553	0.125652	2R
ASTEI00353	353.338	-0.4761	0.213066	-2.23452	0.0254487	0.103052	2R
ASTEI00354	637.64	-0.80473	0.239477	-3.36036	0.000778407	0.0161281	2R
ASTEI00355	241.65	-0.614453	0.26759	-2.29624	0.0216619	0.0954962	2R
ASTEI00356	155.739	-0.81532	0.284846	-2.86232	0.00420558	0.0425051	2R
ASTEI00357	264.614	-0.407465	0.242604	-1.67955	0.0930448	0.199849	2R
ASTEI00362	66.2121	0.00163657	0.208383	0.00785365	0.993734	0.99525	2R
ASTEI00363	11.8552	1.75528	0.623776	2.81395	0.00489365	0.0458823	2R
ASTEI00364	182.22	-0.415908	0.21414	-1.94222	0.0521106	0.146365	2R
ASTEI00365	664.612	1.76702	0.760689	2.32291	0.0201837	0.0923526	2R
ASTEI00366	722.862	0.788752	0.373547	2.11152	0.0347276	0.119409	2R
ASTEI00367	910.652	-0.376602	0.177591	-2.12062	0.0339538	0.118116	2R
ASTEI00368	104.751	-0.136736	0.206908	-0.660856	0.508705	0.617062	2R
ASTEI00369	137.499	-0.556163	0.234277	-2.37395	0.0175988	0.0862766	2R
ASTEI00370	67.3677	0.27687	0.390211	0.709539	0.47799	0.589475	2R
ASTEI00371	247.59	-0.311717	0.212598	-1.46622	0.142587	0.257358	2R
ASTEI00372	800.411	-0.387736	0.186787	-2.07582	0.0379109	0.123981	2R
ASTEI00373	135.259	-0.505662	0.276168	-1.83099	0.0671017	0.166832	2R
ASTEI00374	690.978	0.739482	0.513619	1.43975	0.149939	0.266193	2R
ASTEI00375	76.1267	0.885741	0.598296	1.48044	0.138756	0.253361	2R
ASTEI00376	54.2256	0.746051	0.639407	1.16679	0.243297	0.366499	2R
ASTEI00377	6.08746	0.128884	0.703551	0.18319	0.854649	0.898006	2R
ASTEI00378	113.023	-0.172936	0.198012	-0.873361	0.382467	0.501722	2R
ASTEI00379	486.553	-0.623276	0.227972	-2.734	0.00625705	0.0522299	2R
ASTEI00380	4.03725	1.8552	0.824293	2.25065	0.0244074	0.100906	2R
ASTEI00381	427.45	-1.26232	0.372147	-3.39198	0.000693887	0.0153078	2R
ASTEI00382	268.52	-0.32009	0.166508	-1.92237	0.0545589	0.149724	2R
ASTEI00383	178.065	0.134235	0.1857	0.72286	0.469766	0.582204	2R
ASTEI00384	1245.62	0.187239	0.242061	0.77352	0.439215	0.555151	2R
ASTEI00385	1282.75	-0.0133101	0.269176	-0.0494474	0.960563	0.972322	2R
ASTEI00386	496.345	0.0782954	0.33743	0.232034	0.816512	0.871715	2R
ASTEI00387	594.877	-0.216276	0.12442	-1.73827	0.0821626	0.186923	2R
ASTEI00388	514.118	-0.50559	0.215361	-2.34764	0.0188927	0.0892691	2R
ASTEI00389	530.779	0.0869503	0.147124	0.591002	0.554519	0.657595	2R
ASTEI00390	396.773	-0.497015	0.238214	-2.08642	0.0369403	0.122724	2R
ASTEI00391	301.247	0.0464964	0.233558	0.199079	0.842201	0.889108	2R
ASTEI00392	401.569	0.633802	0.261001	2.42835	0.0151678	0.0803618	2R
ASTEI00393	962.09	-0.535862	0.15861	-3.37848	0.000728886	0.0157815	2R
ASTEI00394	116.883	-0.263193	0.205119	-1.28313	0.199448	0.320056	2R
ASTEI00395	499.925	0.139769	0.203282	0.687564	0.491728	0.601892	2R
ASTEI00396	549.91	0.348348	0.236284	1.47428	0.140407	0.255221	2R
ASTEI00397	82.5957	0.553254	0.420558	1.31552	0.188334	0.308197	2R
ASTEI00398	165.018	0.217904	0.187523	1.16201	0.245232	0.36841	2R
ASTEI00399	95.1445	-0.167747	0.240147	-0.698517	0.484854	0.5957	2R
ASTEI00400	44.9567	-0.274985	0.341021	-0.806357	0.420037	0.537969	2R
ASTEI00401	159.237	-0.201705	0.227865	-0.885198	0.37605	0.495558	2R
ASTEI00402	197.004	-0.190433	0.163542	-1.16443	0.244248	0.36751	2R
ASTEI00403	267.611	-0.188285	0.175239	-1.07445	0.282622	0.405174	2R
ASTEI00404	871.966	-0.146571	0.110964	-1.32089	0.186539	0.306214	2R
ASTEI00406	266.23	0.439029	0.39889	1.10063	0.271059	0.394074	2R
ASTEI00407	0.168674	0.850401	4.40736	0.19295	0.846998	NA	2R
ASTEI00409	71.7795	0.266926	0.225737	1.18247	0.237021	0.359604	2R
ASTEI00410	162.278	-0.939762	0.26712	-3.51812	0.000434617	0.0115542	2R
ASTEI00411	72.3476	0.544363	0.326134	1.66914	0.0950896	0.202553	2R
ASTEI00412	162.839	-0.0318006	0.151362	-0.210096	0.833593	0.883975	2R
ASTEI00413	248.045	0.178223	0.241425	0.738213	0.460385	0.57376	2R
ASTEI00414	90.7327	1.6628	0.73712	2.25581	0.0240825	0.100194	2R
ASTEI00415	115.626	-0.31719	0.209662	-1.51286	0.130314	0.244188	2R
ASTEI00416	213.316	-0.438155	0.221587	-1.97735	0.0480021	0.141044	2R
ASTEI00417	206.406	-0.397542	0.231503	-1.71722	0.0859393	0.1914	2R
ASTEI00418	236.228	0.163648	0.139871	1.16999	0.242005	0.365023	2R
ASTEI00419	76.2135	0.12736	0.217686	0.58506	0.558507	0.660817	2R
ASTEI00420	443.332	0.679622	0.410634	1.65505	0.0979136	0.20605	2R
ASTEI00421	30.1996	0.458637	0.55617	0.824635	0.409579	0.527534	2R
ASTEI00422	71.2669	1.31148	0.605643	2.16543	0.030355	0.111649	2R
ASTEI00423	22.0329	0.174762	0.411524	0.424672	0.671076	0.756194	2R
ASTEI00424	281.678	-0.61319	0.264426	-2.31895	0.020398	0.0928877	2R
ASTEI00425	4.41911	-1.07167	0.831227	-1.28927	0.197306	0.318412	2R
ASTEI00426	12.4652	0.10045	0.49744	0.201934	0.839969	0.888075	2R
ASTEI00427	16.4328	-0.149971	0.41238	-0.363672	0.716103	0.793061	2R
ASTEI00428	1071.9	0.577004	0.253122	2.27955	0.0226344	0.0975314	2R
ASTEI00429	282.887	0.199854	0.208454	0.958745	0.337687	0.45856	2R
ASTEI00430	763.086	-1.30938	0.26832	-4.87992	1.06127e-06	0.000146637	2R
ASTEI00431	171.885	-0.475568	0.16838	-2.82438	0.00473726	0.045372	2R
ASTEI00432	431.745	-0.657169	0.251847	-2.60939	0.00907032	0.0628281	2R
ASTEI00433	273.013	0.818051	0.490801	1.66677	0.0955607	0.203153	2R
ASTEI00434	243.757	-0.764392	0.259314	-2.94775	0.00320094	0.0368328	2R
ASTEI00435	108.159	0.465172	0.33767	1.3776	0.168328	0.286578	2R
ASTEI00436	85.8652	-0.455501	0.289751	-1.57204	0.11594	0.228172	2R
ASTEI00437	659.646	-0.202812	0.121683	-1.66672	0.0955694	0.203153	2R
ASTEI00438	97.8585	-0.612143	0.242363	-2.52572	0.011546	0.070738	2R
ASTEI00439	117.991	0.0829623	0.18357	0.451939	0.651313	0.739999	2R
ASTEI00440	58.9621	-0.677642	0.374824	-1.80789	0.0706229	0.171709	2R
ASTEI00441	88.1442	0.0286919	0.26897	0.106673	0.915048	0.94159	2R
ASTEI00442	40.9795	-0.132252	0.389172	-0.339829	0.733986	0.808092	2R
ASTEI00443	16.4976	-0.51255	0.456833	-1.12196	0.261878	0.38499	2R
ASTEI00444	0.702799	2.35183	1.97319	1.19189	0.233304	NA	2R
ASTEI00445	1480.48	-0.225964	0.225399	-1.00251	0.316099	0.438141	2R
ASTEI00446	73.8654	-0.72483	0.356514	-2.03311	0.0420419	0.130965	2R
ASTEI00447	0.239914	0.752586	4.37056	0.172194	0.863285	NA	2R
ASTEI00448	15.8566	0.0823358	0.520958	0.158047	0.87442	0.912389	2R
ASTEI00449	999.93	-0.195696	0.170802	-1.14575	0.2519	0.37494	2R
ASTEI00450	5394.26	0.20708	0.161259	1.28414	0.199092	0.319917	2R
ASTEI00451	468.967	0.821995	0.559558	1.46901	0.141831	0.256552	2R
ASTEI00452	38.1534	0.50538	0.357398	1.41405	0.157346	0.274969	2R
ASTEI00453	6116.83	-0.640507	0.170913	-3.74757	0.000178558	0.00599055	2R
ASTEI00454	253.939	0.694305	0.292716	2.37194	0.0176949	0.0864252	2R
ASTEI00455	253.495	-0.635153	0.351929	-1.80477	0.0711101	0.172375	2R
ASTEI00456	85.017	0.419511	0.406385	1.0323	0.301932	0.425012	2R
ASTEI00457	211.462	0.225354	0.312954	0.720089	0.47147	0.583765	2R
ASTEI00458	509.703	-0.10456	0.202938	-0.515228	0.606394	0.702919	2R
ASTEI00459	301.613	0.175775	0.220742	0.796291	0.425863	0.542848	2R
ASTEI00460	55.257	-0.444816	0.332205	-1.33898	0.180577	0.299736	2R
ASTEI00461	89.183	-0.0313538	0.24313	-0.128959	0.89739	0.930164	2R
ASTEI00462	20.3138	0.205219	0.400655	0.512209	0.608505	0.704821	2R
ASTEI00463	207.901	-0.306573	0.30699	-0.998644	0.317967	0.440091	2R
ASTEI00464	3092.2	-0.156358	0.0748005	-2.09034	0.0365872	0.122438	2R
ASTEI00465	224.704	-0.562765	0.252734	-2.22671	0.0259667	0.104154	2R
ASTEI00466	10.5117	0.608104	0.602988	1.00849	0.313221	0.435647	2R
ASTEI00467	55.9569	-0.0881561	0.331447	-0.265973	0.79026	0.852004	2R
ASTEI00468	703.337	-0.369166	0.246599	-1.49703	0.134386	0.248977	2R
ASTEI00469	32.3791	1.00169	0.510047	1.96391	0.0495403	0.143075	2R
ASTEI00470	2035.26	0.043022	0.102077	0.421466	0.673415	0.758422	2R
ASTEI00472	117.541	0.58576	0.420309	1.39364	0.163426	0.282028	2R
ASTEI00473	95.6766	1.17251	0.620829	1.88862	0.0589429	0.155778	2R
ASTEI00474	150.347	0.454646	0.273006	1.66533	0.0958465	0.203371	2R
ASTEI00475	498.201	-0.449991	0.212916	-2.11347	0.0345604	0.11914	2R
ASTEI00476	156.939	-0.178696	0.370241	-0.482648	0.629346	0.723613	2R
ASTEI00477	791.035	0.318137	0.232981	1.36551	0.172094	0.290914	2R
ASTEI00478	414.095	0.258033	0.253092	1.01952	0.307954	0.430889	2R
ASTEI00479	117.823	-0.605247	0.25147	-2.40684	0.0160913	0.0825074	2R
ASTEI00480	27.3492	0.588226	0.542372	1.08454	0.278124	0.401045	2R
ASTEI00481	22.6118	0.351902	0.538873	0.653033	0.513735	0.621736	2R
ASTEI00482	10.1466	0.912225	0.552078	1.65235	0.0984637	0.206876	2R
ASTEI00483	159.288	-0.537487	0.244787	-2.19574	0.0281108	0.108287	2R
ASTEI00484	155.337	-0.487767	0.213859	-2.28078	0.0225612	0.0973357	2R
ASTEI00485	0.144803	-1.07313	4.40736	-0.243485	0.807629	NA	2R
ASTEI00486	0.760916	1.39407	2.21899	0.628244	0.529844	NA	2R
ASTEI00487	131.439	-0.514899	0.263313	-1.95546	0.0505288	0.14434	2R
ASTEI00488	250.82	-0.0674472	0.18455	-0.365467	0.714763	0.791993	2R
ASTEI00489	23.9737	-1.20615	0.639269	-1.88677	0.0591912	0.156221	2R
ASTEI00490	737.849	-0.320368	0.166272	-1.92677	0.054008	0.149069	2R
ASTEI00491	46.5294	0.045143	0.277241	0.16283	0.870653	0.910177	2R
ASTEI00492	257.202	-0.322045	0.194769	-1.65347	0.0982343	0.206464	2R
ASTEI00493	259.368	-0.671802	0.253616	-2.6489	0.0080755	0.0589471	2R
ASTEI00494	104.193	0.773717	0.737977	1.04843	0.294441	0.416926	2R
ASTEI00495	702.572	0.482322	0.399197	1.20823	0.226959	0.350073	2R
ASTEI00496	120.223	-0.402409	0.31541	-1.27583	0.202017	0.322666	2R
ASTEI00497	497.575	0.743444	0.374959	1.98274	0.047397	0.140065	2R
ASTEI00498	906.104	0.490646	0.247509	1.98234	0.0474417	0.140097	2R
ASTEI00499	209.666	-0.592143	0.205788	-2.87744	0.0040092	0.0414784	2R
ASTEI00500	651.694	1.11626	0.639233	1.74625	0.0807677	0.185513	2R
ASTEI00501	661.528	0.0737885	0.111471	0.661953	0.508001	0.616351	2R
ASTEI00502	160.731	1.38363	0.63997	2.16202	0.0306167	0.112062	2R
ASTEI00503	157.758	-0.491671	0.252136	-1.95003	0.0511728	0.145431	2R
ASTEI00504	219.709	0.0468384	0.186279	0.251443	0.801472	0.860463	2R
ASTEI00505	106.858	0.153905	0.226859	0.678417	0.497508	0.607056	2R
ASTEI00506	96.3457	-0.430811	0.300837	-1.43204	0.152132	0.268768	2R
ASTEI00507	443.471	-0.120789	0.161565	-0.747616	0.454692	0.569028	2R
ASTEI00508	275.804	-0.152383	0.142153	-1.07196	0.283736	0.406039	2R
ASTEI00509	261.27	-0.338255	0.165763	-2.04059	0.0412918	0.129319	2R
ASTEI00510	268.991	-0.543987	0.201296	-2.70243	0.00688347	0.0545188	2R
ASTEI00511	922.939	-0.0813216	0.148168	-0.548847	0.583111	0.682256	2R
ASTEI00512	42.8544	0.448844	0.304958	1.47182	0.141069	0.256026	2R
ASTEI00513	238.412	-0.287178	0.190712	-1.50582	0.132114	0.246417	2R
ASTEI00514	219.522	1.19799	0.491304	2.43838	0.0147533	0.0793262	2R
ASTEI00515	229.626	-0.506169	0.238824	-2.11942	0.0340549	0.118296	2R
ASTEI00516	125.504	0.659432	0.271388	2.42985	0.0151052	0.0801516	2R
ASTEI00517	205.619	-0.514942	0.236306	-2.17914	0.0293215	0.109966	2R
ASTEI00518	505.158	-0.468826	0.171338	-2.73626	0.0062142	0.0520103	2R
ASTEI00519	627.262	-0.127392	0.158057	-0.805989	0.420249	0.538044	2R
ASTEI00520	234.466	-0.364716	0.18528	-1.96846	0.0490156	0.142388	2R
ASTEI00521	278.81	-0.138566	0.250912	-0.552249	0.580778	0.680664	2R
ASTEI00522	0.361223	-0.111365	4.08533	-0.0272598	0.978253	NA	2R
ASTEI00523	0.273954	-2.00797	4.20435	-0.477595	0.632939	NA	2R
ASTEI00524	42.7241	0.912372	0.579101	1.5755	0.115142	0.227084	2R
ASTEI00525	0.912111	0.232582	1.42689	0.163	0.870519	NA	2R
ASTEI00526	0.299692	-1.07314	3.34514	-0.320805	0.748358	NA	2R
ASTEI00527	1.91336	1.40772	1.47922	0.951664	0.341268	NA	2R
ASTEI00528	1.11686	-0.189981	1.60199	-0.11859	0.9056	NA	2R
ASTEI00529	0.497954	0.840124	3.05285	0.275193	0.783168	NA	2R
ASTEI00530	28.4788	-0.707123	0.3995	-1.77002	0.0767239	0.180241	2R
ASTEI00531	0.256321	-0.965106	4.37243	-0.220725	0.825306	NA	2R
ASTEI00532	55.7901	0.71012	0.489743	1.44999	0.147063	0.262746	2R
ASTEI00533	146.492	0.555513	0.509795	1.08968	0.275855	0.399166	2R
ASTEI00534	430.198	-0.529016	0.226081	-2.33995	0.0192866	0.0900526	2R
ASTEI00535	293.919	-0.362592	0.249565	-1.4529	0.146253	0.261808	2R
ASTEI00536	188.908	-0.369947	0.234767	-1.5758	0.115071	0.227084	2R
ASTEI00537	9.13818	-0.300872	0.745325	-0.403679	0.686449	0.768814	2R
ASTEI00538	6.75054	0.598485	0.666957	0.897337	0.369539	0.489163	2R
ASTEI00539	162.293	-0.44532	0.233102	-1.91041	0.0560802	0.152027	2R
ASTEI00540	652.016	-0.195934	0.144504	-1.35591	0.175129	0.293951	2R
ASTEI00541	296.871	0.14549	0.181685	0.800782	0.423258	0.540512	2R
ASTEI00542	5.50968	-0.309467	0.780374	-0.396563	0.69169	0.773364	2R
ASTEI00543	88.9383	-0.350934	0.249134	-1.40862	0.158949	0.276849	2R
ASTEI00544	645.087	-0.162197	0.142432	-1.13876	0.254802	0.37792	2R
ASTEI00545	68.6969	1.37277	0.65895	2.08327	0.0372269	0.122997	2R
ASTEI00546	849.761	0.855143	0.525088	1.62857	0.103404	0.212536	2R
ASTEI00547	350.458	0.909761	0.545058	1.66911	0.0950955	0.202553	2R
ASTEI00548	156.173	-0.11978	0.211804	-0.565524	0.571718	0.672899	2R
ASTEI00549	114.465	1.00537	0.682028	1.4741	0.140456	0.255266	2R
ASTEI00550	236.036	-0.0868603	0.233635	-0.371777	0.710059	0.787945	2R
ASTEI00551	449.166	-0.0478691	0.179705	-0.266376	0.78995	0.851845	2R
ASTEI00552	179.021	0.326626	0.234415	1.39336	0.16351	0.282034	2R
ASTEI00553	134.37	0.0987911	0.188812	0.523224	0.600818	0.698228	2R
ASTEI00554	105.977	-0.629606	0.252574	-2.49276	0.0126754	0.0740294	2R
ASTEI00555	1614.73	-0.283922	0.109597	-2.59061	0.00958069	0.06447	2R
ASTEI00556	636.33	0.836015	0.348879	2.39629	0.016562	0.0835735	2R
ASTEI00557	196.871	1.02741	0.61347	1.67476	0.0939815	0.201326	2R
ASTEI00558	434.67	-0.21386	0.203699	-1.04988	0.293772	0.416372	2R
ASTEI00559	387.46	-0.296026	0.191989	-1.5419	0.123099	0.236318	2R
ASTEI00560	10.0605	3.04523	0.643847	4.72974	2.24804e-06	0.000256595	2R
ASTEI00561	192.697	-0.36008	0.169768	-2.12101	0.0339209	0.118116	2R
ASTEI00562	522.625	-0.480409	0.21615	-2.22258	0.0262444	0.104708	2R
ASTEI00563	718.325	-0.4797	0.195103	-2.4587	0.0139441	0.0775154	2R
ASTEI00564	39.0651	0.660657	0.299282	2.20747	0.027281	0.106616	2R
ASTEI00565	265.845	0.251164	0.252473	0.994817	0.319825	0.44179	2R
ASTEI00566	93.1757	-0.490519	0.328836	-1.49168	0.135782	0.250264	2R
ASTEI00567	312.983	-0.419011	0.198912	-2.10652	0.0351594	0.120107	2R
ASTEI00568	1261.15	-0.0966708	0.164186	-0.588787	0.556004	0.658761	2R
ASTEI00569	80.3237	-0.597352	0.29076	-2.05445	0.0399324	0.12734	2R
ASTEI00570	46.0926	1.38781	0.398534	3.48229	0.000497141	0.0124002	2R
ASTEI00571	158.104	0.288883	0.208793	1.38359	0.166485	0.284701	2R
ASTEI00572	130.424	0.0114529	0.241022	0.0475182	0.9621	0.973237	2R
ASTEI00573	1785.47	-0.180488	0.153876	-1.17294	0.24082	0.363759	2R
ASTEI00574	531.117	-0.574723	0.180355	-3.18662	0.00143947	0.0227078	2R
ASTEI00575	227.408	0.476081	0.373217	1.27561	0.202092	0.322666	2R
ASTEI00576	357.268	-0.227959	0.204381	-1.11536	0.264695	0.38799	2R
ASTEI00577	136.715	0.162816	0.252453	0.644935	0.51897	0.62669	2R
ASTEI00578	691.241	0.145435	0.290698	0.500297	0.616866	0.712776	2R
ASTEI00579	91.0822	0.268402	0.491189	0.546434	0.584768	0.683813	2R
ASTEI00580	0.329719	0.756299	3.20335	0.236096	0.813358	NA	2R
ASTEI00581	0.825464	3.07404	2.03918	1.50749	0.131685	NA	2R
ASTEI00582	11.9219	-0.694112	0.581069	-1.19454	0.232266	0.355232	2R
ASTEI00583	1.45613	-0.451835	1.29645	-0.348517	0.727452	NA	2R
ASTEI00584	1102.01	-0.140272	0.0942024	-1.48905	0.136475	0.250949	2R
ASTEI00585	652.495	0.301742	0.22426	1.3455	0.178464	0.297657	2R
ASTEI00586	396.827	-0.0910689	0.207012	-0.439921	0.659994	0.747234	2R
ASTEI00587	328.604	-0.788946	0.294814	-2.67608	0.00744899	0.0563314	2R
ASTEI00588	301.111	0.0890816	0.194292	0.458493	0.646599	0.736995	2R
ASTEI00589	1.5949	1.1341	1.2476	0.909024	0.363338	NA	2R
ASTEI00590	0.697029	1.36961	1.95778	0.699571	0.484195	NA	2R
ASTEI00591	847.561	-0.661944	0.223604	-2.96034	0.00307304	0.0360837	2R
ASTEI00592	14.0055	-0.037018	0.562339	-0.0658286	0.947514	0.963852	2R
ASTEI00593	128.589	-0.671475	0.190069	-3.53279	0.000411202	0.0112157	2R
ASTEI00594	156.394	0.751269	0.572822	1.31152	0.189681	0.309966	2R
ASTEI00595	2.42075	-1.99718	1.52177	-1.3124	0.189385	NA	2R
ASTEI00597	159.029	-1.39696	0.448028	-3.11802	0.00182071	0.0264671	2R
ASTEI00598	56.5715	-1.38283	0.514933	-2.68546	0.007243	0.0555697	2R
ASTEI00599	83.7392	0.783595	0.725861	1.07954	0.280347	0.402909	2R
ASTEI00600	761.643	-0.353166	0.176256	-2.0037	0.0451017	0.136057	2R
ASTEI00601	159.397	-0.542555	0.206184	-2.63141	0.00850321	0.0608257	2R
ASTEI00602	164.92	-0.137485	0.253099	-0.543205	0.586988	0.685427	2R
ASTEI00603	94.5112	0.0801356	0.417734	0.191834	0.847872	0.893119	2R
ASTEI00604	107.138	-0.654196	0.268221	-2.43902	0.0147271	0.0792652	2R
ASTEI00605	221.088	-0.708298	0.224558	-3.15419	0.00160943	0.0243877	2R
ASTEI00606	60.8552	0.182505	0.271713	0.671682	0.501786	0.610574	2R
ASTEI00607	113.166	0.404281	0.560806	0.720892	0.470976	0.58329	2R
ASTEI00608	1.21502	1.31323	1.63799	0.801732	0.422708	NA	2R
ASTEI00609	0.197538	-2.0827	4.35979	-0.477706	0.63286	NA	2R
ASTEI00610	97.4801	-0.330096	0.250512	-1.31768	0.18761	0.307415	2R
ASTEI00611	490.257	0.292176	0.112455	2.59816	0.00937243	0.0638262	2R
ASTEI00612	35.926	0.189138	0.415459	0.455252	0.648928	0.738768	2R
ASTEI00613	1812.59	-0.279146	0.225462	-1.23811	0.215676	0.337277	2R
ASTEI00614	212.993	0.968375	0.630394	1.53614	0.124504	0.237625	2R
ASTEI00615	188.837	0.206405	0.221621	0.931346	0.351675	0.471038	2R
ASTEI00616	323.983	-0.237617	0.192255	-1.23595	0.216479	0.338029	2R
ASTEI00617	48.359	-0.100188	0.289451	-0.346131	0.729244	0.804407	2R
ASTEI00618	40.357	-0.920193	0.403605	-2.27993	0.0226117	0.0975137	2R
ASTEI00619	426.28	1.09594	0.600921	1.82377	0.068187	0.168479	2R
ASTEI00620	13.2213	-1.0076	0.521989	-1.93031	0.0535678	0.148499	2R
ASTEI00621	256.088	0.321991	0.204608	1.5737	0.115557	0.22771	2R
ASTEI00622	7.75194	-0.286526	0.519816	-0.551206	0.581492	0.681109	2R
ASTEI00623	299.819	-0.235273	0.176362	-1.33404	0.182191	0.301527	2R
ASTEI00624	21.5385	-0.494527	0.504625	-0.979988	0.327092	0.448406	2R
ASTEI00625	97.934	-0.394841	0.242298	-1.62957	0.103193	0.212328	2R
ASTEI00626	413.446	1.43724	0.406486	3.53578	0.000406569	0.0111182	2R
ASTEI00628	173.203	0.972604	0.448617	2.16801	0.0301581	0.111323	2R
ASTEI00629	1.68628	-0.866144	1.27182	-0.681027	0.495855	NA	2R
ASTEI00630	176.53	-0.259274	0.195618	-1.32541	0.185037	0.304604	2R
ASTEI00631	143.403	-0.245921	0.202125	-1.21668	0.223725	0.345949	2R
ASTEI00632	312.337	0.71011	0.361738	1.96305	0.0496403	0.143284	2R
ASTEI00633	103.259	1.29931	0.458742	2.83233	0.004621	0.0448476	2R
ASTEI00634	48.8504	0.943625	0.650658	1.45026	0.146985	0.262677	2R
ASTEI00635	5.2205	1.22659	1.0112	1.213	0.22513	0.347762	2R
ASTEI00636	147.61	0.630246	0.459487	1.37163	0.170178	0.288583	2R
ASTEI00637	339.231	-0.272764	0.175045	-1.55825	0.119175	0.231907	2R
ASTEI00638	212.666	0.458764	0.294703	1.5567	0.119542	0.232208	2R
ASTEI00639	456.819	0.12413	0.166451	0.745746	0.455821	0.569966	2R
ASTEI00640	142.824	0.191476	0.190956	1.00272	0.315994	0.438141	2R
ASTEI00641	613.64	0.104209	0.189116	0.551032	0.581612	0.681109	2R
ASTEI00642	28.837	-0.241287	0.353434	-0.682694	0.4948	0.604455	2R
ASTEI00643	149.427	-0.469981	0.225893	-2.08055	0.0374754	0.123318	2R
ASTEI00644	151.147	-0.471721	0.211437	-2.23102	0.0256796	0.103398	2R
ASTEI00645	532.52	0.0629459	0.161112	0.390698	0.696021	0.776058	2R
ASTEI00646	434.908	-0.339368	0.167371	-2.02764	0.0425967	0.131832	2R
ASTEI00647	244.336	-0.201225	0.212848	-0.945391	0.34446	0.464216	2R
ASTEI00648	125.893	1.02527	0.740509	1.38455	0.166191	0.284508	2R
ASTEI00649	162.331	1.04773	0.468062	2.23845	0.0251915	0.102503	2R
ASTEI00650	105.743	0.918655	0.377171	2.43565	0.0148651	0.0796227	2R
ASTEI00651	78.365	-0.245155	0.257337	-0.952663	0.340761	0.461087	2R
ASTEI00652	50.2985	0.360092	0.386226	0.932335	0.351164	0.470653	2R
ASTEI00653	842.961	1.61244	0.662228	2.43488	0.0148968	0.0796227	2R
ASTEI00654	155.134	-0.636837	0.211339	-3.01334	0.00258392	0.0330094	2R
ASTEI00655	1.63945	0.504501	1.57287	0.320751	0.748399	NA	2R
ASTEI00656	0.392051	2.29873	3.91835	0.586658	0.557433	NA	2R
ASTEI00657	0.700335	0.79317	2.08468	0.380476	0.703592	NA	2R
ASTEI00658	34.7098	-0.31349	0.36825	-0.851298	0.394604	0.513728	2R
ASTEI00659	604.999	-0.42196	0.173508	-2.43194	0.0150184	0.0799331	2R
ASTEI00660	72.115	-0.555735	0.29094	-1.91013	0.0561162	0.152062	2R
ASTEI00661	15.0071	0.247299	0.574888	0.430168	0.667073	0.752895	2R
ASTEI00662	642.449	-0.49726	0.183514	-2.70965	0.00673542	0.0539782	2R
ASTEI00663	40.9863	-0.213136	0.28691	-0.742865	0.457563	0.571396	2R
ASTEI00664	679.238	0.538263	0.402221	1.33823	0.180823	0.299964	2R
ASTEI00665	130.45	-0.41688	0.229613	-1.81558	0.0694354	0.170233	2R
ASTEI00666	391.91	0.486437	0.351902	1.38231	0.166877	0.285125	2R
ASTEI00667	81.1813	0.362048	0.419514	0.86302	0.388127	0.507309	2R
ASTEI00668	178.809	-0.927571	0.310198	-2.99026	0.00278742	0.0345326	2R
ASTEI00669	374.814	1.63872	0.714719	2.29282	0.0218585	0.0958473	2R
ASTEI00670	507.384	0.417341	0.415182	1.0052	0.3148	0.437036	2R
ASTEI00671	796.675	1.22295	0.53607	2.28132	0.0225294	0.0972783	2R
ASTEI00672	1210.17	-0.0083075	0.0903764	-0.0919211	0.926761	0.949826	2R
ASTEI00673	15.3	1.07715	0.490079	2.19791	0.0279553	0.107949	2R
ASTEI00674	16.8167	-0.428584	0.430683	-0.995125	0.319676	0.44179	2R
ASTEI00675	613.429	-0.138583	0.233964	-0.592326	0.553632	0.656989	2R
ASTEI00676	931.182	-0.550824	0.221449	-2.48737	0.0128692	0.0747042	2R
ASTEI00677	102.312	-0.0102992	0.261	-0.0394603	0.968523	0.977835	2R
ASTEI00678	201.752	-0.565403	0.26722	-2.11587	0.0343559	0.118969	2R
ASTEI00679	552.734	0.983652	0.540664	1.81934	0.0688597	0.169423	2R
ASTEI00680	392.869	-0.521994	0.394033	-1.32475	0.185255	0.304915	2R
ASTEI00681	367.95	-0.390615	0.188114	-2.07648	0.0378491	0.123952	2R
ASTEI00682	20.0166	0.961789	0.410453	2.34324	0.0191173	0.0895808	2R
ASTEI00683	127.139	-0.803832	0.303746	-2.6464	0.00813546	0.0590697	2R
ASTEI00684	218.866	0.186458	0.259614	0.718214	0.472626	0.584917	2R
ASTEI00685	59.3839	0.0560311	0.226942	0.246897	0.804988	0.863363	2R
ASTEI00686	20.8934	-0.233644	0.356305	-0.655741	0.511991	0.620117	2R
ASTEI00687	219.106	0.0623299	0.170875	0.364769	0.715284	0.792369	2R
ASTEI00688	197.128	0.816365	0.315334	2.58889	0.00962869	0.0645657	2R
ASTEI00689	171.478	-0.213098	0.188763	-1.12891	0.258934	0.382429	2R
ASTEI00690	355.722	-0.0098144	0.196081	-0.0500528	0.96008	0.972209	2R
ASTEI00691	33.6854	0.198865	0.357934	0.555591	0.57849	0.678613	2R
ASTEI00692	55.7894	-0.275046	0.355798	-0.77304	0.439499	0.555443	2R
ASTEI00693	80.0218	0.838275	0.267187	3.1374	0.00170452	0.0252456	2R
ASTEI00694	89.6825	0.00804449	0.296345	0.0271456	0.978344	0.985083	2R
ASTEI00695	138.927	0.981248	0.446741	2.19646	0.0280591	0.108168	2R
ASTEI00696	635.693	-0.30398	0.173469	-1.75236	0.0797116	0.184332	2R
ASTEI00697	506.28	-0.101761	0.160001	-0.635999	0.524777	0.631814	2R
ASTEI00698	7.49335	-0.650579	0.577614	-1.12632	0.26003	0.383501	2R
ASTEI00699	192.18	-0.607953	0.265854	-2.28679	0.0222081	0.0966065	2R
ASTEI00700	224.262	1.31118	0.506881	2.58676	0.00968828	0.0647591	2R
ASTEI00701	103.802	-0.445091	0.344931	-1.29038	0.196919	0.318033	2R
ASTEI00702	984.35	-0.0561415	0.17749	-0.316308	0.751769	0.822582	2R
ASTEI00703	408.29	0.0509495	0.136452	0.373389	0.708859	0.787096	2R
ASTEI00704	69.3029	0.161228	0.367157	0.439124	0.660571	0.747727	2R
ASTEI00705	230.553	-0.174406	0.198258	-0.879689	0.379028	0.498269	2R
ASTEI00706	1506.92	-0.205759	0.183388	-1.12199	0.261868	0.38499	2R
ASTEI00707	1570.22	-0.200478	0.171443	-1.16936	0.24226	0.365233	2R
ASTEI00708	834.551	0.101165	0.0912564	1.10858	0.26761	0.390987	2R
ASTEI00709	292.359	-0.936063	0.303057	-3.08874	0.00201009	0.0279947	2R
ASTEI00710	360.442	0.902588	0.281207	3.20969	0.00132877	0.0216795	2R
ASTEI00711	37.8547	0.263727	0.311358	0.847021	0.396984	0.515997	2R
ASTEI00712	8.35562	-0.401886	0.652006	-0.616384	0.537641	0.643246	2R
ASTEI00713	730.485	0.0495877	0.21507	0.230566	0.817652	0.872489	2R
ASTEI00714	352.419	1.35766	0.418926	3.2408	0.00119193	0.0205188	2R
ASTEI00715	209.636	0.571789	0.29882	1.91349	0.0556859	0.151335	2R
ASTEI00716	3471.69	-0.0569598	0.0874758	-0.65115	0.51495	0.623054	2R
ASTEI00717	88.0513	-0.300782	0.261203	-1.15152	0.249517	0.372395	2R
ASTEI00718	6.06751	0.588414	0.696757	0.844504	0.398388	0.517372	2R
ASTEI00719	34.0933	2.35235	1.14215	2.05959	0.0394381	0.12661	2R
ASTEI00720	11.666	-1.57763	0.670203	-2.35396	0.0185748	0.0883679	2R
ASTEI00721	78.3467	0.083252	0.250664	0.332125	0.739795	0.812783	2R
ASTEI00722	1.68959	0.850427	2.18669	0.38891	0.697343	NA	2R
ASTEI00723	124.879	-0.283231	0.427481	-0.662559	0.507613	0.616163	2R
ASTEI00724	0.144803	-1.07313	4.40736	-0.243485	0.807629	NA	2R
ASTEI00725	0.225933	-0.111331	4.40736	-0.0252602	0.979847	NA	2R
ASTEI00726	2.08275	-0.388479	1.60405	-0.242186	0.808636	NA	2R
ASTEI00727	75.8328	0.0707849	0.271283	0.260926	0.794149	0.854836	2R
ASTEI00728	46.9839	0.222638	0.326408	0.682083	0.495186	0.604716	2R
ASTEI00729	2.56317	0.32482	1.28868	0.252056	0.800998	NA	2R
ASTEI00730	16.6905	0.150392	0.517164	0.290801	0.771204	0.838779	2R
ASTEI00731	484.207	0.116448	0.14562	0.799666	0.423904	0.541141	2R
ASTEI00732	121.099	-0.433126	0.322533	-1.34289	0.179308	0.298449	2R
ASTEI00733	18.2076	0.815995	0.460428	1.77225	0.0763526	0.179731	2R
ASTEI00734	771.796	0.195887	0.112378	1.74311	0.0813145	0.186356	2R
ASTEI00735	1458.04	-0.129833	0.153218	-0.847376	0.396786	0.515894	2R
ASTEI00736	139.169	0.212577	0.22855	0.930111	0.352314	0.471653	2R
ASTEI00737	390.474	0.619195	0.244561	2.53187	0.0113457	0.0700876	2R
ASTEI00738	136.856	-0.155701	0.233494	-0.666831	0.50488	0.613486	2R
ASTEI00740	77.2909	0.062266	0.270054	0.230569	0.81765	0.872489	2R
ASTEI00741	2.49949	1.35232	1.35882	0.995219	0.31963	NA	2R
ASTEI00742	15.439	-0.061019	0.409011	-0.149187	0.881406	0.917855	2R
ASTEI00743	94.4222	-1.31461	0.336391	-3.90799	9.3066e-05	0.00384758	2R
ASTEI00744	334.425	-0.435135	0.146643	-2.96731	0.00300418	0.0358081	2R
ASTEI00745	150.232	0.229387	0.225185	1.01866	0.308366	0.431131	2R
ASTEI00746	308.625	-0.239273	0.166441	-1.43758	0.150553	0.266963	2R
ASTEI00747	19.2873	0.164128	0.483876	0.339193	0.734464	0.808534	2R
ASTEI00748	109.622	-0.37745	0.277445	-1.36045	0.173688	0.292178	2R
ASTEI00749	40.5606	0.276949	0.36753	0.753542	0.451124	0.565913	2R
ASTEI00750	162.041	0.371831	0.349407	1.06418	0.287249	0.40967	2R
ASTEI00751	0.335159	-0.111374	3.25518	-0.0342143	0.972706	NA	2R
ASTEI00752	61.4369	0.788176	0.426114	1.84968	0.0643591	0.162763	2R
ASTEI00753	1026.22	-0.536538	0.207056	-2.59127	0.00956227	0.06447	2R
ASTEI00754	122.219	-0.225792	0.174283	-1.29555	0.195132	0.31607	2R
ASTEI00755	100.638	-0.18476	0.29182	-0.633129	0.52665	0.633468	2R
ASTEI00756	204.793	0.777553	0.447071	1.73922	0.0819966	0.186923	2R
ASTEI00757	32.2484	1.58533	0.714212	2.2197	0.0264394	0.10515	2R
ASTEI00758	156.326	1.2093	0.460903	2.62376	0.00869659	0.0614907	2R
ASTEI00759	128.117	0.0290975	0.293497	0.0991407	0.921027	0.946102	2R
ASTEI00760	84.5502	-0.42039	0.282892	-1.48604	0.137267	0.251473	2R
ASTEI00761	133.645	0.23564	0.21943	1.07387	0.282879	0.40535	2R
ASTEI00762	71.3685	-0.0219255	0.251267	-0.0872596	0.930465	0.952067	2R
ASTEI00763	42.6181	-0.465229	0.313414	-1.48439	0.137706	0.252013	2R
ASTEI00764	156.292	-0.5311	0.27016	-1.96587	0.0493137	0.142787	2R
ASTEI00765	88.6492	0.526764	0.269687	1.95325	0.0507903	0.144696	2R
ASTEI00766	633.045	0.469737	0.337768	1.39071	0.164313	0.282808	2R
ASTEI00767	117.298	-0.502295	0.24461	-2.05345	0.0400287	0.127415	2R
ASTEI00768	107.149	0.573349	0.288894	1.98463	0.0471856	0.139813	2R
ASTEI00769	434.961	-0.139761	0.190584	-0.733332	0.463356	0.576983	2R
ASTEI00770	508.155	-0.522107	0.191745	-2.72293	0.00647061	0.0530429	2R
ASTEI00771	523.19	0.507883	0.363944	1.3955	0.162866	0.281338	2R
ASTEI00772	298.817	-0.23964	0.13683	-1.75137	0.0798819	0.184401	2R
ASTEI00773	226.196	0.276049	0.197496	1.39775	0.162189	0.280676	2R
ASTEI00774	543.268	0.0468635	0.230249	0.203534	0.838718	0.887214	2R
ASTEI00775	113.896	0.874637	0.458075	1.90937	0.056214	0.152062	2R
ASTEI00776	69.2095	1.40942	0.695911	2.02528	0.0428382	0.132268	2R
ASTEI00777	233.804	-0.480677	0.281722	-1.70621	0.0879697	0.193942	2R
ASTEI00778	186.446	-0.435251	0.207437	-2.09823	0.0358851	0.121374	2R
ASTEI00779	105.335	-0.220512	0.336337	-0.655627	0.512064	0.620134	2R
ASTEI00780	323.893	0.394058	0.364167	1.08208	0.279217	0.401926	2R
ASTEI00781	213.406	0.0273128	0.255567	0.106872	0.914891	0.94152	2R
ASTEI00782	222.355	0.552295	0.354865	1.55635	0.119624	0.232237	2R
ASTEI00783	189.342	1.07724	0.46873	2.29821	0.0215498	0.0954025	2R
ASTEI00784	107.918	-0.376154	0.273774	-1.37396	0.169454	0.287702	2R
ASTEI00785	263.602	0.145067	0.184465	0.786418	0.431622	0.548194	2R
ASTEI00786	87.8773	-0.423612	0.260391	-1.62683	0.103773	0.212993	2R
ASTEI00787	42.0704	0.428713	0.681405	0.629161	0.529244	0.635662	2R
ASTEI00788	102.41	0.279122	0.404439	0.690144	0.490103	0.600261	2R
ASTEI00789	4.89545	1.36501	0.78891	1.73024	0.083587	0.18872	2R
ASTEI00790	406.721	0.151972	0.243076	0.625204	0.531837	0.638046	2R
ASTEI00791	66.518	-0.818815	0.285688	-2.86612	0.00415541	0.0422351	2R
ASTEI00792	194.271	1.1233	0.417504	2.69051	0.00713438	0.0552741	2R
ASTEI00793	69.3014	-0.76128	0.293873	-2.5905	0.00958362	0.06447	2R
ASTEI00794	265.238	-0.410706	0.210644	-1.94976	0.0512044	0.145442	2R
ASTEI00795	465.774	-0.0982112	0.155137	-0.633061	0.526694	0.633468	2R
ASTEI00796	82.2642	-0.328192	0.201417	-1.62941	0.103225	0.212328	2R
ASTEI00797	636.591	0.128991	0.144494	0.892712	0.372012	0.491507	2R
ASTEI00798	1.11697	-1.71105	1.63432	-1.04695	0.295123	NA	2R
ASTEI00799	104.74	0.662698	0.266555	2.48616	0.012913	0.0747638	2R
ASTEI00800	65.1666	-0.550036	0.279457	-1.96823	0.049042	0.142388	2R
ASTEI00801	15.9774	0.880022	0.689933	1.27552	0.202126	0.32267	2R
ASTEI00802	24.3509	0.93358	0.449494	2.07696	0.0378055	0.123945	2R
ASTEI00803	1.07277	3.05788	2.05919	1.48499	0.137547	NA	2R
ASTEI00804	142.472	1.71214	0.68854	2.48663	0.0128959	0.0747638	2R
ASTEI00805	292.581	1.02792	0.42124	2.44023	0.014678	0.0792468	2R
ASTEI00806	365.958	-0.155057	0.165998	-0.934094	0.350255	0.469626	2R
ASTEI00807	30.4757	0.848342	0.59343	1.42956	0.152844	0.269569	2R
ASTEI00808	77.6238	-0.594714	0.277149	-2.14583	0.0318865	0.11455	2R
ASTEI00809	195.909	-0.732095	0.261572	-2.79883	0.00512885	0.0471612	2R
ASTEI00810	628.199	-0.378601	0.167651	-2.25826	0.0239295	0.0999249	2R
ASTEI00811	1225.04	-0.363952	0.175656	-2.07196	0.0382688	0.124343	2R
ASTEI00812	42.4003	0.292701	0.303575	0.964179	0.334956	0.455914	2R
ASTEI00813	377.94	-0.223721	0.211306	-1.05876	0.289711	0.412174	2R
ASTEI00814	359.172	0.47367	0.278784	1.69906	0.0893084	0.19542	2R
ASTEI00815	88.1244	-0.396989	0.336548	-1.17959	0.238162	0.360678	2R
ASTEI00816	154.738	0.577507	0.341655	1.69032	0.0909665	0.197317	2R
ASTEI00817	3.45868	-0.0694904	0.95984	-0.0723979	0.942285	NA	2R
ASTEI00818	126.658	-0.221106	0.207066	-1.06781	0.285608	0.407994	2R
ASTEI00819	11.4357	1.30003	0.617309	2.10597	0.0352074	0.120232	2R
ASTEI00820	73.4085	1.13902	0.57159	1.99273	0.0462909	0.138245	2R
ASTEI00821	172.148	-0.448156	0.207607	-2.15868	0.0308752	0.112706	2R
ASTEI00822	88.1648	-0.696465	0.251947	-2.76433	0.00570396	0.0497899	2R
ASTEI00823	286.089	0.187659	0.448653	0.418272	0.675748	0.759909	2R
ASTEI00824	508.962	0.140074	0.133906	1.04607	0.29553	0.417999	2R
ASTEI00825	144.915	-0.00943058	0.198543	-0.0474988	0.962116	0.973237	2R
ASTEI00826	0.631709	3.07454	2.25105	1.36582	0.171994	NA	2R
ASTEI00827	158.34	0.597259	0.263216	2.26908	0.0232633	0.0986467	2R
ASTEI00828	290.723	-0.385304	0.178142	-2.16291	0.0305483	0.111968	2R
ASTEI00829	96.7651	0.573519	0.393455	1.45765	0.144937	0.260153	2R
ASTEI00830	371.477	-0.381965	0.215343	-1.77375	0.0761047	0.179308	2R
ASTEI00831	578.155	0.611431	0.305541	2.00114	0.045377	0.13652	2R
ASTEI00832	100.317	0.318547	0.196042	1.6249	0.104185	0.213305	2R
ASTEI00833	131.296	0.0657479	0.193113	0.340464	0.733507	0.807735	2R
ASTEI00834	373.05	0.0827544	0.138785	0.596275	0.550991	0.654817	2R
ASTEI00835	204.822	-0.54622	0.243795	-2.24049	0.0250592	0.102272	2R
ASTEI00836	287.531	0.383069	0.167928	2.28115	0.0225397	0.0972829	2R
ASTEI00837	75.9988	-0.28179	0.255085	-1.10469	0.269293	0.392484	2R
ASTEI00838	497.934	-0.357502	0.213596	-1.67373	0.094183	0.201613	2R
ASTEI00839	209.322	0.735812	0.402939	1.82611	0.0678336	0.167919	2R
ASTEI00840	161.059	0.929593	0.724651	1.28281	0.199557	0.320127	2R
ASTEI00841	248.66	-0.408811	0.170978	-2.39101	0.0168019	0.0841378	2R
ASTEI00842	294.533	0.573649	0.379006	1.51356	0.130137	0.244073	2R
ASTEI00843	397.287	-0.0545655	0.120227	-0.453854	0.649934	0.739512	2R
ASTEI00844	206.136	-0.514358	0.253502	-2.02901	0.0424576	0.131615	2R
ASTEI00845	918.862	-0.255592	0.183095	-1.39595	0.162728	0.281147	2R
ASTEI00846	289.72	-0.213043	0.172642	-1.23401	0.217198	0.338748	2R
ASTEI00847	34.8828	0.996347	0.366738	2.71678	0.00659201	0.0533303	2R
ASTEI00848	491.785	0.175538	0.149396	1.17498	0.240001	0.362834	2R
ASTEI00849	76.949	1.53763	0.485506	3.16707	0.00153984	0.0236747	2R
ASTEI00850	2637.01	-0.538861	0.195331	-2.75871	0.00580305	0.0501959	2R
ASTEI00851	234.626	-0.431989	0.283146	-1.52568	0.127091	0.240378	2R
ASTEI00852	269.715	-0.0467446	0.140859	-0.331854	0.739999	0.812897	2R
ASTEI00853	1128.35	0.162473	0.195146	0.832569	0.405088	0.523358	2R
ASTEI00854	254.924	0.858745	0.476192	1.80336	0.071332	0.172793	2R
ASTEI00855	240.136	0.722633	0.364328	1.98347	0.047315	0.139999	2R
ASTEI00856	129.074	-0.276959	0.301924	-0.917314	0.358978	0.478112	2R
ASTEI00857	185.192	0.998746	0.550707	1.81357	0.0697438	0.170678	2R
ASTEI00858	459.202	0.864998	0.555098	1.55828	0.119167	0.231907	2R
ASTEI00859	1610.39	-0.468854	0.205298	-2.28377	0.0223851	0.0969745	2R
ASTEI00860	183.248	-0.565345	0.235738	-2.39819	0.0164764	0.0834055	2R
ASTEI00861	464.208	-0.467805	0.218798	-2.13807	0.0325108	0.115831	2R
ASTEI00862	93.3555	0.232713	0.321595	0.72362	0.469299	0.5819	2R
ASTEI00863	143.379	-0.541343	0.29186	-1.8548	0.0636245	0.162154	2R
ASTEI00864	397.884	-0.383349	0.169796	-2.25771	0.0239638	0.0999249	2R
ASTEI00865	243.761	-0.26767	0.176515	-1.51642	0.129414	0.243283	2R
ASTEI00866	5.23331	1.32664	0.824103	1.6098	0.107441	0.217944	2R
ASTEI00868	524.085	-0.51871	0.272025	-1.90685	0.0565404	0.152172	2R
ASTEI00869	56.0963	1.3108	0.833682	1.5723	0.115881	0.228134	2R
ASTEI00870	36.7406	0.318865	0.31379	1.01617	0.309548	0.432179	2R
ASTEI00871	2.2887	-0.272384	0.973248	-0.279871	0.779577	NA	2R
ASTEI00872	11.3874	0.830992	0.497736	1.66954	0.0950096	0.202454	2R
ASTEI00873	60.8065	0.689589	0.436271	1.58064	0.11396	0.225652	2R
ASTEI00874	741.741	0.0755116	0.16736	0.451194	0.65185	0.740408	2R
ASTEI00875	27.4099	-0.663307	0.421526	-1.57358	0.115584	0.227719	2R
ASTEI00876	78.318	-0.586167	0.327912	-1.78757	0.0738446	0.175997	2R
ASTEI00877	59.1803	-0.271051	0.28502	-0.95099	0.341609	0.461916	2R
ASTEI00878	6.6297	1.5813	0.937752	1.68626	0.0917452	0.198331	2R
ASTEI00879	54.774	-0.353961	0.356292	-0.993456	0.320488	0.442123	2R
ASTEI00880	284.931	-0.125236	0.159016	-0.787569	0.430949	0.547802	2R
ASTEI00881	963.737	0.361201	0.286047	1.26273	0.206685	0.327756	2R
ASTEI00882	414.19	0.355543	0.148147	2.39993	0.0163984	0.0833896	2R
ASTEI00883	475.684	-0.221348	0.155976	-1.41912	0.155865	0.273182	2R
ASTEI00884	112.134	-0.427302	0.230968	-1.85005	0.0643058	0.162756	2R
ASTEI00885	598.639	0.354845	0.270962	1.30958	0.19034	0.310655	2R
ASTEI00886	467.664	-0.459597	0.191861	-2.39547	0.0165991	0.0835739	2R
ASTEI00887	0.390762	1.80318	3.17293	0.568303	0.569829	NA	2R
ASTEI00888	675.268	-0.391004	0.186284	-2.09896	0.0358202	0.12126	2R
ASTEI00889	22.1055	-1.19405	0.402082	-2.96967	0.00298116	0.0356957	2R
ASTEI00890	249.586	-0.336064	0.15697	-2.14095	0.0322784	0.115421	2R
ASTEI00891	103.312	-0.45082	0.250115	-1.80245	0.0714749	0.173023	2R
ASTEI00892	0.160945	0.850401	4.40736	0.19295	0.846998	NA	2R
ASTEI00893	49.7024	-0.400441	0.35097	-1.14095	0.253889	0.376992	2R
ASTEI00895	174.84	-0.0900211	0.202609	-0.444309	0.656819	0.744683	2R
ASTEI00896	119.581	-0.321781	0.288678	-1.11467	0.264991	0.388316	2R
ASTEI00897	222.976	-0.427124	0.245339	-1.74096	0.0816907	0.186729	2R
ASTEI00898	2252.24	0.264911	0.196923	1.34525	0.178544	0.297743	2R
ASTEI00899	1437.71	-0.163771	0.155152	-1.05556	0.291171	0.413411	2R
ASTEI00900	797.173	-0.970385	0.295241	-3.28676	0.00101347	0.0188696	2R
ASTEI00901	534.979	-0.914498	0.225267	-4.05962	4.91517e-05	0.00263034	2R
ASTEI00902	153.046	-0.902851	0.258299	-3.49537	0.000473409	0.0120955	2R
ASTEI00903	35.3089	-0.946334	0.325031	-2.91152	0.00359675	0.0391799	2R
ASTEI00904	4.81998	-0.654144	1.04166	-0.627984	0.530014	0.636441	2R
ASTEI00905	481.266	-1.28133	0.38034	-3.3689	0.000754696	0.0160045	2R
ASTEI00906	298.236	-0.373277	0.246357	-1.51519	0.129725	0.243735	2R
ASTEI00907	1392.93	-0.446638	0.150779	-2.9622	0.00305453	0.0360837	2R
ASTEI00908	110.621	-1.17697	0.308317	-3.8174	0.000134867	0.00496925	2R
ASTEI00909	49.4339	0.481154	0.344017	1.39863	0.161923	0.280402	2R
ASTEI00910	36.6343	-0.112566	0.299967	-0.37526	0.707467	0.7859	2R
ASTEI00911	461.477	1.19854	0.584594	2.0502	0.0403448	0.12784	2R
ASTEI00912	63.4111	0.653954	0.370609	1.76454	0.077641	0.181812	2R
ASTEI00913	2320.64	0.254997	0.225361	1.1315	0.257844	0.381298	2R
ASTEI00914	186.703	-0.5856	0.183887	-3.18457	0.00144969	0.0227893	2R
ASTEI00915	166.196	-0.130641	0.180602	-0.723368	0.469454	0.581955	2R
ASTEI00916	189.453	-0.0659293	0.161473	-0.408298	0.683055	0.766239	2R
ASTEI00917	46.6982	-0.0573285	0.329157	-0.174167	0.861734	0.90301	2R
ASTEI00918	161.84	1.01576	0.514532	1.97415	0.0483648	0.141464	2R
ASTEI00919	307.687	-0.547299	0.22982	-2.38143	0.0172456	0.0853192	2R
ASTEI00920	501.666	1.07464	0.672274	1.59851	0.109929	0.220721	2R
ASTEI00921	6.17899	0.416586	0.809144	0.514848	0.606659	0.703149	2R
ASTEI00922	114.457	1.67651	0.650867	2.57581	0.0100006	0.0657174	2R
ASTEI00923	1954.39	-0.584856	0.231867	-2.52238	0.0116564	0.0711209	2R
ASTEI00924	576.27	-0.408886	0.200023	-2.04419	0.0409348	0.128815	2R
ASTEI00925	64.1005	0.17394	0.614665	0.282983	0.77719	0.842383	2R
ASTEI00926	76.7987	-0.229938	0.295786	-0.777378	0.436936	0.553043	2R
ASTEI00927	1133.39	-0.280144	0.166931	-1.6782	0.0933075	0.200332	2R
ASTEI00928	2.17436	2.75663	1.80626	1.52615	0.126973	NA	2R
ASTEI00929	329.525	1.68218	0.707219	2.37859	0.017379	0.08576	2R
ASTEI00930	145.227	1.89668	1.05264	1.80183	0.0715721	0.173135	2R
ASTEI00931	36.8506	1.90172	0.985835	1.92905	0.0537249	0.148699	2R
ASTEI00932	113.889	0.326223	0.186908	1.74537	0.0809204	0.18579	2R
ASTEI00933	205.032	1.35527	0.552092	2.45479	0.0140967	0.0779923	2R
ASTEI00934	117.064	-0.668815	0.282616	-2.36652	0.0179564	0.0871779	2R
ASTEI00935	59.4958	-0.177029	0.313894	-0.563976	0.57277	0.673987	2R
ASTEI00936	650.779	0.630139	0.43661	1.44325	0.148949	0.265146	2R
ASTEI00937	140.945	0.390572	0.397505	0.982559	0.325825	0.447253	2R
ASTEI00938	440.386	0.928415	0.48673	1.90745	0.0564618	0.152101	2R
ASTEI00939	150.536	1.33842	0.57223	2.33896	0.0193375	0.0901503	2R
ASTEI00940	16.4563	0.692716	0.526427	1.31588	0.188214	0.308047	2R
ASTEI00941	24.7112	-0.0757504	0.350452	-0.21615	0.82887	0.880701	2R
ASTEI00942	31.6146	-0.303218	0.334032	-0.90775	0.36401	0.483857	2R
ASTEI00943	132.639	-0.387359	0.253602	-1.52743	0.126654	0.239855	2R
ASTEI00944	142.564	-0.733516	0.258446	-2.83818	0.00453713	0.0443616	2R
ASTEI00945	128.645	0.389661	0.178058	2.1884	0.0286408	0.109173	2R
ASTEI00946	532.9	0.238358	0.269171	0.885524	0.375874	0.495425	2R
ASTEI00947	971.447	-0.507993	0.186901	-2.71799	0.00656806	0.0532596	2R
ASTEI00948	360.72	-0.638942	0.232421	-2.74907	0.00597647	0.0510416	2R
ASTEI00949	935.623	-0.246188	0.183547	-1.34128	0.17983	0.298993	2R
ASTEI00951	2.96787	1.01211	1.26981	0.797057	0.425418	NA	2R
ASTEI00952	212.768	1.06531	0.37666	2.82829	0.00467968	0.0450181	2R
ASTEI00953	97.4496	0.546031	0.274229	1.99115	0.0464644	0.138543	2R
ASTEI00954	82.0761	0.939624	0.461837	2.03454	0.0418976	0.130554	2R
ASTEI00955	16.3227	2.17345	0.839679	2.58843	0.00964149	0.0645697	2R
ASTEI00956	290.235	1.60557	0.58679	2.73619	0.00621551	0.0520103	2R
ASTEI00957	114.902	0.879045	0.510329	1.72251	0.0849778	0.190145	2R
ASTEI00958	220.134	1.07293	0.730221	1.46933	0.141745	0.256454	2R
ASTEI00959	242.916	-0.185911	0.224938	-0.8265	0.408521	0.526623	2R
ASTEI00960	302.118	0.832938	0.280996	2.96423	0.00303438	0.0360046	2R
ASTEI00961	205.424	0.189024	0.189798	0.99592	0.319289	0.441397	2R
ASTEI00962	98.5562	-0.281792	0.264934	-1.06363	0.287495	0.409965	2R
ASTEI00963	4.29681	1.42022	0.917287	1.54828	0.121555	0.234469	2R
ASTEI00964	18.9213	-0.430413	0.393567	-1.09362	0.27412	0.397149	2R
ASTEI00965	83.945	-0.2903	0.290363	-0.999784	0.317415	0.439559	2R
ASTEI00966	3.24597	-0.64246	0.87379	-0.735257	0.462183	NA	2R
ASTEI00967	306.386	0.618873	0.296248	2.08904	0.0367043	0.122515	2R
ASTEI00968	44.4608	1.34586	0.474291	2.83762	0.00454508	0.0443981	2R
ASTEI00969	589.131	-0.188871	0.135754	-1.39128	0.16414	0.28261	2R
ASTEI00970	447.949	-0.428757	0.23165	-1.85088	0.0641861	0.16261	2R
ASTEI00971	93.0968	-0.239148	0.222724	-1.07374	0.282939	0.40535	2R
ASTEI00972	224.953	-0.141153	0.183672	-0.768502	0.442189	0.558161	2R
ASTEI00973	719.7	0.00341115	0.271319	0.0125725	0.989969	0.992941	2R
ASTEI00974	104.955	1.33301	0.711416	1.87374	0.0609657	0.158662	2R
ASTEI00975	22.8014	1.38766	0.650353	2.1337	0.0328674	0.116484	2R
ASTEI00976	368.568	-0.554524	0.221467	-2.50387	0.0122843	0.0730037	2R
ASTEI00977	77.6288	-0.101603	0.366637	-0.277123	0.781686	0.845712	2R
ASTEI00978	258.514	0.983162	0.547185	1.79676	0.0723733	0.173991	2R
ASTEI00979	429.383	-0.722977	0.218557	-3.30796	0.000939773	0.0179483	2R
ASTEI00980	656.833	-0.0393182	0.116406	-0.337767	0.735539	0.809208	2R
ASTEI00981	361.745	-0.1215	0.159879	-0.75995	0.447284	0.562777	2R
ASTEI00982	188.88	0.0528497	0.211279	0.250142	0.802478	0.86111	2R
ASTEI00983	120.945	-0.465961	0.241287	-1.93115	0.0534644	0.148416	2R
ASTEI00984	534.768	1.16323	0.447608	2.59878	0.00935553	0.0637938	2R
ASTEI00985	197.677	-0.697794	0.241249	-2.89242	0.00382282	0.0403857	2R
ASTEI00986	555.413	1.02391	0.413486	2.47629	0.0132755	0.075559	2R
ASTEI00987	167.816	0.304295	0.190648	1.59611	0.110464	0.221498	2R
ASTEI00989	754.212	0.231551	0.124401	1.86132	0.0626985	0.160981	X
ASTEI00990	9.80875	0.887654	0.653784	1.35772	0.174553	0.293278	X
ASTEI00991	8.09668	0.0812457	0.590785	0.137522	0.890618	0.92488	X
ASTEI00992	451.027	0.018463	0.195777	0.094306	0.924866	0.9488	X
ASTEI00993	215.83	0.00625378	0.165998	0.0376738	0.969948	0.978897	X
ASTEI00994	368.255	1.44813	0.442231	3.27461	0.00105807	0.0194926	X
ASTEI00995	769.249	-0.159427	0.175714	-0.90731	0.364243	0.484044	X
ASTEI00996	636.505	0.734698	0.134334	5.46917	4.52158e-08	9.69002e-06	X
ASTEI00997	174.224	0.442776	0.222721	1.98803	0.0468081	0.139158	X
ASTEI00998	164.877	0.0248467	0.174857	0.142097	0.887003	0.922311	X
ASTEI00999	258.083	-0.349002	0.227524	-1.53391	0.125051	0.237978	X
ASTEI01000	82.7396	-0.0417259	0.275432	-0.151493	0.879587	0.916527	X
ASTEI01001	389.686	-0.246076	0.248138	-0.99169	0.321349	0.442708	X
ASTEI01002	325.873	0.549985	0.263493	2.08728	0.0368626	0.122615	X
ASTEI01003	66.51	0.767182	0.349678	2.19397	0.0282378	0.1083	X
ASTEI01004	421.603	0.701772	0.289283	2.4259	0.0152704	0.0807425	X
ASTEI01005	114.093	1.40035	0.592186	2.36472	0.0180439	0.087335	X
ASTEI01006	773.507	0.112733	0.234899	0.479922	0.631283	0.72499	X
ASTEI01007	873.823	0.757137	0.231716	3.26752	0.00108496	0.0196895	X
ASTEI01008	102.347	1.5193	0.461418	3.29267	0.000992392	0.0187093	X
ASTEI01009	252.389	1.58306	0.432595	3.65946	0.000252751	0.00782931	X
ASTEI01010	1023.41	0.0505807	0.147342	0.343288	0.731382	0.806155	X
ASTEI01011	141.857	2.16014	0.549	3.93468	8.33088e-05	0.00360724	X
ASTEI01012	490.737	1.98573	0.703871	2.82116	0.00478505	0.0455685	X
ASTEI01013	84.7873	1.51737	0.737932	2.05625	0.0397585	0.127126	X
ASTEI01014	213.066	1.41753	0.354221	4.00183	6.2855e-05	0.00305574	X
ASTEI01015	507.843	0.181449	0.156484	1.15954	0.246237	0.369128	X
ASTEI01016	171.485	0.0066204	0.263754	0.0251007	0.979975	0.986078	X
ASTEI01017	127.324	0.93782	0.329087	2.84977	0.00437512	0.0434474	X
ASTEI01018	116.913	2.13564	1.12045	1.90606	0.0566424	0.152286	X
ASTEI01019	27.3044	1.80272	0.661539	2.72504	0.0064294	0.0529115	X
ASTEI01020	273.322	0.997944	0.311548	3.20318	0.00135918	0.0219376	X
ASTEI01021	337.269	2.28238	0.781205	2.92161	0.00348228	0.0384746	X
ASTEI01022	704.006	0.7661	0.22124	3.46276	0.000534674	0.0129369	X
ASTEI01023	177.266	0.550618	0.18302	3.00852	0.00262522	0.0332137	X
ASTEI01024	316.196	1.45001	0.404949	3.58071	0.000342657	0.00977783	X
ASTEI01025	23.5058	0.835317	0.381595	2.18902	0.0285956	0.109114	X
ASTEI01026	303.757	0.168241	0.195898	0.85882	0.39044	0.509808	X
ASTEI01027	209.71	2.02416	0.742485	2.72619	0.00640692	0.0527679	X
ASTEI01028	30.1724	1.81192	0.570333	3.17695	0.0014883	0.0231828	X
ASTEI01029	67.3883	1.01531	0.444921	2.28201	0.0224888	0.0971431	X
ASTEI01030	246.526	0.00499095	0.2587	0.0192924	0.984608	0.989486	X
ASTEI01031	166.149	-0.250815	0.215487	-1.16395	0.244446	0.367702	X
ASTEI01032	273.864	-0.335664	0.291639	-1.15096	0.24975	0.372491	X
ASTEI01033	1787.23	-0.0352522	0.130774	-0.269566	0.787494	0.850309	X
ASTEI01034	129.062	0.957796	0.377881	2.53465	0.011256	0.0696927	X
ASTEI01035	642.569	1.14873	0.208148	5.51879	3.41332e-08	7.46736e-06	X
ASTEI01036	165.337	0.776191	0.201697	3.84829	0.000118944	0.00454396	X
ASTEI01037	236.554	-0.208592	0.231302	-0.901815	0.367155	0.486867	X
ASTEI01038	23.7539	-0.281311	0.366675	-0.767195	0.442966	0.558749	X
ASTEI01039	13.6307	0.323629	0.537416	0.602196	0.547044	0.650936	X
ASTEI01040	354.44	0.46395	0.203832	2.27614	0.0228375	0.0978443	X
ASTEI01041	139.61	0.841488	0.223715	3.76143	0.000168948	0.00574148	X
ASTEI01042	214.086	0.649008	0.252676	2.56854	0.0102128	0.0662713	X
ASTEI01043	0.936527	0.415852	1.72061	0.241689	0.809021	NA	X
ASTEI01044	53.8568	1.0249	0.337604	3.03579	0.00239906	0.0315504	X
ASTEI01045	631.304	0.208077	0.131129	1.58681	0.112556	0.224024	X
ASTEI01046	177.966	1.56601	0.414472	3.77833	0.000157887	0.00556843	X
ASTEI01047	544.341	2.02045	0.681523	2.96461	0.00303063	0.0360007	X
ASTEI01048	277.102	0.446859	0.172445	2.59131	0.00956121	0.06447	X
ASTEI01049	455.906	0.886796	0.322267	2.75174	0.00592794	0.0509266	X
ASTEI01050	99.434	1.27531	0.471455	2.70504	0.00682953	0.0543399	X
ASTEI01051	0.723263	-0.0318493	2.03541	-0.0156476	0.987516	NA	X
ASTEI01052	0.482006	3.05622	2.72861	1.12007	0.262686	NA	X
ASTEI01054	32.1756	0.737861	0.409368	1.80244	0.0714763	0.173023	X
ASTEI01055	6.454	0.133915	0.704415	0.190108	0.849225	0.894185	X
ASTEI01056	7.29411	0.0350901	0.707622	0.0495887	0.96045	0.972302	X
ASTEI01057	461.256	0.685017	0.238463	2.87263	0.00407071	0.0418609	X
ASTEI01058	41.2203	0.229453	0.297158	0.772157	0.440022	0.555857	X
ASTEI01059	420.684	-0.249087	0.216061	-1.15285	0.248971	0.371898	X
ASTEI01060	406.994	-0.0663189	0.179631	-0.369195	0.711982	0.789412	X
ASTEI01061	139.083	0.329935	0.20362	1.62035	0.105158	0.21467	X
ASTEI01062	441.155	0.66455	0.240892	2.75871	0.00580302	0.0501959	X
ASTEI01063	259.424	0.455095	0.167227	2.72141	0.00650034	0.0530494	X
ASTEI01064	137.879	0.505018	0.206655	2.44378	0.0145344	0.078865	X
ASTEI01065	791.705	0.290211	0.119065	2.43743	0.0147923	0.079414	X
ASTEI01066	315.144	0.366892	0.171395	2.14063	0.0323038	0.115421	X
ASTEI01067	350.026	0.0417726	0.188815	0.221235	0.824909	0.877914	X
ASTEI01068	159.611	0.413953	0.20113	2.05814	0.0395768	0.126821	X
ASTEI01069	66.8883	1.06923	0.482731	2.21497	0.0267625	0.105808	X
ASTEI01070	1032.53	1.01085	0.123642	8.17565	2.94282e-16	4.41465e-13	X
ASTEI01071	4.13931	2.43158	1.07804	2.25556	0.0240982	0.10021	X
ASTEI01072	649.584	-0.34809	0.191534	-1.81738	0.0691589	0.169864	X
ASTEI01074	734.685	0.96872	0.215447	4.49633	6.91379e-06	0.000610098	X
ASTEI01075	197.391	-0.682465	0.215788	-3.16267	0.00156331	0.0238959	X
ASTEI01076	322.446	-0.334662	0.187925	-1.78083	0.0749407	0.177641	X
ASTEI01077	508.227	0.562291	0.251412	2.23654	0.0253167	0.102685	X
ASTEI01078	66.2968	0.942705	0.477107	1.97588	0.0481686	0.14129	X
ASTEI01079	46.8623	1.95794	0.619438	3.16084	0.00157316	0.0239417	X
ASTEI01080	230.402	1.64917	0.521003	3.16538	0.0015488	0.0237777	X
ASTEI01082	88.3853	1.36319	0.242496	5.62152	1.8928e-08	4.51733e-06	X
ASTEI01083	245.629	0.206776	0.184607	1.12009	0.262677	0.385625	X
ASTEI01084	730.114	1.89292	0.562774	3.36355	0.000769461	0.0160638	X
ASTEI01085	221.496	1.12288	0.391133	2.87085	0.0040937	0.0419804	X
ASTEI01086	27.9048	1.31684	0.434617	3.02989	0.00244643	0.0319667	X
ASTEI01087	2.79339	1.85675	1.09065	1.70242	0.0886772	NA	X
ASTEI01088	40.0443	2.06608	0.605804	3.41047	0.000648501	0.0145511	X
ASTEI01089	1.20109	2.14779	1.57729	1.3617	0.173292	NA	X
ASTEI01090	131.664	1.26972	0.40878	3.10612	0.00189558	0.0270454	X
ASTEI01091	164.627	1.57533	0.4842	3.25346	0.00114007	0.0201886	X
ASTEI01092	28.8159	1.04966	0.452545	2.31946	0.0203702	0.0928419	X
ASTEI01093	19.4234	1.37049	0.428088	3.20141	0.00136755	0.0219918	X
ASTEI01094	152.172	1.93528	0.72251	2.67855	0.0073942	0.056103	X
ASTEI01095	104.529	1.16796	0.418941	2.78789	0.00530533	0.0481931	X
ASTEI01096	78.8609	0.989411	0.441102	2.24304	0.0248939	0.101788	X
ASTEI01097	87.8628	1.11115	0.40831	2.72134	0.00650172	0.0530494	X
ASTEI01098	25.733	0.908811	0.354279	2.56524	0.0103104	0.0667097	X
ASTEI01099	177.822	1.22759	0.202199	6.07119	1.26965e-09	4.16644e-07	X
ASTEI01100	476.568	1.55705	0.643951	2.41796	0.0156079	0.081384	X
ASTEI01101	258.472	1.64774	0.534102	3.08507	0.00203503	0.0282218	X
ASTEI01102	468.23	0.54915	0.175072	3.13672	0.00170849	0.0252463	X
ASTEI01103	97.1921	-0.234695	0.280016	-0.838148	0.401947	0.520386	X
ASTEI01104	289.369	0.0628132	0.176429	0.356026	0.721821	0.798265	X
ASTEI01105	274.042	0.0835097	0.193097	0.432476	0.665395	0.751486	X
ASTEI01106	62.8973	-0.596218	0.316565	-1.8834	0.059646	0.15686	X
ASTEI01107	341.868	1.33464	0.183948	7.25554	4.00076e-13	4.668e-10	X
ASTEI01108	158.804	0.719883	0.200001	3.59939	0.000318968	0.00922723	X
ASTEI01109	55.1036	0.414017	0.284042	1.45759	0.144953	0.260153	X
ASTEI01110	175.989	0.0683104	0.174586	0.391271	0.695597	0.775668	X
ASTEI01111	158.09	1.3796	0.284513	4.84898	1.24098e-06	0.000164956	X
ASTEI01112	129.22	-0.210099	0.252003	-0.833718	0.40444	0.522844	X
ASTEI01113	6.80389	0.125581	0.742794	0.169066	0.865745	0.906219	X
ASTEI01114	104.711	-0.0847906	0.178288	-0.475583	0.634372	0.72753	X
ASTEI01115	180.119	0.485982	0.189198	2.56864	0.0102099	0.0662713	X
ASTEI01116	840.177	0.318133	0.12468	2.5516	0.0107229	0.0680628	X
ASTEI01117	91.5922	0.762075	0.288491	2.64159	0.00825178	0.0596366	X
ASTEI01118	4.97952	2.46517	0.882782	2.7925	0.00523018	0.0476341	X
ASTEI01119	10.5836	1.34551	0.542232	2.48142	0.0130858	0.0750899	X
ASTEI01120	46.5753	1.98474	0.41351	4.79973	1.58878e-06	0.000201009	X
ASTEI01121	40.7858	2.83278	0.446206	6.34859	2.17296e-10	9.5076e-08	X
ASTEI01122	292.692	1.52663	0.461513	3.30788	0.000940061	0.0179483	X
ASTEI01123	760.483	1.75557	0.368776	4.76052	1.93096e-06	0.000237572	X
ASTEI01124	47.5374	2.42975	0.513712	4.7298	2.24745e-06	0.000256595	X
ASTEI01125	1560.48	0.0824171	0.130235	0.632836	0.526841	0.6335	X
ASTEI01126	15.4686	0.500401	0.462228	1.08258	0.278993	0.401807	X
ASTEI01127	463.954	1.14236	0.458625	2.49084	0.0127443	0.0741637	X
ASTEI01128	151.489	0.848089	0.213438	3.97347	7.08322e-05	0.00324061	X
ASTEI01129	72.5234	0.194043	0.27238	0.712397	0.476219	0.588119	X
ASTEI01130	63.9796	1.76205	0.57765	3.05038	0.00228554	0.0305739	X
ASTEI01131	1.9722	4.1947	1.55966	2.68949	0.00715607	NA	X
ASTEI01132	257.921	1.20321	0.396766	3.03255	0.00242499	0.0317913	X
ASTEI01133	5.68134	1.24229	0.766196	1.62137	0.104938	0.214389	X
ASTEI01134	40.8521	2.88109	0.417545	6.90008	5.19722e-12	3.31304e-09	X
ASTEI01135	792.06	-0.11928	0.174845	-0.682201	0.495112	0.604695	X
ASTEI01136	539.427	1.83939	0.51063	3.60219	0.000315552	0.00922058	X
ASTEI01137	201.247	-0.150498	0.268231	-0.561076	0.574746	0.67563	X
ASTEI01138	132.047	-0.122122	0.265866	-0.459336	0.645993	0.736704	X
ASTEI01139	1550.61	-0.168556	0.160906	-1.04754	0.29485	0.417217	X
ASTEI01140	1184.45	-0.175754	0.163266	-1.07649	0.281708	0.404515	X
ASTEI01141	446.692	0.367452	0.122569	2.99792	0.00271831	0.0340452	X
ASTEI01142	555.125	0.656457	0.14347	4.57556	4.74951e-06	0.000474996	X
ASTEI01143	37.8234	0.990469	0.298562	3.31746	0.000908397	0.0177671	X
ASTEI01144	210.704	0.9539	0.434676	2.19451	0.0281987	0.108299	X
ASTEI01145	38.918	0.300123	0.413805	0.725275	0.468283	0.581057	X
ASTEI01146	400.425	1.76895	0.625291	2.82901	0.00466926	0.0450181	X
ASTEI01147	207.605	1.91965	0.545025	3.52213	0.000428094	0.0114387	X
ASTEI01148	82.0171	0.239749	0.252451	0.949686	0.342272	0.462311	X
ASTEI01149	898.294	0.254094	0.119645	2.12374	0.0336921	0.117855	X
ASTEI01150	172.37	0.190817	0.151353	1.26074	0.207402	0.3281	X
ASTEI01151	57.7872	1.4534	0.515902	2.8172	0.00484447	0.0456903	X
ASTEI01152	7.04565	1.53172	0.775833	1.97429	0.0483487	0.141464	X
ASTEI01153	27.8834	0.986198	0.614568	1.6047	0.108559	0.219031	X
ASTEI01154	84.3534	1.2011	0.311513	3.85568	0.000115409	0.00445555	X
ASTEI01155	238.016	1.16123	0.530637	2.18838	0.0286422	0.109173	X
ASTEI01156	16.6265	1.59797	0.599146	2.66707	0.00765149	0.0571743	X
ASTEI01157	241.942	1.31648	0.397502	3.31189	0.000926693	0.0178883	X
ASTEI01158	328.559	0.824106	0.126531	6.51308	7.36262e-11	4.0692e-08	X
ASTEI01159	102.887	0.0379935	0.399757	0.0950414	0.924282	0.948489	X
ASTEI01160	88.9284	0.173742	0.277604	0.625863	0.531405	0.63782	X
ASTEI01161	292.746	-0.0894159	0.206435	-0.433143	0.664911	0.751181	X
ASTEI01162	596.525	1.41119	0.463672	3.04351	0.00233836	0.0310039	X
ASTEI01163	145.485	1.27905	0.33594	3.80738	0.000140448	0.00508568	X
ASTEI01164	64.6512	1.44775	0.482952	2.99772	0.00272012	0.0340452	X
ASTEI01165	854.725	-0.967477	0.300862	-3.21568	0.00130134	0.0214371	X
ASTEI01166	31.4321	1.78716	0.482278	3.70566	0.00021084	0.00681242	X
ASTEI01167	214.289	-0.489238	0.262427	-1.86428	0.0622821	0.160443	X
ASTEI01168	620.369	-0.13824	0.1799	-0.768427	0.442234	0.558161	X
ASTEI01169	329.272	0.675558	0.141185	4.7849	1.7107e-06	0.000213858	X
ASTEI011690	0.168967	-0.111386	4.40736	-0.0252727	0.979837	NA	X
ASTEI01170	31.4259	1.52284	0.729482	2.08756	0.0368375	0.122612	X
ASTEI01171	69.8794	-1.26985	0.429209	-2.95858	0.00309055	0.0361402	X
ASTEI01172	23.2973	3.2469	0.531103	6.11351	9.74638e-10	3.41156e-07	X
ASTEI01173	2.07522	2.00367	1.10081	1.82017	0.0687326	NA	X
ASTEI01174	12.2213	0.579028	0.447816	1.293	0.19601	0.317129	X
ASTEI01176	7.82736	1.39191	0.647167	2.15078	0.0314936	0.113882	X
ASTEI01177	0.597649	1.77863	2.06357	0.86192	0.388732	NA	X
ASTEI01178	123.505	0.885053	0.296799	2.982	0.00286372	0.0348459	X
ASTEI01179	403.953	-0.0151107	0.190744	-0.0792199	0.936858	0.956905	X
ASTEI01180	1019.83	-0.179245	0.194466	-0.921732	0.356668	0.475724	X
ASTEI01181	224.928	0.421147	0.169085	2.49074	0.0127479	0.0741637	X
ASTEI01182	293.673	1.54925	0.587423	2.63737	0.00835522	0.0600535	X
ASTEI01183	35.6599	1.65569	0.540333	3.0642	0.00218252	0.0295725	X
ASTEI01184	1049.9	1.14169	0.483285	2.36234	0.0181598	0.0875292	X
ASTEI01185	779.739	1.24656	0.123275	10.1121	4.88359e-24	5.12826e-20	X
ASTEI01186	5.99157	1.28234	0.739076	1.73506	0.0827304	0.187589	X
ASTEI01188	21.536	0.308832	0.397119	0.777682	0.436757	0.552909	X
ASTEI01189	129.999	1.30914	0.578618	2.26253	0.0236648	0.0994813	X
ASTEI01190	107.442	1.00151	0.476863	2.10021	0.0357102	0.121122	X
ASTEI01191	0.154889	-0.111339	4.40736	-0.0252621	0.979846	NA	X
ASTEI01192	492.392	2.32427	0.774087	3.0026	0.00267686	0.0337451	X
ASTEI01193	355	1.49888	0.485562	3.08689	0.00202264	0.0280949	X
ASTEI01194	284.744	1.30695	0.427974	3.0538	0.00225966	0.0303824	X
ASTEI01195	375.278	1.63029	0.401677	4.05871	4.93455e-05	0.00263034	X
ASTEI01196	143.057	0.546299	0.19191	2.84664	0.0044183	0.0435649	X
ASTEI01197	75.2243	0.983024	0.479421	2.05044	0.0403216	0.127805	X
ASTEI01198	1387.46	0.494441	0.185816	2.66092	0.00779273	0.0577922	X
ASTEI01199	335.423	1.00092	0.339514	2.94809	0.00319739	0.0368328	X
ASTEI01200	236.563	1.60475	0.57879	2.7726	0.0055611	0.0493636	X
ASTEI01201	42.4732	-0.404692	0.342555	-1.18139	0.237447	0.36001	X
ASTEI01202	40.8821	0.802036	0.302771	2.64898	0.00807349	0.0589471	X
ASTEI01203	148.621	1.68663	0.564123	2.98982	0.00279139	0.0345326	X
ASTEI01204	93.7684	0.378859	0.277825	1.36366	0.172674	0.291286	X
ASTEI01205	412.676	0.260067	0.153932	1.68949	0.0911251	0.197426	X
ASTEI01206	262.128	0.198055	0.190226	1.04116	0.297803	0.420613	X
ASTEI01207	171.449	-0.0523192	0.278662	-0.187752	0.851071	0.89541	X
ASTEI01208	109.33	1.86182	0.257477	7.23102	4.79375e-13	5.03392e-10	X
ASTEI01209	201.792	0.4612	0.201531	2.28848	0.0221097	0.0964577	X
ASTEI01210	326.168	-0.0570283	0.151088	-0.377451	0.705839	0.784423	X
ASTEI01211	659.386	-0.125099	0.165551	-0.755652	0.449858	0.564755	X
ASTEI01212	124.52	-0.177192	0.24756	-0.715752	0.474144	0.586246	X
ASTEI01213	296.034	0.962138	0.202739	4.7457	2.07791e-06	0.000247956	X
ASTEI01214	273.884	1.4083	0.481015	2.92776	0.00341418	0.038222	X
ASTEI01215	53.0143	1.67383	0.503938	3.32149	0.00089538	0.0176459	X
ASTEI01216	192.863	0.718581	0.221456	3.2448	0.00117532	0.0204919	X
ASTEI01217	140.187	-0.121637	0.246028	-0.494403	0.621021	0.716238	X
ASTEI01218	146.846	0.395541	0.207308	1.90799	0.0563925	0.152101	X
ASTEI01219	570.352	0.699454	0.236254	2.9606	0.00307043	0.0360837	X
ASTEI01220	470.533	0.291601	0.149974	1.94434	0.0518542	0.146023	X
ASTEI01221	96.9803	0.882144	0.366413	2.40751	0.0160617	0.0825074	X
ASTEI01222	4.521	2.2324	1.09143	2.04539	0.0408162	0.128519	X
ASTEI01223	140.716	1.58313	0.48892	3.23801	0.00120366	0.0206457	X
ASTEI01224	1.84146	2.77231	1.81726	1.52554	0.127124	NA	X
ASTEI01225	10.6095	1.8621	0.947972	1.9643	0.0494953	0.143064	X
ASTEI01226	930.987	1.84776	0.721717	2.56023	0.0104604	0.0672657	X
ASTEI01227	54.6321	1.82746	0.674532	2.70923	0.00674403	0.0539782	X
ASTEI01228	292.789	0.836471	0.233254	3.5861	0.000335661	0.00960428	X
ASTEI01229	20.1366	1.0508	0.691819	1.51889	0.128791	0.242763	X
ASTEI01230	309.461	1.43752	0.531433	2.70499	0.00683065	0.0543399	X
ASTEI01231	1374.64	0.0113625	0.157514	0.0721363	0.942493	0.960351	X
ASTEI01232	82.5945	0.246495	0.239698	1.02836	0.303781	0.4267	X
ASTEI01233	735.382	-0.110964	0.154347	-0.718922	0.472189	0.584517	X
ASTEI01234	682.258	0.929291	0.271924	3.41747	0.000632061	0.0144289	X
ASTEI01235	81.4951	1.75166	0.682008	2.56838	0.0102174	0.0662713	X
ASTEI01236	443.698	1.9763	1.04167	1.89723	0.057797	0.154003	X
ASTEI01237	894.344	1.64676	0.490227	3.35918	0.000781754	0.0161281	X
ASTEI01238	372.786	1.68483	0.574489	2.93274	0.00335986	0.0379364	X
ASTEI01239	81.9141	1.57564	0.334936	4.70431	2.54731e-06	0.000285072	X
ASTEI01240	767.526	1.03894	0.344659	3.01442	0.00257474	0.0329322	X
ASTEI01242	414.066	1.97717	0.76317	2.59073	0.00957726	0.06447	X
ASTEI01243	5.30811	1.24449	0.806689	1.54271	0.122902	0.236318	X
ASTEI01244	596.419	0.738897	0.131793	5.60649	2.06475e-08	4.81821e-06	X
ASTEI01245	210.931	1.13065	0.294861	3.83452	0.00012581	0.00475226	X
ASTEI01246	109.053	1.82278	0.734055	2.48316	0.0130222	0.0750115	X
ASTEI01247	258.827	2.15355	0.796259	2.70459	0.00683891	0.0543644	X
ASTEI01248	475.325	1.91831	0.683064	2.80839	0.00497901	0.0463487	X
ASTEI01249	1053.64	0.242308	0.132298	1.83153	0.0670219	0.166777	X
ASTEI01250	13.3989	2.06512	0.65177	3.16848	0.0015324	0.0235949	X
ASTEI01251	14.2663	2.64806	0.745064	3.55413	0.000379227	0.0105951	X
ASTEI01252	17.2829	2.17507	0.70193	3.0987	0.00194374	0.0274714	X
ASTEI01253	13.2121	1.75113	0.712097	2.45912	0.0139277	0.0774655	X
ASTEI01254	40.8549	1.81068	0.613518	2.95132	0.00316424	0.036797	X
ASTEI01255	136.693	-0.791969	0.271205	-2.92019	0.0034982	0.0384746	X
ASTEI01256	1265.93	0.917498	0.237515	3.86291	0.000112045	0.00437393	X
ASTEI01257	17.1857	-2.01835	0.512316	-3.93965	8.15997e-05	0.00357033	3L
ASTEI01258	1.64297	0.598051	1.39486	0.428754	0.668102	NA	3L
ASTEI01259	11.2306	2.32661	0.863747	2.69363	0.00706793	0.0552741	3L
ASTEI01260	7.58286	-0.332984	0.923165	-0.360699	0.718325	0.795102	3L
ASTEI01261	5.74257	0.880129	1.01781	0.864729	0.387187	0.506491	3L
ASTEI01262	60.9817	1.05357	0.445373	2.36558	0.0180018	0.0872872	3L
ASTEI01263	489.149	1.24196	0.584639	2.12433	0.033643	0.117762	3L
ASTEI01264	8.00132	1.36521	0.60247	2.26601	0.0234506	0.0989656	3L
ASTEI01265	476.967	-0.385543	0.230861	-1.67003	0.0949144	0.202449	3L
ASTEI01266	131.183	0.282723	0.426976	0.662152	0.507874	0.616268	3L
ASTEI01267	131.566	-0.108771	0.229461	-0.474026	0.635482	0.728356	3L
ASTEI01268	777.921	-0.256396	0.183242	-1.39922	0.161746	0.280233	3L
ASTEI01269	1404.64	0.106039	0.105065	1.00927	0.312846	0.435414	3L
ASTEI01270	672.901	-0.336689	0.211603	-1.59113	0.11158	0.222884	3L
ASTEI01271	81.6218	-0.632419	0.271656	-2.32801	0.0199114	0.0915857	3L
ASTEI01272	574.961	-0.375516	0.193099	-1.94469	0.0518126	0.146	3L
ASTEI01273	369.37	0.470496	0.361814	1.30038	0.193471	0.314058	3L
ASTEI01274	1034.52	0.524063	0.379601	1.38056	0.167414	0.285623	3L
ASTEI01275	1.1909	2.72562	1.82827	1.49082	0.136008	NA	3L
ASTEI01276	437.987	0.120477	0.195917	0.614942	0.538593	0.644018	3L
ASTEI01277	120.899	-0.3675	0.225433	-1.6302	0.10306	0.212328	3L
ASTEI01278	186.854	-0.21998	0.209558	-1.04974	0.29384	0.416412	3L
ASTEI01279	81.0889	0.7126	0.423629	1.68213	0.092543	0.199261	3L
ASTEI01280	254.132	0.328113	0.189793	1.72879	0.0838461	0.189023	3L
ASTEI01281	4.75647	1.29078	0.905397	1.42565	0.153971	0.270919	3L
ASTEI01282	891.058	-0.307512	0.144011	-2.13533	0.0327337	0.116217	3L
ASTEI01283	749.4	0.426795	0.164723	2.59099	0.00957014	0.06447	3L
ASTEI01284	74.0947	-1.04503	0.243177	-4.29742	1.72799e-05	0.00126893	3L
ASTEI012841	178.141	0.245468	0.2199	1.11627	0.264305	0.387581	3L
ASTEI01285	76.7087	-0.719861	0.272673	-2.64002	0.00829017	0.0598339	3L
ASTEI01286	242.709	-0.393754	0.27909	-1.41085	0.158288	0.276202	3L
ASTEI01287	143.265	0.453475	0.17925	2.52984	0.0114115	0.0703072	3L
ASTEI01288	65.4682	-0.303326	0.259315	-1.16972	0.242113	0.365134	3L
ASTEI01289	95.0395	-1.13989	0.277799	-4.10329	4.07319e-05	0.00227514	3L
ASTEI01290	106.839	-1.28656	0.280763	-4.58236	4.59765e-06	0.00046423	3L
ASTEI01291	1.07224	-0.0103275	1.6391	-0.00630074	0.994973	NA	3L
ASTEI01292	23.8975	0.663229	0.38994	1.70085	0.0889717	0.195178	3L
ASTEI01294	21.2214	0.11546	0.512621	0.225234	0.821797	0.875199	3L
ASTEI01295	93.955	1.25695	0.424462	2.96128	0.00306367	0.0360837	3L
ASTEI01296	455.771	0.533046	0.363411	1.46679	0.142434	0.257145	3L
ASTEI01297	649.803	0.532442	0.333867	1.59477	0.110763	0.221886	3L
ASTEI01298	211.071	1.0146	0.42891	2.36553	0.0180044	0.0872872	3L
ASTEI01299	110.897	1.11539	0.483547	2.30669	0.0210722	0.0945636	3L
ASTEI01300	1.08111	1.77998	1.7311	1.02824	0.303838	NA	3L
ASTEI01301	0.900418	-2.00111	1.72544	-1.15977	0.246142	NA	3L
ASTEI01302	637.795	-0.301466	0.18463	-1.63281	0.102508	0.211668	3L
ASTEI01303	23.041	1.29481	0.599573	2.15956	0.0308069	0.11264	3L
ASTEI01304	180.629	-0.0106827	0.183505	-0.058215	0.953577	0.967583	3L
ASTEI01305	64.1569	-0.160085	0.27741	-0.57707	0.563892	0.665665	3L
ASTEI01306	358.941	1.2551	0.732077	1.71444	0.0864478	0.192125	3L
ASTEI01307	618.62	0.972936	0.584818	1.66366	0.0961814	0.203794	3L
ASTEI01308	129.286	-0.173253	0.427118	-0.405633	0.685012	0.767614	3L
ASTEI01309	278.078	-0.584504	0.309828	-1.88655	0.0592214	0.156249	3L
ASTEI01310	274.113	0.296745	0.27256	1.08873	0.276272	0.399275	3L
ASTEI01311	592.347	0.0501708	0.246788	0.203295	0.838904	0.887304	3L
ASTEI01312	436.644	0.733429	0.598641	1.22516	0.220516	0.342726	3L
ASTEI01313	134.312	0.812383	0.7445	1.09118	0.275194	0.398375	3L
ASTEI01314	61.827	0.982464	0.83363	1.17854	0.238582	0.361021	3L
ASTEI01315	7.65771	-1.23037	0.70703	-1.7402	0.081824	0.186912	3L
ASTEI01316	895.277	-0.510138	0.18554	-2.74947	0.00596909	0.0510416	3L
ASTEI01317	42.6474	0.515221	0.737746	0.698372	0.484944	0.595742	3L
ASTEI01318	870.531	0.0332628	0.164739	0.201912	0.839986	0.888075	3L
ASTEI01319	216.718	0.0689766	0.19372	0.356063	0.721793	0.798265	3L
ASTEI01320	173.036	-0.543356	0.261299	-2.07944	0.0375768	0.123531	3L
ASTEI01321	194.858	-0.107847	0.142208	-0.758371	0.448229	0.563762	3L
ASTEI01322	29.6041	-0.628869	0.460379	-1.36598	0.171945	0.290808	3L
ASTEI01323	1636.68	-0.0251704	0.263201	-0.0956319	0.923813	0.948285	3L
ASTEI01324	171.044	-0.276261	0.316355	-0.873264	0.382519	0.501728	3L
ASTEI01325	24.6682	-0.116946	0.497396	-0.235117	0.814118	0.869602	3L
ASTEI01326	0.573179	-0.721708	2.10809	-0.342351	0.732087	NA	3L
ASTEI01327	14.5594	-0.440615	0.565817	-0.778724	0.436142	0.552531	3L
ASTEI01328	232.121	-0.961612	0.274064	-3.50871	0.000450283	0.0117916	3L
ASTEI01329	98.2359	-0.792694	0.276199	-2.87001	0.00410459	0.0420511	3L
ASTEI01330	182.951	0.991263	0.528908	1.87417	0.0609074	0.158589	3L
ASTEI01331	276.483	-0.415268	0.200003	-2.07631	0.0378656	0.123952	3L
ASTEI01332	330.755	0.246895	0.162407	1.52022	0.128455	0.242304	3L
ASTEI01333	250.189	-0.556735	0.292823	-1.90127	0.0572668	0.153213	3L
ASTEI01334	76.7797	-0.369437	0.231007	-1.59925	0.109766	0.220554	3L
ASTEI01335	212.01	0.792896	0.326285	2.43008	0.0150957	0.0801414	3L
ASTEI01336	626.779	-0.326644	0.189134	-1.72705	0.0841584	0.189361	3L
ASTEI01337	401.617	-0.195007	0.143071	-1.36301	0.17288	0.291446	3L
ASTEI01338	817.861	-0.219217	0.198281	-1.10559	0.268905	0.392082	3L
ASTEI01339	124.048	-0.924275	0.236436	-3.90919	9.26049e-05	0.00384365	3L
ASTEI01340	262.263	-0.140897	0.212775	-0.662186	0.507852	0.616268	3L
ASTEI01341	378.225	-0.364708	0.206837	-1.76326	0.0778564	0.182168	3L
ASTEI01342	170.485	-0.612111	0.210992	-2.90111	0.00371845	0.0397634	3L
ASTEI01343	1129.2	0.79758	0.533655	1.49456	0.135029	0.249549	3L
ASTEI01344	209.08	0.053237	0.26876	0.198084	0.842979	0.889678	3L
ASTEI01345	235.688	-0.362644	0.163062	-2.22396	0.0261508	0.104494	3L
ASTEI01346	17.4544	-0.135816	0.412258	-0.329445	0.741819	0.814496	3L
ASTEI01347	382.184	-0.390706	0.221997	-1.75996	0.0784145	0.182871	3L
ASTEI01348	84.2583	-0.453322	0.271278	-1.67106	0.0947095	0.202216	3L
ASTEI01349	874.225	-0.0477793	0.102791	-0.46482	0.64206	0.733643	3L
ASTEI01350	333.336	-0.347929	0.21344	-1.6301	0.103081	0.212328	3L
ASTEI01351	280.231	-0.0388065	0.206603	-0.187832	0.851009	0.89541	3L
ASTEI01352	753.625	0.583621	0.338353	1.72489	0.0845477	0.189817	3L
ASTEI01353	510.701	-0.394134	0.204807	-1.92441	0.0543029	0.14946	3L
ASTEI01354	97.0495	-0.504345	0.275052	-1.83364	0.066708	0.16639	3L
ASTEI01355	259.738	0.147791	0.15553	0.950239	0.341991	0.462134	3L
ASTEI01356	855.139	-0.361771	0.196151	-1.84435	0.0651326	0.163995	3L
ASTEI01357	116.424	0.0348772	0.206669	0.168759	0.865986	0.906291	3L
ASTEI01358	102.833	-0.475818	0.296731	-1.60353	0.108817	0.219369	3L
ASTEI01359	2609.04	0.0575508	0.120291	0.478428	0.632346	0.72587	3L
ASTEI01360	348.22	-0.351253	0.239457	-1.46687	0.14241	0.257145	3L
ASTEI01361	136.667	1.26952	0.453053	2.80215	0.00507631	0.0469928	3L
ASTEI01362	7.83183	-0.040718	0.726194	-0.0560705	0.955286	0.968661	3L
ASTEI01363	10.5897	-0.104049	1.5202	-0.0684441	0.945432	0.962294	3L
ASTEI01364	372.823	0.997868	0.452957	2.20301	0.0275941	0.107277	3L
ASTEI01365	140.006	0.212369	0.223692	0.949383	0.342426	0.462425	3L
ASTEI01366	203.403	-0.418791	0.24749	-1.69215	0.0906167	0.196889	3L
ASTEI01367	219.224	-0.441661	0.182875	-2.41509	0.0157313	0.0816077	3L
ASTEI01368	378.25	0.335237	0.384405	0.872093	0.383158	0.502314	3L
ASTEI01369	222.332	-0.357563	0.243699	-1.46723	0.142313	0.257108	3L
ASTEI01370	358.51	1.20621	0.439073	2.74718	0.00601102	0.0511521	3L
ASTEI01371	69.2107	0.200683	0.276306	0.726305	0.467652	0.580577	3L
ASTEI01372	45.4807	0.208785	0.396696	0.526311	0.598672	0.696196	3L
ASTEI01373	48.1959	-0.335523	0.330461	-1.01532	0.309954	0.432478	3L
ASTEI01374	100.377	-0.824687	0.352814	-2.33745	0.0194156	0.0903797	3L
ASTEI01375	28.0836	-0.41726	0.330899	-1.26099	0.207313	0.328059	3L
ASTEI01376	6.98771	0.897187	0.700642	1.28052	0.200362	0.321139	3L
ASTEI01377	501.591	0.703442	0.429372	1.6383	0.101358	0.210473	3L
ASTEI01378	13.2497	0.526298	0.544352	0.966836	0.333626	0.454516	3L
ASTEI01379	55.3131	-0.620266	0.392102	-1.5819	0.113672	0.225476	3L
ASTEI01380	320.18	0.973647	0.402885	2.41669	0.0156626	0.0814624	3L
ASTEI01381	1.20135	0.290595	1.45458	0.199779	0.841654	NA	3L
ASTEI01382	3.46417	0.585695	0.934958	0.626439	0.531027	NA	3L
ASTEI01383	1.92828	2.57921	1.63674	1.57583	0.115066	NA	3L
ASTEI01384	1.65505	0.933212	1.462	0.638311	0.523271	NA	3L
ASTEI01385	22.6816	0.53694	0.682202	0.78707	0.431241	0.54793	3L
ASTEI01386	103.373	1.25721	0.796335	1.57874	0.114396	0.226271	3L
ASTEI01387	19.3851	-0.055859	0.385915	-0.144744	0.884913	0.920867	3L
ASTEI01388	716.408	-0.481198	0.195894	-2.45642	0.0140327	0.0777614	3L
ASTEI01389	4.97061	-0.197257	0.68847	-0.286515	0.774484	0.840692	3L
ASTEI01390	6.70851	0.680554	0.706555	0.963201	0.335447	0.456275	3L
ASTEI01391	135.232	-0.347983	0.286301	-1.21545	0.224196	0.346447	3L
ASTEI01392	121.397	0.418233	0.302723	1.38157	0.167104	0.28528	3L
ASTEI01393	382.494	-0.22341	0.169452	-1.31842	0.187363	0.30715	3L
ASTEI01394	1952.38	1.18628	0.546145	2.1721	0.0298483	0.110794	3L
ASTEI01395	316.182	-0.653954	0.244935	-2.66992	0.00758704	0.0569045	3L
ASTEI01396	92.9117	-0.538764	0.286108	-1.88308	0.0596895	0.156904	3L
ASTEI01397	72.7714	-0.294528	0.332908	-0.88471	0.376313	0.495755	3L
ASTEI01398	802.299	0.904194	0.522329	1.73108	0.0834374	0.188628	3L
ASTEI01399	59.4764	-1.1584	0.363112	-3.19021	0.00142171	0.0225519	3L
ASTEI01400	1222.42	-0.548907	0.202891	-2.70543	0.00682164	0.0543399	3L
ASTEI01401	324.356	-0.988836	0.341847	-2.89263	0.00382031	0.0403857	3L
ASTEI01402	140.099	-1.30358	0.309489	-4.21203	2.53085e-05	0.00163046	3L
ASTEI01403	199.593	0.0853643	0.149115	0.572471	0.567003	0.668624	3L
ASTEI01404	273.917	-0.588458	0.229679	-2.56209	0.0104045	0.0670322	3L
ASTEI01405	935.624	-0.162501	0.140685	-1.15507	0.248061	0.371173	3L
ASTEI01406	105.923	-0.699757	0.267391	-2.61698	0.00887118	0.0621456	3L
ASTEI01407	143.96	-0.349676	0.238606	-1.46549	0.142786	0.257628	3L
ASTEI01408	679.358	0.194875	0.204565	0.952631	0.340777	0.461087	3L
ASTEI01409	15.2384	0.483006	0.487898	0.989974	0.322187	0.44336	3L
ASTEI01410	2.85467	0.182723	1.11868	0.163338	0.870253	NA	3L
ASTEI01411	15.1527	-1.36878	0.420623	-3.25418	0.00113721	0.0201721	3L
ASTEI01412	235.01	0.542945	0.24483	2.21764	0.0265791	0.105403	3L
ASTEI01413	68.2993	0.377025	0.280957	1.34193	0.179618	0.298823	3L
ASTEI01414	105.69	0.285536	0.319341	0.89414	0.371247	0.49062	3L
ASTEI01415	307.379	0.0900286	0.118009	0.762898	0.445524	0.560942	3L
ASTEI01416	32.0296	-0.489381	0.406426	-1.20411	0.228548	0.35116	3L
ASTEI01417	491.91	1.15578	0.523066	2.20962	0.0271315	0.10623	3L
ASTEI01418	306.633	0.993309	0.351072	2.82936	0.00466407	0.045016	3L
ASTEI01419	345.624	-0.445121	0.200535	-2.21967	0.0264409	0.10515	3L
ASTEI01420	185.302	-0.327451	0.223103	-1.46772	0.142181	0.256979	3L
ASTEI01421	160.031	-0.63646	0.27038	-2.35394	0.0185754	0.0883679	3L
ASTEI01422	329.95	0.0771504	0.183324	0.420842	0.67387	0.758691	3L
ASTEI01423	96.9859	-0.187948	0.310833	-0.604659	0.545406	0.649561	3L
ASTEI01424	730.914	-0.0325774	0.111286	-0.292736	0.769724	0.837603	3L
ASTEI01425	298.455	1.52899	0.57332	2.66691	0.00765518	0.0571743	3L
ASTEI01426	48.8284	-0.291961	0.249962	-1.16802	0.242799	0.365853	3L
ASTEI01427	518.302	0.138107	0.131972	1.04649	0.295335	0.417797	3L
ASTEI01428	360.131	-0.490698	0.213576	-2.29754	0.0215881	0.0954328	3L
ASTEI01429	278.133	-0.298014	0.222466	-1.33959	0.180377	0.299611	3L
ASTEI01430	401.135	0.87051	0.444499	1.95841	0.0501821	0.143939	3L
ASTEI01431	214.962	-0.30959	0.208276	-1.48644	0.137163	0.251457	3L
ASTEI01432	62.0437	1.25611	0.722367	1.73888	0.0820551	0.186923	3L
ASTEI01433	1240.81	1.12902	0.505371	2.23404	0.0254804	0.10311	3L
ASTEI01434	144.723	-0.25135	0.235925	-1.06538	0.286705	0.408949	3L
ASTEI01435	686.154	0.323943	0.213569	1.51681	0.129315	0.243184	3L
ASTEI01436	187.62	-0.313322	0.26372	-1.18808	0.2348	0.35739	3L
ASTEI01437	515.634	0.90302	0.415547	2.17309	0.0297736	0.110673	3L
ASTEI01438	623.63	-0.243154	0.157161	-1.54717	0.121823	0.234915	3L
ASTEI01439	907.719	1.13684	0.497454	2.28531	0.0222948	0.0967427	3L
ASTEI01440	65.3836	0.732167	0.486217	1.50584	0.132107	0.246417	3L
ASTEI01441	1288.96	-0.435504	0.186699	-2.33266	0.0196662	0.0909759	3L
ASTEI01442	365.068	1.02161	0.532639	1.91801	0.0551095	0.150391	3L
ASTEI01443	101.306	0.694147	0.383271	1.81111	0.0701236	0.171089	3L
ASTEI01444	222.489	1.45445	0.710829	2.04613	0.040744	0.128476	3L
ASTEI01445	115.369	0.866526	0.498136	1.73954	0.0819404	0.186923	3L
ASTEI01446	492.621	0.629343	0.316179	1.99047	0.0465397	0.138681	3L
ASTEI01447	82.3372	0.778611	0.571687	1.36195	0.173213	0.291725	3L
ASTEI01448	637.172	0.185934	0.188991	0.983824	0.325202	0.446632	3L
ASTEI01449	388.583	-0.293538	0.198692	-1.47736	0.13958	0.254334	3L
ASTEI01450	353.783	-0.41583	0.213336	-1.94918	0.0512741	0.145492	3L
ASTEI01451	50.9085	0.0785744	0.332902	0.236029	0.81341	0.869288	3L
ASTEI01453	925.661	0.396034	0.204071	1.94067	0.0522988	0.146593	3L
ASTEI01454	83.5828	0.598629	0.326658	1.83259	0.0668638	0.16662	3L
ASTEI01455	24.0776	1.01639	0.620045	1.63922	0.101167	0.210387	3L
ASTEI01456	1985.16	-0.165926	0.216081	-0.767891	0.442552	0.558361	3L
ASTEI01457	483.05	-0.335274	0.168438	-1.99049	0.046537	0.138681	3L
ASTEI01458	161.407	-1.06362	0.233835	-4.54858	5.40094e-06	0.000520323	3L
ASTEI01459	55.3147	-0.240316	0.39469	-0.608872	0.54261	0.647199	3L
ASTEI01460	152.776	-0.25734	0.208442	-1.23459	0.216983	0.338492	3L
ASTEI01461	474.624	-0.491152	0.222685	-2.20559	0.0274128	0.106904	3L
ASTEI01462	469.479	0.372874	0.24225	1.53921	0.123753	0.236924	3L
ASTEI01463	994.346	-0.345363	0.165623	-2.08524	0.0370473	0.122762	3L
ASTEI01464	69.2818	-1.26842	0.305861	-4.14707	3.36762e-05	0.00194605	3L
ASTEI01465	2958.01	0.898525	0.401667	2.23699	0.0252871	0.102604	3L
ASTEI01466	4382.26	0.95681	0.4484	2.13383	0.0328568	0.116484	3L
ASTEI01467	2.45965	-0.38109	1.07038	-0.356033	0.721816	NA	3L
ASTEI01468	417.016	-0.524378	0.170346	-3.07832	0.00208174	0.0285756	3L
ASTEI01469	150.298	-0.361841	0.280118	-1.29174	0.196446	0.317464	3L
ASTEI01470	650.741	0.382032	0.425384	0.898087	0.369139	0.488819	3L
ASTEI01471	71.7038	0.810357	0.344929	2.34935	0.0188063	0.0890376	3L
ASTEI01472	55.6984	-0.347809	0.279509	-1.24436	0.213368	0.334771	3L
ASTEI01473	367.344	-0.623932	0.242108	-2.57708	0.00996382	0.0655807	3L
ASTEI01474	355.553	-0.949741	0.255826	-3.71245	0.000205264	0.00667329	3L
ASTEI01475	390.946	1.16935	0.686216	1.70405	0.088371	0.194383	3L
ASTEI01476	528.681	-0.396874	0.205629	-1.93005	0.053601	0.148513	3L
ASTEI01477	260.879	-0.484573	0.246123	-1.96882	0.0489735	0.142367	3L
ASTEI01478	234.916	-0.0874523	0.195966	-0.446263	0.655408	0.743873	3L
ASTEI01479	87.8507	-1.05276	0.387458	-2.71708	0.00658597	0.0533303	3L
ASTEI01480	339.051	0.302414	0.179743	1.68248	0.0924767	0.199159	3L
ASTEI01481	310.859	-0.19545	0.16258	-1.20218	0.229295	0.351896	3L
ASTEI01482	2251.67	-0.392501	0.156142	-2.51374	0.0119458	0.0718609	3L
ASTEI01483	314.725	-0.0804987	0.204847	-0.392971	0.694341	0.775043	3L
ASTEI01484	90.6349	0.185118	0.360737	0.513166	0.607835	0.704279	3L
ASTEI01485	8.34247	0.316502	0.627153	0.504664	0.613795	0.709774	3L
ASTEI01486	474.396	0.127153	0.15985	0.795453	0.42635	0.543271	3L
ASTEI01487	494.042	1.06265	0.685598	1.54995	0.121153	0.234123	3L
ASTEI01488	5.50853	1.30932	0.916505	1.4286	0.153119	0.269913	3L
ASTEI01489	0.224975	0.85041	4.40736	0.192952	0.846996	NA	3L
ASTEI01490	181.915	-0.215729	0.229156	-0.941407	0.346496	0.466123	3L
ASTEI01491	124.73	1.38065	0.674836	2.04591	0.040765	0.128476	3L
ASTEI01492	1135.1	-0.450182	0.197211	-2.28275	0.0224453	0.0970617	3L
ASTEI01493	599.123	0.510337	0.255538	1.99711	0.0458136	0.137219	3L
ASTEI01494	1349.32	0.289567	0.169422	1.70914	0.0874242	0.193109	3L
ASTEI01495	97.9052	-0.373293	0.252205	-1.48011	0.138843	0.253456	3L
ASTEI01496	172.06	-0.303419	0.343518	-0.88327	0.377091	0.496524	3L
ASTEI01497	454.19	0.873855	0.387475	2.25526	0.0241172	0.10021	3L
ASTEI01498	5.62444	0.831177	0.738254	1.12587	0.260222	0.383671	3L
ASTEI01499	642.306	-0.213786	0.129166	-1.65512	0.0978994	0.20605	3L
ASTEI01500	382.991	0.60774	0.35161	1.72845	0.0839081	0.189122	3L
ASTEI01501	34.6297	-0.748712	0.392485	-1.90762	0.0564408	0.152101	3L
ASTEI01502	213.323	-0.0615758	0.214497	-0.287071	0.774058	0.84049	3L
ASTEI01503	158.449	0.132662	0.188378	0.704229	0.48129	0.592222	3L
ASTEI01504	1056.11	0.676029	0.377199	1.79224	0.0730952	0.175045	3L
ASTEI01505	152.526	-0.528105	0.215757	-2.44769	0.0143776	0.0784716	3L
ASTEI01506	63.6768	-0.36521	0.282638	-1.29215	0.196307	0.317385	3L
ASTEI01507	265.61	1.24218	0.645672	1.92386	0.0543726	0.14946	3L
ASTEI01508	220.375	-0.341574	0.191194	-1.78653	0.0740139	0.176174	3L
ASTEI01509	520.066	0.516003	0.434002	1.18894	0.234463	0.357042	3L
ASTEI01510	7.29876	1.13502	0.787631	1.44106	0.149567	0.265844	3L
ASTEI01511	1.45304	-1.11394	1.53009	-0.728018	0.466602	NA	3L
ASTEI01512	64.7818	-0.623549	0.306426	-2.03491	0.0418599	0.130541	3L
ASTEI01513	144.879	0.71493	0.466186	1.53357	0.125135	0.238062	3L
ASTEI01514	31.8725	0.24124	0.357818	0.674198	0.500185	0.609175	3L
ASTEI01515	100.671	0.930332	0.310187	2.99926	0.00270634	0.0339538	3L
ASTEI01516	161.992	-0.540497	0.302201	-1.78853	0.0736898	0.175708	3L
ASTEI01517	879.467	-0.171199	0.190674	-0.897861	0.36926	0.488916	3L
ASTEI01518	401.242	0.0852794	0.188714	0.451898	0.651342	0.739999	3L
ASTEI01519	575.619	-0.33687	0.198644	-1.69585	0.0899148	0.19604	3L
ASTEI01520	131.059	-0.0865393	0.266653	-0.324539	0.74553	0.817204	3L
ASTEI01521	633.083	0.598747	0.365299	1.63906	0.101201	0.210392	3L
ASTEI01522	90.5338	0.0772349	0.241465	0.319859	0.749075	0.820233	3L
ASTEI01523	211.939	-0.650283	0.240633	-2.70239	0.00688428	0.0545188	3L
ASTEI01524	129.927	-0.498681	0.235908	-2.11388	0.0345257	0.119065	3L
ASTEI01525	52.2687	0.12591	0.326124	0.386081	0.699437	0.779205	3L
ASTEI01526	427.966	0.986751	0.34322	2.87498	0.00404057	0.0417208	3L
ASTEI01527	55.1371	0.655055	0.255668	2.56213	0.0104032	0.0670322	3L
ASTEI01528	116.919	-0.433909	0.228143	-1.90192	0.0571813	0.153062	3L
ASTEI01529	3.03373	0.265346	0.99811	0.265848	0.790356	NA	3L
ASTEI01530	2053.75	0.410993	0.320283	1.28322	0.199416	0.320056	3L
ASTEI01531	235.92	0.0120606	0.213824	0.0564042	0.95502	0.968661	3L
ASTEI01532	111.528	-0.749514	0.259248	-2.89111	0.00383885	0.0404736	3L
ASTEI01533	592.658	-0.168706	0.170937	-0.986945	0.32367	0.445051	3L
ASTEI01534	564.934	-0.287837	0.181036	-1.58994	0.111848	0.223207	3L
ASTEI01535	495.208	-0.7085	0.246644	-2.87256	0.00407156	0.0418609	3L
ASTEI01536	357.369	0.785737	0.456025	1.72301	0.0848863	0.190037	3L
ASTEI01537	837.39	-0.0434194	0.148929	-0.291543	0.770636	0.838454	3L
ASTEI01538	1117	-0.262884	0.14554	-1.80627	0.0708761	0.171975	3L
ASTEI01539	219.3	0.479549	0.315278	1.52103	0.128251	0.24205	3L
ASTEI01540	881.753	-0.355202	0.186204	-1.9076	0.0564432	0.152101	3L
ASTEI01541	338.58	-0.334319	0.163827	-2.04069	0.0412818	0.129319	3L
ASTEI01542	179.518	-0.197558	0.179667	-1.09958	0.271515	0.394409	3L
ASTEI01543	323.863	-0.586687	0.202219	-2.90125	0.00371681	0.0397634	3L
ASTEI01544	285.694	0.661314	0.443047	1.49265	0.135529	0.250008	3L
ASTEI01545	176.436	0.576138	0.559167	1.03035	0.302846	0.425785	3L
ASTEI01546	898.04	0.453881	0.318695	1.42418	0.154393	0.271462	3L
ASTEI01547	448.916	0.552953	0.331117	1.66996	0.0949271	0.202449	3L
ASTEI01548	270.346	-0.47217	0.227113	-2.07901	0.0376168	0.123558	3L
ASTEI01549	390.166	-0.557741	0.203449	-2.74143	0.00611722	0.0516374	3L
ASTEI01550	344.663	0.668456	0.580229	1.15206	0.249298	0.372122	3L
ASTEI01551	235.318	-0.490092	0.179763	-2.72633	0.0064043	0.0527679	3L
ASTEI01552	17.9232	0.878952	0.605512	1.45158	0.146617	0.262198	3L
ASTEI01553	307.473	-0.448925	0.211074	-2.12686	0.0334318	0.117536	3L
ASTEI01554	119.363	1.27021	0.574377	2.21145	0.0270047	0.106169	3L
ASTEI01555	369.749	0.782745	0.432148	1.81129	0.0700964	0.171063	3L
ASTEI01556	277.919	0.254792	0.238786	1.06703	0.285957	0.408336	3L
ASTEI01557	135.597	-0.400902	0.248045	-1.61625	0.10604	0.215926	3L
ASTEI01558	53.2956	0.512155	0.274418	1.86633	0.0619945	0.160118	3L
ASTEI01559	175.367	-0.560941	0.254127	-2.20733	0.0272911	0.106616	3L
ASTEI01560	105.982	-0.329594	0.238596	-1.38139	0.167159	0.285328	3L
ASTEI01561	253.873	-0.380377	0.258875	-1.46935	0.141739	0.256454	3L
ASTEI01562	187.626	-0.422824	0.243183	-1.73871	0.082086	0.186923	3L
ASTEI01563	54.7383	-0.219382	0.335984	-0.652954	0.513786	0.621736	3L
ASTEI01564	758.386	-0.191176	0.131905	-1.44935	0.147241	0.262955	3L
ASTEI01565	509.067	0.372191	0.226999	1.63961	0.101086	0.210323	3L
ASTEI01566	128.157	-0.297682	0.213058	-1.39719	0.162357	0.280829	3L
ASTEI01567	35.0807	-0.754756	0.356494	-2.11717	0.0342456	0.118684	3L
ASTEI01568	36.1105	-0.69389	0.420557	-1.64993	0.0989573	0.207131	3L
ASTEI01569	46.3154	-1.023	0.303085	-3.37528	0.000737394	0.0158656	3L
ASTEI01570	455.951	0.463984	0.292287	1.58743	0.112416	0.223915	3L
ASTEI01571	210.931	0.149639	0.288932	0.517903	0.604526	0.701218	3L
ASTEI01572	592.184	-0.0233748	0.173848	-0.134455	0.893043	0.92703	3L
ASTEI01573	391.14	-0.337451	0.136164	-2.47827	0.0132021	0.0753323	3L
ASTEI01574	252.871	0.148994	0.301705	0.493839	0.62142	0.716461	3L
ASTEI01575	714.622	-0.496429	0.141436	-3.50993	0.000448221	0.0117669	3L
ASTEI01576	395.99	-0.114526	0.140914	-0.812738	0.416368	0.534248	3L
ASTEI01577	134.288	0.798168	0.42882	1.86131	0.0627	0.160981	3L
ASTEI01578	552.186	-0.0163466	0.151108	-0.108178	0.913854	0.941099	3L
ASTEI01579	69.887	1.02896	0.693649	1.4834	0.137968	0.252273	3L
ASTEI01580	53.9574	0.838633	0.437478	1.91697	0.0552414	0.150561	3L
ASTEI01581	109.947	-0.408478	0.288155	-1.41756	0.156319	0.27372	3L
ASTEI01582	0.552806	1.72232	2.59661	0.663295	0.507142	NA	3L
ASTEI01583	396.916	-0.00504732	0.163023	-0.0309608	0.975301	0.982882	3L
ASTEI01584	337.676	-0.936759	0.308816	-3.03339	0.00241822	0.0317421	3L
ASTEI01585	6.7513	2.52442	0.782097	3.22776	0.00124764	0.0209138	3L
ASTEI01586	392.352	-0.329191	0.143221	-2.29848	0.0215347	0.0953928	3L
ASTEI01587	211.691	-0.33799	0.245264	-1.37807	0.168182	0.286376	3L
ASTEI01588	119.052	-0.322304	0.306539	-1.05143	0.293062	0.415646	3L
ASTEI01589	181.552	-0.51035	0.234718	-2.17431	0.0296819	0.110504	3L
ASTEI01590	2.91085	-1.11347	1.06379	-1.04671	0.295235	NA	3L
ASTEI01591	978.309	-0.31986	0.173494	-1.84364	0.0652361	0.164004	3L
ASTEI01592	563.495	-0.126948	0.155611	-0.815806	0.414611	0.53256	3L
ASTEI01593	528.059	-0.265752	0.181185	-1.46675	0.142445	0.257145	3L
ASTEI01594	739.26	-0.504774	0.195735	-2.57886	0.0099127	0.0654263	3L
ASTEI01595	21.7652	-0.0228293	0.386748	-0.0590288	0.952929	0.967583	3L
ASTEI01596	263.375	-0.76048	0.231173	-3.28965	0.00100311	0.0187431	3L
ASTEI01597	208.513	-0.658534	0.175025	-3.76251	0.000168218	0.00573524	3L
ASTEI01598	226.004	-0.338273	0.151298	-2.2358	0.025365	0.102841	3L
ASTEI01599	178.212	-0.150178	0.200637	-0.748504	0.454156	0.568609	3L
ASTEI01600	314.581	0.471898	0.175436	2.68986	0.0071481	0.0552741	3L
ASTEI01601	87.0346	-0.108281	0.258613	-0.418699	0.675436	0.759721	3L
ASTEI01602	446.275	0.47452	0.465318	1.01978	0.307835	0.430889	3L
ASTEI01603	142.007	0.363687	0.167382	2.17279	0.029796	0.110717	3L
ASTEI01604	94.4824	-1.41945	0.232857	-6.09581	1.08882e-09	3.6883e-07	3L
ASTEI01605	442.72	-0.381683	0.118542	-3.2198	0.00128278	0.0212469	3L
ASTEI01606	541.515	-0.121182	0.274105	-0.442099	0.658417	0.746085	3L
ASTEI01607	1034.61	-0.238407	0.138866	-1.71681	0.0860144	0.191415	3L
ASTEI01608	79.0949	0.320514	0.228715	1.40137	0.161104	0.27949	3L
ASTEI01609	334.28	-0.625139	0.253506	-2.46597	0.0136642	0.0768546	3L
ASTEI01610	168.079	-0.842128	0.273675	-3.0771	0.00209022	0.0286316	3L
ASTEI01611	584.7	0.333693	0.132396	2.52041	0.0117217	0.0713561	3L
ASTEI01612	72.7268	0.939815	0.552119	1.7022	0.0887184	0.194902	3L
ASTEI01613	9.78828	-0.891986	0.531043	-1.67969	0.0930181	0.199849	3L
ASTEI01614	222.801	0.442187	0.622534	0.710302	0.477517	0.589168	3L
ASTEI01615	172.696	-0.124806	0.370879	-0.336514	0.736483	0.810163	3L
ASTEI01616	533.527	-0.522986	0.207782	-2.51699	0.0118363	0.0716041	3L
ASTEI01617	1721.63	-0.0497018	0.0895729	-0.554875	0.57898	0.679012	3L
ASTEI01618	2125.44	-0.197215	0.0976347	-2.01993	0.0433911	0.133071	3L
ASTEI01619	11.279	-0.660924	0.547242	-1.20774	0.227149	0.350177	3L
ASTEI01620	1726.36	0.919545	0.438764	2.09576	0.0361033	0.121619	3L
ASTEI01621	881.804	-0.338842	0.123858	-2.73572	0.0062244	0.0520401	3L
ASTEI01622	1018.04	0.361876	0.260778	1.38768	0.165235	0.283535	3L
ASTEI01623	852.745	-0.238758	0.148598	-1.60674	0.108111	0.218573	3L
ASTEI01624	217.108	-0.343246	0.211753	-1.62097	0.105024	0.214479	3L
ASTEI01625	93.8409	-0.194877	0.232468	-0.838298	0.401863	0.520386	3L
ASTEI01626	297.652	-0.369765	0.209135	-1.76807	0.0770491	0.180762	3L
ASTEI01627	524.636	-0.163196	0.193868	-0.841789	0.399906	0.518638	3L
ASTEI01628	854.719	-0.417412	0.21415	-1.94916	0.0512767	0.145492	3L
ASTEI01629	392.735	-1.14	0.676989	-1.68393	0.0921947	0.198755	3R
ASTEI01630	250.829	-0.276396	0.250999	-1.10119	0.270816	0.393883	3R
ASTEI01631	1753.48	-0.27526	0.144315	-1.90735	0.0564748	0.152101	3R
ASTEI01632	111.464	1.01516	0.476976	2.12833	0.0333094	0.11737	3R
ASTEI01633	281.442	-0.320119	0.200993	-1.59269	0.11123	0.222469	3R
ASTEI01636	0.621059	-1.07315	2.5693	-0.41768	0.676181	NA	3R
ASTEI01638	218.54	0.751718	0.451209	1.66601	0.0957116	0.20329	3R
ASTEI01639	285.251	-0.196639	0.200021	-0.983094	0.325561	0.447008	3R
ASTEI01640	7.65831	-0.875768	0.703827	-1.24429	0.213391	0.334771	3R
ASTEI01641	481.646	0.892131	0.370064	2.41075	0.0159198	0.0821142	3R
ASTEI01642	527.47	-0.43015	0.182079	-2.36244	0.0181552	0.0875292	3R
ASTEI01643	84.2631	-0.441647	0.283422	-1.55827	0.11917	0.231907	3R
ASTEI01644	340.142	-0.440325	0.22936	-1.9198	0.0548836	0.150165	3R
ASTEI01645	1214.03	1.2689	0.51984	2.44095	0.0146486	0.0792095	3R
ASTEI01646	396.529	1.58849	0.692991	2.29222	0.0218931	0.0958712	3R
ASTEI01647	528.416	0.100499	0.173636	0.578793	0.562729	0.664778	3R
ASTEI01648	129.477	0.634548	0.411441	1.54226	0.123011	0.236318	3R
ASTEI01649	366.016	-0.380268	0.170279	-2.2332	0.0255356	0.103174	3R
ASTEI01650	84.4224	-0.507452	0.201929	-2.51302	0.0119702	0.0718691	3R
ASTEI01651	17.7654	-0.119591	0.421874	-0.283475	0.776813	0.842175	3R
ASTEI01652	581.889	1.04199	0.462593	2.25251	0.0242902	0.100659	3R
ASTEI01653	110.551	1.86965	0.685786	2.72629	0.00640517	0.0527679	3R
ASTEI01654	351.063	1.88779	0.605979	3.11526	0.0018378	0.0265327	3R
ASTEI01655	17.8281	-0.790242	0.417174	-1.89427	0.0581887	0.15459	3R
ASTEI01656	2.19451	0.256785	1.32797	0.193367	0.846672	NA	3R
ASTEI01657	95.2662	0.448046	0.321325	1.39437	0.163205	0.281785	3R
ASTEI01658	0.482726	-0.640161	2.41861	-0.264681	0.791255	NA	3R
ASTEI01659	371.308	-0.0258632	0.237372	-0.108957	0.913237	0.940776	3R
ASTEI01660	12.5002	-0.755857	0.544097	-1.3892	0.164773	0.28318	3R
ASTEI01661	262.659	-1.13231	0.300495	-3.76815	0.00016446	0.00573524	3R
ASTEI01662	31.0908	-0.573529	0.505049	-1.13559	0.256128	0.379475	3R
ASTEI01663	237.31	0.813927	0.538899	1.51035	0.130954	0.245037	3R
ASTEI01664	1161.32	0.0264674	0.106419	0.24871	0.803585	0.862156	3R
ASTEI01665	1953.19	-0.315336	0.150395	-2.09671	0.0360189	0.1215	3R
ASTEI01666	22.2483	0.560132	0.391283	1.43153	0.152279	0.268864	3R
ASTEI01667	694.04	1.30037	0.427109	3.04458	0.00233004	0.0309327	3R
ASTEI01668	107.347	-0.450895	0.251078	-1.79584	0.0725203	0.174186	3R
ASTEI01669	1111.38	-0.209628	0.12403	-1.69014	0.0910013	0.197317	3R
ASTEI01670	1.25841	-1.05399	1.59455	-0.660996	0.508615	NA	3R
ASTEI01671	831.107	0.461849	0.264292	1.74749	0.0805521	0.185215	3R
ASTEI01672	15.7349	-0.564196	0.461601	-1.22226	0.22161	0.34374	3R
ASTEI01673	3.61191	-0.954859	0.98725	-0.96719	0.333449	NA	3R
ASTEI01674	6.13659	-0.158299	0.716382	-0.22097	0.825116	0.878044	3R
ASTEI01675	1610.27	-0.391586	0.184077	-2.1273	0.0333952	0.117521	3R
ASTEI01676	258.317	-1.09327	0.387825	-2.81896	0.0048179	0.0455791	3R
ASTEI01677	115.572	-0.104401	0.233984	-0.44619	0.65546	0.743873	3R
ASTEI01678	1498.7	0.160035	0.151307	1.05768	0.2902	0.412758	3R
ASTEI01679	226.772	-0.0457423	0.207359	-0.220595	0.825408	0.878266	3R
ASTEI01680	206.412	1.23568	0.585366	2.11095	0.0347767	0.119421	3R
ASTEI01681	105.434	1.12023	0.285378	3.92542	8.65784e-05	0.00369577	3R
ASTEI01682	31.9051	0.123058	0.378504	0.325118	0.745092	0.816953	3R
ASTEI01683	166.915	0.522231	0.283468	1.84229	0.0654322	0.164339	3R
ASTEI01684	70.1065	-0.406205	0.321932	-1.26177	0.207032	0.327852	3R
ASTEI01685	233.788	0.0415225	0.18712	0.221903	0.82439	0.877449	3R
ASTEI01686	460.684	1.17997	0.702327	1.68008	0.0929413	0.19979	3R
ASTEI01687	146.99	-0.233914	0.204976	-1.14118	0.253796	0.37696	3R
ASTEI01688	611.5	-0.328395	0.183993	-1.78482	0.0742901	0.176498	3R
ASTEI01689	6.74486	-0.249464	0.5645	-0.441921	0.658546	0.746085	3R
ASTEI01690	82.3067	-0.294927	0.294124	-1.00273	0.315992	0.438141	3R
ASTEI01691	327.181	0.0319505	0.185786	0.171975	0.863457	0.904455	3R
ASTEI01693	412.246	0.265206	0.406178	0.65293	0.513801	0.621736	3R
ASTEI01694	741.444	0.14948	0.204528	0.730856	0.464867	0.578248	3R
ASTEI01695	30.5176	0.0341994	0.333593	0.102518	0.918345	0.944494	3R
ASTEI01696	29.9085	0.0784703	0.406301	0.193133	0.846855	0.892585	3R
ASTEI01697	119.172	-0.0527319	0.209194	-0.252072	0.800986	0.860036	3R
ASTEI01698	0.560979	-0.11137	2.94057	-0.0378734	0.969789	NA	3R
ASTEI01699	4.10862	-1.5285	0.996027	-1.53459	0.124883	0.237872	3R
ASTEI01700	31.5422	-0.359776	0.448623	-0.801956	0.422579	0.540053	3R
ASTEI01701	466.337	0.0584874	0.128502	0.455146	0.649004	0.738774	3R
ASTEI01702	174.183	-0.692934	0.250403	-2.76727	0.00565273	0.0496315	3R
ASTEI01703	520.672	-0.0678597	0.184597	-0.367609	0.713165	0.790557	3R
ASTEI01704	209.383	0.125958	0.17892	0.70399	0.481439	0.5923	3R
ASTEI01705	2340.41	-0.344807	0.200897	-1.71633	0.0861013	0.191508	3R
ASTEI01706	230.349	-1.2014	0.427984	-2.80712	0.0049986	0.0464516	3R
ASTEI01707	754.914	-0.551211	0.302466	-1.82239	0.0683964	0.168757	3R
ASTEI01708	156.545	-0.0766834	0.255186	-0.3005	0.763796	0.832705	3R
ASTEI01709	182.254	-0.0414709	0.215231	-0.192681	0.847209	0.892758	3R
ASTEI01710	756.539	-0.726424	0.216716	-3.35196	0.000802427	0.0164898	3R
ASTEI01711	386.701	-0.518986	0.163401	-3.17616	0.00149239	0.0231828	3R
ASTEI01712	42.3288	-0.725324	0.402783	-1.80078	0.0717377	0.173336	3R
ASTEI01713	956.44	-0.163188	0.193756	-0.842238	0.399655	0.518638	3R
ASTEI01714	236.551	-0.244091	0.190801	-1.2793	0.200793	0.321471	3R
ASTEI01715	199.998	0.391999	0.212209	1.84723	0.0647143	0.163357	3R
ASTEI01716	21.6019	0.371557	0.403541	0.920743	0.357185	0.476231	3R
ASTEI01717	0.764856	-2.51617	2.37752	-1.05832	0.28991	NA	3R
ASTEI01718	446.717	-0.300812	0.218667	-1.37566	0.168927	0.287237	3R
ASTEI01719	203.022	0.695851	0.323255	2.15264	0.031347	0.113548	3R
ASTEI017191	28.338	-0.5948	0.408632	-1.45559	0.145507	0.260745	3R
ASTEI017192	144.846	-0.192854	0.154593	-1.2475	0.212214	0.333702	3R
ASTEI01720	1365.41	-0.246567	0.119249	-2.06766	0.0386722	0.125092	3R
ASTEI01722	21.3644	-0.162173	0.412929	-0.39274	0.694512	0.775077	3R
ASTEI01723	1154.41	0.751544	0.22708	3.30961	0.000934273	0.0179345	3R
ASTEI01724	410.121	0.0669862	0.196354	0.341151	0.73299	0.807349	3R
ASTEI01725	1158.59	0.589439	0.435057	1.35485	0.175464	0.294337	3R
ASTEI01727	1309.36	-0.219086	0.120186	-1.82288	0.068321	0.16865	3R
ASTEI01728	102.278	-0.166738	0.197952	-0.842312	0.399613	0.518638	3R
ASTEI01729	77.492	-0.232344	0.309689	-0.750252	0.453103	0.56769	3R
ASTEI01730	1589.74	-0.233838	0.152495	-1.53342	0.125174	0.238081	3R
ASTEI01731	143.035	-0.300487	0.195495	-1.53706	0.124279	0.237411	3R
ASTEI01732	204.215	0.293224	0.158485	1.85017	0.0642893	0.162754	3R
ASTEI01733	101.956	0.870758	0.473016	1.84086	0.0656415	0.164744	3R
ASTEI01734	946.589	0.581942	0.254469	2.28688	0.0222027	0.0966065	3R
ASTEI01735	64.9178	-0.114359	0.262087	-0.436339	0.662591	0.749205	3R
ASTEI01736	41.3725	-0.304792	0.268406	-1.13556	0.256139	0.379475	3R
ASTEI01737	36.1925	-0.172071	0.35498	-0.484734	0.627865	0.722494	3R
ASTEI01738	87.483	-0.401047	0.232483	-1.72506	0.084517	0.189817	3R
ASTEI01739	1466.11	0.255692	0.171983	1.48673	0.137087	0.251399	3R
ASTEI01740	0.562112	-1.07714	2.27512	-0.473442	0.635898	NA	3R
ASTEI01741	259.808	0.0960369	0.140029	0.685836	0.492816	0.602873	3R
ASTEI01742	39.2971	-0.694867	0.343997	-2.01998	0.0433853	0.133071	3R
ASTEI01743	167.479	-0.25717	0.204962	-1.25472	0.209581	0.330749	3R
ASTEI01744	243.508	-0.14501	0.199692	-0.72617	0.467735	0.580577	3R
ASTEI01745	147.381	-0.631412	0.284679	-2.21798	0.0265562	0.105352	3R
ASTEI01746	1.66391	-0.658718	1.205	-0.546655	0.584616	NA	3R
ASTEI01747	932.973	0.269511	0.155771	1.73017	0.0835994	0.18872	3R
ASTEI01748	101.316	0.707711	0.236811	2.98851	0.00280344	0.0345326	3R
ASTEI01749	37.7906	0.134694	0.319723	0.421284	0.673548	0.758491	3R
ASTEI01750	153.456	-0.179472	0.215058	-0.834528	0.403983	0.522442	3R
ASTEI01751	172.531	-0.190709	0.173408	-1.09977	0.271433	0.394386	3R
ASTEI01752	26.3028	0.540172	0.598709	0.902228	0.366936	0.486698	3R
ASTEI01753	0.163215	1.71444	4.37055	0.392272	0.694858	NA	3R
ASTEI01754	135.164	0.630931	0.325289	1.9396	0.0524281	0.146787	3R
ASTEI01755	139.441	0.366277	0.309802	1.18229	0.237089	0.359624	3R
ASTEI01756	26.6238	0.606055	0.399748	1.51609	0.129496	0.243393	3R
ASTEI01757	231.689	0.671335	0.497249	1.3501	0.176985	0.295848	3R
ASTEI01758	0.294681	-0.111327	4.22558	-0.026346	0.978981	NA	3R
ASTEI01759	62.0778	-0.207272	0.284808	-0.727761	0.46676	0.579984	3R
ASTEI01760	276.692	0.850285	0.390081	2.17976	0.0292751	0.109949	3R
ASTEI01761	421.286	-0.17047	0.169733	-1.00434	0.315214	0.437434	3R
ASTEI01762	181.999	0.814534	0.337198	2.41559	0.0157097	0.0815862	3R
ASTEI01763	239.942	-0.32874	0.148174	-2.21861	0.0265132	0.10523	3R
ASTEI01764	277.809	-0.319174	0.192617	-1.65704	0.0975111	0.205657	3R
ASTEI01765	100.833	-0.367854	0.302412	-1.2164	0.223833	0.346064	3R
ASTEI01766	1321.39	-0.173501	0.144454	-1.20108	0.229718	0.352414	3R
ASTEI01767	55.2615	-0.135136	0.245853	-0.54966	0.582553	0.681831	3R
ASTEI01768	24.9948	-0.353856	0.385128	-0.9188	0.3582	0.477342	3R
ASTEI01769	512.017	0.362493	0.321165	1.12868	0.259033	0.382521	3R
ASTEI01770	106.002	-1.56501	0.485698	-3.22218	0.00127218	0.0211483	3R
ASTEI01771	0.89789	0.301476	1.50588	0.200199	0.841325	NA	3R
ASTEI01772	490.282	-0.0126217	0.13428	-0.0939957	0.925113	0.948812	3R
ASTEI01773	866.191	0.264594	0.235205	1.12495	0.26061	0.383878	3R
ASTEI01774	226.015	-0.73604	0.262029	-2.809	0.0049695	0.0463487	3R
ASTEI01775	30.8577	-2.06741	0.457516	-4.51878	6.21974e-06	0.000577995	3R
ASTEI01776	2632.13	-0.195182	0.127506	-1.53078	0.125825	0.238974	3R
ASTEI01777	6.76472	2.03759	0.76374	2.6679	0.0076326	0.0570869	3R
ASTEI01778	161.457	0.658186	0.277667	2.37041	0.0177683	0.0866226	3R
ASTEI01779	39.1368	1.60111	0.803408	1.9929	0.0462726	0.138245	3R
ASTEI01780	4.49794	0.614618	1.02406	0.600177	0.548388	0.652018	3R
ASTEI01781	488.941	1.46395	0.747305	1.95898	0.0501155	0.143866	3R
ASTEI01782	1870.89	-0.465939	0.177711	-2.62188	0.00874454	0.0616636	3R
ASTEI01783	126.112	-0.355287	0.242513	-1.46502	0.142914	0.257721	3R
ASTEI01784	55.8141	0.38238	0.435896	0.877228	0.380363	0.499711	3R
ASTEI01785	22.5137	0.476323	0.429691	1.10852	0.267635	0.390987	3R
ASTEI01786	50.6235	0.506806	0.423341	1.19716	0.231245	0.354107	3R
ASTEI01787	70.323	-0.895565	0.327925	-2.731	0.0063142	0.05254	3R
ASTEI01788	375.273	1.26315	0.649879	1.94367	0.0519347	0.146133	3R
ASTEI01789	442.558	0.163253	0.165523	0.986288	0.323992	0.445319	3R
ASTEI01790	344.908	1.1605	0.537493	2.15909	0.0308431	0.112706	3R
ASTEI01791	146.337	1.25916	0.74915	1.68078	0.0928047	0.199579	3R
ASTEI01792	12.2136	0.330793	0.603701	0.547942	0.583732	0.682837	3R
ASTEI01793	120.551	1.04305	0.658274	1.58452	0.113076	0.224646	3R
ASTEI01794	210.938	-0.446819	0.216325	-2.0655	0.0388762	0.125457	3R
ASTEI01795	224.303	-0.016165	0.162965	-0.099193	0.920985	0.946102	3R
ASTEI01796	327.113	-0.395956	0.164268	-2.41043	0.0159337	0.0821142	3R
ASTEI01797	5.67314	1.48577	0.918393	1.61779	0.105708	0.215499	3R
ASTEI01798	422.052	-0.166457	0.177152	-0.939628	0.347408	0.466872	3R
ASTEI017980	29.8997	-0.145538	0.475184	-0.306277	0.759394	0.828939	3R
ASTEI017981	0.82969	0.435749	1.94893	0.223584	0.823081	NA	3R
ASTEI01799	20.7191	0.264363	0.408372	0.647358	0.5174	0.62537	3R
ASTEI01800	114.379	-0.191293	0.176912	-1.08129	0.279568	0.402211	3R
ASTEI01802	0.408645	0.136064	3.86826	0.0351746	0.971941	NA	3R
ASTEI01803	473.047	-0.436844	0.154945	-2.81934	0.00481223	0.0455791	3R
ASTEI01804	171.35	-0.591577	0.272896	-2.16777	0.0301759	0.111341	3R
ASTEI01805	12.8127	-0.349204	0.619692	-0.563513	0.573086	0.674207	3R
ASTEI01806	279.025	0.355765	0.377381	0.94272	0.345824	0.465457	3R
ASTEI01807	1.47184	3.60076	1.66067	2.16826	0.0301392	NA	3R
ASTEI01808	11.7762	0.644519	0.470526	1.36978	0.170754	0.289395	3R
ASTEI01809	399.368	0.606481	0.28725	2.11133	0.0347436	0.119413	3R
ASTEI01810	172.197	0.438267	0.201416	2.17593	0.0295603	0.110271	3R
ASTEI01811	214.086	-0.352507	0.218572	-1.61277	0.106794	0.216955	3R
ASTEI01812	202.522	-0.248477	0.185687	-1.33815	0.180847	0.299964	3R
ASTEI01814	110.63	-0.0223945	0.421298	-0.0531561	0.957608	0.970079	3R
ASTEI01815	219.206	-0.204024	0.207119	-0.985054	0.324598	0.445918	3R
ASTEI01816	846.355	-0.250681	0.228687	-1.09617	0.273002	0.395941	3R
ASTEI01818	74.1207	-0.755486	0.324728	-2.32652	0.0199908	0.0917095	3R
ASTEI01819	67.5947	-0.595374	0.308734	-1.92843	0.0538011	0.148832	3R
ASTEI01820	495.574	-0.479764	0.198608	-2.41564	0.0157077	0.0815862	3R
ASTEI01821	2350.42	-0.119604	0.190975	-0.626278	0.531132	0.637565	3R
ASTEI01822	85.9726	-0.228599	0.246556	-0.927171	0.353838	0.473091	3R
ASTEI01823	494.715	-0.0855126	0.185899	-0.459994	0.64552	0.736485	3R
ASTEI01824	15.9115	1.43388	0.622062	2.30504	0.0211644	0.0947751	3R
ASTEI01825	8.11415	-0.773604	0.674348	-1.14719	0.251304	0.374425	3R
ASTEI01826	164.011	0.638396	0.312787	2.04099	0.0412516	0.12927	3R
ASTEI01827	88.2187	-0.877212	0.404927	-2.16635	0.0302846	0.111551	3R
ASTEI01828	151.189	-0.396469	0.272743	-1.45364	0.146047	0.261535	3R
ASTEI01829	2057.38	-0.164531	0.105059	-1.56608	0.117331	0.22972	3R
ASTEI01830	180.911	1.23055	0.713461	1.72477	0.0845695	0.189817	3R
ASTEI01831	197.527	-0.377157	0.159545	-2.36395	0.018081	0.0873764	3R
ASTEI01832	17.7804	-0.175196	0.535144	-0.327381	0.74338	0.815528	3R
ASTEI01833	1.45601	0.0368243	1.89485	0.0194339	0.984495	NA	3R
ASTEI01834	611.718	0.218491	0.363013	0.601883	0.547252	0.651036	3R
ASTEI01835	361.274	0.571506	0.573264	0.996932	0.318797	0.44095	3R
ASTEI01836	92.0548	-0.33065	0.307713	-1.07454	0.28258	0.405174	3R
ASTEI01837	530.02	0.540179	0.288828	1.87024	0.0614499	0.159215	3R
ASTEI01838	112.791	0.620834	0.269101	2.30707	0.0210508	0.0945636	3R
ASTEI01839	57.485	0.964056	0.589868	1.63436	0.102184	0.211357	3R
ASTEI01840	318.296	0.00213965	0.216131	0.00989977	0.992101	0.994279	3R
ASTEI01841	1717.15	0.458959	0.319596	1.43606	0.150985	0.267529	3R
ASTEI01842	90.0796	-0.717805	0.309516	-2.31912	0.0203884	0.0928845	3R
ASTEI01843	78.3038	-0.561876	0.271755	-2.06758	0.0386795	0.125092	3R
ASTEI01844	4.46294	1.41819	0.877228	1.61667	0.105949	0.215824	3R
ASTEI01845	31.6051	-1.38999	0.419278	-3.3152	0.000915778	0.0178415	3R
ASTEI01846	133.649	-0.110024	0.195527	-0.562708	0.573634	0.674626	3R
ASTEI01847	446.958	1.44867	0.629599	2.30094	0.0213948	0.0951491	3R
ASTEI01848	151.588	-0.711721	0.260689	-2.73015	0.00633051	0.0525597	3R
ASTEI01849	184.99	1.3834	0.578459	2.39153	0.0167782	0.084099	3R
ASTEI01850	7.80634	1.45828	1.01566	1.43579	0.151061	0.267593	3R
ASTEI01851	8.20345	1.12598	0.930159	1.21052	0.226079	0.348975	3R
ASTEI01852	146.221	-0.0457596	0.218958	-0.208988	0.834457	0.884579	3R
ASTEI01853	97.6209	-0.0978904	0.271183	-0.360976	0.718118	0.794956	3R
ASTEI01854	306.403	0.299153	0.255308	1.17173	0.241305	0.364229	3R
ASTEI01855	103.381	-0.585746	0.277675	-2.10947	0.0349044	0.119703	3R
ASTEI01856	334.425	0.170893	0.181709	0.940474	0.346974	0.466467	3R
ASTEI01857	98.216	0.165925	0.222043	0.747264	0.454904	0.569226	3R
ASTEI01858	2.07604	-2.11116	1.34464	-1.57005	0.116403	NA	3R
ASTEI01859	83.1786	0.500275	0.232737	2.14953	0.0315925	0.113926	3R
ASTEI018590	842.459	0.909575	0.346138	2.62778	0.00859434	0.0611444	3R
ASTEI018591	87.7986	-0.208156	0.232647	-0.894729	0.370932	0.490389	3R
ASTEI01860	186.475	0.301532	0.15413	1.95634	0.0504251	0.144229	3R
ASTEI01861	5.82835	0.946146	0.752978	1.25654	0.208921	0.329956	3R
ASTEI01862	829.711	-0.180776	0.112291	-1.60988	0.107423	0.217944	3R
ASTEI01863	60.037	-0.702928	0.320443	-2.19361	0.0282635	0.108359	3R
ASTEI01864	185.232	-1.15927	0.300011	-3.86409	0.000111503	0.00436899	3R
ASTEI01865	0.157352	0.850401	4.40736	0.19295	0.846998	NA	3R
ASTEI01866	62.5348	-0.148407	0.233001	-0.636935	0.524167	0.631297	3R
ASTEI01867	735.837	-0.499559	0.193331	-2.58396	0.00976744	0.0650399	3R
ASTEI01869	285.718	0.34932	0.22468	1.55475	0.120006	0.232592	3R
ASTEI01871	24.9131	0.332407	0.384647	0.864188	0.387484	0.506659	3R
ASTEI01872	103.176	-0.261844	0.254483	-1.02892	0.303516	0.426399	3R
ASTEI01873	165.412	-0.644446	0.208569	-3.08984	0.00200261	0.0279647	3R
ASTEI01874	1416.36	0.648433	0.459905	1.40993	0.158561	0.276448	3R
ASTEI01875	228.694	0.0526878	0.16207	0.325093	0.745111	0.816953	3R
ASTEI01876	15.8822	-0.522749	0.4836	-1.08095	0.279718	0.402317	3R
ASTEI01877	181.873	0.729761	0.550221	1.32631	0.184738	0.304399	3R
ASTEI01878	91.1865	-0.26291	0.201215	-1.30661	0.191345	0.311729	3R
ASTEI01879	62.459	0.603129	0.363369	1.65982	0.0969498	0.20472	3R
ASTEI01880	56.3249	0.107416	0.443818	0.242028	0.808758	0.865726	3R
ASTEI01881	118.888	0.185555	0.244043	0.760337	0.447053	0.562621	3R
ASTEI01882	93.4138	-0.131973	0.213333	-0.618623	0.536165	0.641845	3R
ASTEI01883	265.327	-0.114857	0.141979	-0.808975	0.418529	0.536627	3R
ASTEI01884	593.125	1.35072	0.721762	1.87143	0.0612861	0.159062	3R
ASTEI01885	6.22671	0.0935135	0.707626	0.132151	0.894865	0.928188	3R
ASTEI01886	132.076	1.0228	0.261118	3.917	8.96568e-05	0.00375094	3R
ASTEI01887	778.035	-1.16121	0.329245	-3.52688	0.000420489	0.0113213	3R
ASTEI01888	421.094	-0.464289	0.194587	-2.38601	0.0170321	0.0848643	3R
ASTEI01889	672.993	3.34082	0.622538	5.36646	8.02986e-08	1.62157e-05	3R
ASTEI01890	1.0983	1.25335	1.81804	0.689395	0.490575	NA	3R
ASTEI01891	1.74878	0.478187	1.67264	0.285889	0.774963	NA	3R
ASTEI01892	0.539216	-0.0425336	2.52559	-0.016841	0.986563	NA	3R
ASTEI01893	0.447765	0.85042	2.59208	0.328084	0.742848	NA	3R
ASTEI01894	384.286	2.23635	0.363522	6.1519	7.65621e-10	2.87135e-07	3R
ASTEI01895	129.868	-0.401507	0.265797	-1.51058	0.130897	0.245017	3R
ASTEI01896	253.192	1.03213	0.53408	1.93253	0.0532935	0.148208	3R
ASTEI01897	486.388	-0.11122	0.15421	-0.721221	0.470774	0.583178	3R
ASTEI01898	836.284	-0.277945	0.202622	-1.37174	0.170144	0.288583	3R
ASTEI01899	424.509	-0.379192	0.226444	-1.67455	0.0940231	0.201374	3R
ASTEI01900	37.6034	0.271641	0.410043	0.66247	0.50767	0.616163	3R
ASTEI01901	8.8604	1.71979	0.787137	2.18486	0.0288989	0.109447	3R
ASTEI01902	16.8733	0.621757	0.524037	1.18647	0.235435	0.357941	3R
ASTEI01903	38.5994	-0.227849	0.30797	-0.739841	0.459396	0.572936	3R
ASTEI01904	1101.25	0.0444142	0.164227	0.270443	0.786819	0.849818	3R
ASTEI01905	52.6978	0.555454	0.390209	1.42348	0.154598	0.271659	3R
ASTEI01906	1084.81	-0.649488	0.161765	-4.015	5.94464e-05	0.00298683	3R
ASTEI01907	1826.11	-0.288976	0.145993	-1.97937	0.0477739	0.140682	3R
ASTEI01908	366.658	0.826243	0.397705	2.07752	0.0377531	0.123889	3R
ASTEI01909	253.168	-0.112467	0.15526	-0.724376	0.468835	0.581462	3R
ASTEI01910	234.121	-0.254485	0.170139	-1.49575	0.13472	0.249285	3R
ASTEI01911	182.464	1.0055	0.588836	1.7076	0.0877097	0.193496	3R
ASTEI01912	57.058	1.43445	0.762806	1.8805	0.0600403	0.157503	3R
ASTEI01913	0.456967	-1.74477	2.98607	-0.584302	0.559017	NA	3R
ASTEI01914	0.387749	-2.41271	3.04151	-0.79326	0.427626	NA	3R
ASTEI01915	61.5749	-0.623755	0.286569	-2.17663	0.0295082	0.110264	3R
ASTEI01916	67.8464	-0.665813	0.279494	-2.3822	0.0172093	0.0852952	3R
ASTEI01917	143.092	-0.591379	0.246022	-2.40377	0.0162272	0.0828801	3R
ASTEI01918	495.211	-0.192804	0.132986	-1.44981	0.147113	0.262771	3R
ASTEI01919	2.45459	-0.828896	1.04921	-0.790017	0.429518	NA	3R
ASTEI01920	374.166	-0.36233	0.195048	-1.85765	0.0632192	0.1618	3R
ASTEI01921	303.551	0.00911795	0.154825	0.0588919	0.953038	0.967583	3R
ASTEI01922	99.3253	-0.58674	0.290992	-2.01635	0.0437638	0.13375	3R
ASTEI01923	149.852	0.12641	0.203448	0.621341	0.534375	0.640214	3R
ASTEI01924	829.409	-0.319622	0.124779	-2.5615	0.0104221	0.0670604	3R
ASTEI01925	134.126	0.706374	0.220148	3.20863	0.00133368	0.0216795	3R
ASTEI01926	280.824	0.0241291	0.130352	0.185107	0.853145	0.896785	3R
ASTEI01927	64.2547	-0.549919	0.259964	-2.11536	0.0343989	0.118969	3R
ASTEI01928	188.843	0.288552	0.477506	0.60429	0.545651	0.649666	3R
ASTEI01929	66.285	0.881693	0.44203	1.99465	0.0460815	0.137825	3R
ASTEI01930	10.791	-0.706805	0.547718	-1.29045	0.196893	0.318033	3R
ASTEI01931	151.722	0.761212	0.516048	1.47508	0.140191	0.25498	3R
ASTEI01932	68.6865	0.0526492	0.304728	0.172775	0.862829	0.903977	3R
ASTEI01933	563.523	-0.369564	0.191368	-1.93117	0.0534626	0.148416	3R
ASTEI01934	94.2617	-0.248327	0.196854	-1.26148	0.207137	0.327878	3R
ASTEI01935	175.669	-0.424911	0.163493	-2.59895	0.00935095	0.0637938	3R
ASTEI01936	93.7689	-0.225726	0.250581	-0.900814	0.367687	0.487326	3R
ASTEI01937	40.2141	0.919481	0.573603	1.60299	0.108936	0.219524	3R
ASTEI01938	105.748	-1.23621	0.335702	-3.68247	0.000230985	0.00728401	3R
ASTEI01939	219.115	-0.120423	0.183789	-0.655222	0.512325	0.620235	3R
ASTEI01940	481.119	-0.368626	0.188029	-1.96047	0.0499404	0.143744	3R
ASTEI01941	541.504	0.343359	0.138776	2.4742	0.0133536	0.0757981	3R
ASTEI01942	113.915	1.18985	0.662955	1.79476	0.0726913	0.174476	3R
ASTEI01943	29.9722	0.0657547	0.437075	0.150443	0.880415	0.917278	3R
ASTEI01944	677.372	-0.191221	0.264666	-0.722499	0.469988	0.58241	3R
ASTEI01945	822.821	-0.535671	0.191959	-2.79055	0.00526183	0.0478808	3R
ASTEI01946	109.995	0.072948	0.247764	0.294425	0.768433	0.836632	3R
ASTEI01947	197.517	-1.00528	0.255029	-3.94185	8.08553e-05	0.00355256	3R
ASTEI01948	1342.7	-0.152435	0.130364	-1.1693	0.242283	0.365233	3R
ASTEI01949	0.689667	-0.15669	2.43469	-0.0643573	0.948686	NA	3R
ASTEI01950	0.383343	-1.07314	3.20491	-0.334842	0.737744	NA	3R
ASTEI01951	195.885	1.24612	0.542865	2.29545	0.0217076	0.0956171	3R
ASTEI01952	748.771	-0.0438059	0.154252	-0.283989	0.776419	0.842009	3R
ASTEI01953	4192.61	-0.278423	0.16493	-1.68812	0.0913874	0.197746	3R
ASTEI01954	28.4348	1.46315	0.441725	3.31235	0.000925158	0.0178883	3R
ASTEI01955	251.885	0.808279	0.45547	1.7746	0.0759632	0.179135	3R
ASTEI01956	348.634	-0.464768	0.170239	-2.7301	0.00633159	0.0525597	3R
ASTEI01957	85.1356	0.733811	0.362045	2.02685	0.0426778	0.131967	3R
ASTEI01958	301.85	0.676408	0.307157	2.20215	0.0276545	0.107277	3R
ASTEI01959	216.044	-0.317585	0.21281	-1.49234	0.135609	0.250049	3R
ASTEI01960	198.798	-0.483064	0.199178	-2.42529	0.0152961	0.0808032	3R
ASTEI01961	140.302	0.652006	0.52366	1.24509	0.213097	0.334639	3R
ASTEI01962	0.144803	-1.07313	4.40736	-0.243485	0.807629	NA	3R
ASTEI01963	352.289	0.0992666	0.171401	0.579148	0.562489	0.66457	3R
ASTEI01964	6.79988	2.78088	0.845027	3.29087	0.000998767	0.0187287	3R
ASTEI01965	11.2625	1.40095	0.700082	2.00112	0.04538	0.13652	3R
ASTEI01966	6.59928	0.676078	0.844078	0.800966	0.423151	0.540442	3R
ASTEI01967	146.248	0.410745	0.199725	2.05655	0.0397293	0.127117	3R
ASTEI01968	284.149	0.84234	0.451582	1.86531	0.0621382	0.160323	3R
ASTEI01969	492.149	0.522033	0.219528	2.37797	0.017408	0.0857821	3R
ASTEI01970	1307.38	-0.0966606	0.0955102	-1.01204	0.311517	0.434197	3R
ASTEI01971	61.2854	-0.430669	0.245815	-1.75201	0.0797729	0.18438	3R
ASTEI01972	1405.45	0.0791248	0.0999182	0.791895	0.428422	0.545142	3R
ASTEI01973	104.264	0.465594	0.397859	1.17025	0.241901	0.36492	3R
ASTEI01974	9.09254	0.475287	0.799691	0.594337	0.552286	0.65591	3R
ASTEI01975	584.065	-0.165626	0.180003	-0.920128	0.357506	0.476599	3R
ASTEI01976	67.5177	-0.200436	0.304148	-0.659008	0.509891	0.618215	3R
ASTEI01977	337.649	0.111868	0.308178	0.362999	0.716606	0.79345	3R
ASTEI01978	0.385827	0.753488	3.97157	0.18972	0.849528	NA	3R
ASTEI01979	28.3252	1.11625	0.464664	2.40227	0.0162938	0.0831166	3R
ASTEI01980	6.24284	0.0769841	0.657188	0.117142	0.906748	0.93648	3R
ASTEI01981	7.67683	1.57059	0.761982	2.06119	0.0392848	0.126426	3R
ASTEI01982	3.31995	-0.446352	0.99077	-0.450511	0.652342	NA	3R
ASTEI01983	45.6699	0.0458059	0.325559	0.140699	0.888108	0.922981	3R
ASTEI01984	69.3191	1.06832	0.436993	2.4447	0.0144974	0.0787977	3R
ASTEI01985	72.5947	0.359064	0.437992	0.819796	0.412332	0.5303	3R
ASTEI01986	159.403	-0.206717	0.255941	-0.807677	0.419277	0.537257	3R
ASTEI01987	159.479	-0.518105	0.269371	-1.92339	0.0544315	0.149533	3R
ASTEI01988	161.218	-0.170034	0.228846	-0.743005	0.457478	0.571358	3R
ASTEI01989	802.224	-0.0174666	0.119522	-0.146137	0.883813	0.919996	3R
ASTEI01990	53.633	-0.629977	0.359252	-1.75358	0.0795025	0.184114	3R
ASTEI01991	138.88	-0.243235	0.322737	-0.753664	0.451051	0.565889	3R
ASTEI01992	0.654251	0.908762	2.01431	0.451152	0.65188	NA	3R
ASTEI01993	0.154695	-0.111339	4.40736	-0.0252621	0.979846	NA	3R
ASTEI01995	1.29806	-1.04426	1.75566	-0.594799	0.551978	NA	3R
ASTEI01996	294.101	1.01308	0.636469	1.59173	0.111446	0.222701	3R
ASTEI01997	8.52199	0.521021	0.772159	0.674758	0.499829	0.609175	3R
ASTEI01998	78.2133	-0.273367	0.274896	-0.994437	0.32001	0.441924	3R
ASTEI01999	39.6225	1.44052	0.783238	1.83918	0.0658886	0.165063	3R
ASTEI02000	65.3677	1.49276	0.771288	1.93541	0.0529395	0.147537	3R
ASTEI02001	14.6064	1.45145	0.932309	1.55684	0.11951	0.232187	3R
ASTEI02002	5.17938	1.40167	1.06626	1.31456	0.188657	0.308628	3R
ASTEI02003	8.43738	2.12962	0.976625	2.18059	0.0292135	0.109809	3R
ASTEI02004	289.512	1.18292	0.583769	2.02634	0.0427296	0.132088	3R
ASTEI02005	263.579	1.33205	0.52273	2.54825	0.0108266	0.0684586	3R
ASTEI02006	3.02955	-0.115094	0.793787	-0.144993	0.884716	NA	3R
ASTEI02007	42.0507	-1.0264	0.297852	-3.44599	0.000568972	0.0135483	3R
ASTEI02008	269.879	-0.243269	0.257426	-0.945005	0.344656	0.464422	3R
ASTEI02009	35.9615	-0.16227	0.320852	-0.505746	0.613035	0.70913	3R
ASTEI02010	14.8261	-0.343116	0.477794	-0.718126	0.472679	0.584917	3R
ASTEI02011	30.9494	-0.00928649	0.526519	-0.0176375	0.985928	0.990455	3R
ASTEI02012	403.291	0.741657	0.335588	2.21002	0.0271036	0.10623	3R
ASTEI02013	892.602	-0.135728	0.143257	-0.947442	0.343413	0.463163	3R
ASTEI02014	515.855	-0.525387	0.22133	-2.37377	0.0176076	0.0862795	3R
ASTEI02015	208.578	-0.169349	0.158789	-1.0665	0.286196	0.408557	3R
ASTEI02016	231.659	0.0942042	0.159348	0.591184	0.554397	0.657595	3R
ASTEI02017	7.14361	-0.183222	0.587866	-0.311673	0.755289	0.825746	3R
ASTEI02018	437.08	0.32024	0.195442	1.63854	0.101309	0.210454	3R
ASTEI02019	135.304	-0.316736	0.230425	-1.37457	0.169265	0.287566	3R
ASTEI02020	82.7469	0.569072	0.394221	1.44353	0.14887	0.265098	3R
ASTEI02021	195.755	0.20841	0.256423	0.812756	0.416358	0.534248	3R
ASTEI02022	292.131	-0.513805	0.19615	-2.61945	0.00880729	0.061946	3R
ASTEI02023	293.027	0.976271	0.499541	1.95434	0.0506613	0.144446	3R
ASTEI02024	3119.87	-0.504832	0.149987	-3.36583	0.000763141	0.0160045	3R
ASTEI02025	3365.35	-0.256201	0.157672	-1.6249	0.104184	0.213305	3R
ASTEI02026	83.3695	3.92638	0.563287	6.97048	3.15866e-12	2.44857e-09	3R
ASTEI02027	200.994	0.750471	0.439162	1.70887	0.087475	0.19318	3R
ASTEI02028	171.944	1.46781	0.432115	3.39681	0.000681756	0.0151036	3R
[truncated: 9,633 more rows]

## Sheet: 3_nGuy1_1-TM vs WM
Gene	baseMean	log2FoldChange	lfcSE	stat	pvalue	padj	Chromosome
ASTEI00001	129.129	0.760973	0.254632	2.98852	0.00280328	0.0171506	2R
ASTEI00002	871.848	0.590971	0.222926	2.65097	0.00802603	0.0406207	2R
ASTEI000020	298.369	-1.06394	0.202598	-5.25149	1.5087e-07	3.26474e-06	2R
ASTEI00003	256.557	0.20773	0.235852	0.880766	0.378445	0.664317	2R
ASTEI00004	28.5931	0.808069	0.583833	1.38408	0.166335	0.398903	2R
ASTEI00005	439.324	0.377875	0.215843	1.75069	0.0799992	0.238566	2R
ASTEI00006	145.924	0.241779	0.218683	1.10562	0.268892	0.545244	2R
ASTEI00008	319.742	0.0893413	0.15481	0.577103	0.56387	0.813293	2R
ASTEI00009	108.897	0.0612023	0.193423	0.316416	0.751687	0.91392	2R
ASTEI00010	20.6205	0.0419557	0.569688	0.0736468	0.941291	0.983102	2R
ASTEI00012	18.8617	0.811191	0.461864	1.75634	0.0790301	0.236743	2R
ASTEI00013	609.185	-0.896388	0.212794	-4.21247	2.52595e-05	0.000308085	2R
ASTEI00014	227.625	0.75953	0.185207	4.10097	4.11424e-05	0.000472971	2R
ASTEI00015	108.878	-0.288822	0.426234	-0.677613	0.498017	0.766825	2R
ASTEI00016	632.408	-0.3369	0.165372	-2.03722	0.0416276	0.149143	2R
ASTEI00017	35.044	0.662627	0.378852	1.74904	0.0802842	0.238987	2R
ASTEI00018	223.316	0.467441	0.207099	2.25709	0.0240022	0.0972364	2R
ASTEI00019	409.451	0.0265896	0.15443	0.172178	0.863297	0.958347	2R
ASTEI00020	131.054	0.630599	0.209449	3.01075	0.00260601	0.0161341	2R
ASTEI00021	108.181	0.152937	0.313854	0.487286	0.626056	0.849866	2R
ASTEI00022	82.2352	0.50124	0.250183	2.00349	0.0451246	0.159122	2R
ASTEI00023	182.114	0.0414922	0.159772	0.259697	0.795097	0.932784	2R
ASTEI00024	30.2934	0.166454	0.4567	0.364472	0.715506	0.89492	2R
ASTEI00025	139.667	0.200985	0.597854	0.336178	0.736737	0.905405	2R
ASTEI00026	0.175297	-0.216132	4.40746	-0.0490377	0.960889	NA	2R
ASTEI00027	0.991605	0.408754	1.69359	0.241353	0.809281	0.939725	2R
ASTEI00028	2.31288	0.629036	1.07092	0.58738	0.556949	0.808702	2R
ASTEI00029	5.46269	-0.975253	0.732019	-1.33228	0.182769	0.42641	2R
ASTEI00030	445.75	-0.459738	0.274528	-1.67465	0.094003	0.266736	2R
ASTEI00031	522.336	-0.145698	0.15364	-0.948305	0.342974	0.629228	2R
ASTEI00032	112.35	0.0652051	0.316314	0.20614	0.836681	0.950291	2R
ASTEI00033	554.117	0.586927	0.209908	2.79612	0.00517209	0.0284665	2R
ASTEI00034	300.334	0.00829177	0.173967	0.047663	0.961985	0.988161	2R
ASTEI00035	323.422	-0.178187	0.140862	-1.26498	0.205879	0.461811	2R
ASTEI00036	559.712	0.585083	0.321151	1.82183	0.0684802	0.21437	2R
ASTEI00037	198.141	0.388578	0.216456	1.79518	0.0726243	0.222876	2R
ASTEI00038	401.927	0.274278	0.686958	0.399265	0.689698	0.883743	2R
ASTEI00039	271.689	-0.0937762	0.464679	-0.201809	0.840066	0.951215	2R
ASTEI00040	141.43	0.183824	0.42849	0.429005	0.66792	0.875009	2R
ASTEI00041	162.073	0.570661	0.176769	3.22829	0.00124533	0.00861234	2R
ASTEI00042	695.927	0.275673	0.47084	0.585492	0.558217	0.809088	2R
ASTEI00043	1.81405	1.09278	1.41162	0.774129	0.438855	0.721363	2R
ASTEI00044	9.26864	0.815955	0.569078	1.43382	0.151624	0.37577	2R
ASTEI00045	280.228	-0.673387	0.454033	-1.48312	0.138042	0.350764	2R
ASTEI00046	1032.71	0.0049061	0.126296	0.0388459	0.969013	0.98971	2R
ASTEI00047	483.862	-0.0792569	0.196138	-0.404087	0.686148	0.882601	2R
ASTEI00048	911.611	-0.104818	0.12115	-0.865191	0.386934	0.673678	2R
ASTEI00049	505.064	-0.408013	0.176941	-2.30593	0.0211146	0.087848	2R
ASTEI00050	140.947	0.243958	0.200402	1.21734	0.223474	0.486541	2R
ASTEI00052	95.7979	0.0271538	0.825162	0.0329072	0.973749	0.991662	2R
ASTEI00053	66.1747	0.100162	0.528388	0.189562	0.849653	0.952747	2R
ASTEI00054	440.407	-0.319658	0.245503	-1.30205	0.192899	0.442217	2R
ASTEI00055	861.06	0.269767	0.131862	2.04584	0.0407726	0.146771	2R
ASTEI00056	292.648	0.37293	0.489379	0.762047	0.446032	0.727397	2R
ASTEI00057	489.252	0.399664	0.206105	1.93913	0.0524854	0.178457	2R
ASTEI00058	473.705	-0.188537	0.143605	-1.31289	0.189221	0.437082	2R
ASTEI00059	1221.3	-0.284182	0.302489	-0.939478	0.347486	0.633935	2R
ASTEI00060	2958.35	-0.282049	0.170231	-1.65685	0.0975488	0.274272	2R
ASTEI00061	76.3092	-0.857047	0.263058	-3.25802	0.00112193	0.0079076	2R
ASTEI00062	96.5457	0.562698	0.281669	1.99773	0.0457462	0.160569	2R
ASTEI00063	41.3629	0.287851	0.28693	1.00321	0.31576	0.600755	2R
ASTEI00064	33.4168	0.465131	0.56631	0.821336	0.411455	0.696694	2R
ASTEI00065	16.9797	0.0487474	0.728315	0.0669317	0.946636	0.983999	2R
ASTEI00066	303.659	0.145588	0.64756	0.224826	0.822115	0.944915	2R
ASTEI00067	201.049	0.145243	0.248352	0.584829	0.558663	0.809323	2R
ASTEI00068	216.004	-0.186863	0.438759	-0.425889	0.670189	0.875734	2R
ASTEI00069	1.06771	0.987482	1.48864	0.663347	0.507108	0.773964	2R
ASTEI00070	1.245	4.69725	2.06481	2.27491	0.0229115	0.0937168	2R
ASTEI00071	2.52579	1.95406	1.45045	1.34721	0.177912	0.418073	2R
ASTEI00072	296.212	0.171154	0.208868	0.819438	0.412537	0.697746	2R
ASTEI00073	1.37261	2.84009	1.62353	1.74933	0.0802339	0.238958	2R
ASTEI00074	347.996	0.535035	0.137709	3.88525	0.000102225	0.00103165	2R
ASTEI00075	332.934	0.234535	0.149626	1.56747	0.117004	0.313219	2R
ASTEI00076	5.52076	1.16846	0.644398	1.81326	0.0697914	0.217223	2R
ASTEI00077	13.1695	-0.525852	0.517868	-1.01542	0.309907	0.593581	2R
ASTEI00078	50.5675	-0.19544	0.305019	-0.640748	0.521686	0.783113	2R
ASTEI00079	388.289	-0.483541	0.126309	-3.82825	0.000129058	0.00126895	2R
ASTEI00080	206.067	0.387812	0.192163	2.01814	0.0435762	0.154744	2R
ASTEI00081	25.3917	0.495354	0.403705	1.22702	0.219815	0.480594	2R
ASTEI00082	44.2415	0.494486	0.3911	1.26435	0.206105	0.462045	2R
ASTEI00083	169.898	0.379458	0.247988	1.53014	0.125981	0.328161	2R
ASTEI00084	46.3292	-0.198683	0.268253	-0.740656	0.458902	0.73619	2R
ASTEI00085	234.117	-1.3181	0.272675	-4.83395	1.33851e-06	2.29885e-05	2R
ASTEI00086	969.052	-0.630531	0.205547	-3.06758	0.00215801	0.0137794	2R
ASTEI00087	668.318	-0.207969	0.216331	-0.961345	0.336379	0.621527	2R
ASTEI00088	936.665	0.177037	0.186904	0.947208	0.343533	0.629948	2R
ASTEI00089	1094.28	-0.483637	0.169881	-2.84691	0.00441453	0.0250091	2R
ASTEI00090	1152.89	-0.240215	0.169487	-1.41731	0.156394	0.383304	2R
ASTEI00091	167.32	-0.236036	0.153344	-1.53926	0.123742	0.324104	2R
ASTEI00092	479.386	-0.235419	0.69487	-0.338795	0.734764	0.904203	2R
ASTEI00093	156.831	-0.0946884	0.239231	-0.395803	0.69225	0.884847	2R
ASTEI00094	159.584	0.336688	0.253766	1.32676	0.184587	0.429159	2R
ASTEI00095	68.0265	0.655182	0.548047	1.19548	0.231898	0.497941	2R
ASTEI00096	53.7601	0.936416	0.51027	1.83514	0.0664852	0.209969	2R
ASTEI00097	54.3705	-0.0151434	0.268662	-0.0563661	0.95505	0.986234	2R
ASTEI00098	90.9434	-0.0519231	0.283092	-0.183414	0.854473	0.954399	2R
ASTEI00099	982.313	0.628917	0.614736	1.02307	0.306275	0.590193	2R
ASTEI00100	277.972	-0.866464	0.417374	-2.07599	0.037895	0.13927	2R
ASTEI00101	0.169555	-0.216132	4.40746	-0.0490377	0.960889	NA	2R
ASTEI00102	2.44854	-0.871642	0.953673	-0.913984	0.360725	0.647429	2R
ASTEI00103	185.358	1.27624	0.495172	2.57737	0.00995559	0.0483327	2R
ASTEI00104	174.072	0.22019	0.217216	1.01369	0.310731	0.59446	2R
ASTEI00105	27.0746	-0.00159391	0.623424	-0.00255671	0.99796	0.999274	2R
ASTEI00107	426.789	0.188508	0.814394	0.23147	0.81695	0.942973	2R
ASTEI00108	1.58271	-0.609094	1.39903	-0.435368	0.663295	0.872344	2R
ASTEI00109	134.457	0.906239	0.345849	2.62033	0.00878438	0.0436311	2R
ASTEI00110	233.133	0.517748	0.271754	1.90521	0.0567525	0.188251	2R
ASTEI00111	128.927	-0.592314	0.260452	-2.27418	0.0229553	0.0938287	2R
ASTEI00112	136.966	0.126236	0.604436	0.208849	0.834566	0.950031	2R
ASTEI00113	994.934	-1.08016	0.165581	-6.5235	6.86871e-11	2.97836e-09	2R
ASTEI00114	311.129	1.31952	0.19182	6.87894	6.02983e-12	3.16885e-10	2R
ASTEI00115	83.4632	-0.697267	0.358185	-1.94667	0.0515745	0.176359	2R
ASTEI00116	8.45896	2.75443	0.749993	3.6726	0.000240091	0.0021576	2R
ASTEI00117	251.975	-0.126878	0.337225	-0.376242	0.706737	0.890962	2R
ASTEI00118	147.956	0.135777	0.219327	0.619061	0.535876	0.793653	2R
ASTEI00119	35.9972	0.494122	0.353204	1.39897	0.161822	0.392059	2R
ASTEI00120	698.735	-0.210191	0.130838	-1.6065	0.108165	0.296517	2R
ASTEI00121	4187.29	-0.0396471	0.10866	-0.364872	0.715207	0.89492	2R
ASTEI00122	289.575	-0.73824	0.166385	-4.43693	9.12509e-06	0.000125077	2R
ASTEI00123	480.158	-0.110399	0.27199	-0.405895	0.68482	0.882146	2R
ASTEI00124	66.4338	0.485551	0.331812	1.46333	0.143376	0.361339	2R
ASTEI00125	842.358	-0.383555	0.11827	-3.24304	0.00118262	0.00824321	2R
ASTEI00126	72.4654	0.441198	0.289032	1.52647	0.126894	0.329791	2R
ASTEI00127	437.568	0.45591	0.155826	2.92576	0.00343615	0.0203246	2R
ASTEI00128	1823.51	-0.469175	0.170464	-2.75235	0.00591694	0.0319039	2R
ASTEI00129	118.501	0.533904	0.363884	1.46724	0.142311	0.35953	2R
ASTEI00130	112.905	0.382782	0.198318	1.93014	0.0535891	0.181183	2R
ASTEI00131	19.2375	0.372085	0.413531	0.899775	0.36824	0.654623	2R
ASTEI00132	687.012	-0.509822	0.141022	-3.61519	0.00030013	0.00261473	2R
ASTEI00133	0.834163	2.92276	2.2371	1.3065	0.191384	0.439991	2R
ASTEI00135	1.06454	1.56596	1.51809	1.03154	0.302289	0.58468	2R
ASTEI00136	19.4252	0.0849804	0.404393	0.210143	0.833556	0.949734	2R
ASTEI00137	47.299	-0.0144446	0.334725	-0.0431535	0.965579	0.988373	2R
ASTEI00138	221.298	0.437584	0.278051	1.57375	0.115545	0.310625	2R
ASTEI00139	100.069	-4.1218	0.536406	-7.68411	1.54061e-14	1.17914e-12	2R
ASTEI00140	351.121	0.252884	0.370935	0.681748	0.495398	0.765551	2R
ASTEI00141	351.152	-0.794837	0.215045	-3.69614	0.000218898	0.00200992	2R
ASTEI00142	205.456	-0.455744	0.388209	-1.17396	0.240409	0.509596	2R
ASTEI00143	1235.27	-0.288298	0.165361	-1.74344	0.0812566	0.240751	2R
ASTEI00144	30.316	-0.041243	0.565075	-0.0729867	0.941817	0.98311	2R
ASTEI00145	11.7511	-0.123007	0.760446	-0.161756	0.871498	0.961351	2R
ASTEI00146	18.775	0.340386	0.46806	0.727226	0.467088	0.742703	2R
ASTEI00147	17.4734	0.00106106	0.557239	0.00190413	0.998481	0.999318	2R
ASTEI00148	16.6744	0.12189	0.600664	0.202926	0.839193	0.950923	2R
ASTEI00149	712.226	-1.77783	0.391351	-4.54281	5.55096e-06	8.1054e-05	2R
ASTEI00150	3350.41	-0.579225	0.189164	-3.06202	0.00219849	0.0139908	2R
ASTEI00151	142.025	0.325264	0.179742	1.80961	0.0703556	0.218144	2R
ASTEI00152	285.579	0.331255	0.239874	1.38096	0.167292	0.400714	2R
ASTEI00153	38.1407	-0.0970231	0.345387	-0.280911	0.778778	0.925383	2R
ASTEI00154	506.831	-0.688432	0.183294	-3.75589	0.000172727	0.00163331	2R
ASTEI00155	96.461	1.3497	0.2458	5.49108	3.99494e-08	9.92555e-07	2R
ASTEI00156	108.669	0.331113	0.220939	1.49866	0.133962	0.343072	2R
ASTEI00157	92.7525	-0.229083	0.579738	-0.395148	0.692733	0.885047	2R
ASTEI00158	11.8197	0.312897	0.618397	0.505981	0.61287	0.84386	2R
ASTEI00159	115.205	-0.180692	0.394385	-0.458161	0.646836	0.862449	2R
ASTEI00160	92.585	0.704251	0.274638	2.56429	0.0103387	0.049895	2R
ASTEI00161	242.382	-0.596859	0.277542	-2.15051	0.0315145	0.121211	2R
ASTEI00162	1051.35	-0.0288821	0.151348	-0.190833	0.848657	0.952492	2R
ASTEI00163	41.6246	0.590526	0.322146	1.8331	0.0667873	0.210631	2R
ASTEI00164	171.782	0.154974	0.419246	0.369648	0.711645	0.893099	2R
ASTEI00165	417.425	0.701016	0.375807	1.86536	0.062131	0.200154	2R
ASTEI00166	513.383	0.141139	0.208108	0.6782	0.497645	0.766825	2R
ASTEI00167	260.549	-0.160457	0.422429	-0.379845	0.70406	0.889553	2R
ASTEI00168	756.295	2.10496	0.40881	5.14898	2.619e-07	5.35252e-06	2R
ASTEI00169	123.851	-0.232295	0.274012	-0.847757	0.396573	0.681821	2R
ASTEI00170	15.1204	0.368484	0.54022	0.682101	0.495175	0.765544	2R
ASTEI00171	2.91243	2.16048	0.995327	2.17062	0.0299598	0.116688	2R
ASTEI00172	91.9163	0.48331	0.233186	2.07263	0.0382065	0.140009	2R
ASTEI00173	58.5293	0.23026	0.573097	0.401782	0.687845	0.883203	2R
ASTEI00174	0.448169	2.17779	3.82	0.570104	0.568607	0.817086	2R
ASTEI00175	422.543	-0.0506928	0.254085	-0.199511	0.841863	0.951509	2R
ASTEI00176	927.431	-0.249235	0.165071	-1.50987	0.131076	0.338036	2R
ASTEI00177	89.1726	0.100842	0.548865	0.183728	0.854227	0.954399	2R
ASTEI00178	3.56788	-0.370083	1.18501	-0.312303	0.754811	0.915551	2R
ASTEI00179	113.554	-0.655836	0.215071	-3.04939	0.00229307	0.0144877	2R
ASTEI00180	180.171	-0.106017	0.281962	-0.375998	0.706918	0.891022	2R
ASTEI00181	892.704	-0.328671	0.140026	-2.34722	0.018914	0.0806036	2R
ASTEI00182	173.226	-1.35538	0.328445	-4.12667	3.68056e-05	0.000428734	2R
ASTEI00183	280.001	-0.380182	0.270952	-1.40313	0.160577	0.390286	2R
ASTEI00184	96.2649	0.396089	0.267782	1.47915	0.139101	0.352748	2R
ASTEI00185	2734.21	-0.335825	0.157442	-2.13301	0.0329239	0.125405	2R
ASTEI00186	89.8603	0.255949	0.344158	0.743697	0.45706	0.734439	2R
ASTEI00187	198.17	-0.331106	0.26805	-1.23524	0.21674	0.476519	2R
ASTEI00188	5.54455	0.37376	0.623594	0.599364	0.54893	0.803801	2R
ASTEI00189	177.274	0.878124	0.312619	2.80893	0.00497071	0.0275442	2R
ASTEI00190	2.836	1.38372	0.991275	1.3959	0.162746	0.393378	2R
ASTEI00191	11.2001	1.00304	0.547115	1.83333	0.0667535	0.210583	2R
ASTEI00192	2.37097	1.3475	1.30608	1.03171	0.302207	0.584626	2R
ASTEI00193	292.447	0.201965	0.24111	0.837647	0.402229	0.687728	2R
ASTEI00194	72.0184	-0.14698	0.208763	-0.704052	0.481401	0.75469	2R
ASTEI00195	29.693	1.78482	0.367599	4.85535	1.20173e-06	2.09229e-05	2R
ASTEI00196	11.2457	1.31704	0.614713	2.14252	0.0321515	0.122915	2R
ASTEI00197	3150.81	-0.607823	0.176308	-3.44751	0.00056577	0.00447748	2R
ASTEI00198	41.7892	0.00950533	0.27066	0.0351191	0.971985	0.990965	2R
ASTEI00199	187.327	-0.834402	0.284689	-2.93093	0.00337949	0.0200206	2R
ASTEI00200	407.678	-0.558902	0.740213	-0.755055	0.450216	0.729157	2R
ASTEI00201	68.3465	1.32967	0.26566	5.00514	5.58204e-07	1.05919e-05	2R
ASTEI00202	7.55612	0.422763	0.591307	0.714964	0.474631	0.75072	2R
ASTEI00203	419.077	0.32316	0.224746	1.43789	0.150465	0.373537	2R
ASTEI00204	46.1558	0.127382	0.59972	0.212402	0.831793	0.949324	2R
ASTEI00205	12.1962	0.266872	0.715988	0.372733	0.709347	0.892476	2R
ASTEI00206	10.4621	0.585435	0.861402	0.679631	0.496738	0.766419	2R
ASTEI00207	1.64365	-0.836546	1.2774	-0.654883	0.512543	0.777956	2R
ASTEI00208	0.561138	-0.113991	2.52552	-0.0451358	0.963999	0.98829	2R
ASTEI00209	182.288	-0.764919	0.229859	-3.32777	0.000875435	0.00641199	2R
ASTEI00210	392.604	0.0200811	0.216466	0.0927677	0.926088	0.978651	2R
ASTEI00211	264.397	0.515036	0.300918	1.71155	0.0869801	0.252119	2R
ASTEI00212	2671.12	-0.0972098	0.141704	-0.686004	0.492711	0.76416	2R
ASTEI00213	174.875	0.852132	0.258071	3.30193	0.000960225	0.00693197	2R
ASTEI00214	1009.25	-0.834938	0.192011	-4.34838	1.3715e-05	0.000179364	2R
ASTEI00215	175.078	0.535696	0.260902	2.05324	0.040049	0.144898	2R
ASTEI00216	169.479	0.512667	0.285534	1.79547	0.0725796	0.222799	2R
ASTEI00217	141.629	0.623156	0.569784	1.09367	0.274099	0.552461	2R
ASTEI00218	148.424	-0.0748173	0.190142	-0.393481	0.693965	0.885331	2R
ASTEI002180	75.5142	0.401208	0.289078	1.38789	0.165171	0.397178	2R
ASTEI002184	2.18729	0.415318	1.02912	0.403566	0.686532	0.882801	2R
ASTEI00219	240.879	0.333553	0.159271	2.09425	0.0362377	0.134742	2R
ASTEI00220	132.987	0.116161	0.242426	0.47916	0.631825	0.852273	2R
ASTEI00221	188.439	0.465377	0.194189	2.39652	0.0165517	0.0725981	2R
ASTEI00222	2965.54	-0.206589	0.0974722	-2.11947	0.034051	0.128582	2R
ASTEI00224	1084.1	-0.307997	0.192309	-1.60157	0.10925	0.298845	2R
ASTEI00225	3.27139	1.16042	0.930155	1.24755	0.212195	0.469968	2R
ASTEI00227	41.5671	-0.521859	0.301327	-1.73187	0.0832967	0.244971	2R
ASTEI00228	221.494	-0.26021	0.239186	-1.0879	0.27664	0.555283	2R
ASTEI00229	17.3369	-0.503113	0.481704	-1.04444	0.29628	0.578067	2R
ASTEI00230	230.681	-0.0162212	0.250668	-0.0647118	0.948403	0.98408	2R
ASTEI00231	598.455	0.148627	0.197281	0.75338	0.451222	0.729787	2R
ASTEI00232	525.553	-0.341064	0.187104	-1.82285	0.0683254	0.214049	2R
ASTEI00233	471.744	-0.282459	0.570028	-0.495518	0.620235	0.847389	2R
ASTEI00234	610.208	-0.808021	0.173403	-4.65978	3.16552e-06	4.88492e-05	2R
ASTEI00235	345.16	-0.698768	0.373996	-1.86838	0.0617086	0.19919	2R
ASTEI00236	282.234	0.345153	0.199477	1.73029	0.0835788	0.245336	2R
ASTEI00237	63.1735	-0.260579	0.398511	-0.653881	0.513189	0.778287	2R
ASTEI00238	845.812	-0.406888	0.149157	-2.72791	0.00637376	0.0339973	2R
ASTEI00239	111.301	0.329096	0.269317	1.22196	0.221721	0.483483	2R
ASTEI00240	226.706	-0.114494	0.252116	-0.454134	0.649732	0.864188	2R
ASTEI00241	324.333	0.242155	0.266825	0.907542	0.36412	0.650646	2R
ASTEI00242	168.463	-0.124417	0.238793	-0.521025	0.602349	0.8374	2R
ASTEI00243	308.945	-0.225357	0.20831	-1.08183	0.279327	0.558262	2R
ASTEI00244	2.71187	0.235531	1.19252	0.197507	0.843431	0.951666	2R
ASTEI00245	0.801194	1.67212	1.77252	0.943358	0.345498	0.631723	2R
ASTEI00246	8.8613	0.0540819	0.640129	0.0844859	0.93267	0.979853	2R
ASTEI00247	71.5335	0.0640685	0.727987	0.0880078	0.92987	0.979707	2R
ASTEI00248	61.9525	0.121498	0.63038	0.192737	0.847165	0.951829	2R
ASTEI00249	111.082	0.589233	0.19214	3.06669	0.00216444	0.0138127	2R
ASTEI00250	448.867	0.318317	0.243675	1.30632	0.191445	0.439991	2R
ASTEI00251	103.938	0.822074	0.201756	4.0746	4.60938e-05	0.00052356	2R
ASTEI00252	99.482	-0.134759	0.286357	-0.470599	0.637927	0.857184	2R
ASTEI00253	440.54	-0.565693	0.149803	-3.77624	0.000159212	0.0015232	2R
ASTEI00254	55.4425	-0.215815	0.286416	-0.753504	0.451147	0.729787	2R
ASTEI00255	933.922	-0.325045	0.162465	-2.00071	0.0454241	0.159882	2R
ASTEI00256	462.651	-0.833867	0.587268	-1.41991	0.155634	0.381936	2R
ASTEI00257	20.8134	0.124513	0.464037	0.268324	0.78845	0.930121	2R
ASTEI00258	352.095	0.512457	0.624102	0.821111	0.411583	0.696807	2R
ASTEI00259	90.5894	-0.423768	0.67221	-0.63041	0.528426	0.788147	2R
ASTEI00260	175.303	-0.413699	0.73401	-0.563615	0.573016	0.819847	2R
ASTEI00261	335.729	-0.384722	0.780226	-0.493091	0.621948	0.84856	2R
ASTEI00262	127.977	-0.597233	0.803915	-0.742906	0.457538	0.734793	2R
ASTEI00263	240.227	0.109271	0.454099	0.240633	0.80984	0.939894	2R
ASTEI00264	239.046	0.375954	0.457033	0.822596	0.410738	0.695892	2R
ASTEI00265	156.993	-0.474207	0.241691	-1.96204	0.049758	0.171277	2R
ASTEI00266	191.234	0.0739539	0.199996	0.369776	0.711549	0.893078	2R
ASTEI00267	448.518	0.0748682	0.149321	0.501392	0.616095	0.844987	2R
ASTEI00268	421.884	-0.563203	0.367197	-1.53379	0.125081	0.32647	2R
ASTEI00269	124.69	-0.308589	0.319353	-0.966294	0.333897	0.619144	2R
ASTEI00270	2.10059	0.127253	1.17703	0.108113	0.913906	0.97481	2R
ASTEI00271	1910.34	-0.769829	0.186654	-4.12435	3.71779e-05	0.000432629	2R
ASTEI00272	129.877	0.248789	0.267354	0.930558	0.352082	0.639253	2R
ASTEI00273	88.7098	0.641311	0.326142	1.96635	0.0492577	0.170017	2R
ASTEI00274	181.787	-0.381641	0.20151	-1.89391	0.0582368	0.191613	2R
ASTEI00275	737.835	-0.169292	0.171372	-0.987863	0.32322	0.60911	2R
ASTEI00276	93.7572	0.113071	0.413193	0.273653	0.784352	0.927878	2R
ASTEI00277	359.277	0.532478	0.206547	2.578	0.00993745	0.0482858	2R
ASTEI00278	417.668	-0.634778	0.216446	-2.93274	0.00335989	0.0199252	2R
ASTEI00279	4.50437	-0.540559	0.864439	-0.625329	0.531755	0.790631	2R
ASTEI00280	0.297251	1.66844	4.15532	0.40152	0.688037	0.883203	2R
ASTEI00281	21.9291	0.298929	0.422695	0.707197	0.479444	0.754057	2R
ASTEI00282	24.14	-0.547246	0.517556	-1.05737	0.290345	0.571371	2R
ASTEI00283	275.893	0.278634	0.156411	1.78142	0.0748443	0.22852	2R
ASTEI00284	591.394	-0.498334	0.424749	-1.17324	0.240698	0.510019	2R
ASTEI00285	19.6982	1.63379	0.424925	3.84489	0.000120606	0.00120016	2R
ASTEI00286	183.226	0.490711	0.349412	1.40439	0.160203	0.389874	2R
ASTEI00287	11.9048	-0.185131	0.584794	-0.316575	0.751566	0.91392	2R
ASTEI00288	202.771	0.499502	0.231515	2.15754	0.0309637	0.119578	2R
ASTEI00289	1350.95	-0.636703	0.156585	-4.06618	4.77907e-05	0.000540143	2R
ASTEI00290	90.7887	-0.061246	0.546945	-0.111978	0.910841	0.974686	2R
ASTEI00291	123.71	0.182154	0.287391	0.633819	0.526199	0.786883	2R
ASTEI00292	583.9	-0.330037	0.189277	-1.74367	0.0812169	0.240696	2R
ASTEI00293	10.706	0.843364	0.600647	1.40409	0.160291	0.389939	2R
ASTEI00294	40.8833	0.242241	0.672405	0.360261	0.718652	0.896583	2R
ASTEI00296	195.739	0.299325	0.534762	0.559735	0.57566	0.821349	2R
ASTEI00297	363.262	0.184066	0.207984	0.885001	0.376156	0.661784	2R
ASTEI00298	135.644	-0.0568326	0.230897	-0.246138	0.805575	0.937575	2R
ASTEI00299	2092.02	-1.34914	0.206897	-6.52082	6.99237e-11	3.02049e-09	2R
ASTEI00300	116.44	1.60217	0.232132	6.90196	5.12898e-12	2.75901e-10	2R
ASTEI00301	350.546	-0.438655	0.248966	-1.76191	0.0780851	0.234831	2R
ASTEI00302	108.742	-0.130607	0.188109	-0.694316	0.487484	0.759964	2R
ASTEI00303	193.643	2.7277	0.25304	10.7797	4.29241e-27	2.07843e-24	2R
ASTEI00304	49.1734	-0.20062	0.575184	-0.348793	0.727244	0.900317	2R
ASTEI00305	32.8809	-0.454323	0.648289	-0.700804	0.483425	0.756514	2R
ASTEI00306	583.4	0.182461	0.227345	0.802573	0.422222	0.705881	2R
ASTEI00309	22.4834	2.26649	0.477699	4.74459	2.08927e-06	3.35578e-05	2R
ASTEI00310	24.1272	0.542911	0.431457	1.25832	0.208276	0.465721	2R
ASTEI00311	107.258	-0.184736	0.24162	-0.764573	0.444526	0.725778	2R
ASTEI00312	421.992	0.286	0.239591	1.1937	0.232596	0.498984	2R
ASTEI00313	51.7823	0.320656	0.266865	1.20156	0.229533	0.495179	2R
ASTEI00314	85.6263	0.801149	0.280041	2.86083	0.00422539	0.0241294	2R
ASTEI00315	143.817	0.968978	0.160718	6.02906	1.64919e-09	5.49923e-08	2R
ASTEI00316	270.744	0.371549	0.231814	1.60279	0.108981	0.298252	2R
ASTEI00317	120.315	0.594877	0.315235	1.88709	0.0591482	0.193662	2R
ASTEI00318	162.258	-0.230124	0.273901	-0.840173	0.400811	0.686623	2R
ASTEI00319	128.042	0.312955	0.323588	0.96714	0.333474	0.619144	2R
ASTEI00320	163.531	-0.192186	0.631647	-0.304262	0.760928	0.918265	2R
ASTEI00321	766.988	0.308129	0.577795	0.533285	0.593837	0.833673	2R
ASTEI00322	261.044	0.990916	0.287624	3.44518	0.000570677	0.00451005	2R
ASTEI00323	328.121	0.182208	0.168249	1.08297	0.278823	0.557743	2R
ASTEI00324	66.1116	0.771666	0.425195	1.81485	0.0695468	0.216697	2R
ASTEI00325	287.717	0.395562	0.212037	1.86554	0.0621062	0.200154	2R
ASTEI00326	25.2627	-0.84656	0.55031	-1.53833	0.123967	0.324306	2R
ASTEI00327	500.072	0.30126	0.189587	1.58903	0.112053	0.304124	2R
ASTEI00328	9.21172	0.20671	0.546421	0.378298	0.705209	0.890467	2R
ASTEI00329	270.189	0.144163	0.395797	0.364235	0.715683	0.89492	2R
ASTEI00330	97.0516	0.727047	0.268507	2.70774	0.00677425	0.0356829	2R
ASTEI00331	519.535	-0.876362	0.566696	-1.54644	0.121998	0.321382	2R
ASTEI00332	133.134	-0.643426	0.180175	-3.57112	0.000355454	0.00300999	2R
ASTEI00333	3.23369	0.621323	1.09878	0.565467	0.571756	0.819341	2R
ASTEI00334	111.935	-0.202635	0.267311	-0.758049	0.448422	0.728358	2R
ASTEI00335	235.164	0.264743	0.335569	0.788939	0.430148	0.714553	2R
ASTEI00336	333.469	-0.133442	0.371187	-0.3595	0.719221	0.896981	2R
ASTEI00337	402.129	0.147291	0.238991	0.616302	0.537695	0.794902	2R
ASTEI00338	182.423	0.440429	0.215575	2.04304	0.0410485	0.147485	2R
ASTEI00339	221.912	0.856498	0.216793	3.95077	7.79006e-05	0.000821811	2R
ASTEI00340	126.756	0.631164	0.251784	2.50677	0.0121839	0.0569449	2R
ASTEI00341	177.338	0.24547	0.401478	0.611417	0.540924	0.797813	2R
ASTEI00342	70.3981	0.23197	0.582698	0.398096	0.69056	0.88423	2R
ASTEI00343	136.546	0.149455	0.20466	0.730258	0.465233	0.7412	2R
ASTEI00344	4.3345	-0.121353	0.785006	-0.154589	0.877146	0.96393	2R
ASTEI00345	299.9	-0.250194	0.194542	-1.28606	0.198421	0.451024	2R
ASTEI00346	64.3104	0.576823	0.305599	1.88752	0.0590905	0.193585	2R
ASTEI00347	99.6125	11.103	1.19806	9.26752	1.90521e-20	3.87983e-18	2R
ASTEI00348	0.55527	2.22512	2.51941	0.883192	0.377133	0.662786	2R
ASTEI00349	0.386853	0.644225	2.61982	0.245905	0.805756	0.937575	2R
ASTEI00350	52.569	0.0680137	0.467425	0.145507	0.88431	0.967819	2R
ASTEI00351	353.684	0.1157	0.205229	0.563763	0.572915	0.819847	2R
ASTEI00352	91.3052	0.0901743	0.27213	0.331364	0.740369	0.907478	2R
ASTEI003524	236.574	-0.476045	0.267303	-1.78092	0.0749262	0.228709	2R
ASTEI003525	219.87	-0.570168	0.274973	-2.07354	0.0381221	0.139789	2R
ASTEI003526	208.182	-0.652492	0.292455	-2.23109	0.0256753	0.102701	2R
ASTEI003527	297.159	-0.703873	0.254427	-2.7665	0.00566613	0.0307049	2R
ASTEI00353	353.338	-0.101893	0.213645	-0.476927	0.633414	0.853433	2R
ASTEI00354	637.64	0.41391	0.238179	1.73781	0.0822443	0.243011	2R
ASTEI00355	241.65	-0.595024	0.269278	-2.2097	0.0271258	0.107411	2R
ASTEI00356	155.739	-0.721153	0.287077	-2.51206	0.0120029	0.0562373	2R
ASTEI00357	264.614	-0.69931	0.244727	-2.85752	0.00426972	0.0243216	2R
ASTEI00362	66.2121	-0.267208	0.212633	-1.25666	0.208876	0.466652	2R
ASTEI00363	11.8552	0.403515	0.503854	0.800857	0.423214	0.706742	2R
ASTEI00364	182.22	0.82661	0.207667	3.98046	6.87834e-05	0.000737917	2R
ASTEI00365	664.612	0.36672	0.757795	0.48393	0.628436	0.850644	2R
ASTEI00366	722.862	0.185679	0.37177	0.499447	0.617465	0.845326	2R
ASTEI00367	910.652	-0.977252	0.179071	-5.45734	4.83324e-08	1.17774e-06	2R
ASTEI00368	104.751	-0.377744	0.208984	-1.80753	0.0706803	0.219032	2R
ASTEI00369	137.499	0.360769	0.2308	1.56312	0.118024	0.314546	2R
ASTEI00370	67.3677	0.523721	0.377297	1.38809	0.16511	0.397178	2R
ASTEI00371	247.59	0.493966	0.212181	2.32804	0.01991	0.0840008	2R
ASTEI00372	800.411	-0.388331	0.187001	-2.07662	0.0378366	0.1391	2R
ASTEI00373	135.259	0.314001	0.274216	1.14509	0.252173	0.524012	2R
ASTEI00374	690.978	-0.210964	0.512484	-0.41165	0.680596	0.88069	2R
ASTEI00375	76.1267	-0.207518	0.587743	-0.353076	0.724032	0.898853	2R
ASTEI00376	54.2256	-0.268001	0.627012	-0.427425	0.66907	0.87541	2R
ASTEI00377	6.08746	-0.63061	0.667064	-0.945351	0.34448	0.630671	2R
ASTEI00378	113.023	-0.303464	0.196227	-1.54649	0.121986	0.321382	2R
ASTEI00379	486.553	0.232358	0.227357	1.022	0.306783	0.590872	2R
ASTEI00380	4.03725	0.481272	0.811977	0.592717	0.553371	0.806781	2R
ASTEI00381	427.45	-1.96139	0.374951	-5.23104	1.68554e-07	3.61315e-06	2R
ASTEI00382	268.52	0.0139607	0.164381	0.0849291	0.932318	0.979853	2R
ASTEI00383	178.065	0.163102	0.179786	0.9072	0.364301	0.650664	2R
ASTEI00384	1245.62	-0.0528609	0.241438	-0.218942	0.826695	0.947024	2R
ASTEI00385	1282.75	-0.177638	0.268661	-0.661197	0.508486	0.77472	2R
ASTEI00386	496.345	-0.164769	0.336153	-0.490159	0.624021	0.848904	2R
ASTEI00387	594.877	-0.107089	0.124224	-0.86206	0.388655	0.675538	2R
ASTEI00388	514.118	0.120727	0.214642	0.562454	0.573807	0.820422	2R
ASTEI00389	530.779	-0.453542	0.14771	-3.0705	0.00213702	0.0136785	2R
ASTEI00390	396.773	0.503385	0.237154	2.12261	0.0337865	0.127922	2R
ASTEI00391	301.247	0.200269	0.231722	0.864265	0.387442	0.674152	2R
ASTEI00392	401.569	-0.201016	0.260104	-0.772828	0.439624	0.721363	2R
ASTEI00393	962.09	-0.49806	0.157882	-3.15464	0.00160696	0.0106794	2R
ASTEI00394	116.883	0.152962	0.206767	0.739778	0.459434	0.736594	2R
ASTEI00395	499.925	-0.369804	0.203962	-1.8131	0.0698165	0.217223	2R
ASTEI00396	549.91	0.133394	0.234795	0.56813	0.569947	0.817854	2R
ASTEI00397	82.5957	0.311937	0.413208	0.754914	0.4503	0.729157	2R
ASTEI00398	165.018	0.000682635	0.185124	0.00368745	0.997058	0.99881	2R
ASTEI00399	95.1445	0.700659	0.231911	3.02124	0.00251739	0.0157048	2R
ASTEI00400	44.9567	0.544676	0.339006	1.60669	0.108123	0.296489	2R
ASTEI00401	159.237	0.427577	0.2268	1.88526	0.059395	0.194303	2R
ASTEI00402	197.004	-0.12473	0.164845	-0.756647	0.449261	0.728987	2R
ASTEI00403	267.611	0.543215	0.170754	3.18126	0.00146634	0.0098714	2R
ASTEI00404	871.966	0.557403	0.109392	5.09547	3.47885e-07	6.91164e-06	2R
ASTEI00406	266.23	0.0601342	0.396045	0.151837	0.879316	0.964859	2R
ASTEI00407	0.168674	-1.17792	4.40746	-0.267256	0.789272	NA	2R
ASTEI00409	71.7795	0.655437	0.215878	3.03614	0.00239626	0.0150562	2R
ASTEI00410	162.278	1.70726	0.256615	6.65301	2.87162e-11	1.33665e-09	2R
ASTEI00411	72.3476	0.254355	0.315126	0.807155	0.419577	0.703655	2R
ASTEI00412	162.839	-0.0245119	0.149931	-0.163488	0.870134	0.960728	2R
ASTEI00413	248.045	-0.178244	0.239326	-0.744773	0.456409	0.734013	2R
ASTEI00414	90.7327	0.28114	0.721134	0.389858	0.696642	0.886126	2R
ASTEI00415	115.626	0.47381	0.205773	2.30258	0.0213024	0.0885647	2R
ASTEI00416	213.316	-0.38966	0.223153	-1.74615	0.0807843	0.240225	2R
ASTEI00417	206.406	0.433031	0.229214	1.8892	0.058865	0.193123	2R
ASTEI00418	236.228	-0.531244	0.140921	-3.76979	0.000163383	0.00155658	2R
ASTEI00419	76.2135	-0.458489	0.212688	-2.15569	0.0311079	0.120052	2R
ASTEI00420	443.332	-0.260329	0.40905	-0.636423	0.524501	0.785271	2R
ASTEI00421	30.1996	-0.0256146	0.550172	-0.0465574	0.962866	0.98829	2R
ASTEI00422	71.2669	0.228581	0.588843	0.388186	0.697879	0.886555	2R
ASTEI00423	22.0329	-0.196082	0.391182	-0.501254	0.616193	0.844987	2R
ASTEI00424	281.678	-0.84528	0.263869	-3.2034	0.00135814	0.00925226	2R
ASTEI00425	4.41911	-0.895067	0.760982	-1.1762	0.239514	0.508455	2R
ASTEI00426	12.4652	-0.134228	0.522221	-0.257033	0.797153	0.933416	2R
ASTEI00427	16.4328	-0.25326	0.401064	-0.63147	0.527733	0.788134	2R
ASTEI00428	1071.9	-0.686351	0.253673	-2.70566	0.00681697	0.0358684	2R
ASTEI00429	282.887	0.478831	0.204527	2.34117	0.0192235	0.0817515	2R
ASTEI00430	763.086	-0.620721	0.267201	-2.32305	0.0201764	0.0848732	2R
ASTEI00431	171.885	-0.062552	0.165855	-0.377148	0.706064	0.890801	2R
ASTEI00432	431.745	-0.0524243	0.251686	-0.208292	0.835001	0.950031	2R
ASTEI00433	273.013	0.340574	0.487619	0.698443	0.4849	0.757801	2R
ASTEI00434	243.757	-0.442025	0.261032	-1.69338	0.0903833	0.259032	2R
ASTEI00435	108.159	0.700921	0.328082	2.13642	0.0326454	0.124553	2R
ASTEI00436	85.8652	-0.787486	0.296703	-2.65412	0.00795148	0.0403196	2R
ASTEI00437	659.646	-0.0679041	0.121535	-0.558719	0.576353	0.821659	2R
ASTEI00438	97.8585	0.648253	0.234417	2.76539	0.00568552	0.0307871	2R
ASTEI00439	117.991	0.0886337	0.180976	0.489754	0.624308	0.848904	2R
ASTEI00440	58.9621	-0.408402	0.381121	-1.07158	0.283908	0.563468	2R
ASTEI00441	88.1442	-0.597602	0.285867	-2.09049	0.036574	0.135727	2R
ASTEI00442	40.9795	-1.56396	0.424857	-3.68113	0.000232199	0.00210313	2R
ASTEI00443	16.4976	-0.383224	0.41485	-0.923766	0.355608	0.642818	2R
ASTEI00444	0.702799	0.765122	1.8382	0.416235	0.677238	0.878491	2R
ASTEI00445	1480.48	0.328018	0.225667	1.45355	0.146072	0.365789	2R
ASTEI00446	73.8654	-2.68436	0.395601	-6.78552	1.15673e-11	5.81117e-10	2R
ASTEI00447	0.239914	-0.216132	4.40746	-0.0490377	0.960889	NA	2R
ASTEI00448	15.8566	0.789107	0.523162	1.50834	0.131467	0.338947	2R
ASTEI00449	999.93	-0.339222	0.171209	-1.98133	0.0475541	0.165742	2R
ASTEI00450	5394.26	-0.384644	0.161135	-2.3871	0.0169821	0.0740871	2R
ASTEI00451	468.967	0.996235	0.557142	1.78812	0.073757	0.225866	2R
ASTEI00452	38.1534	0.743029	0.318599	2.33218	0.0196914	0.0832014	2R
ASTEI00453	6116.83	-0.604525	0.170945	-3.53638	0.000405651	0.00335707	2R
ASTEI00454	253.939	0.979345	0.286375	3.4198	0.000626677	0.00487492	2R
ASTEI00455	253.495	-0.923553	0.354649	-2.60413	0.00921082	0.0454301	2R
ASTEI00456	85.017	2.30644	0.392835	5.87126	4.3249e-09	1.32941e-07	2R
ASTEI00457	211.462	-0.164063	0.309931	-0.529352	0.596561	0.834849	2R
ASTEI00458	509.703	-0.746034	0.204344	-3.65088	0.000261347	0.00231938	2R
ASTEI00459	301.613	-0.463261	0.219445	-2.11106	0.0347673	0.130681	2R
ASTEI00460	55.257	0.296736	0.33572	0.883878	0.376762	0.662237	2R
ASTEI00461	89.183	0.291458	0.241098	1.20887	0.226711	0.490964	2R
ASTEI00462	20.3138	-0.0888975	0.389154	-0.228438	0.819306	0.943774	2R
ASTEI00463	207.901	-0.840788	0.311619	-2.69813	0.00697301	0.0365442	2R
ASTEI00464	3092.2	-0.619304	0.0750674	-8.24997	1.58436e-16	1.67297e-14	2R
ASTEI00465	224.704	0.477085	0.251551	1.89658	0.0578838	0.190837	2R
ASTEI00466	10.5117	-0.327769	0.556901	-0.588559	0.556157	0.808589	2R
ASTEI00467	55.9569	-0.186852	0.325497	-0.574051	0.565933	0.814887	2R
ASTEI00468	703.337	-0.243866	0.246913	-0.98766	0.323319	0.609142	2R
ASTEI00469	32.3791	1.58403	0.500831	3.16279	0.00156264	0.010403	2R
ASTEI00470	2035.26	-0.18489	0.101578	-1.82018	0.0687312	0.214919	2R
ASTEI00472	117.541	0.216242	0.414133	0.522155	0.601563	0.837177	2R
ASTEI00473	95.6766	0.29269	0.609944	0.479864	0.631324	0.851824	2R
ASTEI00474	150.347	-0.462495	0.271532	-1.70328	0.0885161	0.255166	2R
ASTEI00475	498.201	-0.301475	0.213195	-1.41409	0.157337	0.385037	2R
ASTEI00476	156.939	1.3914	0.366294	3.7986	0.000145515	0.00140394	2R
ASTEI00477	791.035	-0.322432	0.232821	-1.38489	0.166086	0.398495	2R
ASTEI00478	414.095	0.187726	0.249901	0.751201	0.452532	0.730766	2R
ASTEI00479	117.823	0.618618	0.247311	2.50137	0.0123713	0.0575612	2R
ASTEI00480	27.3492	0.555089	0.529367	1.04859	0.294366	0.575807	2R
ASTEI00481	22.6118	0.66257	0.505386	1.31102	0.189852	0.438007	2R
ASTEI00482	10.1466	-0.252145	0.520632	-0.484306	0.628169	0.850644	2R
ASTEI00483	159.288	1.42695	0.240674	5.92898	3.04823e-09	9.68302e-08	2R
ASTEI00484	155.337	0.507687	0.209678	2.42128	0.0154661	0.068709	2R
ASTEI00485	0.144803	0.745655	4.40746	0.16918	0.865655	NA	2R
ASTEI00486	0.760916	0.351504	2.1296	0.165057	0.868899	0.960075	2R
ASTEI00487	131.439	0.292129	0.25782	1.13307	0.257184	0.530078	2R
ASTEI00488	250.82	-0.636317	0.186283	-3.41587	0.000635788	0.00492563	2R
ASTEI00489	23.9737	1.9494	0.571361	3.41186	0.000645213	0.00497722	2R
ASTEI00490	737.849	-0.0531399	0.165497	-0.321093	0.74814	0.911607	2R
ASTEI00491	46.5294	0.146234	0.264301	0.553286	0.580068	0.824311	2R
ASTEI00492	257.202	-0.676277	0.19775	-3.41986	0.000626528	0.00487492	2R
ASTEI00493	259.368	0.449745	0.251721	1.78668	0.0739896	0.226457	2R
ASTEI00494	104.193	-0.123343	0.734406	-0.16795	0.866623	0.958674	2R
ASTEI00495	702.572	-0.0226683	0.398151	-0.0569339	0.954598	0.985996	2R
ASTEI00496	120.223	-0.0481017	0.317261	-0.151615	0.87949	0.964859	2R
ASTEI00497	497.575	-1.04942	0.374524	-2.80202	0.00507835	0.0280046	2R
ASTEI00498	906.104	0.52383	0.245868	2.13053	0.0331275	0.125951	2R
ASTEI00499	209.666	0.476223	0.201458	2.36388	0.0180849	0.0777678	2R
ASTEI00500	651.694	-1.24237	0.638409	-1.94604	0.0516493	0.176466	2R
ASTEI00501	661.528	-0.14535	0.109798	-1.32379	0.185572	0.430923	2R
ASTEI00502	160.731	0.177795	0.633761	0.28054	0.779063	0.925383	2R
ASTEI00503	157.758	-0.267143	0.252984	-1.05597	0.290983	0.572045	2R
ASTEI00504	219.709	0.43441	0.181735	2.39035	0.0168322	0.0734612	2R
ASTEI00505	106.858	0.384821	0.2197	1.75157	0.0798475	0.238372	2R
ASTEI00506	96.3457	1.13089	0.295607	3.82566	0.000130421	0.00127777	2R
ASTEI00507	443.471	-0.0996491	0.160598	-0.620487	0.534937	0.792936	2R
ASTEI00508	275.804	0.0851869	0.139597	0.610234	0.541707	0.798147	2R
ASTEI00509	261.27	0.942116	0.160325	5.87628	4.19587e-09	1.29324e-07	2R
ASTEI00510	268.991	1.06568	0.197903	5.38483	7.25144e-08	1.70858e-06	2R
ASTEI00511	922.939	0.615608	0.146236	4.2097	2.55714e-05	0.000311556	2R
ASTEI00512	42.8544	1.77259	0.285823	6.2017	5.58554e-10	2.05476e-08	2R
ASTEI00513	238.412	-0.762909	0.190131	-4.01255	6.00674e-05	0.00066083	2R
ASTEI00514	219.522	0.0147469	0.486425	0.0303169	0.975814	0.992436	2R
ASTEI00515	229.626	-0.267546	0.23821	-1.12315	0.261374	0.535909	2R
ASTEI00516	125.504	0.0706216	0.262402	0.269135	0.787825	0.930058	2R
ASTEI00517	205.619	0.250513	0.232819	1.076	0.281928	0.561494	2R
ASTEI00518	505.158	0.735727	0.169587	4.33834	1.43563e-05	0.000185622	2R
ASTEI00519	627.262	-0.207082	0.15821	-1.30891	0.190566	0.438855	2R
ASTEI00520	234.466	0.27492	0.184115	1.4932	0.135385	0.345816	2R
ASTEI00521	278.81	1.54382	0.248022	6.22453	4.83001e-10	1.81189e-08	2R
ASTEI00522	0.361223	2.17431	4.0029	0.543182	0.587004	0.829749	2R
ASTEI00523	0.273954	-1.17792	4.24772	-0.277306	0.781545	0.926191	2R
ASTEI00524	42.7241	0.36991	0.558579	0.662234	0.507821	0.774166	2R
ASTEI00525	0.912111	-0.216134	1.96499	-0.109992	0.912416	0.97481	2R
ASTEI00526	0.299692	0.704177	3.29041	0.214009	0.83054	0.94891	2R
ASTEI00527	1.91336	-0.523655	1.43993	-0.363668	0.716106	0.895054	2R
ASTEI00528	1.11686	-0.847466	1.81327	-0.467369	0.640236	0.859173	2R
ASTEI00529	0.497954	-2.65881	3.00211	-0.885646	0.375809	0.661548	2R
ASTEI00530	28.4788	-0.546743	0.408168	-1.3395	0.180407	0.422455	2R
ASTEI00531	0.256321	-0.216132	4.40746	-0.0490377	0.960889	NA	2R
ASTEI00532	55.7901	0.263757	0.476265	0.553804	0.579713	0.824012	2R
ASTEI00533	146.492	0.107661	0.505633	0.212924	0.831386	0.949324	2R
ASTEI00534	430.198	-1.07125	0.22783	-4.70196	2.57676e-06	4.05316e-05	2R
ASTEI00535	293.919	0.433115	0.248026	1.74625	0.0807677	0.240225	2R
ASTEI00536	188.908	-0.434071	0.235635	-1.84213	0.0654555	0.207752	2R
ASTEI00537	9.13818	-0.655247	0.731945	-0.895213	0.370673	0.656798	2R
ASTEI00538	6.75054	-0.894364	0.722151	-1.23847	0.215541	0.474982	2R
ASTEI00539	162.293	-0.233011	0.234243	-0.994738	0.319864	0.605483	2R
ASTEI00540	652.016	-1.08912	0.147192	-7.39932	1.3688e-13	8.81911e-12	2R
ASTEI00541	296.871	-0.270163	0.182125	-1.4834	0.137969	0.350736	2R
ASTEI00542	5.50968	-0.232697	0.809045	-0.28762	0.773638	0.923748	2R
ASTEI00543	88.9383	0.427157	0.245677	1.73869	0.0820893	0.242777	2R
ASTEI00544	645.087	-0.0403113	0.142332	-0.283221	0.777008	0.92514	2R
ASTEI00545	68.6969	0.32443	0.649044	0.499858	0.617175	0.845265	2R
ASTEI00546	849.761	-0.0605173	0.524404	-0.115402	0.908126	0.974183	2R
ASTEI00547	350.458	-0.159565	0.542924	-0.2939	0.768834	0.922051	2R
ASTEI00548	156.173	0.20502	0.211202	0.970731	0.331682	0.61735	2R
ASTEI00549	114.465	-0.0135374	0.677013	-0.0199958	0.984047	0.99447	2R
ASTEI00550	236.036	-0.122973	0.232721	-0.528413	0.597213	0.835248	2R
ASTEI00551	449.166	-1.09522	0.181405	-6.0374	1.56619e-09	5.26868e-08	2R
ASTEI00552	179.021	-0.495206	0.227226	-2.17935	0.0293055	0.114727	2R
ASTEI00553	134.37	-0.513599	0.183585	-2.7976	0.00514833	0.0283617	2R
ASTEI00554	105.977	-0.171689	0.258731	-0.663578	0.50696	0.773949	2R
ASTEI00555	1614.73	0.271243	0.108797	2.4931	0.0126632	0.0586083	2R
ASTEI00556	636.33	0.353624	0.346775	1.01975	0.307847	0.591516	2R
ASTEI00557	196.871	-0.135899	0.610394	-0.222641	0.823815	0.946101	2R
ASTEI00558	434.67	0.650785	0.200161	3.2513	0.00114879	0.00806698	2R
ASTEI00559	387.46	-0.115862	0.192571	-0.601655	0.547404	0.802597	2R
ASTEI00560	10.0605	1.45465	0.856371	1.69863	0.0893895	0.256905	2R
ASTEI00561	192.697	-0.177408	0.167104	-1.06166	0.288389	0.568602	2R
ASTEI00562	522.625	-0.086826	0.216161	-0.401673	0.687925	0.883203	2R
ASTEI00563	718.325	0.968298	0.193426	5.00603	5.55645e-07	1.0561e-05	2R
ASTEI00564	39.0651	0.212081	0.289747	0.731954	0.464196	0.740377	2R
ASTEI00565	265.845	0.164004	0.249027	0.65858	0.510165	0.77593	2R
ASTEI00566	93.1757	-0.326421	0.328202	-0.994573	0.319944	0.605483	2R
ASTEI00567	312.983	0.195662	0.199282	0.981834	0.326182	0.611001	2R
ASTEI00568	1261.15	-0.341995	0.163886	-2.08679	0.0369074	0.136653	2R
ASTEI00569	80.3237	1.47359	0.284512	5.17934	2.22676e-07	4.6255e-06	2R
ASTEI00570	46.0926	-0.176579	0.366402	-0.481928	0.629857	0.8511	2R
ASTEI00571	158.104	-0.165382	0.20555	-0.804583	0.42106	0.705002	2R
ASTEI00572	130.424	-0.392148	0.242822	-1.61496	0.106319	0.293362	2R
ASTEI00573	1785.47	-0.646637	0.154299	-4.1908	2.77969e-05	0.000335091	2R
ASTEI00574	531.117	0.344321	0.179242	1.92098	0.054734	0.183916	2R
ASTEI00575	227.408	-0.38268	0.36978	-1.03488	0.300723	0.582661	2R
ASTEI00576	357.268	-0.0986544	0.205941	-0.479041	0.631909	0.852273	2R
ASTEI00577	136.715	-0.209859	0.248238	-0.845394	0.397891	0.683572	2R
ASTEI00578	691.241	-0.0676741	0.289726	-0.23358	0.815311	0.942696	2R
ASTEI00579	91.0822	-0.18798	0.485627	-0.387087	0.698692	0.886897	2R
ASTEI00580	0.329719	-1.17792	3.25386	-0.362008	0.717346	0.895947	2R
ASTEI00581	0.825464	-0.773412	2.00933	-0.384911	0.700303	0.887667	2R
ASTEI00582	11.9219	-1.21835	0.634195	-1.9211	0.0547193	0.183916	2R
ASTEI00583	1.45613	0.755652	1.33287	0.566934	0.570759	0.818328	2R
ASTEI00584	1102.01	-0.228231	0.0937867	-2.43351	0.0149532	0.0671365	2R
ASTEI00585	652.495	-0.416701	0.223788	-1.86203	0.0625984	0.201239	2R
ASTEI00586	396.827	0.338619	0.205584	1.64711	0.0995358	0.278668	2R
ASTEI00587	328.604	0.0221387	0.294661	0.0751327	0.940109	0.982227	2R
ASTEI00588	301.111	0.0227121	0.19072	0.119086	0.905207	0.974183	2R
ASTEI00589	1.5949	0.372073	1.19359	0.311725	0.755249	0.915872	2R
ASTEI00590	0.697029	1.64691	1.91616	0.859483	0.390074	0.676563	2R
ASTEI00591	847.561	-0.401902	0.223358	-1.79936	0.0719611	0.221512	2R
ASTEI00592	14.0055	-1.15187	0.577073	-1.99605	0.0459281	0.161059	2R
ASTEI00593	128.589	-1.80538	0.208233	-8.66999	4.32167e-18	5.47604e-16	2R
ASTEI00594	156.394	-0.364643	0.563053	-0.647617	0.517233	0.780744	2R
ASTEI00595	2.42075	1.02527	0.882254	1.1621	0.245196	0.515677	2R
ASTEI00597	159.029	-0.463914	0.444262	-1.04423	0.296377	0.578067	2R
ASTEI00598	56.5715	0.267108	0.500014	0.534201	0.593203	0.833039	2R
ASTEI00599	83.7392	-0.0415834	0.718442	-0.0578799	0.953844	0.985996	2R
ASTEI00600	761.643	-0.521943	0.176734	-2.95326	0.00314439	0.0188187	2R
ASTEI00601	159.397	0.291029	0.204793	1.42109	0.15529	0.381453	2R
ASTEI00602	164.92	0.46369	0.249102	1.86145	0.0626809	0.201299	2R
ASTEI00603	94.5112	0.45237	0.410875	1.10099	0.2709	0.548259	2R
ASTEI00604	107.138	-0.130246	0.264648	-0.492148	0.622614	0.848607	2R
ASTEI00605	221.088	0.812561	0.220066	3.69236	0.000222185	0.00203518	2R
ASTEI00606	60.8552	-0.0373507	0.269273	-0.13871	0.88968	0.968828	2R
ASTEI00607	113.166	0.121068	0.555896	0.217788	0.827594	0.94737	2R
ASTEI00608	1.21502	-0.221804	1.95638	-0.113375	0.909733	0.974598	2R
ASTEI00609	0.197538	-0.216132	4.40746	-0.0490377	0.960889	NA	2R
ASTEI00610	97.4801	0.138796	0.249021	0.557366	0.577278	0.822293	2R
ASTEI00611	490.257	-0.20264	0.114089	-1.77615	0.0757078	0.229987	2R
ASTEI00612	35.926	0.298216	0.422461	0.705902	0.480249	0.754211	2R
ASTEI00613	1812.59	-0.777338	0.225614	-3.44544	0.000570131	0.00450886	2R
ASTEI00614	212.993	-0.0227216	0.625486	-0.0363264	0.971022	0.990743	2R
ASTEI00615	188.837	-0.131995	0.219952	-0.600109	0.548433	0.803319	2R
ASTEI00616	323.983	-0.641737	0.194906	-3.29254	0.000992861	0.00710325	2R
ASTEI00617	48.359	0.205692	0.289666	0.7101	0.477642	0.752976	2R
ASTEI00618	40.357	0.819267	0.402493	2.03548	0.0418022	0.149674	2R
ASTEI00619	426.28	-0.388777	0.598523	-0.64956	0.515976	0.779961	2R
ASTEI00620	13.2213	0.483396	0.453234	1.06655	0.286176	0.566097	2R
ASTEI00621	256.088	0.133655	0.200974	0.665039	0.506026	0.77314	2R
ASTEI00622	7.75194	-0.222176	0.597483	-0.371854	0.710002	0.892708	2R
ASTEI00623	299.819	0.495944	0.175503	2.82585	0.00471551	0.0263995	2R
ASTEI00624	21.5385	-0.396936	0.522561	-0.759599	0.447495	0.728126	2R
ASTEI00625	97.934	0.299794	0.241707	1.24032	0.214857	0.474024	2R
ASTEI00626	413.446	1.30457	0.403525	3.23293	0.00122528	0.0084943	2R
ASTEI00628	173.203	0.0396118	0.442617	0.0894945	0.928689	0.979629	2R
ASTEI00629	1.68628	1.04461	1.33681	0.781426	0.434552	0.71859	2R
ASTEI00630	176.53	0.0222975	0.193523	0.115219	0.908272	0.974183	2R
ASTEI00631	143.403	0.322023	0.198717	1.62051	0.105123	0.290906	2R
ASTEI00632	312.337	0.064454	0.358433	0.179822	0.857292	0.955529	2R
ASTEI00633	103.259	0.380797	0.442608	0.860349	0.389597	0.676372	2R
ASTEI00634	48.8504	0.512414	0.621389	0.824627	0.409583	0.694969	2R
ASTEI00635	5.2205	0.803918	0.679506	1.18309	0.236773	0.504513	2R
ASTEI00636	147.61	-0.0524724	0.45524	-0.115263	0.908237	0.974183	2R
ASTEI00637	339.231	-0.037128	0.174769	-0.212441	0.831763	0.949324	2R
ASTEI00638	212.666	-0.410359	0.293299	-1.39912	0.161778	0.39205	2R
ASTEI00639	456.819	-0.634654	0.168877	-3.75809	0.000171218	0.00162174	2R
ASTEI00640	142.824	-0.0783664	0.18289	-0.428488	0.668296	0.875154	2R
ASTEI00641	613.64	0.176465	0.18717	0.942805	0.345781	0.632038	2R
ASTEI00642	28.837	-0.0174898	0.356787	-0.0490202	0.960903	0.988038	2R
ASTEI00643	149.427	0.218545	0.225961	0.96718	0.333454	0.619144	2R
ASTEI00644	151.147	-0.101922	0.210566	-0.48404	0.628358	0.850644	2R
ASTEI00645	532.52	-0.0714596	0.159826	-0.447108	0.654797	0.867205	2R
ASTEI00646	434.908	0.407229	0.165182	2.46534	0.0136885	0.0623914	2R
ASTEI00647	244.336	-0.257554	0.215082	-1.19747	0.231124	0.496711	2R
ASTEI00648	125.893	0.152822	0.731905	0.2088	0.834604	0.950031	2R
ASTEI00649	162.331	-0.0421296	0.464201	-0.0907571	0.927686	0.979215	2R
ASTEI00650	105.743	-0.0432569	0.371902	-0.116313	0.907405	0.974183	2R
ASTEI00651	78.365	0.0146263	0.256337	0.0570587	0.954498	0.985996	2R
ASTEI00652	50.2985	2.91309	0.305696	9.52935	1.58266e-21	3.92361e-19	2R
ASTEI00653	842.961	-0.654216	0.660498	-0.990489	0.321935	0.607738	2R
ASTEI00654	155.134	0.629122	0.205298	3.06443	0.00218086	0.0138941	2R
ASTEI00655	1.63945	-0.965499	1.12556	-0.857796	0.391005	0.677347	2R
ASTEI00656	0.392051	-0.216132	4.00395	-0.0539798	0.956951	0.987049	2R
ASTEI00657	0.700335	0.791979	1.86282	0.425151	0.670727	0.875964	2R
ASTEI00658	34.7098	0.63475	0.357579	1.77513	0.0758762	0.230376	2R
ASTEI00659	604.999	-0.835457	0.175352	-4.76445	1.89371e-06	3.09397e-05	2R
ASTEI00660	72.115	0.538725	0.283181	1.90241	0.0571182	0.189095	2R
ASTEI00661	15.0071	-0.99933	0.684737	-1.45944	0.144445	0.362976	2R
ASTEI00662	642.449	0.415746	0.182604	2.27676	0.0228008	0.0933647	2R
ASTEI00663	40.9863	0.61884	0.280788	2.20394	0.0275287	0.108667	2R
ASTEI00664	679.238	-0.00563317	0.401406	-0.0140336	0.988803	0.996724	2R
ASTEI00665	130.45	0.65362	0.226564	2.88493	0.00391501	0.0226898	2R
ASTEI00666	391.91	0.537621	0.348593	1.54226	0.123011	0.323006	2R
ASTEI00667	81.1813	0.0353172	0.410189	0.0860998	0.931387	0.979847	2R
ASTEI00668	178.809	-0.329734	0.311748	-1.05769	0.290195	0.571173	2R
ASTEI00669	374.814	0.352694	0.709553	0.497065	0.619143	0.846709	2R
ASTEI00670	507.384	-0.35619	0.414391	-0.859551	0.390037	0.676563	2R
ASTEI00671	796.675	-0.197984	0.535354	-0.369818	0.711518	0.893078	2R
ASTEI00672	1210.17	0.184455	0.0897601	2.05498	0.0398813	0.14444	2R
ASTEI00673	15.3	-0.585582	0.454765	-1.28766	0.197865	0.450299	2R
ASTEI00674	16.8167	-1.31363	0.423034	-3.10526	0.0019011	0.0123604	2R
ASTEI00675	613.429	-2.68068	0.238588	-11.2356	2.72672e-29	1.63661e-26	2R
ASTEI00676	931.182	-1.85277	0.22393	-8.27386	1.29696e-16	1.38229e-14	2R
ASTEI00677	102.312	0.595957	0.263539	2.26136	0.0237369	0.0964016	2R
ASTEI00678	201.752	0.787582	0.264964	2.97241	0.00295469	0.0179325	2R
ASTEI00679	552.734	-0.254574	0.538809	-0.472476	0.636587	0.856292	2R
ASTEI00680	392.869	-2.05261	0.396633	-5.17508	2.2781e-07	4.70643e-06	2R
ASTEI00681	367.95	0.0425327	0.187511	0.226828	0.820558	0.944306	2R
ASTEI00682	20.0166	0.684837	0.369468	1.85358	0.0637994	0.204023	2R
ASTEI00683	127.139	0.0127091	0.306012	0.0415312	0.966872	0.988894	2R
ASTEI00684	218.866	0.0771824	0.254294	0.303516	0.761496	0.918265	2R
ASTEI00685	59.3839	0.0477858	0.232752	0.205307	0.837332	0.950426	2R
ASTEI00686	20.8934	-0.0356898	0.338136	-0.105549	0.915941	0.974994	2R
ASTEI00687	219.106	0.270271	0.17083	1.58211	0.113625	0.307276	2R
ASTEI00688	197.128	-0.126642	0.310144	-0.408334	0.683028	0.881751	2R
ASTEI00689	171.478	0.552267	0.184848	2.98768	0.002811	0.0171885	2R
ASTEI00690	355.722	0.582124	0.191122	3.04582	0.00232046	0.0146444	2R
ASTEI00691	33.6854	0.0549947	0.358119	0.153565	0.877952	0.964192	2R
ASTEI00692	55.7894	0.332789	0.360688	0.922651	0.356189	0.643432	2R
ASTEI00693	80.0218	1.08074	0.260836	4.14336	3.42261e-05	0.000402802	2R
ASTEI00694	89.6825	0.698511	0.295956	2.36019	0.0182658	0.0784568	2R
ASTEI00695	138.927	-0.174509	0.439767	-0.396821	0.691499	0.884756	2R
ASTEI00696	635.693	-0.221071	0.173739	-1.27243	0.20322	0.457557	2R
ASTEI00697	506.28	0.837618	0.156436	5.35437	8.58549e-08	1.98196e-06	2R
ASTEI00698	7.49335	0.712105	0.688137	1.03483	0.300748	0.582661	2R
ASTEI00699	192.18	0.227227	0.265433	0.856064	0.391962	0.678497	2R
ASTEI00700	224.262	-0.363626	0.501688	-0.724805	0.468571	0.744148	2R
ASTEI00701	103.802	-1.26785	0.35755	-3.54592	0.000391239	0.00325433	2R
ASTEI00702	984.35	-0.258572	0.177604	-1.45589	0.145423	0.364324	2R
ASTEI00703	408.29	0.160393	0.135009	1.18802	0.234827	0.502231	2R
ASTEI00704	69.3029	0.203183	0.362254	0.560886	0.574875	0.820819	2R
ASTEI00705	230.553	-0.321928	0.200452	-1.60601	0.108271	0.296736	2R
ASTEI00706	1506.92	-0.500523	0.183744	-2.72403	0.00644915	0.0343353	2R
ASTEI00707	1570.22	-0.454965	0.171747	-2.64904	0.00807201	0.040708	2R
ASTEI00708	834.551	-0.449051	0.0910206	-4.93351	8.0766e-07	1.48318e-05	2R
ASTEI00709	292.359	-0.539587	0.302399	-1.78436	0.0743658	0.227486	2R
ASTEI00710	360.442	0.0117358	0.280349	0.0418613	0.966609	0.988768	2R
ASTEI00711	37.8547	-0.176932	0.302398	-0.585095	0.558484	0.809269	2R
ASTEI00712	8.35562	0.0581892	0.584253	0.099596	0.920665	0.97636	2R
ASTEI00713	730.485	-1.62434	0.218844	-7.42238	1.1503e-13	7.58269e-12	2R
ASTEI00714	352.419	-0.484274	0.41696	-1.16144	0.245463	0.515898	2R
ASTEI00715	209.636	1.61911	0.290799	5.56779	2.57993e-08	6.68671e-07	2R
ASTEI00716	3471.69	-0.272384	0.0873491	-3.11834	0.00181875	0.0118791	2R
ASTEI00717	88.0513	0.135989	0.267532	0.508308	0.611237	0.843018	2R
ASTEI00718	6.06751	-1.14511	0.723335	-1.58309	0.1134	0.306886	2R
ASTEI00719	34.0933	8.54613	1.21417	7.03868	1.94066e-12	1.10656e-10	2R
ASTEI00720	11.666	-3.70834	0.943369	-3.93096	8.46078e-05	0.00087795	2R
ASTEI00721	78.3467	0.0240487	0.251079	0.0957814	0.923694	0.977591	2R
ASTEI00722	1.68959	3.16586	1.7788	1.77977	0.0751138	0.229093	2R
ASTEI00723	124.879	0.0447864	0.426581	0.104989	0.916384	0.974994	2R
ASTEI00724	0.144803	0.745655	4.40746	0.16918	0.865655	NA	2R
ASTEI00725	0.225933	-1.07047	4.37151	-0.244875	0.806553	NA	2R
ASTEI00726	2.08275	-2.75314	1.75178	-1.57163	0.116037	0.311215	2R
ASTEI00727	75.8328	-0.154761	0.264618	-0.584846	0.558651	0.809323	2R
ASTEI00728	46.9839	0.18088	0.31344	0.577081	0.563885	0.813293	2R
ASTEI00729	2.56317	4.42684	1.37956	3.20888	0.00133251	0.00910203	2R
ASTEI00730	16.6905	1.36776	0.468803	2.91756	0.00352785	0.0208023	2R
ASTEI00731	484.207	-0.238364	0.144335	-1.65146	0.0986446	0.276603	2R
ASTEI00732	121.099	0.242708	0.323561	0.750115	0.453186	0.731083	2R
ASTEI00733	18.2076	0.0222993	0.372704	0.059831	0.95229	0.985631	2R
ASTEI00734	771.796	-0.179267	0.111472	-1.60818	0.107795	0.296074	2R
ASTEI00735	1458.04	-0.278488	0.153315	-1.81645	0.0693018	0.216348	2R
ASTEI00736	139.169	-0.223929	0.226546	-0.988445	0.322935	0.609051	2R
ASTEI00737	390.474	-0.142676	0.243195	-0.586673	0.557423	0.808702	2R
ASTEI00738	136.856	-0.103197	0.235997	-0.43728	0.661908	0.871167	2R
ASTEI00740	77.2909	0.652024	0.262412	2.48474	0.0129648	0.0596524	2R
ASTEI00741	2.49949	0.220088	1.13784	0.193426	0.846625	0.951829	2R
ASTEI00742	15.439	0.786485	0.382575	2.05577	0.039805	0.144244	2R
ASTEI00743	94.4222	-0.463571	0.33322	-1.39119	0.164169	0.395676	2R
ASTEI00744	334.425	-0.768707	0.147995	-5.19414	2.05669e-07	4.2957e-06	2R
ASTEI00745	150.232	0.669304	0.218039	3.06966	0.00214306	0.0136915	2R
ASTEI00746	308.625	-0.52683	0.168193	-3.13229	0.0017345	0.0113942	2R
ASTEI00747	19.2873	0.629256	0.456387	1.37878	0.167964	0.402154	2R
ASTEI00748	109.622	-0.0299894	0.280026	-0.107095	0.914714	0.97481	2R
ASTEI00749	40.5606	0.843031	0.34637	2.4339	0.014937	0.0670901	2R
ASTEI00750	162.041	0.0826626	0.340188	0.242991	0.808012	0.938826	2R
ASTEI00751	0.335159	1.66182	3.19936	0.519424	0.603465	0.838134	2R
ASTEI00752	61.4369	0.126443	0.415009	0.304676	0.760613	0.918209	2R
ASTEI00753	1026.22	0.362029	0.206846	1.75024	0.0800778	0.238684	2R
ASTEI00754	122.219	-0.199923	0.174117	-1.14821	0.25088	0.522356	2R
ASTEI00755	100.638	-0.315588	0.294241	-1.07255	0.283474	0.562998	2R
ASTEI00756	204.793	-0.520001	0.445636	-1.16687	0.243261	0.513257	2R
ASTEI00757	32.2484	-0.0892193	0.66061	-0.135056	0.892568	0.96988	2R
ASTEI00758	156.326	0.4021	0.451186	0.891206	0.372819	0.658795	2R
ASTEI00759	128.117	0.4643	0.2783	1.66834	0.0952475	0.269529	2R
ASTEI00760	84.5502	0.82537	0.27648	2.98528	0.0028332	0.0172872	2R
ASTEI00761	133.645	0.0193098	0.21496	0.0898295	0.928423	0.979439	2R
ASTEI00762	71.3685	0.0123681	0.255151	0.0484735	0.961339	0.988099	2R
ASTEI00763	42.6181	1.03726	0.293733	3.53129	0.000413543	0.00340754	2R
ASTEI00764	156.292	0.316491	0.269537	1.1742	0.240313	0.509569	2R
ASTEI00765	88.6492	0.249711	0.256378	0.973997	0.330058	0.615633	2R
ASTEI00766	633.045	0.175583	0.336223	0.522222	0.601516	0.837177	2R
ASTEI00767	117.298	-0.00176543	0.245809	-0.00718213	0.99427	0.997775	2R
ASTEI00768	107.149	1.99209	0.261226	7.62593	2.42283e-14	1.75987e-12	2R
ASTEI00769	434.961	0.901249	0.188737	4.77516	1.79564e-06	2.95225e-05	2R
ASTEI00770	508.155	0.535532	0.190166	2.81612	0.00486069	0.0270661	2R
ASTEI00771	523.19	-0.144356	0.362	-0.398773	0.69006	0.88399	2R
ASTEI00772	298.817	0.850382	0.133356	6.37681	1.80818e-10	7.23527e-09	2R
ASTEI00773	226.196	-0.284468	0.196183	-1.45001	0.147055	0.367605	2R
ASTEI00774	543.268	0.156473	0.230734	0.678154	0.497674	0.766825	2R
ASTEI00775	113.896	-0.23006	0.451123	-0.509972	0.610071	0.842126	2R
ASTEI00776	69.2095	0.309684	0.676837	0.457546	0.647279	0.862736	2R
ASTEI00777	233.804	-0.543409	0.284386	-1.91082	0.0560279	0.186524	2R
ASTEI00778	186.446	-0.239722	0.209509	-1.14421	0.252538	0.524388	2R
ASTEI00779	105.335	-0.174575	0.340161	-0.513213	0.607802	0.840473	2R
ASTEI00780	323.893	-0.1633	0.361486	-0.451745	0.651452	0.865198	2R
ASTEI00781	213.406	0.57731	0.258583	2.23259	0.0255759	0.102411	2R
ASTEI00782	222.355	-0.686814	0.353201	-1.94454	0.0518298	0.17686	2R
ASTEI00783	189.342	-0.471847	0.463368	-1.0183	0.308537	0.592249	2R
ASTEI00784	107.918	0.0473237	0.27318	0.173233	0.862469	0.958347	2R
ASTEI00785	263.602	-0.0699687	0.18189	-0.384676	0.700478	0.887667	2R
ASTEI00786	87.8773	0.513953	0.266158	1.93101	0.0534822	0.180948	2R
ASTEI00787	42.0704	0.0148697	0.667818	0.0222661	0.982236	0.993982	2R
ASTEI00788	102.41	0.269932	0.394329	0.684535	0.493637	0.764662	2R
ASTEI00789	4.89545	-0.0169393	0.739397	-0.0229096	0.981722	0.993982	2R
ASTEI00790	406.721	0.257915	0.240218	1.07367	0.28297	0.562555	2R
ASTEI00791	66.518	0.264943	0.2837	0.933882	0.350365	0.637453	2R
ASTEI00792	194.271	-0.198066	0.411801	-0.480975	0.630535	0.851411	2R
ASTEI00793	69.3014	0.153794	0.294153	0.522837	0.601087	0.836972	2R
ASTEI00794	265.238	-0.104354	0.211095	-0.494348	0.62106	0.848087	2R
ASTEI00795	465.774	-1.21556	0.158901	-7.64976	2.01347e-14	1.49102e-12	2R
ASTEI00796	82.2642	0.188244	0.191371	0.98366	0.325283	0.61042	2R
ASTEI00797	636.591	0.0745348	0.142696	0.522334	0.601438	0.837177	2R
ASTEI00798	1.11697	0.387179	1.74921	0.221346	0.824823	0.946615	2R
ASTEI00799	104.74	-0.0936442	0.254159	-0.368448	0.712539	0.893436	2R
ASTEI00800	65.1666	0.778068	0.271126	2.86977	0.00410775	0.0235994	2R
ASTEI00801	15.9774	0.711188	0.638563	1.11373	0.265394	0.541983	2R
ASTEI00802	24.3509	0.50418	0.395339	1.27531	0.202199	0.455978	2R
ASTEI00803	1.07277	-1.78051	1.94221	-0.916748	0.359275	0.646782	2R
ASTEI00804	142.472	0.531246	0.676401	0.785401	0.432219	0.716323	2R
ASTEI00805	292.581	0.207847	0.416587	0.498928	0.61783	0.845522	2R
ASTEI00806	365.958	-0.138195	0.164321	-0.841002	0.400347	0.686447	2R
ASTEI00807	30.4757	0.100537	0.558487	0.180016	0.85714	0.955529	2R
ASTEI00808	77.6238	-0.226661	0.279181	-0.811879	0.416861	0.70106	2R
ASTEI00809	195.909	-1.46873	0.265229	-5.53758	3.06677e-08	7.78918e-07	2R
ASTEI00810	628.199	0.0029921	0.16803	0.0178069	0.985793	0.995394	2R
ASTEI00811	1225.04	-0.268402	0.175763	-1.52707	0.126744	0.329697	2R
ASTEI00812	42.4003	0.573376	0.28336	2.02349	0.0430229	0.153323	2R
ASTEI00813	377.94	0.189702	0.212071	0.894525	0.371041	0.657246	2R
ASTEI00814	359.172	0.399064	0.275603	1.44797	0.147626	0.36863	2R
ASTEI00815	88.1244	0.447129	0.335824	1.33144	0.183045	0.42688	2R
ASTEI00816	154.738	0.202317	0.333726	0.606236	0.544358	0.799941	2R
ASTEI00817	3.45868	-0.585335	0.934802	-0.626159	0.53121	0.790263	2R
ASTEI00818	126.658	0.630407	0.200684	3.14129	0.00168203	0.0111135	2R
ASTEI00819	11.4357	-0.88132	0.599929	-1.46904	0.141822	0.358452	2R
ASTEI00820	73.4085	-0.294742	0.561758	-0.524679	0.599806	0.836755	2R
ASTEI00821	172.148	-0.130732	0.208921	-0.625747	0.531481	0.79044	2R
ASTEI00822	88.1648	1.09397	0.251042	4.35771	1.31433e-05	0.00017268	2R
ASTEI00823	286.089	0.393955	0.44336	0.888565	0.374237	0.659934	2R
ASTEI00824	508.962	0.122075	0.132084	0.924224	0.35537	0.642665	2R
ASTEI00825	144.915	-0.28711	0.205978	-1.39389	0.16335	0.394036	2R
ASTEI00826	0.631709	2.22507	2.31247	0.962205	0.335947	0.621231	2R
ASTEI00827	158.34	0.864276	0.258359	3.34525	0.000822089	0.00608378	2R
ASTEI00828	290.723	-0.062776	0.17771	-0.353249	0.723902	0.898853	2R
ASTEI00829	96.7651	0.511847	0.383377	1.3351	0.181844	0.425122	2R
ASTEI00830	371.477	-0.0364164	0.215098	-0.169301	0.86556	0.958347	2R
ASTEI00831	578.155	0.863249	0.303314	2.84605	0.00442646	0.0250346	2R
ASTEI00832	100.317	0.70821	0.185857	3.81052	0.000138676	0.00134364	2R
ASTEI00833	131.296	0.0424396	0.192449	0.220524	0.825463	0.946653	2R
ASTEI00834	373.05	0.321225	0.135556	2.36968	0.0178034	0.0768179	2R
ASTEI00835	204.822	-0.472294	0.245963	-1.92019	0.0548342	0.184137	2R
ASTEI00836	287.531	-0.0876479	0.165284	-0.530288	0.595912	0.834517	2R
ASTEI00837	75.9988	-0.234738	0.262929	-0.892781	0.371975	0.657915	2R
ASTEI00838	497.934	-0.288675	0.214058	-1.34858	0.177471	0.417209	2R
ASTEI00839	209.322	0.297275	0.39737	0.748106	0.454396	0.73229	2R
ASTEI00840	161.059	0.353712	0.719864	0.491359	0.623172	0.848873	2R
ASTEI00841	248.66	0.806768	0.167334	4.8213	1.42623e-06	2.42756e-05	2R
ASTEI00842	294.533	-0.242503	0.377188	-0.642923	0.520274	0.782125	2R
ASTEI00843	397.287	-0.164071	0.118773	-1.38138	0.167162	0.400486	2R
ASTEI00844	206.136	0.57781	0.253146	2.28252	0.0224586	0.0922284	2R
ASTEI00845	918.862	0.163565	0.182982	0.893887	0.371383	0.657539	2R
ASTEI00846	289.72	0.135363	0.172833	0.783204	0.433507	0.717624	2R
ASTEI00847	34.8828	0.227654	0.359745	0.632819	0.526852	0.78755	2R
ASTEI00848	491.785	-0.154374	0.150433	-1.0262	0.304798	0.587644	2R
ASTEI00849	76.949	1.08435	0.471255	2.30099	0.021392	0.0887751	2R
ASTEI00850	2637.01	-0.469776	0.195364	-2.40462	0.0161892	0.0713102	2R
ASTEI00851	234.626	0.110329	0.283266	0.389491	0.696913	0.886126	2R
ASTEI00852	269.715	0.483328	0.139278	3.47023	0.000520005	0.0041615	2R
ASTEI00853	1128.35	-0.516842	0.195127	-2.64875	0.00807908	0.040708	2R
ASTEI00854	254.924	-0.515655	0.472335	-1.09171	0.274958	0.553242	2R
ASTEI00855	240.136	-0.864302	0.363509	-2.37766	0.0174228	0.0755473	2R
ASTEI00856	129.074	0.245134	0.30327	0.808305	0.418915	0.703095	2R
ASTEI00857	185.192	0.0173683	0.545554	0.031836	0.974603	0.992266	2R
ASTEI00858	459.202	-0.245153	0.553141	-0.443201	0.65762	0.869004	2R
ASTEI00859	1610.39	-0.458208	0.205656	-2.22803	0.0258784	0.103405	2R
ASTEI00860	183.248	-0.902421	0.240384	-3.75408	0.000173977	0.00164241	2R
ASTEI00861	464.208	0.0714095	0.218993	0.32608	0.744364	0.909441	2R
ASTEI00862	93.3555	-0.0975162	0.324431	-0.300576	0.763738	0.919391	2R
ASTEI00863	143.379	0.0781809	0.291237	0.268444	0.788357	0.930121	2R
ASTEI00864	397.884	-0.00428432	0.168916	-0.0253636	0.979765	0.993408	2R
ASTEI00865	243.761	-0.168077	0.174834	-0.961354	0.336374	0.621527	2R
ASTEI00866	5.23331	-0.378486	0.739724	-0.511659	0.60889	0.841364	2R
ASTEI00868	524.085	-1.10296	0.274103	-4.0239	5.7242e-05	0.000635007	2R
ASTEI00869	56.0963	-0.154668	0.815815	-0.189588	0.849632	0.952747	2R
ASTEI00870	36.7406	0.204918	0.309985	0.661057	0.508576	0.774753	2R
ASTEI00871	2.2887	-0.879595	1.03137	-0.85284	0.393748	0.680143	2R
ASTEI00872	11.3874	0.461893	0.449421	1.02775	0.304068	0.586931	2R
ASTEI00873	60.8065	0.464639	0.40873	1.13679	0.255627	0.528044	2R
ASTEI00874	741.741	-0.561368	0.16763	-3.34885	0.000811471	0.00602867	2R
ASTEI00875	27.4099	0.70584	0.420287	1.67942	0.0930698	0.265143	2R
ASTEI00876	78.318	0.00805032	0.327826	0.0245567	0.980409	0.993653	2R
ASTEI00877	59.1803	0.586621	0.278169	2.10887	0.034956	0.131217	2R
ASTEI00878	6.6297	-0.00468158	0.850622	-0.00550371	0.995609	0.99841	2R
ASTEI00879	54.774	-0.830718	0.369622	-2.24748	0.0246094	0.0992032	2R
ASTEI00880	284.931	0.011818	0.156249	0.075636	0.939709	0.982063	2R
ASTEI00881	963.737	-0.277332	0.285118	-0.97269	0.330707	0.616358	2R
ASTEI00882	414.19	-1.63141	0.155299	-10.5049	8.1969e-26	3.22336e-23	2R
ASTEI00883	475.684	0.755947	0.153153	4.9359	7.97819e-07	1.46984e-05	2R
ASTEI00884	112.134	-0.603774	0.235113	-2.56802	0.0102282	0.0494893	2R
ASTEI00885	598.639	-0.149883	0.269805	-0.555524	0.578536	0.82316	2R
ASTEI00886	467.664	-0.916841	0.193704	-4.73321	2.20992e-06	3.51491e-05	2R
ASTEI00887	0.390762	0.638585	3.18411	0.200554	0.841047	0.951504	2R
ASTEI00888	675.268	-0.596224	0.18662	-3.19486	0.001399	0.00947397	2R
ASTEI00889	22.1055	0.253378	0.381898	0.663469	0.50703	0.773949	2R
ASTEI00890	249.586	0.389192	0.154188	2.52414	0.0115983	0.0547916	2R
ASTEI00891	103.312	0.345558	0.253466	1.36333	0.172779	0.410494	2R
ASTEI00892	0.160945	-1.17792	4.40746	-0.267256	0.789272	NA	2R
ASTEI00893	49.7024	-0.30456	0.367202	-0.829407	0.406874	0.692426	2R
ASTEI00895	174.84	0.164525	0.205016	0.802496	0.422266	0.705881	2R
ASTEI00896	119.581	0.430038	0.289107	1.48747	0.13689	0.349004	2R
ASTEI00897	222.976	0.0134622	0.245965	0.0547322	0.956352	0.986722	2R
ASTEI00898	2252.24	-0.0188317	0.196386	-0.0958916	0.923607	0.977591	2R
ASTEI00899	1437.71	-0.235935	0.15503	-1.52187	0.128041	0.332237	2R
ASTEI00900	797.173	-0.345796	0.294964	-1.17233	0.241064	0.510509	2R
ASTEI00901	534.979	0.796964	0.223335	3.56847	0.000359069	0.0030332	2R
ASTEI00902	153.046	0.869358	0.250671	3.46813	0.0005241	0.00418839	2R
ASTEI00903	35.3089	-0.382184	0.327418	-1.16727	0.243102	0.513016	2R
ASTEI00904	4.81998	1.98414	0.952083	2.08399	0.0371606	0.13719	2R
ASTEI00905	481.266	-0.47385	0.379797	-1.24764	0.212163	0.469968	2R
ASTEI00906	298.236	0.330666	0.246635	1.34071	0.180014	0.421796	2R
ASTEI00907	1392.93	0.807542	0.149627	5.39705	6.77469e-08	1.60955e-06	2R
ASTEI00908	110.621	0.979728	0.301629	3.24812	0.00116168	0.00812999	2R
ASTEI00909	49.4339	0.588607	0.319391	1.8429	0.0653432	0.207554	2R
ASTEI00910	36.6343	0.18901	0.279087	0.677245	0.498251	0.766825	2R
ASTEI00911	461.477	-0.527484	0.582256	-0.905931	0.364972	0.651353	2R
ASTEI00912	63.4111	-0.443996	0.358863	-1.23723	0.216001	0.475719	2R
ASTEI00913	2320.64	-0.416976	0.225095	-1.85244	0.0639622	0.204243	2R
ASTEI00914	186.703	1.0244	0.17804	5.75373	8.7293e-09	2.52023e-07	2R
ASTEI00915	166.196	0.584715	0.174222	3.35615	0.000790347	0.00588708	2R
ASTEI00916	189.453	0.0947233	0.155225	0.610234	0.541707	0.798147	2R
ASTEI00917	46.6982	0.236271	0.313008	0.754838	0.450346	0.729157	2R
ASTEI00918	161.84	0.507195	0.504638	1.00507	0.314865	0.600053	2R
ASTEI00919	307.687	-0.172576	0.22998	-0.750393	0.453018	0.731083	2R
ASTEI00920	501.666	0.523254	0.669855	0.781145	0.434717	0.71859	2R
ASTEI00921	6.17899	1.84353	0.819568	2.2494	0.0244873	0.0989206	2R
ASTEI00922	114.457	-0.0951316	0.63807	-0.149093	0.88148	0.966066	2R
ASTEI00923	1954.39	-1.07373	0.231943	-4.6293	3.66911e-06	5.59914e-05	2R
ASTEI00924	576.27	0.613626	0.198853	3.08583	0.00202983	0.0130486	2R
ASTEI00925	64.1005	-0.534355	0.612801	-0.871988	0.383215	0.669351	2R
ASTEI00926	76.7987	-0.193693	0.296778	-0.652653	0.51398	0.778928	2R
ASTEI00927	1133.39	-0.263305	0.167016	-1.57652	0.114905	0.309562	2R
ASTEI00928	2.17436	-0.246873	1.30555	-0.189094	0.850019	0.953064	2R
ASTEI00929	329.525	0.519478	0.702381	0.739596	0.459545	0.736668	2R
ASTEI00930	145.227	0.209692	1.04402	0.200851	0.840815	0.951387	2R
ASTEI00931	36.8506	0.154765	0.949146	0.163057	0.870474	0.960728	2R
ASTEI00932	113.889	0.263213	0.184242	1.42862	0.153113	0.378354	2R
ASTEI00933	205.032	0.0649589	0.544695	0.119257	0.905071	0.974183	2R
ASTEI00934	117.064	0.182326	0.28326	0.643668	0.519791	0.781708	2R
ASTEI00935	59.4958	-0.558608	0.326715	-1.70977	0.0873083	0.25272	2R
ASTEI00936	650.779	0.0255807	0.435478	0.0587417	0.953158	0.98587	2R
ASTEI00937	140.945	0.468325	0.390212	1.20018	0.230069	0.495406	2R
ASTEI00938	440.386	0.0251146	0.484826	0.0518013	0.958687	0.987676	2R
ASTEI00939	150.536	-0.223959	0.565688	-0.395906	0.692174	0.884847	2R
ASTEI00940	16.4563	0.689921	0.497184	1.38766	0.165242	0.397221	2R
ASTEI00941	24.7112	0.540097	0.340457	1.58639	0.112651	0.305439	2R
ASTEI00942	31.6146	-0.134068	0.339901	-0.394433	0.693261	0.885297	2R
ASTEI00943	132.639	0.284628	0.256404	1.11007	0.266967	0.543562	2R
ASTEI00944	142.564	-1.47827	0.270231	-5.47039	4.49042e-08	1.10126e-06	2R
ASTEI00945	128.645	0.639981	0.174252	3.67274	0.000239966	0.0021576	2R
ASTEI00946	532.9	-0.513933	0.267826	-1.91891	0.0549961	0.184355	2R
ASTEI00947	971.447	0.0751409	0.186285	0.403366	0.686679	0.882801	2R
ASTEI00948	360.72	0.306143	0.231562	1.32208	0.186143	0.431808	2R
ASTEI00949	935.623	-0.460743	0.184324	-2.49964	0.012432	0.0577726	2R
ASTEI00951	2.96787	-1.32977	1.17566	-1.13108	0.258023	0.531233	2R
ASTEI00952	212.768	0.231524	0.37302	0.620676	0.534813	0.792903	2R
ASTEI00953	97.4496	-0.811537	0.289093	-2.80719	0.00499764	0.0276665	2R
ASTEI00954	82.0761	0.121936	0.451181	0.27026	0.78696	0.92971	2R
ASTEI00955	16.3227	0.416411	0.732534	0.568453	0.569727	0.817792	2R
ASTEI00956	290.235	0.341544	0.581961	0.586884	0.557282	0.808702	2R
ASTEI00957	114.902	-0.167244	0.501959	-0.333183	0.738996	0.906671	2R
ASTEI00958	220.134	-0.178565	0.726884	-0.245658	0.805947	0.937668	2R
ASTEI00959	242.916	-0.569535	0.227648	-2.50182	0.0123555	0.0575346	2R
ASTEI00960	302.118	-1.13906	0.28096	-4.05417	5.03126e-05	0.000564174	2R
ASTEI00961	205.424	0.33368	0.185923	1.79472	0.0726981	0.223043	2R
ASTEI00962	98.5562	-0.0128078	0.263937	-0.0485259	0.961297	0.988099	2R
ASTEI00963	4.29681	1.36436	0.842881	1.61869	0.105514	0.291845	2R
ASTEI00964	18.9213	0.704991	0.377865	1.86572	0.0620802	0.200154	2R
ASTEI00965	83.945	1.1189	0.275597	4.05992	4.90888e-05	0.00055172	2R
ASTEI00966	3.24597	1.16008	0.975239	1.18953	0.234229	0.501342	2R
ASTEI00967	306.386	-0.487546	0.293898	-1.65889	0.0971374	0.273317	2R
ASTEI00968	44.4608	-0.833616	0.454395	-1.83456	0.0665704	0.210151	2R
ASTEI00969	589.131	0.0429864	0.135051	0.318297	0.75026	0.913221	2R
ASTEI00970	447.949	-0.428414	0.232405	-1.8434	0.065271	0.207464	2R
ASTEI00971	93.0968	-0.219568	0.220197	-0.997145	0.318694	0.604256	2R
ASTEI00972	224.953	0.125015	0.182502	0.685009	0.493338	0.764406	2R
ASTEI00973	719.7	-0.226788	0.272539	-0.83213	0.405336	0.690845	2R
ASTEI00974	104.955	0.297133	0.697791	0.42582	0.670239	0.875734	2R
ASTEI00975	22.8014	0.207398	0.596684	0.347585	0.728152	0.900498	2R
ASTEI00976	368.568	-0.0510049	0.221033	-0.230757	0.817504	0.943448	2R
ASTEI00977	77.6288	-0.579119	0.367218	-1.57704	0.114786	0.309509	2R
ASTEI00978	258.514	0.123813	0.544528	0.227377	0.820131	0.944306	2R
ASTEI00979	429.383	0.333661	0.216723	1.53957	0.123664	0.323976	2R
ASTEI00980	656.833	0.0738174	0.115333	0.640037	0.522148	0.783396	2R
ASTEI00981	361.745	-0.741568	0.162517	-4.56302	5.04219e-06	7.44833e-05	2R
ASTEI00982	188.88	0.029612	0.209886	0.141086	0.887802	0.968633	2R
ASTEI00983	120.945	0.351107	0.242563	1.44749	0.147761	0.368804	2R
ASTEI00984	534.768	0.219983	0.445098	0.494234	0.621141	0.848087	2R
ASTEI00985	197.677	0.19156	0.239005	0.801487	0.42285	0.706391	2R
ASTEI00986	555.413	-1.02465	0.412581	-2.48351	0.0130096	0.0598045	2R
ASTEI00987	167.816	-1.03855	0.194961	-5.32698	9.9861e-08	2.26405e-06	2R
ASTEI00989	754.212	0.0133715	0.124638	0.107283	0.914564	0.97481	X
ASTEI00990	9.80875	-0.877528	0.77302	-1.13519	0.256294	0.528998	X
ASTEI00991	8.09668	1.50324	0.616028	2.44022	0.0146785	0.0661633	X
ASTEI00992	451.027	0.28214	0.196153	1.43837	0.15033	0.373497	X
ASTEI00993	215.83	0.211096	0.165149	1.27822	0.201173	0.454753	X
ASTEI00994	368.255	-0.729558	0.441018	-1.65426	0.098075	0.275412	X
ASTEI00995	769.249	-0.0553693	0.176218	-0.314209	0.753362	0.914472	X
ASTEI00996	636.505	-0.353019	0.134477	-2.62513	0.00866149	0.0431146	X
ASTEI00997	174.224	-0.0421605	0.224833	-0.187519	0.851254	0.953622	X
ASTEI00998	164.877	0.29884	0.177331	1.68521	0.0919483	0.262539	X
ASTEI00999	258.083	-0.028198	0.229377	-0.122933	0.90216	0.973906	X
ASTEI01000	82.7396	0.268277	0.284143	0.94416	0.345088	0.631277	X
ASTEI01001	389.686	-0.0296216	0.249427	-0.118759	0.905467	0.974183	X
ASTEI01002	325.873	-0.246623	0.26324	-0.936874	0.348823	0.635663	X
ASTEI01003	66.51	-0.311116	0.350896	-0.886634	0.375276	0.661145	X
ASTEI01004	421.603	-0.304895	0.288576	-1.05655	0.290716	0.571846	X
ASTEI01005	114.093	-0.441755	0.58528	-0.754774	0.450384	0.729157	X
ASTEI01006	773.507	-1.47124	0.235772	-6.2401	4.37301e-10	1.65132e-08	X
ASTEI01007	873.823	-0.692067	0.231666	-2.98735	0.00281404	0.0171979	X
ASTEI01008	102.347	0.287282	0.455287	0.630992	0.528046	0.788147	X
ASTEI01009	252.389	0.646157	0.425766	1.51764	0.129106	0.334392	X
ASTEI01010	1023.41	-0.108756	0.147354	-0.738065	0.460475	0.737432	X
ASTEI01011	141.857	0.0271048	0.5382	0.0503619	0.959834	0.987832	X
ASTEI01012	490.737	-0.0907151	0.701509	-0.129314	0.897109	0.971648	X
ASTEI01013	84.7873	-0.528091	0.741037	-0.712638	0.47607	0.752161	X
ASTEI01014	213.066	-0.509175	0.352222	-1.44561	0.148286	0.369873	X
ASTEI01015	507.843	0.0823438	0.156293	0.526855	0.598294	0.83594	X
ASTEI01016	171.485	0.367931	0.263968	1.39385	0.163364	0.394036	X
ASTEI01017	127.324	0.17693	0.320518	0.552014	0.580939	0.82524	X
ASTEI01018	116.913	0.310816	1.11054	0.279878	0.779571	0.925487	X
ASTEI01019	27.3044	0.354269	0.626879	0.565131	0.571985	0.819462	X
ASTEI01020	273.322	-0.0745908	0.30864	-0.241676	0.809031	0.939627	X
ASTEI01021	337.269	-0.10921	0.777291	-0.140501	0.888264	0.968633	X
ASTEI01022	704.006	0.00828669	0.220915	0.0375108	0.970078	0.990216	X
ASTEI01023	177.266	0.106721	0.182999	0.583177	0.559774	0.81011	X
ASTEI01024	316.196	-0.449905	0.403422	-1.11522	0.264756	0.540992	X
ASTEI01025	23.5058	-0.0368915	0.334824	-0.110182	0.912265	0.97481	X
ASTEI01026	303.757	0.489981	0.194857	2.51457	0.0119179	0.0558848	X
ASTEI01027	209.71	0.283751	0.737809	0.384586	0.700544	0.887667	X
ASTEI01028	30.1724	0.0236693	0.536867	0.0440878	0.964834	0.98829	X
ASTEI01029	67.3883	0.0771588	0.436685	0.176692	0.85975	0.956889	X
ASTEI01030	246.526	0.249324	0.259033	0.96252	0.335788	0.62104	X
ASTEI01031	166.149	-0.12725	0.219598	-0.57947	0.562272	0.81187	X
ASTEI01032	273.864	0.449614	0.285521	1.57471	0.115323	0.310176	X
ASTEI01033	1787.23	-0.0671984	0.130921	-0.513275	0.607759	0.840473	X
ASTEI01034	129.062	-0.613879	0.375571	-1.63452	0.102149	0.284333	X
ASTEI01035	642.569	0.026688	0.206926	0.128973	0.897379	0.971648	X
ASTEI01036	165.337	-0.22286	0.199173	-1.11893	0.263171	0.538719	X
ASTEI01037	236.554	0.398833	0.233133	1.71076	0.0871259	0.252307	X
ASTEI01038	23.7539	0.126187	0.364513	0.346181	0.729207	0.90108	X
ASTEI01039	13.6307	0.262411	0.525304	0.499541	0.617399	0.845326	X
ASTEI01040	354.44	-0.143586	0.204312	-0.702777	0.482194	0.75535	X
ASTEI01041	139.61	-0.136436	0.225247	-0.605715	0.544704	0.800284	X
ASTEI01042	214.086	0.133009	0.251131	0.529637	0.596363	0.834777	X
ASTEI01043	0.936527	2.24769	1.72863	1.30027	0.193509	0.442765	X
ASTEI01044	53.8568	1.53367	0.326807	4.6929	2.69355e-06	4.21361e-05	X
ASTEI01045	631.304	-0.295714	0.131339	-2.25153	0.0243521	0.0985153	X
ASTEI01046	177.966	0.499483	0.405589	1.2315	0.218136	0.478141	X
ASTEI01047	544.341	-0.283543	0.679445	-0.417315	0.676448	0.878295	X
ASTEI01048	277.102	1.28983	0.172848	7.46221	8.50851e-14	5.74148e-12	X
ASTEI01049	455.906	-0.0907068	0.320952	-0.282618	0.77747	0.925295	X
ASTEI01050	99.434	-0.175817	0.465708	-0.377526	0.705782	0.890742	X
ASTEI01051	0.723263	-0.852135	1.93776	-0.439753	0.660116	0.870284	X
ASTEI01052	0.482006	0.74566	2.90052	0.257078	0.797119	0.933416	X
ASTEI01054	32.1756	-1.78459	0.436429	-4.08907	4.33111e-05	0.000494414	X
ASTEI01055	6.454	-0.371703	0.758438	-0.490091	0.62407	0.848904	X
ASTEI01056	7.29411	-1.23461	0.741706	-1.66455	0.0960026	0.271128	X
ASTEI01057	461.256	-0.465926	0.238752	-1.95151	0.0509964	0.174644	X
ASTEI01058	41.2203	-0.528112	0.305344	-1.72957	0.0837075	0.245651	X
ASTEI01059	420.684	-0.591988	0.218119	-2.71406	0.00664642	0.0351305	X
ASTEI01060	406.994	-0.31272	0.180895	-1.72874	0.0838554	0.245854	X
ASTEI01061	139.083	0.529726	0.203239	2.60643	0.00914926	0.045168	X
ASTEI01062	441.155	-0.0855879	0.239951	-0.356688	0.721325	0.89792	X
ASTEI01063	259.424	0.212029	0.165625	1.28017	0.200484	0.454266	X
ASTEI01064	137.879	-0.196396	0.211581	-0.928231	0.353288	0.640626	X
ASTEI01065	791.705	-0.466087	0.120701	-3.86149	0.000112697	0.00112835	X
ASTEI01066	315.144	0.229481	0.169467	1.35413	0.175694	0.414912	X
ASTEI01067	350.026	-0.159501	0.189703	-0.840795	0.400463	0.686542	X
ASTEI01068	159.611	-0.0383537	0.202325	-0.189565	0.84965	0.952747	X
ASTEI01069	66.8883	1.54948	0.463382	3.34385	0.000826242	0.00610263	X
ASTEI01070	1032.53	0.437125	0.1223	3.5742	0.000351307	0.00298532	X
ASTEI01071	4.13931	-0.554476	0.769669	-0.720409	0.471273	0.746755	X
ASTEI01072	649.584	-0.958524	0.192939	-4.96801	6.76451e-07	1.26256e-05	X
ASTEI01074	734.685	-1.2225	0.217014	-5.63328	1.76819e-08	4.80105e-07	X
ASTEI01075	197.391	0.548454	0.214527	2.55657	0.0105709	0.0506727	X
ASTEI01076	322.446	-0.193751	0.187738	-1.03203	0.302059	0.584439	X
ASTEI01077	508.227	0.093553	0.250118	0.374035	0.708378	0.891945	X
ASTEI01078	66.2968	0.238213	0.461862	0.515766	0.606018	0.839523	X
ASTEI01079	46.8623	-0.139671	0.595681	-0.234473	0.814618	0.942432	X
ASTEI01080	230.402	0.0872931	0.515892	0.169208	0.865633	0.958347	X
ASTEI01082	88.3853	1.09194	0.238708	4.57436	4.77667e-06	7.11773e-05	X
ASTEI01083	245.629	0.0490053	0.185011	0.264878	0.791104	0.931453	X
ASTEI01084	730.114	0.224027	0.560939	0.399378	0.689615	0.883743	X
ASTEI01085	221.496	-0.231639	0.389787	-0.594271	0.552331	0.805986	X
ASTEI01086	27.9048	-0.0431131	0.407642	-0.105762	0.915771	0.974994	X
ASTEI01087	2.79339	1.98498	1.38674	1.43141	0.152314	0.376705	X
ASTEI01088	40.0443	-0.159421	0.570958	-0.279217	0.780079	0.925814	X
ASTEI01089	1.20109	-0.218951	1.80562	-0.121261	0.903484	0.974183	X
ASTEI01090	131.664	0.0783065	0.406194	0.192781	0.84713	0.951829	X
ASTEI01091	164.627	0.175466	0.480921	0.364853	0.715221	0.89492	X
ASTEI01092	28.8159	0.177833	0.4527	0.392828	0.694447	0.885395	X
ASTEI01093	19.4234	0.754788	0.400219	1.88594	0.0593033	0.194114	X
ASTEI01094	152.172	0.305099	0.717665	0.425128	0.670744	0.875964	X
ASTEI01095	104.529	-0.231986	0.418054	-0.554919	0.57895	0.823543	X
ASTEI01096	78.8609	-0.237799	0.434906	-0.546783	0.584528	0.827337	X
ASTEI01097	87.8628	-0.170744	0.404786	-0.421814	0.673161	0.877055	X
ASTEI01098	25.733	-0.624247	0.427193	-1.46128	0.14394	0.3622	X
ASTEI01099	177.822	0.161728	0.199296	0.811496	0.417081	0.701251	X
ASTEI01100	476.568	-0.0143451	0.641929	-0.0223469	0.982171	0.993982	X
ASTEI01101	258.472	0.393784	0.528665	0.744865	0.456354	0.734013	X
ASTEI01102	468.23	0.41909	0.174395	2.4031	0.0162568	0.0714972	X
ASTEI01103	97.1921	-0.942179	0.286054	-3.29371	0.000988745	0.00708269	X
ASTEI01104	289.369	0.0720905	0.179895	0.400736	0.688615	0.883425	X
ASTEI01105	274.042	-0.516378	0.195487	-2.6415	0.00825394	0.0414295	X
ASTEI01106	62.8973	0.74948	0.32246	2.32426	0.0201117	0.0846635	X
ASTEI01107	341.868	0.298111	0.183105	1.62808	0.103507	0.287202	X
ASTEI01108	158.804	-0.00393598	0.20564	-0.0191402	0.984729	0.994937	X
ASTEI01109	55.1036	-0.511239	0.266391	-1.91913	0.0549675	0.184346	X
ASTEI01110	175.989	-0.918364	0.180555	-5.08633	3.65059e-07	7.21513e-06	X
ASTEI01111	158.09	0.401347	0.273033	1.46996	0.141574	0.357983	X
ASTEI01112	129.22	-0.130306	0.258931	-0.503244	0.614793	0.844749	X
ASTEI01113	6.80389	0.717841	0.801366	0.895772	0.370375	0.656528	X
ASTEI01114	104.711	0.137511	0.178945	0.768457	0.442216	0.72343	X
ASTEI01115	180.119	-0.0863499	0.188091	-0.459085	0.646173	0.861665	X
ASTEI01116	840.177	-0.123615	0.125367	-0.986025	0.324121	0.609678	X
ASTEI01117	91.5922	-0.187901	0.298994	-0.628444	0.529713	0.789276	X
ASTEI01118	4.97952	-0.205582	0.760387	-0.270365	0.78688	0.92971	X
ASTEI01119	10.5836	1.23375	0.523489	2.35678	0.0184341	0.0789256	X
ASTEI01120	46.5753	-0.0404746	0.377999	-0.107076	0.914729	0.97481	X
ASTEI01121	40.7858	0.408826	0.487164	0.839196	0.401359	0.686946	X
ASTEI01122	292.692	0.150969	0.459015	0.328897	0.742234	0.90861	X
ASTEI01123	760.483	0.0754163	0.366585	0.205727	0.837005	0.950426	X
ASTEI01124	47.5374	0.706034	0.443923	1.59044	0.111735	0.303821	X
ASTEI01125	1560.48	-0.162852	0.130308	-1.24975	0.21139	0.469006	X
ASTEI01126	15.4686	0.44423	0.439672	1.01037	0.31232	0.596759	X
ASTEI01127	463.954	0.221718	0.456829	0.485342	0.627434	0.850399	X
ASTEI01128	151.489	-0.513396	0.208628	-2.46083	0.0138617	0.0630047	X
ASTEI01129	72.5234	-0.00251299	0.283831	-0.00885381	0.992936	0.997775	X
ASTEI01130	63.9796	0.742053	0.545715	1.35978	0.173899	0.411974	X
ASTEI01131	1.9722	-0.217015	1.20433	-0.180195	0.856999	0.955529	X
ASTEI01132	257.921	-0.0536208	0.394143	-0.136044	0.891787	0.969673	X
ASTEI01133	5.68134	1.72499	0.881878	1.95604	0.0504607	0.173069	X
ASTEI01134	40.8521	2.55598	0.3664	6.97591	3.03889e-12	1.6988e-10	X
ASTEI01135	792.06	-0.608778	0.176826	-3.4428	0.000575721	0.00454047	X
ASTEI01136	539.427	-0.288216	0.508478	-0.566822	0.570835	0.818328	X
ASTEI01137	201.247	0.245112	0.268609	0.912523	0.361493	0.648037	X
ASTEI01138	132.047	-0.140519	0.271612	-0.517352	0.60491	0.838813	X
ASTEI01139	1550.61	-0.351889	0.16133	-2.18117	0.0291711	0.114319	X
ASTEI01140	1184.45	-0.245671	0.163537	-1.50223	0.133037	0.34147	X
ASTEI01141	446.692	-0.528294	0.123072	-4.29255	1.76631e-05	0.000223657	X
ASTEI01142	555.125	-0.0285358	0.141666	-0.20143	0.840363	0.951215	X
ASTEI01143	37.8234	0.18286	0.294072	0.621819	0.534061	0.792406	X
ASTEI01144	210.704	0.200163	0.43276	0.462526	0.643704	0.860395	X
ASTEI01145	38.918	0.68409	0.423219	1.6164	0.106008	0.292858	X
ASTEI01146	400.425	0.121524	0.62088	0.195729	0.844822	0.951829	X
ASTEI01147	207.605	-0.0922527	0.539647	-0.17095	0.864263	0.958347	X
ASTEI01148	82.0171	0.0463108	0.261521	0.177082	0.859444	0.956788	X
ASTEI01149	898.294	-0.321594	0.119951	-2.68104	0.00733932	0.0379933	X
ASTEI01150	172.37	-0.347113	0.152041	-2.28302	0.0224294	0.0922116	X
ASTEI01151	57.7872	0.143117	0.494823	0.289229	0.772406	0.923403	X
ASTEI01152	7.04565	-0.435147	0.623207	-0.698239	0.485028	0.75781	X
ASTEI01153	27.8834	0.239532	0.590662	0.405531	0.685087	0.882146	X
ASTEI01154	84.3534	0.3941	0.304884	1.29262	0.196142	0.447628	X
ASTEI01155	238.016	-0.415277	0.527562	-0.787162	0.431187	0.715341	X
ASTEI01156	16.6265	0.187234	0.487836	0.383806	0.701122	0.88771	X
ASTEI01157	241.942	-0.788861	0.397773	-1.9832	0.0473456	0.165267	X
ASTEI01158	328.559	0.787298	0.127532	6.17332	6.68693e-10	2.42088e-08	X
ASTEI01159	102.887	-0.0422966	0.4035	-0.104824	0.916515	0.974994	X
ASTEI01160	88.9284	0.806736	0.28226	2.85814	0.00426137	0.0243036	X
ASTEI01161	292.746	-0.210105	0.209367	-1.00353	0.315606	0.600742	X
ASTEI01162	596.525	-1.20397	0.463648	-2.59674	0.00941133	0.0462416	X
ASTEI01163	145.485	1.39395	0.336618	4.14104	3.45732e-05	0.000406048	X
ASTEI01164	64.6512	0.194244	0.485498	0.400092	0.689089	0.883658	X
ASTEI01165	854.725	-0.211986	0.300655	-0.705082	0.480759	0.754349	X
ASTEI01166	31.4321	0.470478	0.466152	1.00928	0.312841	0.597494	X
ASTEI01167	214.289	-0.60575	0.264655	-2.28883	0.0220893	0.090941	X
ASTEI01168	620.369	-0.352588	0.181184	-1.94602	0.0516525	0.176466	X
ASTEI01169	329.272	0.351987	0.139924	2.51556	0.0118844	0.0557673	X
ASTEI011690	0.168967	-0.216132	4.40746	-0.0490377	0.960889	NA	X
ASTEI01170	31.4259	-1.79631	0.777072	-2.31164	0.0207978	0.0868784	X
ASTEI01171	69.8794	-2.56942	0.451635	-5.68916	1.27665e-08	3.54233e-07	X
ASTEI01172	23.2973	1.44666	0.534414	2.707	0.00678936	0.035746	X
ASTEI01173	2.07522	1.27955	1.62343	0.788177	0.430593	0.714981	X
ASTEI01174	12.2213	0.149222	0.486405	0.306787	0.759006	0.91755	X
ASTEI01176	7.82736	1.63336	0.631402	2.58688	0.00968485	0.047382	X
ASTEI01177	0.597649	-0.216133	2.26348	-0.0954873	0.923928	0.977591	X
ASTEI01178	123.505	1.66184	0.279818	5.939	2.86761e-09	9.1347e-08	X
ASTEI01179	403.953	-1.53046	0.197896	-7.73365	1.04508e-14	8.27643e-13	X
ASTEI01180	1019.83	-0.412314	0.195532	-2.10868	0.0349723	0.131235	X
ASTEI01181	224.928	-0.594982	0.17434	-3.41276	0.000643079	0.00496861	X
ASTEI01182	293.673	-0.145207	0.585844	-0.247859	0.804243	0.93712	X
ASTEI01183	35.6599	-0.239199	0.516924	-0.462735	0.643554	0.860395	X
ASTEI01184	1049.9	0.261246	0.48269	0.54123	0.588349	0.830593	X
ASTEI01185	779.739	1.08104	0.122803	8.80308	1.33113e-18	1.82894e-16	X
ASTEI01186	5.99157	0.451334	0.64909	0.695333	0.486847	0.759456	X
ASTEI01188	21.536	0.393841	0.386974	1.01775	0.308798	0.592371	X
ASTEI01189	129.999	-0.496013	0.5742	-0.863833	0.38768	0.674359	X
ASTEI01190	107.442	0.15532	0.467029	0.33257	0.739459	0.907031	X
ASTEI01191	0.154889	-0.216132	4.40746	-0.0490377	0.960889	NA	X
ASTEI01192	492.392	0.0431399	0.770377	0.0559984	0.955343	0.986306	X
ASTEI01193	355	-0.00615717	0.481833	-0.0127787	0.989804	0.996885	X
ASTEI01194	284.744	0.306727	0.425265	0.721262	0.470748	0.746235	X
ASTEI01195	375.278	0.17539	0.399495	0.439029	0.66064	0.870284	X
ASTEI01196	143.057	0.133979	0.188483	0.710828	0.477191	0.752849	X
ASTEI01197	75.2243	0.359315	0.478891	0.750306	0.45307	0.731083	X
ASTEI01198	1387.46	-0.242266	0.185621	-1.30516	0.191838	0.440629	X
ASTEI01199	335.423	-0.29836	0.339444	-0.878967	0.379419	0.665063	X
ASTEI01200	236.563	0.274924	0.574625	0.478441	0.632337	0.852536	X
ASTEI01201	42.4732	0.221607	0.331173	0.669158	0.503395	0.771596	X
ASTEI01202	40.8821	-1.51606	0.337024	-4.49837	6.84759e-06	9.81029e-05	X
ASTEI01203	148.621	0.612764	0.555437	1.10321	0.269936	0.546799	X
ASTEI01204	93.7684	-0.0597588	0.273906	-0.218173	0.827295	0.947331	X
ASTEI01205	412.676	0.361184	0.151726	2.3805	0.0172892	0.0752253	X
ASTEI01206	262.128	-0.0363883	0.193949	-0.187618	0.851177	0.953622	X
ASTEI01207	171.449	-0.0302318	0.279278	-0.10825	0.913797	0.97481	X
ASTEI01208	109.33	-0.0667977	0.24288	-0.275024	0.783298	0.92735	X
ASTEI01209	201.792	0.629045	0.203254	3.09487	0.00196902	0.0127438	X
ASTEI01210	326.168	-0.621138	0.154183	-4.02858	5.6116e-05	0.000624338	X
ASTEI01211	659.386	-0.237753	0.16609	-1.43147	0.152296	0.376705	X
ASTEI01212	124.52	-0.0969159	0.253247	-0.382693	0.701947	0.887965	X
ASTEI01213	296.034	0.0854312	0.200357	0.426395	0.66982	0.875734	X
ASTEI01214	273.884	-0.135118	0.478662	-0.282284	0.777726	0.925295	X
ASTEI01215	53.0143	-0.0415479	0.487528	-0.0852217	0.932085	0.979853	X
ASTEI01216	192.863	0.241905	0.218972	1.10473	0.269275	0.545923	X
ASTEI01217	140.187	-0.410264	0.259572	-1.58054	0.113984	0.308026	X
ASTEI01218	146.846	-0.88542	0.217967	-4.06217	4.86187e-05	0.000547333	X
ASTEI01219	570.352	-0.177394	0.234729	-0.755736	0.449807	0.728987	X
ASTEI01220	470.533	-0.0998215	0.150594	-0.662853	0.507425	0.774137	X
ASTEI01221	96.9803	0.449137	0.357728	1.25553	0.209287	0.46694	X
ASTEI01222	4.521	2.65066	0.909746	2.91362	0.0035726	0.0210118	X
ASTEI01223	140.716	0.355689	0.480259	0.740619	0.458924	0.73619	X
ASTEI01224	1.84146	5.04873	1.69987	2.97007	0.00297732	0.0180161	X
ASTEI01225	10.6095	0.274633	0.876486	0.313334	0.754027	0.914995	X
ASTEI01226	930.987	-0.209361	0.720636	-0.290522	0.771417	0.923401	X
ASTEI01227	54.6321	-0.359121	0.655654	-0.547729	0.583878	0.827004	X
ASTEI01228	292.789	0.399273	0.226822	1.76029	0.0783584	0.235405	X
ASTEI01229	20.1366	-1.39014	0.694368	-2.00202	0.0452825	0.159531	X
ASTEI01230	309.461	-1.46239	0.530858	-2.75476	0.00587349	0.0316846	X
ASTEI01231	1374.64	-0.275701	0.157611	-1.74925	0.0802485	0.238958	X
ASTEI01232	82.5945	-0.117312	0.242019	-0.484724	0.627872	0.850617	X
ASTEI01233	735.382	-1.02129	0.157049	-6.50303	7.8718e-11	3.37481e-09	X
ASTEI01234	682.258	0.486845	0.270441	1.80019	0.0718304	0.221214	X
ASTEI01235	81.4951	0.129059	0.666694	0.19358	0.846504	0.951829	X
ASTEI01236	443.698	-0.0682181	1.03921	-0.065644	0.947661	0.98408	X
ASTEI01237	894.344	0.281969	0.48863	0.577059	0.563899	0.813293	X
ASTEI01238	372.786	-0.152978	0.571438	-0.267706	0.788925	0.930407	X
ASTEI01239	81.9141	-0.232638	0.328502	-0.70818	0.478834	0.753655	X
ASTEI01240	767.526	0.186343	0.343505	0.542474	0.587492	0.829955	X
ASTEI01242	414.066	-0.217094	0.760251	-0.285556	0.775218	0.924564	X
ASTEI01243	5.30811	0.58293	0.817488	0.713075	0.475799	0.752114	X
ASTEI01244	596.419	1.14987	0.131106	8.77051	1.77855e-18	2.35844e-16	X
ASTEI01245	210.931	0.747424	0.291725	2.56209	0.0104045	0.0501068	X
ASTEI01246	109.053	-0.292938	0.725002	-0.404051	0.686175	0.882601	X
ASTEI01247	258.827	-0.330815	0.791589	-0.417913	0.676011	0.878044	X
ASTEI01248	475.325	-0.143987	0.680408	-0.211619	0.832405	0.949734	X
ASTEI01249	1053.64	-0.53425	0.133433	-4.0039	6.23077e-05	0.00067866	X
ASTEI01250	13.3989	0.531212	0.556559	0.954457	0.339853	0.624807	X
ASTEI01251	14.2663	0.369453	0.640019	0.577253	0.563768	0.813293	X
ASTEI01252	17.2829	0.908131	0.533619	1.70183	0.0887869	0.255655	X
ASTEI01253	13.2121	0.0962607	0.612732	0.157101	0.875165	0.963218	X
ASTEI01254	40.8549	0.132017	0.599436	0.220235	0.825688	0.946653	X
ASTEI01255	136.693	0.0820142	0.265482	0.308925	0.757378	0.91685	X
ASTEI01256	1265.93	0.0751076	0.236556	0.317505	0.750861	0.913639	X
ASTEI01257	17.1857	-1.26509	0.521092	-2.42777	0.015192	0.0679943	3L
ASTEI01258	1.64297	2.27082	1.44326	1.5734	0.115626	0.310717	3L
ASTEI01259	11.2306	3.78814	0.756692	5.00619	5.55192e-07	1.0561e-05	3L
ASTEI01260	7.58286	5.26621	1.12614	4.67635	2.9202e-06	4.54325e-05	3L
ASTEI01261	5.74257	1.12956	0.890829	1.26798	0.204804	0.459919	3L
ASTEI01262	60.9817	2.96074	0.432688	6.84267	7.77309e-12	4.01105e-10	3L
ASTEI01263	489.149	-0.271532	0.582828	-0.465888	0.641296	0.859685	3L
ASTEI01264	8.00132	0.694015	0.567458	1.22303	0.22132	0.48305	3L
ASTEI01265	476.967	-0.217752	0.231451	-0.940811	0.346802	0.632992	3L
ASTEI01266	131.183	-0.640955	0.437904	-1.46369	0.14328	0.361336	3L
ASTEI01267	131.566	0.288331	0.230371	1.25159	0.210718	0.468244	3L
ASTEI01268	777.921	-0.436276	0.183753	-2.37425	0.0175845	0.076083	3L
ASTEI01269	1404.64	-0.59069	0.105869	-5.57947	2.41254e-08	6.29579e-07	3L
ASTEI01270	672.901	0.0495425	0.211674	0.234052	0.814945	0.942463	3L
ASTEI01271	81.6218	0.188036	0.271115	0.693567	0.487954	0.760366	3L
ASTEI01272	574.961	-0.168366	0.193192	-0.871494	0.383485	0.669351	3L
ASTEI01273	369.37	-0.905889	0.36142	-2.50647	0.0121944	0.0569704	3L
ASTEI01274	1034.52	0.267514	0.378634	0.706524	0.479862	0.754211	3L
ASTEI01275	1.1909	1.34425	1.53514	0.875654	0.381218	0.666911	3L
ASTEI01276	437.987	0.419783	0.195125	2.15136	0.031448	0.121147	3L
ASTEI01277	120.899	0.235062	0.215529	1.09063	0.275437	0.553788	3L
ASTEI01278	186.854	0.248904	0.20212	1.23147	0.218149	0.478141	3L
ASTEI01279	81.0889	-0.229916	0.417538	-0.550646	0.581876	0.825543	3L
ASTEI01280	254.132	-0.159746	0.18824	-0.848631	0.396087	0.681638	3L
ASTEI01281	4.75647	1.95671	0.745935	2.62317	0.00871168	0.0433078	3L
ASTEI01282	891.058	-0.0274735	0.143382	-0.191611	0.848047	0.95235	3L
ASTEI01283	749.4	-0.187167	0.163707	-1.14331	0.252911	0.524607	3L
ASTEI01284	74.0947	-0.78048	0.249337	-3.13022	0.00174675	0.0114548	3L
ASTEI012841	178.141	0.628141	0.214578	2.92733	0.00341884	0.0202327	3L
ASTEI01285	76.7087	-0.208544	0.277295	-0.752063	0.452013	0.730446	3L
ASTEI01286	242.709	-0.110106	0.281227	-0.391521	0.695412	0.885395	3L
ASTEI01287	143.265	-0.251576	0.172136	-1.4615	0.143879	0.362126	3L
ASTEI01288	65.4682	-0.645792	0.260191	-2.48199	0.0130652	0.060006	3L
ASTEI01289	95.0395	0.711555	0.267109	2.66391	0.00772379	0.0394104	3L
ASTEI01290	106.839	0.838806	0.267287	3.13823	0.00169974	0.0112045	3L
ASTEI01291	1.07224	1.36943	1.63397	0.8381	0.401975	0.687584	3L
ASTEI01292	23.8975	-0.124106	0.376229	-0.329867	0.7415	0.908165	3L
ASTEI01294	21.2214	0.645338	0.544592	1.18499	0.23602	0.503425	3L
ASTEI01295	93.955	0.65966	0.413946	1.59359	0.111028	0.302332	3L
ASTEI01296	455.771	-0.335121	0.361692	-0.926536	0.354168	0.641609	3L
ASTEI01297	649.803	0.0416507	0.332596	0.125229	0.900342	0.972854	3L
ASTEI01298	211.071	0.142814	0.421136	0.339115	0.734523	0.904101	3L
ASTEI01299	110.897	0.650244	0.473886	1.37215	0.170016	0.40573	3L
ASTEI01300	1.08111	-2.91515	1.66524	-1.75059	0.0800171	0.238566	3L
ASTEI01301	0.900418	-0.216718	1.56663	-0.138334	0.889977	0.968828	3L
ASTEI01302	637.795	-0.531362	0.185212	-2.86894	0.00411851	0.0236493	3L
ASTEI01303	23.041	-0.00486906	0.527534	-0.00922986	0.992636	0.997775	3L
ASTEI01304	180.629	-0.249078	0.176933	-1.40775	0.159204	0.388355	3L
ASTEI01305	64.1569	-0.676618	0.272317	-2.48467	0.0129672	0.0596524	3L
ASTEI01306	358.941	0.250476	0.729111	0.343536	0.731195	0.901794	3L
ASTEI01307	618.62	-0.62337	0.583901	-1.06759	0.285703	0.565358	3L
ASTEI01308	129.286	-3.80606	0.503141	-7.56461	3.89035e-14	2.73861e-12	3L
ASTEI01309	278.078	-1.89437	0.317655	-5.9636	2.46739e-09	7.99378e-08	3L
ASTEI01310	274.113	0.148753	0.269893	0.551155	0.581527	0.825459	3L
ASTEI01311	592.347	0.0312306	0.244374	0.127799	0.898308	0.97213	3L
ASTEI01312	436.644	0.0877419	0.595619	0.147312	0.882886	0.966817	3L
ASTEI01313	134.312	0.131707	0.734509	0.179313	0.857692	0.955529	3L
ASTEI01314	61.827	0.138178	0.811557	0.170262	0.864804	0.958347	3L
ASTEI01315	7.65771	0.283459	0.572561	0.495072	0.620549	0.847717	3L
ASTEI01316	895.277	0.180257	0.185211	0.973251	0.330429	0.616123	3L
ASTEI01317	42.6474	3.73351	0.662214	5.63792	1.72119e-08	4.68461e-07	3L
ASTEI01318	870.531	0.0320892	0.163816	0.195886	0.844699	0.951829	3L
ASTEI01319	216.718	1.34835	0.186528	7.22866	4.87791e-13	2.99074e-11	3L
ASTEI01320	173.036	-0.715144	0.266204	-2.68645	0.00722158	0.0375878	3L
ASTEI01321	194.858	-0.550707	0.143035	-3.85016	0.000118041	0.00117876	3L
ASTEI01322	29.6041	1.20756	0.443542	2.72254	0.00647824	0.034474	3L
ASTEI01323	1636.68	-0.283559	0.262556	-1.07999	0.280146	0.559115	3L
ASTEI01324	171.044	0.638531	0.308433	2.07024	0.0384296	0.1406	3L
ASTEI01325	24.6682	0.420404	0.493182	0.852431	0.393975	0.680431	3L
ASTEI01326	0.573179	1.61193	2.26823	0.710654	0.477298	0.752851	3L
ASTEI01327	14.5594	1.94094	0.525975	3.69018	0.000224098	0.00204612	3L
ASTEI01328	232.121	0.419205	0.268301	1.56245	0.118183	0.314824	3L
ASTEI01329	98.2359	-1.98309	0.298895	-6.63473	3.25108e-11	1.49497e-09	3L
ASTEI01330	182.951	-0.146325	0.52457	-0.278942	0.780289	0.925814	3L
ASTEI01331	276.483	-0.333028	0.20013	-1.66406	0.0961005	0.271203	3L
ASTEI01332	330.755	-0.153432	0.160801	-0.954176	0.339995	0.624967	3L
ASTEI01333	250.189	0.280697	0.292198	0.960641	0.336732	0.621878	3L
ASTEI01334	76.7797	-0.317647	0.230486	-1.37816	0.168153	0.402371	3L
ASTEI01335	212.01	-0.83905	0.326764	-2.56775	0.010236	0.0494893	3L
ASTEI01336	626.779	-0.236422	0.189329	-1.24874	0.211761	0.469465	3L
ASTEI01337	401.617	-0.00374832	0.142774	-0.0262535	0.979055	0.993339	3L
ASTEI01338	817.861	-1.11706	0.200016	-5.58484	2.33918e-08	6.1324e-07	3L
ASTEI01339	124.048	-0.57059	0.235383	-2.42409	0.015347	0.0684461	3L
ASTEI01340	262.263	0.452316	0.210324	2.15057	0.0315102	0.121211	3L
ASTEI01341	378.225	-0.523716	0.20924	-2.50295	0.0123164	0.0574154	3L
ASTEI01342	170.485	0.147004	0.208547	0.704897	0.480874	0.754349	3L
ASTEI01343	1129.2	0.725031	0.531606	1.36385	0.172615	0.410189	3L
ASTEI01344	209.08	-1.02889	0.269775	-3.81388	0.000136802	0.00132774	3L
ASTEI01345	235.688	0.126774	0.160955	0.787636	0.430909	0.715144	3L
ASTEI01346	17.4544	0.246059	0.396654	0.620338	0.535035	0.792936	3L
ASTEI01347	382.184	-0.999575	0.224851	-4.44549	8.76914e-06	0.000121069	3L
ASTEI01348	84.2583	0.701996	0.265568	2.64338	0.00820833	0.0412188	3L
ASTEI01349	874.225	0.172301	0.102152	1.68671	0.0916584	0.261842	3L
ASTEI01350	333.336	0.425537	0.212931	1.99847	0.0456658	0.160435	3L
ASTEI01351	280.231	0.614538	0.20359	3.0185	0.00254026	0.0158305	3L
ASTEI01352	753.625	-0.156355	0.337695	-0.463005	0.643361	0.860395	3L
ASTEI01353	510.701	-0.106655	0.203691	-0.523614	0.600547	0.836755	3L
ASTEI01354	97.0495	-0.0694674	0.273804	-0.253712	0.799718	0.93452	3L
ASTEI01355	259.738	-0.5356	0.158304	-3.38337	0.000716026	0.00542562	3L
ASTEI01356	855.139	-0.0457153	0.196608	-0.23252	0.816134	0.942845	3L
ASTEI01357	116.424	-0.443161	0.206447	-2.14661	0.0318247	0.12187	3L
ASTEI01358	102.833	0.0121456	0.297599	0.0408119	0.967446	0.989094	3L
ASTEI01359	2609.04	-0.299092	0.120198	-2.48834	0.0128342	0.0592923	3L
ASTEI01360	348.22	-0.177716	0.241014	-0.73737	0.460898	0.737695	3L
ASTEI01361	136.667	-1.77445	0.451358	-3.93136	8.4467e-05	0.000877288	3L
ASTEI01362	7.83183	2.15483	0.711932	3.02673	0.00247212	0.0154562	3L
ASTEI01363	10.5897	5.34642	1.27486	4.19372	2.74418e-05	0.000331862	3L
ASTEI01364	372.823	0.201946	0.44975	0.449018	0.653419	0.866464	3L
ASTEI01365	140.006	-0.167127	0.226395	-0.73821	0.460387	0.737432	3L
ASTEI01366	203.403	-0.223884	0.248923	-0.899408	0.368435	0.654665	3L
ASTEI01367	219.224	-0.598993	0.185501	-3.22905	0.00124203	0.00859471	3L
ASTEI01368	378.25	-0.613821	0.383641	-1.59999	0.109601	0.299447	3L
ASTEI01369	222.332	-1.43659	0.248462	-5.78194	7.38425e-09	2.17597e-07	3L
ASTEI01370	358.51	-0.270389	0.435957	-0.620219	0.535114	0.792936	3L
ASTEI01371	69.2107	1.57673	0.262697	6.00209	1.9479e-09	6.42018e-08	3L
ASTEI01372	45.4807	0.166233	0.385898	0.430768	0.666637	0.87397	3L
ASTEI01373	48.1959	-0.0464322	0.330536	-0.140475	0.888284	0.968633	3L
ASTEI01374	100.377	-0.392325	0.352906	-1.1117	0.266268	0.542526	3L
ASTEI01375	28.0836	-0.211136	0.331211	-0.637467	0.523821	0.784768	3L
ASTEI01376	6.98771	1.13672	0.649079	1.75128	0.0798981	0.238445	3L
ASTEI01377	501.591	-0.471039	0.427383	-1.10215	0.270397	0.547515	3L
ASTEI01378	13.2497	2.13088	0.481592	4.42465	9.65966e-06	0.000131298	3L
ASTEI01379	55.3131	0.1797	0.388215	0.462888	0.643445	0.860395	3L
ASTEI01380	320.18	-0.184524	0.398554	-0.462985	0.643375	0.860395	3L
ASTEI01381	1.20135	0.492299	1.41433	0.348079	0.727781	0.900377	3L
ASTEI01382	3.46417	-0.65358	0.840461	-0.777645	0.436778	0.720403	3L
ASTEI01383	1.92828	-2.30019	1.35481	-1.6978	0.0895459	0.257289	3L
ASTEI01384	1.65505	-0.793294	1.06626	-0.743996	0.456879	0.734439	3L
ASTEI01385	22.6816	-0.0166666	0.634004	-0.0262879	0.979028	0.993339	3L
ASTEI01386	103.373	-0.200581	0.782609	-0.256298	0.797721	0.933416	3L
ASTEI01387	19.3851	0.0985752	0.413702	0.238276	0.811667	0.941059	3L
ASTEI01388	716.408	-0.117285	0.195616	-0.599568	0.548794	0.803705	3L
ASTEI01389	4.97061	0.404581	0.670548	0.603359	0.54627	0.801692	3L
ASTEI01390	6.70851	0.0263718	0.593712	0.0444184	0.964571	0.98829	3L
ASTEI01391	135.232	-0.20791	0.286857	-0.724785	0.468584	0.744148	3L
ASTEI01392	121.397	-0.101577	0.297035	-0.341971	0.732373	0.9027	3L
ASTEI01393	382.494	0.794536	0.165873	4.79004	1.66748e-06	2.78826e-05	3L
ASTEI01394	1952.38	-0.177834	0.545546	-0.325973	0.744444	0.909442	3L
ASTEI01395	316.182	-0.300736	0.245765	-1.22367	0.221076	0.482701	3L
ASTEI01396	92.9117	0.0668178	0.285992	0.233635	0.815268	0.942696	3L
ASTEI01397	72.7714	1.21774	0.33204	3.66744	0.000244993	0.00219295	3L
ASTEI01398	802.299	-0.522743	0.521679	-1.00204	0.316325	0.601328	3L
ASTEI01399	59.4764	-1.29425	0.367871	-3.51821	0.000434472	0.00355687	3L
ASTEI01400	1222.42	-0.411284	0.20303	-2.02574	0.0427919	0.152547	3L
ASTEI01401	324.356	-1.17433	0.34246	-3.4291	0.000605586	0.0047367	3L
ASTEI01402	140.099	-1.29934	0.31076	-4.18116	2.90026e-05	0.000348141	3L
ASTEI01403	199.593	-0.816075	0.156243	-5.2231	1.75951e-07	3.72272e-06	3L
ASTEI01404	273.917	-0.169612	0.225582	-0.751887	0.452119	0.730514	3L
ASTEI01405	935.624	-0.790529	0.141766	-5.57629	2.45703e-08	6.39725e-07	3L
ASTEI01406	105.923	0.335299	0.263264	1.27362	0.202797	0.457044	3L
ASTEI01407	143.96	-0.181578	0.239932	-0.756788	0.449177	0.728962	3L
ASTEI01408	679.358	-0.265291	0.20374	-1.3021	0.192882	0.442217	3L
ASTEI01409	15.2384	0.901781	0.492739	1.83014	0.0672293	0.211499	3L
ASTEI01410	2.85467	0.687157	1.15337	0.595781	0.551321	0.805544	3L
ASTEI01411	15.1527	-0.0327798	0.42658	-0.0768434	0.938748	0.981975	3L
ASTEI01412	235.01	-0.468174	0.243539	-1.92238	0.0545578	0.183587	3L
ASTEI01413	68.2993	0.291597	0.265016	1.1003	0.271201	0.548463	3L
ASTEI01414	105.69	0.318932	0.311777	1.02295	0.306333	0.590204	3L
ASTEI01415	307.379	-0.196444	0.117809	-1.66748	0.0954197	0.269815	3L
ASTEI01416	32.0296	-0.270155	0.405491	-0.666241	0.505257	0.772794	3L
ASTEI01417	491.91	-0.333183	0.520638	-0.639951	0.522204	0.783396	3L
ASTEI01418	306.633	-0.349479	0.347431	-1.00589	0.314466	0.599739	3L
ASTEI01419	345.624	-0.223182	0.202323	-1.1031	0.269985	0.546799	3L
ASTEI01420	185.302	-0.177262	0.222742	-0.795821	0.426136	0.709646	3L
ASTEI01421	160.031	0.556547	0.267961	2.07697	0.0378045	0.139027	3L
ASTEI01422	329.95	-0.604018	0.186354	-3.24124	0.00119013	0.00827575	3L
ASTEI01423	96.9859	0.0930363	0.310674	0.299466	0.764585	0.919988	3L
ASTEI01424	730.914	0.116811	0.110017	1.06175	0.28835	0.568602	3L
ASTEI01425	298.455	-0.148919	0.568499	-0.261951	0.793359	0.93196	3L
ASTEI01426	48.8284	0.134424	0.243671	0.551662	0.58118	0.825274	3L
ASTEI01427	518.302	-0.115774	0.129929	-0.891059	0.372898	0.658795	3L
ASTEI01428	360.131	-0.228084	0.214312	-1.06426	0.28721	0.567551	3L
ASTEI01429	278.133	-0.361558	0.223013	-1.62124	0.104966	0.290682	3L
ASTEI01430	401.135	0.460335	0.439837	1.0466	0.295283	0.577303	3L
ASTEI01431	214.962	-0.265152	0.209228	-1.26729	0.205052	0.460318	3L
ASTEI01432	62.0437	0.081484	0.708642	0.114986	0.908456	0.974183	3L
ASTEI01433	1240.81	-0.0324151	0.50451	-0.0642506	0.948771	0.984153	3L
ASTEI01434	144.723	0.0728248	0.233361	0.31207	0.754987	0.915652	3L
ASTEI01435	686.154	-0.227442	0.212977	-1.06792	0.285556	0.565222	3L
ASTEI01436	187.62	0.0482802	0.264201	0.18274	0.855002	0.954709	3L
ASTEI01437	515.634	-0.578283	0.413893	-1.39718	0.162359	0.392693	3L
ASTEI01438	623.63	-0.567819	0.157848	-3.59725	0.000321598	0.00276584	3L
ASTEI01439	907.719	0.497157	0.495876	1.00258	0.316061	0.601172	3L
ASTEI01440	65.3836	0.619268	0.477919	1.29576	0.195059	0.445514	3L
ASTEI01441	1288.96	-0.575502	0.187097	-3.07595	0.00209831	0.013466	3L
ASTEI01442	365.068	-0.486411	0.528868	-0.919722	0.357718	0.645223	3L
ASTEI01443	101.306	-0.587063	0.373213	-1.573	0.11572	0.310825	3L
ASTEI01444	222.489	0.209974	0.704767	0.297934	0.765754	0.920584	3L
ASTEI01445	115.369	-1.05153	0.495817	-2.1208	0.0339385	0.128327	3L
ASTEI01446	492.621	-1.046	0.315994	-3.31018	0.000932362	0.00678536	3L
ASTEI01447	82.3372	0.113648	0.564003	0.201503	0.840305	0.951215	3L
ASTEI01448	637.172	0.692234	0.185759	3.72651	0.000194151	0.00180448	3L
ASTEI01449	388.583	-0.449064	0.200174	-2.24337	0.0248729	0.100088	3L
ASTEI01450	353.783	-0.195989	0.214342	-0.914375	0.36052	0.647429	3L
ASTEI01451	50.9085	2.39619	0.320675	7.47232	7.87906e-14	5.34838e-12	3L
ASTEI01453	925.661	0.106919	0.202802	0.527207	0.59805	0.835804	3L
ASTEI01454	83.5828	-0.302455	0.320089	-0.94491	0.344705	0.630779	3L
ASTEI01455	24.0776	-0.0734115	0.586004	-0.125275	0.900306	0.972854	3L
ASTEI01456	1985.16	-0.594923	0.216622	-2.74636	0.00602598	0.0323847	3L
ASTEI01457	483.05	1.20149	0.165114	7.27674	3.4199e-13	2.12878e-11	3L
ASTEI01458	161.407	0.859585	0.219955	3.90801	9.30592e-05	0.000955218	3L
ASTEI01459	55.3147	0.880415	0.382715	2.30045	0.0214229	0.0888387	3L
ASTEI01460	152.776	-0.920932	0.219719	-4.19141	2.77222e-05	0.000334544	3L
ASTEI01461	474.624	-1.82295	0.22785	-8.00064	1.23773e-15	1.15698e-13	3L
ASTEI01462	469.479	-0.783186	0.242965	-3.22346	0.00126652	0.00872714	3L
ASTEI01463	994.346	-0.514153	0.16582	-3.10067	0.00193086	0.0125253	3L
ASTEI01464	69.2818	-0.957166	0.293028	-3.26647	0.00108898	0.00769517	3L
ASTEI01465	2958.01	-0.359487	0.401341	-0.895715	0.370405	0.656528	3L
ASTEI01466	4382.26	0.254932	0.448173	0.568824	0.569476	0.817716	3L
ASTEI01467	2.45965	0.380578	0.901659	0.422087	0.672962	0.877055	3L
ASTEI01468	417.016	0.556327	0.16747	3.32194	0.000893926	0.00653483	3L
ASTEI01469	150.298	0.293728	0.280734	1.04629	0.295428	0.57742	3L
ASTEI01470	650.741	-0.664398	0.424307	-1.56584	0.117385	0.31343	3L
ASTEI01471	71.7038	0.280649	0.326202	0.860354	0.389594	0.676372	3L
ASTEI01472	55.6984	-0.450872	0.292235	-1.54284	0.12287	0.322933	3L
ASTEI01473	367.344	-0.0523822	0.241606	-0.216809	0.828358	0.947882	3L
ASTEI01474	355.553	0.0932084	0.254344	0.366465	0.714018	0.894405	3L
ASTEI01475	390.946	-0.153553	0.68316	-0.224768	0.82216	0.944915	3L
ASTEI01476	528.681	-0.0479381	0.205528	-0.233243	0.815572	0.94279	3L
ASTEI01477	260.879	-0.0961672	0.246739	-0.389752	0.69672	0.886126	3L
ASTEI01478	234.916	-0.295247	0.199104	-1.48287	0.138108	0.350854	3L
ASTEI01479	87.8507	-0.164708	0.386769	-0.425858	0.670211	0.875734	3L
ASTEI01480	339.051	-0.19616	0.177183	-1.1071	0.268249	0.544844	3L
ASTEI01481	310.859	-0.789746	0.165076	-4.78413	1.71727e-06	2.84647e-05	3L
ASTEI01482	2251.67	-0.418945	0.156323	-2.67999	0.00736248	0.0380606	3L
ASTEI01483	314.725	0.14178	0.203448	0.696884	0.485876	0.758478	3L
ASTEI01484	90.6349	-0.816384	0.374562	-2.17957	0.0292895	0.114704	3L
ASTEI01485	8.34247	-1.8161	0.863127	-2.1041	0.03537	0.132466	3L
ASTEI01486	474.396	-0.197555	0.159977	-1.2349	0.21687	0.476712	3L
ASTEI01487	494.042	-0.0389256	0.683891	-0.0569179	0.954611	0.985996	3L
ASTEI01488	5.50853	-0.501308	0.81092	-0.618197	0.536446	0.794084	3L
ASTEI01489	0.224975	1.66466	4.36617	0.381263	0.703008	NA	3L
ASTEI01490	181.915	-0.0380176	0.229571	-0.165603	0.86847	0.959811	3L
ASTEI01491	124.73	0.164468	0.665715	0.247054	0.804867	0.937575	3L
ASTEI01492	1135.1	0.420077	0.196754	2.13503	0.0327584	0.1249	3L
ASTEI01493	599.123	0.219888	0.253058	0.868926	0.384888	0.671243	3L
ASTEI01494	1349.32	0.236568	0.168265	1.40592	0.159748	0.389265	3L
ASTEI01495	97.9052	0.467962	0.251781	1.85861	0.063083	0.202305	3L
ASTEI01496	172.06	0.0552946	0.344383	0.160561	0.872439	0.961704	3L
ASTEI01497	454.19	0.102862	0.385665	0.266714	0.789689	0.930621	3L
ASTEI01498	5.62444	0.545147	0.617521	0.8828	0.377344	0.663056	3L
ASTEI01499	642.306	-1.24764	0.13179	-9.46688	2.88341e-21	6.57647e-19	3L
ASTEI01500	382.991	-0.160584	0.349233	-0.459818	0.645647	0.861467	3L
ASTEI01501	34.6297	0.3599	0.401492	0.896405	0.370036	0.65652	3L
ASTEI01502	213.323	0.146605	0.214725	0.682759	0.494759	0.76536	3L
ASTEI01503	158.449	0.22655	0.184136	1.23034	0.218569	0.478602	3L
ASTEI01504	1056.11	-0.978306	0.37674	-2.59677	0.00941048	0.0462416	3L
ASTEI01505	152.526	0.167629	0.213314	0.78583	0.431967	0.716142	3L
ASTEI01506	63.6768	-0.063872	0.287171	-0.222418	0.823988	0.946205	3L
ASTEI01507	265.61	-0.124643	0.641227	-0.194381	0.845877	0.951829	3L
ASTEI01508	220.375	-0.252636	0.192898	-1.30969	0.190301	0.4386	3L
ASTEI01509	520.066	-0.722019	0.432239	-1.67042	0.0948368	0.2687	3L
ASTEI01510	7.29876	-0.525222	0.755412	-0.695279	0.48688	0.759456	3L
ASTEI01511	1.45304	2.22224	1.41395	1.57165	0.116032	0.311215	3L
ASTEI01512	64.7818	0.31072	0.29862	1.04052	0.298098	0.579726	3L
ASTEI01513	144.879	-0.044214	0.461643	-0.0957753	0.923699	0.977591	3L
ASTEI01514	31.8725	-2.59063	0.399169	-6.49005	8.58066e-11	3.62422e-09	3L
ASTEI01515	100.671	0.373748	0.29259	1.27738	0.201469	0.45496	3L
ASTEI01516	161.992	0.033936	0.302178	0.112305	0.910582	0.974686	3L
ASTEI01517	879.467	-0.0129362	0.190587	-0.0678755	0.945885	0.983999	3L
ASTEI01518	401.242	0.193207	0.185841	1.03964	0.298508	0.580028	3L
ASTEI01519	575.619	-0.119267	0.198712	-0.600202	0.548372	0.803319	3L
ASTEI01520	131.059	-0.62632	0.269328	-2.32549	0.0200458	0.0844799	3L
ASTEI01521	633.083	-0.049096	0.363956	-0.134896	0.892694	0.96988	3L
ASTEI01522	90.5338	0.149959	0.24082	0.622703	0.53348	0.792059	3L
ASTEI01523	211.939	0.336985	0.238674	1.4119	0.157978	0.386119	3L
ASTEI01524	129.927	0.834811	0.234461	3.56055	0.00037008	0.00311009	3L
ASTEI01525	52.2687	0.207811	0.321515	0.646351	0.518052	0.78128	3L
ASTEI01526	427.966	-0.237641	0.340671	-0.697568	0.485447	0.758258	3L
ASTEI01527	55.1371	0.0521821	0.252387	0.206754	0.836202	0.950291	3L
ASTEI01528	116.919	0.343522	0.220237	1.55978	0.118811	0.315815	3L
ASTEI01529	3.03373	0.0743781	0.969319	0.0767323	0.938836	0.981975	3L
ASTEI01530	2053.75	0.0428751	0.319716	0.134104	0.893321	0.970231	3L
ASTEI01531	235.92	-0.408775	0.215743	-1.89473	0.0581286	0.191446	3L
ASTEI01532	111.528	0.523286	0.253988	2.06028	0.0393721	0.14313	3L
ASTEI01533	592.658	0.0835116	0.169174	0.493643	0.621558	0.848384	3L
ASTEI01534	564.934	-0.482551	0.181781	-2.65457	0.00794106	0.0403025	3L
ASTEI01535	495.208	0.26295	0.245842	1.06959	0.284804	0.56443	3L
ASTEI01536	357.369	0.0108244	0.453299	0.0238792	0.980949	0.993707	3L
ASTEI01537	837.39	-0.484211	0.148729	-3.25566	0.00113131	0.00795895	3L
ASTEI01538	1117	-0.34575	0.145111	-2.38266	0.0171881	0.0748714	3L
ASTEI01539	219.3	-0.214333	0.311307	-0.688492	0.491143	0.762767	3L
ASTEI01540	881.753	-0.148251	0.186094	-0.796648	0.425656	0.709468	3L
ASTEI01541	338.58	-0.0760883	0.163442	-0.465537	0.641547	0.859691	3L
ASTEI01542	179.518	0.180027	0.173132	1.03983	0.29842	0.579955	3L
ASTEI01543	323.863	-1.01256	0.205717	-4.92212	8.56129e-07	1.56714e-05	3L
ASTEI01544	285.694	-0.361074	0.440747	-0.819232	0.412654	0.697746	3L
ASTEI01545	176.436	-0.20486	0.555859	-0.368547	0.712465	0.893436	3L
ASTEI01546	898.04	-0.0382416	0.317617	-0.120401	0.904165	0.974183	3L
ASTEI01547	448.916	-0.0993572	0.329117	-0.301891	0.762735	0.918989	3L
ASTEI01548	270.346	-0.107331	0.22742	-0.471949	0.636963	0.856692	3L
ASTEI01549	390.166	-0.120149	0.202963	-0.591974	0.553868	0.807138	3L
ASTEI01550	344.663	-0.0150303	0.578404	-0.0259859	0.979269	0.993339	3L
ASTEI01551	235.318	-0.794708	0.182013	-4.36622	1.26413e-05	0.000166966	3L
ASTEI01552	17.9232	-0.483897	0.591289	-0.818375	0.413143	0.697998	3L
ASTEI01553	307.473	-0.327694	0.21095	-1.55342	0.120324	0.318588	3L
ASTEI01554	119.363	-0.490437	0.570811	-0.859193	0.390234	0.676738	3L
ASTEI01555	369.749	-0.652414	0.431116	-1.51331	0.1302	0.336689	3L
ASTEI01556	277.919	-0.44738	0.237892	-1.8806	0.0600263	0.195679	3L
ASTEI01557	135.597	-0.0127779	0.247744	-0.051577	0.958866	0.987676	3L
ASTEI01558	53.2956	-0.0436716	0.273441	-0.159711	0.873109	0.962208	3L
ASTEI01559	175.367	0.823427	0.249893	3.29512	0.000983802	0.00705615	3L
ASTEI01560	105.982	0.210373	0.235994	0.891433	0.372697	0.658795	3L
ASTEI01561	253.873	0.146597	0.259587	0.564733	0.572255	0.819643	3L
ASTEI01562	187.626	0.221832	0.242673	0.914118	0.360655	0.647429	3L
ASTEI01563	54.7383	-1.47823	0.377483	-3.91601	9.00247e-05	0.000929929	3L
ASTEI01564	758.386	0.15388	0.131222	1.17267	0.240927	0.510357	3L
ASTEI01565	509.067	0.0436234	0.225029	0.193857	0.846288	0.951829	3L
ASTEI01566	128.157	0.407406	0.213408	1.90904	0.0562568	0.187036	3L
ASTEI01567	35.0807	-0.131201	0.363654	-0.360785	0.71826	0.896469	3L
ASTEI01568	36.1105	-0.680837	0.423421	-1.60794	0.107848	0.296075	3L
ASTEI01569	46.3154	-0.799607	0.28677	-2.78832	0.00529818	0.0290065	3L
ASTEI01570	455.951	0.0258003	0.289705	0.0890571	0.929036	0.979707	3L
ASTEI01571	210.931	0.307865	0.28563	1.07784	0.281104	0.560145	3L
ASTEI01572	592.184	0.21728	0.172569	1.25909	0.207999	0.465193	3L
ASTEI01573	391.14	0.098164	0.134617	0.729209	0.465874	0.741709	3L
ASTEI01574	252.871	-0.107092	0.299042	-0.358115	0.720257	0.897489	3L
ASTEI01575	714.622	-0.0520756	0.140406	-0.370894	0.710717	0.89299	3L
ASTEI01576	395.99	0.500134	0.139378	3.58831	0.000332822	0.00284095	3L
ASTEI01577	134.288	-0.510591	0.424972	-1.20147	0.22957	0.495179	3L
ASTEI01578	552.186	-0.0425015	0.150554	-0.2823	0.777713	0.925295	3L
ASTEI01579	69.887	-0.337493	0.684742	-0.492875	0.622101	0.84856	3L
ASTEI01580	53.9574	0.00974504	0.420797	0.0231585	0.981524	0.993982	3L
ASTEI01581	109.947	0.266103	0.290624	0.915626	0.359863	0.647218	3L
ASTEI01582	0.552806	-0.782541	2.45288	-0.319029	0.749704	0.912642	3L
ASTEI01583	396.916	-0.501235	0.163541	-3.06488	0.00217754	0.0138885	3L
ASTEI01584	337.676	-1.04876	0.308414	-3.4005	0.000672639	0.00514127	3L
ASTEI01585	6.7513	-0.42832	0.789606	-0.542448	0.58751	0.829955	3L
ASTEI01586	392.352	-0.107803	0.141871	-0.759863	0.447336	0.728053	3L
ASTEI01587	211.691	-0.431689	0.244241	-1.76747	0.077149	0.233062	3L
ASTEI01588	119.052	0.0178816	0.308662	0.0579325	0.953802	0.985996	3L
ASTEI01589	181.552	0.0441201	0.235311	0.187497	0.851271	0.953622	3L
ASTEI01590	2.91085	-0.908496	0.961642	-0.944734	0.344795	0.630842	3L
ASTEI01591	978.309	-0.332833	0.17369	-1.91625	0.0553327	0.184831	3L
ASTEI01592	563.495	-0.128429	0.154498	-0.83127	0.405821	0.691223	3L
ASTEI01593	528.059	-0.127519	0.181632	-0.702076	0.482632	0.755723	3L
ASTEI01594	739.26	0.065837	0.195286	0.337132	0.736017	0.905159	3L
ASTEI01595	21.7652	-0.433886	0.369545	-1.17411	0.240352	0.509569	3L
ASTEI01596	263.375	-0.246214	0.23215	-1.06058	0.28888	0.569164	3L
ASTEI01597	208.513	0.222298	0.169002	1.31535	0.188391	0.435871	3L
ASTEI01598	226.004	0.0989834	0.149954	0.660092	0.509195	0.775123	3L
ASTEI01599	178.212	-1.45141	0.211065	-6.87657	6.13098e-12	3.20723e-10	3L
ASTEI01600	314.581	0.297702	0.173843	1.71247	0.0868095	0.251774	3L
ASTEI01601	87.0346	0.438563	0.252834	1.73459	0.082813	0.244011	3L
ASTEI01602	446.275	-0.111601	0.463984	-0.240528	0.809921	0.939894	3L
ASTEI01603	142.007	-0.0352401	0.166885	-0.211164	0.832759	0.949734	3L
ASTEI01604	94.4824	0.163009	0.221636	0.735483	0.462045	0.738806	3L
ASTEI01605	442.72	0.440435	0.114992	3.83014	0.000128068	0.0012634	3L
ASTEI01606	541.515	1.28998	0.2712	4.75655	1.96925e-06	3.18996e-05	3L
ASTEI01607	1034.61	-0.476017	0.139247	-3.41852	0.000629632	0.00489123	3L
ASTEI01608	79.0949	-0.313844	0.232146	-1.35192	0.1764	0.415911	3L
ASTEI01609	334.28	-0.626531	0.25332	-2.47328	0.013388	0.0612423	3L
ASTEI01610	168.079	-2.05715	0.288443	-7.13193	9.89717e-13	5.8785e-11	3L
ASTEI01611	584.7	-0.55746	0.131003	-4.25532	2.08747e-05	0.000260455	3L
ASTEI01612	72.7268	-0.827284	0.542329	-1.52543	0.127152	0.330306	3L
ASTEI01613	9.78828	-1.34783	0.502515	-2.68218	0.00731443	0.0379253	3L
ASTEI01614	222.801	-0.146321	0.620159	-0.23594	0.813479	0.94201	3L
ASTEI01615	172.696	-1.20303	0.367539	-3.27322	0.0010633	0.00754568	3L
ASTEI01616	533.527	0.387545	0.20708	1.87147	0.0612795	0.198194	3L
ASTEI01617	1721.63	-0.0682306	0.0890142	-0.766514	0.443371	0.724903	3L
ASTEI01618	2125.44	0.0577887	0.0969654	0.595972	0.551194	0.805506	3L
ASTEI01619	11.279	-0.463807	0.54609	-0.849322	0.395702	0.681248	3L
ASTEI01620	1726.36	-0.193766	0.438511	-0.441872	0.658582	0.86977	3L
ASTEI01621	881.804	-0.0686494	0.12337	-0.556453	0.577902	0.822506	3L
ASTEI01622	1018.04	-0.131007	0.260261	-0.503368	0.614706	0.844749	3L
ASTEI01623	852.745	-0.00515757	0.147974	-0.0348546	0.972196	0.990965	3L
ASTEI01624	217.108	0.61317	0.208162	2.94563	0.00322295	0.019213	3L
ASTEI01625	93.8409	-0.170612	0.230595	-0.73988	0.459373	0.736594	3L
ASTEI01626	297.652	-0.118492	0.208456	-0.568429	0.569744	0.817792	3L
ASTEI01627	524.636	-0.936554	0.195746	-4.78453	1.7139e-06	2.84502e-05	3L
ASTEI01628	854.719	-0.740831	0.214711	-3.45036	0.000559848	0.00444294	3L
ASTEI01629	392.735	-4.68295	0.694828	-6.73972	1.58688e-11	7.70197e-10	3R
ASTEI01630	250.829	-0.369017	0.251765	-1.46572	0.142724	0.360174	3R
ASTEI01631	1753.48	0.11476	0.144115	0.796309	0.425852	0.709586	3R
ASTEI01632	111.464	0.713	0.465969	1.53014	0.125981	0.328161	3R
ASTEI01633	281.442	0.397392	0.200541	1.9816	0.0475235	0.165686	3R
ASTEI01636	0.621059	-0.64593	2.24346	-0.287917	0.77341	0.923654	3R
ASTEI01638	218.54	0.427757	0.445844	0.959431	0.337342	0.622499	3R
ASTEI01639	285.251	-0.281018	0.202809	-1.38563	0.165859	0.398285	3R
ASTEI01640	7.65831	1.63483	0.680233	2.40334	0.0162462	0.0714972	3R
ASTEI01641	481.646	-0.356555	0.367702	-0.969685	0.332204	0.617735	3R
ASTEI01642	527.47	-0.750449	0.183734	-4.08444	4.41832e-05	0.000503361	3R
ASTEI01643	84.2631	-0.0607987	0.289153	-0.210265	0.833461	0.949734	3R
ASTEI01644	340.142	-0.355584	0.230896	-1.54002	0.123556	0.323883	3R
ASTEI01645	1214.03	-1.12735	0.519208	-2.17129	0.0299089	0.116529	3R
ASTEI01646	396.529	-0.203332	0.690069	-0.294655	0.768258	0.92198	3R
ASTEI01647	528.416	-0.754097	0.173757	-4.33995	1.42514e-05	0.000184685	3R
ASTEI01648	129.477	-0.272147	0.407767	-0.667409	0.504511	0.772171	3R
ASTEI01649	366.016	0.0206748	0.170129	0.121524	0.903276	0.974183	3R
ASTEI01650	84.4224	0.124114	0.200664	0.618516	0.536235	0.793979	3R
ASTEI01651	17.7654	0.127982	0.418659	0.305694	0.759837	0.91809	3R
ASTEI01652	581.889	-0.425213	0.460607	-0.923159	0.355924	0.643156	3R
ASTEI01653	110.551	-0.61796	0.675277	-0.915121	0.360128	0.647322	3R
ASTEI01654	351.063	-0.383293	0.602983	-0.635661	0.524997	0.785725	3R
ASTEI01655	17.8281	-2.57559	0.545565	-4.72096	2.34731e-06	3.70758e-05	3R
ASTEI01656	2.19451	1.81701	1.20642	1.50612	0.132037	0.339633	3R
ASTEI01657	95.2662	-0.603993	0.315554	-1.91407	0.0556112	0.185382	3R
ASTEI01658	0.482726	0.74566	2.61338	0.285324	0.775396	0.924564	3R
ASTEI01659	371.308	0.0754781	0.236354	0.319344	0.749466	0.912596	3R
ASTEI01660	12.5002	-1.73181	0.574788	-3.01296	0.00258713	0.0160433	3R
ASTEI01661	262.659	-0.759311	0.299394	-2.53616	0.0112075	0.0532767	3R
ASTEI01662	31.0908	0.700647	0.491967	1.42417	0.154396	0.380452	3R
ASTEI01663	237.31	0.142217	0.534244	0.266203	0.790083	0.930796	3R
ASTEI01664	1161.32	0.0285163	0.105627	0.269973	0.787181	0.929779	3R
ASTEI01665	1953.19	-0.605485	0.150706	-4.01765	5.87821e-05	0.000648438	3R
ASTEI01666	22.2483	0.573868	0.342724	1.67443	0.0940459	0.266791	3R
ASTEI01667	694.04	-0.049635	0.425349	-0.116692	0.907104	0.974183	3R
ASTEI01668	107.347	0.271646	0.249562	1.08849	0.276377	0.554993	3R
ASTEI01669	1111.38	0.0465451	0.12367	0.376364	0.706646	0.890962	3R
ASTEI01670	1.25841	-0.247033	1.33367	-0.185228	0.85305	0.953961	3R
ASTEI01671	831.107	0.70582	0.261915	2.69485	0.00704204	0.0367877	3R
ASTEI01672	15.7349	-0.700957	0.449603	-1.55906	0.118983	0.315921	3R
ASTEI01673	3.61191	-0.870642	0.782588	-1.11252	0.265916	0.542418	3R
ASTEI01674	6.13659	0.522231	0.714571	0.730832	0.464882	0.74103	3R
ASTEI01675	1610.27	-1.60443	0.185387	-8.65449	4.95134e-18	6.20495e-16	3R
ASTEI01676	258.317	0.295631	0.388272	0.7614	0.446418	0.727486	3R
ASTEI01677	115.572	-0.580069	0.227977	-2.54442	0.010946	0.0521856	3R
ASTEI01678	1498.7	-1.77977	0.153146	-11.6214	3.20951e-31	2.15301e-28	3R
ASTEI01679	226.772	2.01502	0.201423	10.0039	1.46485e-23	4.28336e-21	3R
ASTEI01680	206.412	-0.384919	0.57996	-0.663698	0.506883	0.773949	3R
ASTEI01681	105.434	-0.411554	0.28068	-1.46627	0.142574	0.359954	3R
ASTEI01682	31.9051	1.58038	0.341703	4.62502	3.74554e-06	5.69986e-05	3R
ASTEI01683	166.915	1.5578	0.270159	5.76625	8.10545e-09	2.36969e-07	3R
ASTEI01684	70.1065	-0.0619858	0.325213	-0.190601	0.848838	0.952492	3R
ASTEI01685	233.788	-0.151128	0.185332	-0.815446	0.414817	0.699237	3R
ASTEI01686	460.684	-0.375501	0.700421	-0.536108	0.591884	0.832248	3R
ASTEI01687	146.99	0.369568	0.205659	1.79699	0.0723372	0.222234	3R
ASTEI01688	611.5	-0.203781	0.184134	-1.1067	0.268425	0.544878	3R
ASTEI01689	6.74486	-2.22146	0.766676	-2.89752	0.0037612	0.0218952	3R
ASTEI01690	82.3067	0.0614064	0.296997	0.206758	0.836199	0.950291	3R
ASTEI01691	327.181	-0.209555	0.185404	-1.13026	0.258366	0.531746	3R
ASTEI01693	412.246	0.416803	0.404143	1.03132	0.302389	0.58468	3R
ASTEI01694	741.444	-0.222333	0.20312	-1.09459	0.273696	0.551843	3R
ASTEI01695	30.5176	0.220514	0.315665	0.69857	0.484821	0.757801	3R
ASTEI01696	29.9085	0.572245	0.405561	1.411	0.158246	0.386432	3R
ASTEI01697	119.172	0.837383	0.211429	3.96059	7.47662e-05	0.000793886	3R
ASTEI01698	0.560979	-3.35667	2.77266	-1.21063	0.226037	0.49036	3R
ASTEI01699	4.10862	-1.80549	0.767256	-2.35318	0.0186137	0.0796214	3R
ASTEI01700	31.5422	-2.63918	0.505091	-5.22516	1.74008e-07	3.69532e-06	3R
ASTEI01701	466.337	0.098114	0.126431	0.776025	0.437734	0.720723	3R
ASTEI01702	174.183	-0.841877	0.254367	-3.3097	0.000933963	0.00678835	3R
ASTEI01703	520.672	-0.838652	0.186928	-4.48649	7.24074e-06	0.000102195	3R
ASTEI01704	209.383	0.418708	0.175542	2.38523	0.0170684	0.0744069	3R
ASTEI01705	2340.41	-1.11525	0.201626	-5.53126	3.17932e-08	8.05711e-07	3R
ASTEI01706	230.349	0.277755	0.42662	0.65106	0.515007	0.77983	3R
ASTEI01707	754.914	-2.01464	0.306174	-6.58003	4.7036e-11	2.08716e-09	3R
ASTEI01708	156.545	-0.303958	0.25282	-1.20227	0.229258	0.494975	3R
ASTEI01709	182.254	-0.350748	0.212958	-1.64703	0.0995521	0.278668	3R
ASTEI01710	756.539	-0.927996	0.216856	-4.27933	1.87456e-05	0.000236739	3R
ASTEI01711	386.701	0.284136	0.161486	1.75951	0.0784906	0.235646	3R
ASTEI01712	42.3288	1.55547	0.387662	4.01245	6.00913e-05	0.00066083	3R
ASTEI01713	956.44	-0.407743	0.194129	-2.10037	0.035696	0.133249	3R
ASTEI01714	236.551	0.415686	0.187813	2.2133	0.0268769	0.10653	3R
ASTEI01715	199.998	-0.0378328	0.211118	-0.179202	0.857779	0.955529	3R
ASTEI01716	21.6019	0.578703	0.411819	1.40524	0.159951	0.389463	3R
ASTEI01717	0.764856	-0.216133	2.58297	-0.0836762	0.933314	0.980033	3R
ASTEI01718	446.717	0.0822746	0.216446	0.380115	0.70386	0.889463	3R
ASTEI01719	203.022	0.0961862	0.320086	0.300501	0.763795	0.919391	3R
ASTEI017191	28.338	0.944554	0.385845	2.44801	0.0143647	0.065006	3R
ASTEI017192	144.846	0.00412391	0.154928	0.0266182	0.978764	0.993339	3R
ASTEI01720	1365.41	-0.910073	0.119988	-7.58469	3.33283e-14	2.36072e-12	3R
ASTEI01722	21.3644	0.439242	0.417722	1.05152	0.29302	0.574257	3R
ASTEI01723	1154.41	-1.23907	0.227712	-5.44138	5.28689e-08	1.27737e-06	3R
ASTEI01724	410.121	-0.942892	0.197462	-4.77505	1.79662e-06	2.95225e-05	3R
ASTEI01725	1158.59	-0.290086	0.433977	-0.668437	0.503855	0.771684	3R
ASTEI01727	1309.36	-0.334865	0.120002	-2.79049	0.00526288	0.0288548	3R
ASTEI01728	102.278	0.710018	0.186088	3.81551	0.000135905	0.00132015	3R
ASTEI01729	77.492	0.53073	0.309206	1.71643	0.0860839	0.250179	3R
ASTEI01730	1589.74	-0.239017	0.152521	-1.56711	0.11709	0.313244	3R
ASTEI01731	143.035	1.38896	0.18368	7.56183	3.97442e-14	2.78063e-12	3R
ASTEI01732	204.215	0.326996	0.152246	2.14781	0.0317287	0.121695	3R
ASTEI01733	101.956	0.160714	0.467007	0.344135	0.730744	0.901734	3R
ASTEI01734	946.589	-0.672583	0.254395	-2.64386	0.00819672	0.0411846	3R
ASTEI01735	64.9178	-1.06989	0.275031	-3.89007	0.000100215	0.00101332	3R
ASTEI01736	41.3725	-0.156496	0.283872	-0.55129	0.581435	0.82543	3R
ASTEI01737	36.1925	0.354863	0.316256	1.12207	0.261831	0.536506	3R
ASTEI01738	87.483	0.347749	0.220275	1.57871	0.114403	0.309087	3R
ASTEI01739	1466.11	-0.145181	0.171239	-0.847829	0.396533	0.681821	3R
ASTEI01740	0.562112	1.23084	2.21213	0.556406	0.577934	0.822506	3R
ASTEI01741	259.808	0.563086	0.13381	4.20811	2.5752e-05	0.000313421	3R
ASTEI01742	39.2971	-0.275578	0.352838	-0.781032	0.434784	0.71859	3R
ASTEI01743	167.479	0.261753	0.20349	1.28632	0.198333	0.451005	3R
ASTEI01744	243.508	0.519065	0.197627	2.62649	0.00862701	0.0429805	3R
ASTEI01745	147.381	0.320216	0.279358	1.14626	0.251689	0.523607	3R
ASTEI01746	1.66391	0.615673	1.18148	0.521102	0.602296	0.8374	3R
ASTEI01747	932.973	0.33324	0.154904	2.15126	0.0314554	0.121147	3R
ASTEI01748	101.316	0.749834	0.243434	3.08023	0.00206839	0.0132815	3R
ASTEI01749	37.7906	0.260062	0.315011	0.825565	0.409051	0.694613	3R
ASTEI01750	153.456	0.559329	0.210576	2.65619	0.007903	0.040163	3R
ASTEI01751	172.531	0.366676	0.170677	2.14836	0.0316854	0.121623	3R
ASTEI01752	26.3028	0.173499	0.564458	0.307374	0.758559	0.917269	3R
ASTEI01753	0.163215	-0.216132	4.40746	-0.0490377	0.960889	NA	3R
ASTEI01754	135.164	-0.318238	0.318563	-0.998981	0.317804	0.603034	3R
ASTEI01755	139.441	0.72672	0.298512	2.43447	0.0149135	0.067011	3R
ASTEI01756	26.6238	2.20032	0.353939	6.21667	5.07829e-10	1.88641e-08	3R
ASTEI01757	231.689	0.0341774	0.494005	0.0691844	0.944843	0.983999	3R
ASTEI01758	0.294681	-0.218427	4.15018	-0.0526307	0.958026	0.987676	3R
ASTEI01759	62.0778	-0.133828	0.259455	-0.515805	0.605991	0.839523	3R
ASTEI01760	276.692	-0.262127	0.386893	-0.677518	0.498077	0.766825	3R
ASTEI01761	421.286	0.226498	0.167675	1.35082	0.176755	0.416297	3R
ASTEI01762	181.999	1.34193	0.326409	4.11119	3.93632e-05	0.000453891	3R
ASTEI01763	239.942	-0.349921	0.147964	-2.36492	0.0180342	0.0775789	3R
ASTEI01764	277.809	-0.280979	0.19366	-1.45089	0.146811	0.367157	3R
ASTEI01765	100.833	-0.275158	0.305758	-0.89992	0.368163	0.654623	3R
ASTEI01766	1321.39	-0.438266	0.144714	-3.02851	0.00245766	0.0153826	3R
ASTEI01767	55.2615	0.587516	0.242459	2.42316	0.0153861	0.0684601	3R
ASTEI01768	24.9948	1.00646	0.386602	2.60334	0.00923208	0.0454981	3R
ASTEI01769	512.017	0.146669	0.319245	0.459424	0.645929	0.861557	3R
ASTEI01770	106.002	-4.07045	0.5419	-7.51146	5.84734e-14	4.0414e-12	3R
ASTEI01771	0.89789	1.2425	1.77311	0.700745	0.483462	0.756514	3R
ASTEI01772	490.282	-0.0567922	0.133349	-0.425893	0.670186	0.875734	3R
ASTEI01773	866.191	-0.321967	0.234861	-1.37088	0.170413	0.406141	3R
ASTEI01774	226.015	-1.09646	0.265683	-4.12693	3.67634e-05	0.000428681	3R
ASTEI01775	30.8577	-0.637766	0.446714	-1.42768	0.153383	0.378872	3R
ASTEI01776	2632.13	-0.365129	0.127747	-2.85821	0.00426036	0.0243036	3R
ASTEI01777	6.76472	-0.126255	0.747023	-0.169011	0.865788	0.95838	3R
ASTEI01778	161.457	0.569021	0.271118	2.09879	0.0358352	0.133568	3R
ASTEI01779	39.1368	-0.122536	0.753862	-0.162544	0.870877	0.961049	3R
ASTEI01780	4.49794	0.865467	0.93611	0.924535	0.355208	0.642665	3R
ASTEI01781	488.941	0.00873899	0.744507	0.011738	0.990635	0.997105	3R
ASTEI01782	1870.89	-0.464574	0.177932	-2.61096	0.00902895	0.0446321	3R
ASTEI01783	126.112	-0.24369	0.245778	-0.991502	0.321441	0.60741	3R
ASTEI01784	55.8141	-0.0441228	0.409886	-0.107647	0.914276	0.97481	3R
ASTEI01785	22.5137	-0.138934	0.388292	-0.357809	0.720486	0.897578	3R
ASTEI01786	50.6235	0.0584635	0.396492	0.147452	0.882775	0.966806	3R
ASTEI01787	70.323	-0.0184523	0.328125	-0.0562354	0.955154	0.986234	3R
ASTEI01788	375.273	-0.244016	0.646596	-0.377385	0.705888	0.890776	3R
ASTEI01789	442.558	-0.453989	0.164386	-2.76173	0.00574955	0.0310512	3R
ASTEI01790	344.908	-0.0744948	0.534571	-0.139354	0.88917	0.968674	3R
ASTEI01791	146.337	-0.0809442	0.74247	-0.10902	0.913187	0.97481	3R
ASTEI01792	12.2136	-0.440635	0.544613	-0.80908	0.418469	0.702624	3R
ASTEI01793	120.551	-0.0253688	0.649926	-0.0390334	0.968864	0.98971	3R
ASTEI01794	210.938	-0.192028	0.217662	-0.88223	0.377652	0.663393	3R
ASTEI01795	224.303	-0.41952	0.165087	-2.5412	0.0110472	0.052602	3R
ASTEI01796	327.113	0.477447	0.161557	2.95528	0.00312381	0.01871	3R
ASTEI01797	5.67314	2.57817	0.793304	3.24992	0.00115437	0.00808724	3R
ASTEI01798	422.052	-1.86859	0.184636	-10.1204	4.48667e-24	1.42128e-21	3R
ASTEI017980	29.8997	2.34071	0.443625	5.27633	1.31794e-07	2.87927e-06	3R
ASTEI017981	0.82969	1.72555	2.00205	0.861895	0.388745	0.675538	3R
ASTEI01799	20.7191	1.01452	0.378534	2.68013	0.0073594	0.0380606	3R
ASTEI01800	114.379	-0.270721	0.178972	-1.51265	0.130369	0.336898	3R
ASTEI01802	0.408645	-1.17792	3.94545	-0.298552	0.765282	0.920113	3R
ASTEI01803	473.047	0.800457	0.152742	5.24057	1.60083e-07	3.45756e-06	3R
ASTEI01804	171.35	-0.0550203	0.273011	-0.201531	0.840283	0.951215	3R
ASTEI01805	12.8127	1.02114	0.600499	1.70049	0.0890387	0.256106	3R
ASTEI01806	279.025	-0.307242	0.375487	-0.818249	0.413215	0.698016	3R
ASTEI01807	1.47184	0.658051	1.91471	0.343682	0.731086	0.901794	3R
ASTEI01808	11.7762	0.326231	0.462862	0.704812	0.480927	0.754349	3R
ASTEI01809	399.368	-0.509106	0.285492	-1.78326	0.0745444	0.2279	3R
ASTEI01810	172.197	-0.426719	0.201758	-2.115	0.0344296	0.129625	3R
ASTEI01811	214.086	-0.32763	0.220849	-1.4835	0.137941	0.350736	3R
ASTEI01812	202.522	-0.280971	0.185388	-1.51559	0.129623	0.335426	3R
ASTEI01814	110.63	2.26977	0.421687	5.38258	7.3427e-08	1.72652e-06	3R
ASTEI01815	219.206	-0.241132	0.209945	-1.14855	0.250742	0.522181	3R
ASTEI01816	846.355	-0.304004	0.229066	-1.32715	0.18446	0.429069	3R
ASTEI01818	74.1207	0.0440777	0.321606	0.137055	0.890987	0.969396	3R
ASTEI01819	67.5947	0.790868	0.284721	2.7777	0.00547456	0.0298289	3R
ASTEI01820	495.574	0.273392	0.198078	1.38022	0.167518	0.401172	3R
ASTEI01821	2350.42	-0.284457	0.191365	-1.48646	0.137156	0.34937	3R
ASTEI01822	85.9726	0.199228	0.241152	0.826153	0.408717	0.694223	3R
ASTEI01823	494.715	-0.857588	0.18543	-4.62486	3.74859e-06	5.69986e-05	3R
ASTEI01824	15.9115	0.874586	0.549968	1.59025	0.111779	0.303846	3R
ASTEI01825	8.11415	-1.2343	0.581005	-2.12442	0.0336351	0.127476	3R
ASTEI01826	164.011	0.363121	0.304486	1.19257	0.233037	0.499489	3R
ASTEI01827	88.2187	0.539173	0.407673	1.32256	0.18598	0.431628	3R
ASTEI01828	151.189	0.301899	0.271026	1.11391	0.265318	0.541946	3R
ASTEI01829	2057.38	-0.214355	0.104863	-2.04415	0.0409388	0.147214	3R
ASTEI01830	180.911	0.232567	0.707384	0.328771	0.742329	0.90861	3R
ASTEI01831	197.527	-0.0356349	0.157695	-0.225974	0.821222	0.944645	3R
ASTEI01832	17.7804	1.1224	0.404839	2.77245	0.00556355	0.0302233	3R
ASTEI01833	1.45601	0.000374885	1.68265	0.000222794	0.999822	0.999822	3R
ASTEI01834	611.718	-0.598892	0.362493	-1.65215	0.0985049	0.276384	3R
ASTEI01835	361.274	-0.947519	0.572397	-1.65535	0.0978529	0.274924	3R
ASTEI01836	92.0548	0.145863	0.305698	0.477148	0.633257	0.853322	3R
ASTEI01837	530.02	0.035084	0.286357	0.122518	0.902489	0.973906	3R
ASTEI01838	112.791	0.31255	0.260616	1.19927	0.230422	0.495611	3R
ASTEI01839	57.485	-0.0493124	0.569192	-0.0866358	0.930961	0.979847	3R
ASTEI01840	318.296	1.27105	0.209189	6.0761	1.2314e-09	4.21709e-08	3R
ASTEI01841	1717.15	0.167269	0.318841	0.524615	0.599851	0.836755	3R
ASTEI01842	90.0796	0.467641	0.303915	1.53872	0.123873	0.324299	3R
ASTEI01843	78.3038	0.042786	0.270935	0.15792	0.87452	0.962972	3R
ASTEI01844	4.46294	0.777941	0.862796	0.901651	0.367242	0.653461	3R
ASTEI01845	31.6051	-0.659128	0.391683	-1.68281	0.0924122	0.263599	3R
ASTEI01846	133.649	-0.0449383	0.196632	-0.228539	0.819227	0.943774	3R
ASTEI01847	446.958	-0.16046	0.626099	-0.256286	0.79773	0.933416	3R
ASTEI01848	151.588	0.237261	0.257698	0.920694	0.35721	0.644707	3R
ASTEI01849	184.99	-0.291438	0.573531	-0.508146	0.611351	0.843028	3R
ASTEI01850	7.80634	0.535575	0.806061	0.664435	0.506412	0.773523	3R
ASTEI01851	8.20345	0.23026	0.812269	0.283477	0.776811	0.925099	3R
ASTEI01852	146.221	-0.43435	0.221462	-1.96129	0.0498453	0.171422	3R
ASTEI01853	97.6209	-0.773346	0.271319	-2.85033	0.00436745	0.0247793	3R
ASTEI01854	306.403	0.234059	0.252442	0.927177	0.353835	0.641209	3R
ASTEI01855	103.381	0.0775972	0.280301	0.276835	0.781906	0.926331	3R
ASTEI01856	334.425	-1.11788	0.184448	-6.0607	1.3553e-09	4.59994e-08	3R
ASTEI01857	98.216	-0.372142	0.216581	-1.71826	0.0857491	0.249779	3R
ASTEI01858	2.07604	1.35539	1.09654	1.23607	0.216434	0.476269	3R
ASTEI01859	83.1786	-0.310665	0.235602	-1.3186	0.187302	0.433877	3R
ASTEI018590	842.459	-2.78668	0.350405	-7.95275	1.82419e-15	1.63803e-13	3R
ASTEI018591	87.7986	0.259155	0.227583	1.13873	0.254818	0.527107	3R
ASTEI01860	186.475	-0.0930014	0.152796	-0.608666	0.542746	0.798539	3R
ASTEI01861	5.82835	0.276116	0.697284	0.395989	0.692113	0.884847	3R
ASTEI01862	829.711	-0.00946773	0.111743	-0.084728	0.932478	0.979853	3R
ASTEI01863	60.037	0.710663	0.314105	2.26251	0.0236662	0.0961965	3R
ASTEI01864	185.232	-1.1161	0.304495	-3.66542	0.000246937	0.00220522	3R
ASTEI01865	0.157352	0.745655	4.40746	0.16918	0.865655	NA	3R
ASTEI01866	62.5348	0.33814	0.226648	1.49192	0.135721	0.346333	3R
ASTEI01867	735.837	-0.563301	0.193892	-2.90523	0.00366982	0.0214839	3R
ASTEI01869	285.718	0.167376	0.220268	0.759876	0.447329	0.728053	3R
ASTEI01871	24.9131	-0.0801888	0.393692	-0.203684	0.8386	0.950923	3R
ASTEI01872	103.176	0.779851	0.248297	3.1408	0.00168489	0.0111195	3R
ASTEI01873	165.412	-0.00186193	0.208027	-0.00895044	0.992859	0.997775	3R
ASTEI01874	1416.36	-0.60254	0.45944	-1.31147	0.189701	0.437772	3R
ASTEI01875	228.694	0.509915	0.156902	3.24989	0.00115451	0.00808724	3R
ASTEI01876	15.8822	1.70048	0.45371	3.74795	0.000178285	0.00167753	3R
ASTEI01877	181.873	-1.16438	0.548426	-2.12313	0.0337428	0.127842	3R
ASTEI01878	91.1865	-0.485628	0.209187	-2.32151	0.0202595	0.0851288	3R
[truncated: 9,782 more rows]

## Sheet: 4_Overlap
Comparison between the two experiments				Comparison between transgenic males and transgenic females
[truncated: 10 more rows]

[truncated: 1 more sheets: 5_Location and status of Xgenes]
